# Supplementary material for: Population and fertility by age and sex for 195 countries and territories, 1950–2017: a systematic analysis for the Global Burden of Disease Study 2017
Source: PubMed Central journal article supplement (PMC6227915; doi:10.1016/s0140-6736(18)32278-5), 2018-11-10
Supplement: mmc1.pdf [file mmc1.pdf]

# THE LANCET

## Supplementary appendix 1

This appendix formed part of the original submission and has been peer reviewed. We post it as supplied by the authors.

Supplement to: GBD 2017 Population and Fertility Collaborators. Population and fertility by age and sex for 195 countries and territories, 1950–2017: a systematic analysis for the Global Burden of Disease Study 2017. *Lancet* 2018; **392**: 1995–2051.

## Methods Appendix to Population and fertility by age and sex for 195 countries and territories 1950–2017: a systematic analysis for the Global Burden of Disease 2017

This appendix provides further methodical detail, supplemental figures, and more detailed results for Population and fertility by age and sex for 195 countries and territories 1950–2017: a systematic analysis for GBD 2017. This appendix is organised into sections that follow the structure of the main paper.

Supplementary results for Population and fertility by age and sex for 195 countries and territories 1950–2017: a systematic analysis for GBD 2017 are presented separately online.

## Background

This appendix provides further methodological detail and more detailed results for Population and fertility by age and sex for 195 countries and territories 1950-2017: a systematic analysis for the GBD 2017. This study complies with the Guidelines for Accurate and Transparent Health Estimates Reporting (GATHER) recommendations. It includes detailed tables and information on data in an effort to maximize transparency in our estimation processes and provide a comprehensive description of analytical steps.

## Table of Contents

|                                                                                                                                                     |     |
|-----------------------------------------------------------------------------------------------------------------------------------------------------|-----|
| Authors' contributions.....                                                                                                                         | 5   |
| Section 1. GBD Overview.....                                                                                                                        | 14  |
| Section 1.1. Geographic Units of the Analysis.....                                                                                                  | 14  |
| Section 1.2. Time Periods of the Analysis.....                                                                                                      | 14  |
| Section 1.3. Statement of GATHER Compliance.....                                                                                                    | 14  |
| Section 1.4. List of Abbreviations.....                                                                                                             | 14  |
| Section 1.5. GBD results overview.....                                                                                                              | 15  |
| Section 1.6. Data input sources overview.....                                                                                                       | 16  |
| Section 1.7. Funding Sources.....                                                                                                                   | 16  |
| Section 2. Population and Fertility Estimation Process.....                                                                                         | 16  |
| Section 2.1. Overview.....                                                                                                                          | 16  |
| Section 2.2. Fertility.....                                                                                                                         | 17  |
| <i>Data Sources</i> .....                                                                                                                           | 17  |
| <i>Modelling Approach</i> .....                                                                                                                     | 19  |
| Section 2.3 Population.....                                                                                                                         | 26  |
| Section 3. Socio-demographic Index (SDI) Analysis.....                                                                                              | 37  |
| Section 3.1. Overview.....                                                                                                                          | 37  |
| Section 3.2 Development of revised SDI indicator.....                                                                                               | 37  |
| Section 4. References.....                                                                                                                          | 39  |
| Section 5. Figures and Tables.....                                                                                                                  | 41  |
| Appendix Figure 1a. Analytical flowchart for the GBD 2017 population estimation process.....                                                        | 42  |
| Appendix Figure 1b. Analytical flowchart for the GBD 2017 fertility estimation process...                                                           | 43  |
| Appendix Figure 2. Census and registry availability by location and year.....                                                                       | 44  |
| Appendix Table 1. GBD location hierarchy with levels.....                                                                                           | 51  |
| Appendix Table 2. GATHER checklist.....                                                                                                             | 65  |
| Appendix Table 3. Number of sources used for the analysis of age-specific fertility (VR, CBH-survey, SBH-survey, SBH-census) for each location..... | 68  |
| Appendix Table 4. Number of sources used for the analysis of age-specific fertility by year (VR, CBH-survey, SBH-survey, SBH-census).....           | 72  |
| Appendix Table 5. List of all confirmed censuses by location and year.....                                                                          | 74  |
| Appendix Table 6. World population standard.....                                                                                                    | 104 |

|                                                                                                                                                                                                               |     |
|---------------------------------------------------------------------------------------------------------------------------------------------------------------------------------------------------------------|-----|
| Appendix Table 7. SDI groupings by geography, based on 2017 values.....                                                                                                                                       | 105 |
| Appendix Table 8. SDI values by location, 1950–1969.....                                                                                                                                                      | 119 |
| Appendix Table 9. SDI values by location, 1970–1989.....                                                                                                                                                      | 129 |
| Appendix Table 10. SDI values by location, 1990–2017.....                                                                                                                                                     | 138 |
| Appendix Table 11. Correlations of fertility by decade and by Socio-demographic Index (SDI) quintile for under-5 mortality, demand for contraception satisfied with modern methods, and female education..... | 143 |

## Authors' Contributions

### Managing the estimation process

Ashkan Afshin, Elizabeth Cromwell, Lalit Dandona, Rakhi Dandona, Louisa Degenhardt, Samath Dharmaratne, Daniel Dicker, Charbel El Bcheraoui, Kara Estep, Valery Feigin, Nancy Fullman, Emmanuela Gakidou, Simon Hay, Spencer James, Nicholas Kassebaum, Ibrahim Khalil, Stephen Lim, Alan Lopez, Raphael Lozano, Felix Masiye, Awoke Misganaw, Ali Mokdad, Christopher Murray, Mohsen Naghavi, David Pigott, Robert Reiner, Joseph Salama, Katya Shackelford, Caitlyn Steiner, Stein Emil Vollset, Theo Vos, and Harvey Whiteford

### Writing the first draft of the manuscript

Charlton Callender, Leslie Cornaby, Kara Estep, Thomas Hsiao, Xie Rachel Kulikoff, James Lee, Stephen Lim, Molly Miller-Petrie, Christopher Murray, Paulami Naik, Joseph Salama, Vinay Srinivasan, and Leo Zoeckler

### Providing data or critical feedback on data sources

Kalkidan Hassen Abate, Aberash Abay, Solomon Mequanente Abay, Tarek Abd Elaziz, Alireza Abdi, Ibrahim Abdollahpour, Molla Abebe, Zegeye Abebe, Victor Aboyans, Aklilu Abrham Roba, Laith Abu-Raddad, Niveen Abu-Rmeileh, Manfred Accrombessi, Oladimeji Adebayo, Isaac Adedeji, Olatunji Adetokunboh, Tara Ballav Adhikari, Mina Adib, Mohsen Afarideh, Sargis Aghayan, Sutapa Agrawal, Mehdi Ahmadi, Muktar Ahmed, Ali Shafqat Akanda, Mohammadesmaeil Akbari, Tomi Akinyemiju, Nadia Akseer, Fares Alahdab, Khurshid Alam, Animut Alebel, Alicia Aleman, Kefyalew Addis Alene, Raghieb Ali, Syed Mohamed Aljunid, François Alla, Peter Allebeck, Ali Almasi, Rajaa Al-Raddadi, Ubai Alsharif, Nelson Alvis-Guzman, Azmeraw T. Amare, Walid Ammar, Catalina Liliana Andrei, Hossein Ansari, Mustafa Geleto Ansha, Carl Abelardo Antonio, Olatunde Aremu, Al Artaman, Krishna K Aryal, Solomon Weldegebreal Asgedom, Reza Assadi, Suleman Atique, Marcel Ausloos, Ashish Awasthi, Beatriz Paulina Ayala Quintanilla, Rakesh Ayer, Peter Azzopardi, Arefeh Babazadeh, Hamid Badali, Alaa Badawi, Maciej Banach, Till Bärnighausen, Lope Barrero, Masoud Behzadifar, Bayu Begashaw Bekele, Saba Abraham Belay, Yihalem Abebe Belay, Aminu Bello, Derrick Bennett, Isabela Bensenor, Adugnaw Berhane, Adam Berman, Robert Bernstein, Tambe Bertrand Ayuk, Mircea Beuran, Soumyadeep Bhaumik, Nigus Bililign, Sait Montes Birlik, Charles Birungi, Nicola Luigi Bragazzi, Alexandra Brazinova, Nicholas Breitborde, Gabrielle Britton, Charlton Callender, Ismael Campos-Nonato, Mate Car, Juan Jesus Carrero, Carlos Castañeda-Orjuela, Franz Castro, Ferrán Catalá-López, Alanur Cavlin, Hsing-Yi Chang, Jung-Chen Chang, Peggy Pei-Chia Chiang, Abdulaal Chitheer, Rajiv Chowdhury, Flavia Cicuttini, Massimo Cirillo, Maria Magdalena Constantin, Cyrus Cooper, Paolo Angelo Cortesi, Alexandra Cucu, Petra Čukelj, Lalit Dandona, Rakhi Dandona, Paul I Dargan, Ahmad Daryani, Rajat Das Gupta, José Das Neves, Kairat Davletov, Gebre Demoz, Kebede Deribe, Nikolaos Dervenis, Don Des Jarlais, Mengistu Desalegn Tadesse, Getenet Dessie, Samath Dharmaratne, Meghnath Dhimal, Eric L. Ding, Girmaye Dinsa, Klara Dokova, David Teye Doku, Kerrie Doyle, Manisha Dubey, Soheil Ebrahimpour, Eyasu Ejeta, Iqbal Elyazar, Aman Endries, Sergey Ermakov, Babak Eshрати, Sharareh Eskandarieh, Alireza Esteghamati, Sadaf Esteghamati, Hamed Fakhim, Mohammad Fareed, Carla Farinha, Andre Faro, Farshad Farzadfar, Mohammad Hosein Farzaei, Valery Feigin, Andrea B. Feigl, Fariba Feizy, Seyed-Mohammad Fereshtehnejad, Irina Filip, Nataliya Foigt, Takeshi Fukumoto, Adriana Galan, Gbetoho Gankpe, Gregory "Manny" M Garcia, M.A. Garcia-Gordillo, Tigist Gashaw, Teshome Gebre, Tsegaye Gebrehiwot, Amanuel Tesfay Gebremedhin, Tilayie Gelano, Johanna Geleijnse, Ayele Geleto, Ricard Genova-Maleras, Kebede Embaye Gezae, Keyghobad Ghadiri,

Hesam Ghiasvand, Mamata Ghimire, Srinivas Goli, Hector Gomez-Dantes, Sameer Gopalani, Bárbara Goulart, Ayman Grada, Giuseppe Grosso, Andre Guimaraes, Prakash Gupta, Rahul Gupta, Rajeev Gupta, Tanush Gupta, Juanita Haagsma, Nima Hafezi Nejad, Tekleberhan Beyene Hagos, Arya Haj-Mirzaian, Randah Hamadeh, Hilda Harb, Josep Maria Haro, Mehedi Hasan, Hadi Hassankhani, Hamid Y. Hassen, Rasmus Havmoeller, Akbar Hedayatizadeh-Omran, Mohamed Hegazy, Behzad Heibati, Behnam Heidari, Delia Hendrie, Claudiu Herteliu, Fatemeh Heydarpour, Long Hoang Nguyen, Michael Hole, Enayatollah Homaie Rad, Praveen Hoogar, H Dean Hosgood, Meimanat Hosseini-Chavoshi, Mehdi Hosseinzadeh, Mohamed Hsairi, Trang Huyen Nguyen, Kim Moesgaard Iburg, Ehimario Igumbor, Asnake Ararsa Irenso, Sheikh Mohammed Shariful Islam, Nader Jahanmehr, Mihajlo Jakovljevic, Moti Jalu , Simerjot Jassal, Mehdi Javanbakht, Achala Jayatilleke, Panniyammakal Jeemon, Vivekanand Jha, Jost B. Jonas, Jacek Jozwiak, Mikk Jürisson, Alemneh Kabeta, Zubair Kabir, Rajendra Kadel, Amaha Kahsay, Rizwan Kalani, Umesh Kapil, Manoochehr Karami, Corine Karema, Seyed M. Karimi, Amir Kasaeian, Getachew Mullu Kassa, Nicholas J Kassebaum, Anil Kaul, Norito Kawakami, Peter Keiyoro, Yousef Khader, Morteza Abdullatif Khafaie, Ibrahim Khalil, Young-Ho Khang, Alireza Khatony, Abdullah T. Khoja, Ardeshir Khosravi, Mohammad Hossein Khosravi, Daniel Kiirithio, Daniel Kim, Jun Kim, Young-Eun Kim, Adnan Kisa, Mika Kivimaki, Yoshihiro Kokubo, Soewarta Kosen, Parvaiz Koul, Ai Koyanagi, Kewal Krishan, Sanjay Krishnaswami, Kristopher Krohn, Barthelemy Kuate Defo, Burcu Kucuk Bicer, G Anil Kumar, Manasi Kumar, Pushpendra Kumar, Sudhir Kumar Jain, Michael Kutz, Sheetal Lad, Alessandra Lafranconi, Dharmesh Lal, Ratilal Laloo, Hilton Lam, Faris Lami, Van Lansingh, Dennis Laryea, Misgan Legesse Liben, Cheru T Leshargie, Xiaohong Li, Yichong Li, Juan Liang, Xiaofeng Liang, Lee-Ling Lim, Shiwei Liu, Alan Lopez, Paulo Lotufo, Eryln Rachelle Macarayan, Marek Majdan, Reza Majdzadeh, Azeem Majeed, Mohammad Ali Mansournia, Joemer Maravilla, Francisco Rogerlândio Martins-Melo, Winfried März, Melvin Marzan, Felix Masiye, Mohsen Mazidi, John Mcgrath, Varshil Mehta, Hagazi Gebre Meles, Kidanu Meles, Addisu Melese, Mulugeta Melku, Peter Memiah, Walter Mendoza, Melkamu Merid Mengesha, Getnet Mengistu, Zerihun Menlkalew Zenebe , Beyene Meressa, Atte Meretoja, Tuomo Meretoja, Tomislav Mestrovic, Haftay Berhane Mezgebe, Tomasz Miazgowski, Erkin Mirrakhimov, Babak Moazen, Karzan Mohammad, Moslem Mohammadi, Shafiu Mohammed, Ali H. Mokdad, Glen Mola, Lorenzo Monasta, Julio Montañez, Ghobad Moradi, Maziar Moradi-Lakeh, Mehdi Moradinazar, Joana Morgado-Da-Costa, Rintaro Mori, Shane Morrison, Marilita Moschos, Seyyed Meysam Mousavi, Achenef Muche, Kamarul Imran Musa, Ghulam Mustafa, Jean Nachega, Gabriele Nagel, Mohsen Naghavi, Seyed Sina Naghibi Irvani, Gurudatta Naik, Luigi Naldi, Bruno Nascimento, Haseeb Nawaz, Ionut Negoii, Ruxandra Irina Negoii, Charles Newton, Josephine Ngunjiri, Ana Maria Nogales Vasconcelos, Shuhei Nomura, Mehdi Noroozi, Jean Jacques Noubiap, Hamid Reza Nouri, Malihe Nourollahpour, Mohammad Reza Nowroozii, Okechukwu Ogah, Felix Ogbo, In-Hwan Oh, Anselm Okoro, Olanrewaju Oladimeji, Andrew T. Olagunju, Tinuke Olagunju, Bolajoko Olusanya, Jacob Olusanya, Sok King Ong, Stanislav S. Otstavnov, Mayowa Owolabi, Mahesh P A, Smita Pakhale, Adrian Pana, Basant Kumar Panda, Songhomitra Panda-Jonas, Eun-Kee Park, Shanti Patel, Snehal Patil, Ajay Patle, Deepak Paudel, Marcel Pedroso, David Pereira, William Petri, Max Petzold, Huyen Phuc Do, David Pigott, Julian Pillay, Meghdad Pirsaeheb, Akram Pourshams, Hossein Poustchi, Swayam Prakash, Mostafa Qorbani, Amir Radfar, Anwar Rafay, Alireza Rafiei, Fakher Rahim, Afarin Rahimi-Movaghar, Vafa Rahimi-Movaghar, Mahfuzar Rahman, Mohammad Hifz Ur Rahman, Sajjad Rahman, Fatemeh Rajati, Sasa Rajsic, Chhani Lal Ranabhat, Prabhat Ranjan, Paturi Rao, David Rawaf, Salman Rawaf, Christian Razo, Andre Renzaho, Shahab Rezaeian, Seyed Mohammad Riahi, Maria Jesús Ríos Blancos, Leonardo Roever, Luca Ronfani, Gholamreza Roshandel, Ali Rostami, Enrico Rubagotti, Hosein Safari, Yahya Safari, Saeid Safiri, Mohammad Ali Sahraian,

Mohamadreza Salahshoor, Nasir Salam, Joseph Salama, Payman Salamati, Yahya Salimi, Hamideh Salimzadeh, Evanson Z Sambala, Abdallah M. Samy, Juan Sanabria, Milena Santric Mlicevic, Bruno Sao Jose, Muthupandian Saravanan, Mayank Sardana, Rodrigo Sarmiento-Suarez, Benn Sartorius, Shahabeddin Sarvi, Maheswar Satpathy, Arundhati Sawant, Monika Sawhney, Sonia Saxena, Elke Schaeffner, David C Schwebel, Falk Schwendicke, Mario Šekerija, Sadaf Sepanlou, Edson Serván-Mori, Amira Shaheen, Masood Ali Shaikh, Mehran Shams-Beyranvand, Morteza Shamsizadeh, Kiomars Sharafi, Mehdi Sharif, Jayendra Sharma, Jun She, Aziz Sheikh, Peilin Shi, Ivy Shiue, Farhad Shokrane, Soraya Siabani, Abila Sibai, Diego Augusto Santos Silva, Dayane Silveira, Jasvinder Singh, Virendra Singh, Adauto Martins Soares Filho, Soheila Sobhani, Moslem Soofi, Luisa Sorio Flor, Chandrashekhar T Sreeramareddy, Mark Stokes, Muawiyah Babale Sufiyan, Rizwan Suliankatchi Abdulkader, Bryan L. Sykes, Dillon Sylte, Cassandra Szoeka, Rafael Tabarés-Seisdedos, Karen Tabb, Segen Tassew, Nuno Taveira, Mohamad-Hani Temsah, Abdullah Terkawi, Belay Tessema, Mebrahtu Teweldemedhin, Js Thakur, Nu Thi Truong, Nihal Thomas, Binyam Tilahun, Marcello Tonelli, Miguel Tortajada-Girbés, Marcos Roberto Tovani-Palone, Hideaki Toyoshima, Bach Tran, Khanh Bao Tran, Thomas Truelsen, Nikolaos Tsilimparis, Kingsley N. Ukwaja, Irfan Ullah, Muhammad Shariq Usman, Olalekan Uthman, Muthiah Vaduganathan, Afsane Vaezi, Gaurang Vaidya, Pascual Valdez, Tommi Vasankari, Narayanaswamy Venketasubramanian, Sergey Vladimirov, Vasiliy Vlassov, Fasil Wagnew, Yasir Waheed, Walson Walson, Yanping Wang, Yuan-Pang Wang, Elisabete Weiderpass, Robert Weintraub, Inbal Weiss Salz, Andrea Werdecker, Ronny Westerman, Justyna Widecka, Katarzyna Widecka, Tissa Wijeratne, Charles Shey Wiysonge, Charles Wolfe, Shouling Wu, Grant Wyper, Gelin Xu, Tomohide Yamada, Yasin Jemal Yasin, Pengpeng Ye, Alex Yeshnaeh, Manaye Yihune, Ebrahim M. Yimer, Naohiro Yonemoto, Seok-Jun Yoon, Marcel Yotebieng, Mustafa Younis, Vesna Zadnik, Zoubida Zaidi, Sojib Bin Zaman, Mohammad Zamani, Zohreh Zare, Xueying Zhang, Jun Zhu, Stephanie Zimsen, and Sanjay Zodpey.

#### [Developing methods or computational machinery](#)

Tarek Abd Elaziz, Ibrahim Abdollahpour, Isaac Adedeji, Sutapa Agrawal, Mehdi Ahmadi, Mohammedsmaeil Akbari, Mehran Alijanzadeh, Suleman Atique, Habtamu Wondifraw Baynes, Sait Montes Birlik, Roy Burstein, Charlton Callender, Pankaj Chaturvedi, Ahmad Daryani, Daniel Dicker, Hamed Fakhim, Mohammad Fareed, Farshad Farzadfar, Samuel Finegold, Kyle Foreman, Keyghobad Ghadiri, Akbar Hedayatzadeh-Omran, Meimanat Hosseini-Chavoshi, Mehdi Hosseinzadeh, Thomas Hsiao, Umesh Kapil, André Karch, Nicholas J Kassebaum, Ibrahim Khalil, Muhammad Shahzeb Khan, Adnan Kisa, Xie Rachel Kulikoff, Michael Kutz, Misgan Legesse Liben, Tefera Chane Mekonnen, Hagazi Gebre Meles, Kidanu Meles, Melkamu Merid Mengesha, Christopher J L Murray, Ayenew Negesse, Grant Nguyen, Bolajoko Olusanya, Jacob Olusanya, Aaron Osgood-Zimmerman, Mayowa Owolabi, David Pigott, Chhani Lal Ranabhat, Robert Reiner, Nicholas Roberts, Mohamadreza Salahshoor, Abdallah M. Samy, Shahabeddin Sarvi, Maheswar Satpathy, Kathryn Schelonka, David C Schwebel, Mehdi Sharif, Tariq Jamal Siddiqi, Naris Silpakit, Vinay Srinivasan, Leo Stewart, Ipsita Sutradhar, Bryan L. Sykes, Dillon Sylte, Segen Tassew, Irfan Ullah, Muhammad Shariq Usman, Tommi Vasankari, Ronny Westerman, Naohiro Yonemoto, and Leo Zoekler.

#### [Applying analytical methods to produce estimates](#)

Tarek Abd Elaziz, Daisy Maria Xavier Abreu, Aklilu Abrham Roba, Sutapa Agrawal, Muktar Ahmed, Sayem Ahmed, Amani Nidhal Aichour, Ibtihel Aichour, Miloud Taki Eddine Aichour, Syed Mohamed Aljunid, Olatunde Aremu, Solomon Weldegebreal Asgedom, Arindam Basu, Masoud Behzadifar, Bayu Begashaw Bekele, Gregory Bertolacci, Sait Montes Birlik, Alexandra Brazinova, Charlton Callender,



Devasahayam Jesudas Christopher, Matthew Cunningham, Ahmad Daryani, Don Des Jarlais, Daniel Dicker, Tim Driscoll, Manisha Dubey, Aman Endries, Sergey Ermakov, Alireza Esteghamati, Fariba Feizy, Samuel Finegold, Florian Fischer, Ayele Geleto, Keyghobad Ghadiri, Nima Hafezi Nejad, Dessalegn Haile, Hamid Y. Hassen, Akbar Hedayatizadeh-Omran, Nathaniel Henry, Long Hoang Nguyen, Meimanat Hosseini-Chavoshi, Thomas Hsiao, Trang Huyen Nguyen, Moti Jalu, Manoochehr Karami, Barthelemy Kuate Defo, Xie Rachel Kulikoff, Van Lansingh, James Lee, Misgan Legesse Liben, James Leigh, Samson Leta, Xiaofeng Liang, Reza Malekzadeh, Melvin Marzan, Mohsen Mazidi, Sanjay Mehendale, Tefera Chane Mekonnen, Hagazi Gebre Meles, Melkamu Merid Mengesha, Shafiu Mohammed, Haseeb Nawaz, Ayenew Negesse, Grant Nguyen, Jacob Olusanya, Huyen Phuc Do, David Pigott, Caroline Purcell, Alireza Rafiei, Fakher Rahim, Mahfuzar Rahman, Fatemeh Rajati, Chhani Lal Ranabhat, Seyed Mohammad Riahi, Kedir Teji Roba, Mohamadreza Salahshoor, Abdallah M. Samy, Shahabeddin Sarvi, Maheswar Satpathy, Arundhati Sawant, Masood Ali Shaikh, Mehdi Sharif, Jun She, Diego Augusto Santos Silva, Chandrashekhar T Sreeramareddy, Vinay Srinivasan, Dillon Sylte, Nu Thi Truong, Miguel Tortajada-Girbés, Bach Tran, Khanh Bao Tran, Kingsley N. Ukwaja, Ronny Westerman, Tissa Wijeratne, Mustafa Younis, Chuanhua Yu, Zoubida Zaidi, and Leo Zoeckler.

#### [Providing critical feedback on methods or results](#)

Degu Abate, Kalkidan Hassen Abate, Aberash Abay, Solomon Mequanente Abay, Nooshin Abbasi, Hedayat Abbastabar, Tarek Abd Elaziz, Jemal Abdela, Omar Abdel-Rahman, Alireza Abdi, Ibrahim Abdollahpour, Haftom Abebe, Molla Abebe, Zegeye Abebe, Teshome Abebo, Haftom Abraha, Daisy Maria Xavier Abreu, Aklilu Abrham Roba, Niveen Abu-Rmeileh, Pawan Acharya, Abdu Adamu, Oladimeji Adebayo, Isaac Adedeji, Victor Adekanmbi, Olatunji Adetokunboh, Tara Ballav Adhikari, Mina Adib, Kouablan Arsène Adou, José C. Adsuar, Mohsen Afarideh, Ashkan Afshin, Gina Agarwal, Sargis Aghayan, Sutapa Agrawal, Manzoor Ahmad, Alireza Ahmadi, Mehdi Ahmadi, Muktar Ahmed, Sayem Ahmed, Amani Nidhal Aichour, Ibtihel Aichour, Miloud Taki Eddine Aichour, Ali Shafqat Akanda, Mohammadesmaeil Akbari, Mohammed Akibu, Rufus Akinyemi, Tomi Akinyemiju, Nadia Akseer, Fares Alahdab, Ziyad Al-Aly, Khurshid Alam, Animut Alebel, Kefyalew Addis Alene, Ayman Al-Eyadhy, Mehran Alijanzadeh, Reza Alizadeh-Navaei, Syed Mohamed Aljunid, Ala'a Alkerwi, Peter Allebeck, Ali Almasi, Jordi Alonso, Rajaa Al-Raddadi, Ubai Alsharif, Khalid Altirkawi, Nelson Alvis-Guzman, Azmeraw T. Amare, Walid Ammar, Catalina Liliana Andrei, Sofia Androudi, Hossein Ansari, Carl Abelardo Antonio, Seth Christopher Yaw Appiah, Olatunde Aremu, Johan Ärnlov, Al Artaman, Krishna K Aryal, Hamid Asayesh, Ephrem Tsegay Asfaw, Solomon Weldegebreal Asgedom, Reza Assadi, Tesfay Mehari Atey, Suleman Atique, Madhu S. Atteraya, Marcel Ausloos, Euripide Avokpaho, Ashish Awasthi, Beatriz Paulina Ayala Quintanilla, Wondimu Ayele, Rakesh Ayer, Peter Azzopardi, Tesleem Babalola, Arefeh Babazadeh, Alaa Badawi, Suzanne Barker-Collo, Till Bärnighausen, Lope Barrero, Huda Basaleem, Quique Bassat, Arindam Basu, Bernhard Baune, Habtamu Wondifraw Baynes, Ettore Beghi, Meysam Behzadifar, Abate Bekele, Bayu Begashaw Bekele, Ezra Belay, Saba Abraham Belay, Yihalem Abebe Belay, Michelle Bell, Aminu Bello, Derrick Bennett, Isabela Bensenor, Gilles Bergeron, Adugnaw Berhane, Adam Berman, Eduardo Bernabe, Robert Bernstein, Balem Demtsu Betsu, Mircea Beuran, Suraj Bhattarai, Soumyadeep Bhaumik, Belete Biadgo, Ali Bijani, Boris Bikbov, Nigus Bililign, Muhammad Shahdaat Bin Sayeed, Sait Menten Birlik, Charles Birungi, Tuhin Biswas, Hailemichael Bizuneh, Archie Bleyer, Cristina Bosetti, Soufiane Boufous, Oliver Brady, Nicola Luigi Bragazzi, Michael Brainin, Nicholas Breitborde, Hermann Brenner, Gabrielle Britton, Roy Burstein, Reinhard Busse, Zahid Butt, Lucero Cahuana-Hurtado, Charlton Callender, Jorge Cano, Mate Car, Rosario Cárdenas, Juan Jesus Carrero, Felix Carvalho, Carlos Castañeda-Orjuela, Franz Castro, Ferrán Catalá-López, Ester Cerin, Jung-Chen Chang, Aparajita Chattopadhyay,

Pankaj Chaturvedi, Peggy Pei-Chia Chiang, Ken Chin, Vesper Chisumpa, Jee-Young Choi, Devasahayam Jesudas Christopher, Liliana G Ciobanu, Rafael Claro, Daniel Collado-Mateo, Maria Magdalena Constantin, Sara Conti, Cyrus Cooper, Paolo Angelo Cortesi, Monica Cortinovic, Megan Costa, Christopher Crowe, Alexandra Cucu, Berihun Dachew, Lalit Dandona, Rakhi Dandona, Paul I Dargan, Ahmad Daryani, Rajat Das Gupta, José Das Neves, Dragos Davitoiu, Diego De Leo, Jan-Walter De Neve, Megbaru Debalkie, Tizta Degfie, Gebre Demoz, Edgar Denova-Gutiérrez, Kebede Deribe, Nikolaos Dervenis, Mengistu Desalegn Tadese, Getenet Dessie, Samath Dharmaratne, Meghnath Dhimal, Daniel Dicker, Eric L. Ding, Girmaye Dinsa, Shirin Djalalinia, Klara Dokova, David Teye Doku, Kerrie Doyle, Tim Driscoll, Manisha Dubey, Eleonora Dubljanin, Andre Duraes, Soheil Ebrahimpour, David Edvardsson, Eyasu Ejeta, Ziad El-Khatib, Ahmadali Enayati, Aman Endries, Sergey Ermakov, Babak Eshrati, Sharareh Eskandarieh, Alireza Esteghamati, Sadaf Esteghamati, Hamed Fakhim, Tamer Farag, Mahbobeh Faramarzi, Carla Farinha, Andre Faro, Farshad Farzadfar, Mohammad Hosein Farzaei, Mir Sohail Fazeli, Valery Feigin, Andrea B. Feigl, Fariba Feizy, Ama Fenny, Netsanet Fentahun, Seyed-Mohammad Fereshtehnejad, Eduarda Fernandes, Garumma Tolu Feyissa, Irina Filip, Samuel Finegold, Florian Fischer, Nataliya Foigt, Kyle Foreman, Carla Fornari, Takeshi Fukumoto, Nancy Fullman, Adriana Galan, Silvano Gallus, Amiran Gamkrelidze, Morsaleh Ganji, Tigist Gashaw, Abadi Kahsu Gebre, Teshome Gebre, Gebremedhin Berhe Gebregergs, Tsegaye Gebrehiwot, Merhawi Gebremedhin, Afewerki Gebremeskel, Aregawi Gebreyesus Belay, Tilayie Gelano, Yalemzewod Gelaw, Johanna Geleijnse, Ayele Geleto, Ricard Genova-Maleras, Kebede Embaye Gezae, Reza Ghadimi, Keyghobad Ghadiri, Maryam Ghasemi-Kasman, Hesam Ghiasvand, Mamata Ghimire, Alope Gopal Ghoshal, Kidu Gidey, Paramjit Gill, Tiffany Gill, Meaza Girma, Giorgia Giussani, Srinivas Goli, Philimon Gona, Amador Goodridge, Sameer Gopalani, Bárbara Goulart, Ayman Grada, Giuseppe Grosso, Harish Gugnani, Yuming Guo, Rahul Gupta, Rajeev Gupta, Tanush Gupta, Juanita Haagsma, Nima Hafezi Nejad, Tekleberhan Beyene Hagos, Dessalegn Haile, Gessesew Bugssa Hailu, Arvin Haj-Mirzaian, Arya Haj-Mirzaian, Randah Hamadeh, Samer Hamidi, Graeme Hankey, Yuantao Hao, Hilda Harb, Habtamu Hareri, Hamidreza Haririan, Josep Maria Haro, Mehedi Hasan, Hadi Hassankhani, Hamid Y. Hassen, Rasmus Havmoeller, Akbar Hedayatzadeh-Omran, Mohamed Hegazy, Behzad Heibati, Behnam Heidari, Delia Hendrie, Andualem Henok, Claudiu Herteliu, Fatemeh Heydarpour, Desalegn Hibstu, Long Hoang Nguyen, Michael Hole, Enayatollah Homaie Rad, Praveen Hoogar, H Dean Hosgood, Mostafa Hosseini, Mihaela Hostiuc, Sorin Hostiuc, Guoqing Hu, John Huang, Trang Huyen Nguyen, Kim Moesgaard Iburg, Ehimario Igumbor, Olayinka Ilesanmi, Usman Iqbal, Asnake Ararsa Irenso, Sheikh Mohammed Shariful Islam, Nader Jahanmehr, Mihajlo Jakovljevic, Moti Jalu, Spencer James, Mehdi Javanbakht, Panniyammakal Jeemon, Ravi Prakash Jha, Vivekanand Jha, Jost B. Jonas, Jacek Jozwiak, Suresh Jungari, Mikk Jürisson, Alemneh Kabeta, Zubair Kabir, Rajendra Kadel, Amaha Kahsay, Rizwan Kalani, Manoochehr Karami, André Karch, Corine Karema, Seyed M. Karimi, Amir Kasaeian, Getachew Mullu Kassa, Tesfaye Kassa, Nicholas J Kassebaum, Anshul Kastor, Vittal Katikireddi, Peter Keiyoro, Andre P Kengne, Andre Keren, Maia Kereselidze, Yousef Khader, Morteza Abdullatif Khafaie, Nauman Khalid, Ejaz Khan, Muhammad Shahzeb Khan, Young-Ho Khang, Tripti Khanna, Mona Khater, Zahra Khazaeipour, Habibolah Khazaie, Abdullah T. Khoja, Ardeshir Khosravi, Mohammad Hossein Khosravi, Getiye Kibret, Daniel Kiirithio, Paul Kilgore, Daniel Kim, Yun Jin Kim, Ruth Kimokoti, Yohannes Kinfu, Sanjay Kinra, Adnan Kisa, Mika Kivimaki, Sonali Kochhar, Tufa Kolola, Jacek Kopec, Margaret Kosek, Parvaiz Koul, Ai Koyanagi, Kewal Krishan, Kristopher Krohn, Barthelémy Kuate Defo, Xie Rachel Kulikoff, G Anil Kumar, Manasi Kumar, Pushpendra Kumar, Fekede Asefa Kumsa, Sheetal Lad, Alessandra Lafranconi, Dharmesh Lal, Ratilal Laloo, Hilton Lam, Faris Lami, Dennis Laryea, Zohra Lassi, Avula Laxmaiah, Jeffrey Lazarus, Paul Lee, Misgan Legesse Liben, James Leigh, Cheru T Leshargie,

Samson Leta, Miriam Levi, Shanshan Li, Lee-Ling Lim, Miteku Limenih, Shai Linn, Alan Lopez, Stefan Lorkowski, Paulo Lotufo, Raimundas Lunevicius, Crispin Mabika Mabika, Erlyn Rachelle Macarayan, Mark Mackay, Fabiana Madotto, Marek Majdan, Reza Majdzadeh, Azeem Majeed, Reza Malekzadeh, Abdullah Mamun, Srikanth Mangalam, Mohammad Ali Mansournia, Lorenzo Mantovani, Chabila Mapoma, Dadi Marami, Joemer Maravilla, Francisco Rogerlândio Martins-Melo, Melvin Marzan, Tivani Mashamba-Thompson, Felix Masiye, Amanda J. Mason-Jones, Benjamin Massenburg, Manu Mathur, Pallab K Maulik, Mohsen Mazidi, John Mcgrath, Suresh Mehata, Sanjay Mehendale, Man Mohan Mehndiratta, Ravi Mehrotra, Saeed Mehrzadi, Kala M. Mehta, Varshil Mehta, Tefera Chane Mekonnen, Hagazi Gebre Meles, Kidanu Meles, Addisu Melese, Mulugeta Melku, Peter Memiah, Ziad Memish, Walter Mendoza, Melkamu Merid Mengesha, Getnet Mengistu, Zerihun Menlkalew Zenebe , George Mensah, Beyene Meressa, Seid Tiku Mereta, Atte Meretoja, Tuomo Meretoja, Tomislav Mestrovic, Haftay Berhane Mezgebe, Bartosz Miazgowski, Tomasz Miazgowski, Ted R Miller, Molly Miller-Petrie, Parvaneh Mirabi, Andreea Mirica, Erkin Mirrakhimov, Babak Moazen, Moslem Mohammadi, Mohammed Mohammed, Shafiu Mohammed, Ali H. Mokdad, Mulugeta Molla, Mariam Molokhia, Lorenzo Monasta, Ghobad Moradi, Mahmoudreza Moradi, Maziar Moradi-Lakeh, Mehdi Moradinazar, Paula Moraga, Joana Morgado-Da-Costa, Shane Morrison, Marilita Moschos, Achenef Muche, Kindie Fentahun Muchie, Ulrich Mueller, Tasha Murphy, Jonah Musa, Kamarul Imran Musa, Jean Nachega, Gabriele Nagel, Seyed Sina Naghibi Irvani, Aliya Naheed, Azin Nahvijou, Gurudatta Naik, Farid Najafi, Vinay Nangia, Jobert Richie Nansseu, Bruno Nascimento, Haseeb Nawaz, Busisiwe Ncama, Ayenew Negesse, Ionut Negoii, Ruxandra Irina Negoii, Subas Neupane, Charles Newton, Frida Ngalesoni, Josephine Ngunjiri, Grant Nguyen, Muhammad Imran Nisar, Ana Maria Nogales Vasconcelos, Mehdi Noroozi, Hamid Reza Nouri, Malihe Nourollahpour, Dina Nur Anggraini Ningrum, Alypio Nyandwi, Peter Nyasulu, Richard Ofori-Asenso, Okechukwu Ogah, Felix Ogbo, In-Hwan Oh, Anselm Okoro, Olanrewaju Oladimeji, Andrew T. Olagunju, Tinuke Olagunju, Pedro Olivares, Bolajoko Olusanya, Jacob Olusanya, Alberto Ortiz, Aaron Osgood-Zimmerman, Erika Ota, Brenda Otieno, Stanislav S. Otstavnov, Mayowa Owolabi, Abayomi Oyekale, Mahesh P A, Smita Pakhale, Adrian Pana, Basant Kumar Panda, Songhomitra Panda-Jonas, Eun-Kee Park, Hadi Parsian, Shanti Patel, Snehal Patil, George Patton, Deepak Paudel, David Pereira, Norberto Perico, Konrad Pesudovs, Huyen Phuc Do, Julian Pillay, Guilherme Polanczyk, Maarten Postma, Farshad Pourmalek, Akram Pourshams, Hossein Poustchi, Swayam Prakash, Narayan Prasad, Manorama Purwar, Mostafa Qorbani, Reginald Quansah, Amir Radfar, Anwar Rafay, Fakher Rahim, Afarin Rahimi-Movaghar, Vafa Rahimi-Movaghar, Mahfuzar Rahman, Md Shafiur Rahman, Muhammad Aziz Rahman, Sajjad Rahman, Rajesh Kumar Rai, Fatemeh Rajati, Usha Ram, Chhani Lal Ranabhat, Prabhat Ranjan, David Rawaf, Salman Rawaf, Sarah Ray, Christian Razo, Robert Reiner, Cesar Reis, Giuseppe Remuzzi, Andre Renzaho, Serge Resnikoff, Satar Rezaei, Shahab Rezaeian, Mohammad Sadegh Rezai, Seyed Mohammad Riahi, Maria Jesús Ríos Blancos, Kedir Teji Roba, Nicholas Roberts, Leonardo Roever, Luca Ronfani, Gholamreza Roshandel, Ali Rostami, George Ruhago, Yogesh Sabde, Perminder Sachdev, Basema Saddik, Hosein Safari, Yahya Safari, Roya Safari-Faramani, Mahdi Safdarian, Saeid Safiri, Rajesh Sagar, Amirhossein Sahebkar, Mohammad Ali Sahraian, Haniye Sadat Sajadi, Mohamadreza Salahshoor, Raphael Saldanha, Zikria Saleem, Yahya Salimi, Hamideh Salimzadeh, Joshua A Salomon, Sundeep Salvi, Evanson Z Sambala, Abdallah M. Samy, Juan Sanabria, Maria Dolores Sanchez-Niño, Ricardo Santiago, Itamar Santos, Milena Santric Mlicevic, Bruno Sao Jose, Muthupandian Saravanan, Mayank Sardana, Abdur Razzaque Sarker, Rodrigo Sarmiento-Suarez, Satish Saroshe, Benn Sartorius, Shahabeddin Sarvi, Brijesh Sathian, Thirunavukkarasu Sathish, Maheswar Satpathy, Arundhati Sawant, Monika Sawhney, Sonia Saxena, Elke Schaeffner, Ione Schneider, David C Schwebel, Falk Schwendicke, Soraya Seedat,

Sadaf Sepanlou, Edson Serván-Mori, Hosein Shabaninejad, Azadeh Shafieesabet, Amira Shaheen, Masood Ali Shaikh, Marina Shakhnazarova, Mehran Shams-Beyranvand, Mohammadbagher Shamsi, Heidar Sharafi, Kiomars Sharafi, Mehdi Sharif, Mahdi Sharif-Alhoseini, Rajesh Sharma, Aziz Sheikh, Kenji Shibuya, Mika Shigematsu, Rahman Shiri, Ivy Shiue, Sharvari Shukla, Si Si, Soraya Siabani, Tariq Jamal Siddiqi, Inga Dora Sigfusdottir, Rannveig Sigurvinsdottir, Diego Augusto Santos Silva, João Pedro Silva, Dayane Silveira, Narayana Sarma Singam, Jasvinder Singh, Narinder Pal Singh, Dharendra Narain Sinha, Badr Sobaih, Soheila Sobhani, Moslem Soofi, Ireneous Soyiri, Chandrashekhar T Sreeramareddy, Vladimir Starodubov, Caitlyn Steiner, Mark Stokes, Mark Strong, Muawiyah Babale Sufiyan, Rizwan Suliankatchi Abdulkader, Gerhard Sulo, Bruno Sunguya, Ipsita Sutradhar, Bryan L. Sykes, Pn Sylaja, Dillon Sylte, Cassandra Szoeki, Karen Tabb, Santosh Tadakamadla, Nikhil Tandon, Segen Tassew, Nuno Taveira, Arash Tehrani-Banihashemi, Zelalem Teklemariam, Mohamad-Hani Temsah, Tewodros Tesfa, Belay Tessema, Mebrahtu Teweldemedhin, Js Thakur, Kavumpurathu Thankappan, Nu Thi Truong, Nihal Thomas, Alan Thomson, Binyam Tilahun, Quyen To, Marcello Tonelli, Roman Topor-Madry, Miguel Tortajada-Girbés, Marcos Roberto Tovani-Palone, Bach Tran, Khanh Bao Tran, Srikanth Tripathy, Thomas Truelsen, Nikolaos Tsilimparis, Lorainne Tudor Car, Kingsley N. Ukwaja, Irfan Ullah, Muhammad Shariq Usman, Olalekan Uthman, Muthiah Vaduganathan, Afsane Vaezi, Pascual Valdez, Elena Varavikova, Santosh Varughese, Tommi Vasankari, Narayanaswamy Venketasubramanian, Santos Villafaina, Francesco S Violante, Vasiliy Vlassov, Stein Emil Vollset, Theo Vos, Kia Vosoughi, Isidora Vujcic, Fasil Wagnew, Yasir Waheed, Walson Walson, Yuan-Pang Wang, Elisabete Weiderpass, Robert Weintraub, Seifu Kebede Weldegiorgis, Andrea Werdecker, Ronny Westerman, Tissa Wijeratne, Andrea Sylvia Winkler, Charles Shey Wiysonge, Charles Wolfe, Grant Wyper, Gelin Xu, Tomohide Yamada, Yuichiro Yano, Mehdi Yaseri, Yasin Jemal Yasin, Pengpeng Ye, Alex Yeshnaeh, Manaye Yihune, Ebrahim M. Yimer, Nega Yimer, Engida Yisma, Miangotar Yode, Zemenu Yohannes, Naohiro Yonemoto, Seok-Jun Yoon, Marcel Yotebieng, Mustafa Younis, Mahmoud Yousefifard, Chuanhua Yu, Zoubida Zaidi, Sojib Bin Zaman, Mohammad Zamani, Zohreh Zare, Taddese Zerfu, and Xiu-Ju Zhao.

#### [Drafting the work or revising is critically for important intellectual content](#)

Tarek Abd Elaziz, Nasrin Abdoli, Isaac Adedeji, Olatunji Adetokunboh, Mohsen Afarideh, Sutapa Agrawal, Mohammadesmaeil Akbari, Tomi Akinyemiju, Fares Alahdab, Reza Alizadeh-Navaei, Nahla Anber, Reza Assadi, Ashish Awasthi, Peter Azzopardi, Hamid Badali, Suzanne Barker-Collo, Bernhard Baune, Masoud Behzadifar, Yihalem Abebe Belay, Adam Berman, Sait Menten Birlik, Oliver Brady, Alessandra C Goulart, Charlton Callender, Julio Cesar Campuzano, Franz Castro, Devasahayam Jesudas Christopher, Flavia Cicuttini, Cyrus Cooper, Leslie Cornaby, Ahmad Daryani, Rajat Das Gupta, Nicole Davis Weaver, Dragos Davitoiu, Jan-Walter De Neve, Selina Deiparine, Getenet Dessie, Kate Dolan, Andre Duraes, David Edvardsson, Reza Esmaeili, Sadaf Esteghamati, Kara Estep, Mohammad Hosein Farzaei, Nataliya Foigt, Morsaleh Ganji, Aregawi Gebreyesus Belay, Ayele Geleto, Ricard Genova-Maleras, Keyghobad Ghadiri, Maryam Ghasemi-Kasman, Amador Goodridge, Mehedi Hasan, Hadi Hassankhani, Akbar Hedayatzadeh-Omran, Behnam Heidari, Long Hoang Nguyen, Enayatollah Homaie Rad, Thomas Hsiao, Asnake Ararsa Irenso, Sheikh Mohammed Shariful Islam, Ravi Prakash Jha, Manoochehr Karami, Getachew Mullu Kassa, Nicholas J Kassebaum, Grant Kemp, Morteza Abdullatif Khafaie, Alireza Khajavi, Mona Khater, Daniel Kim, Yun Jin Kim, Mika Kivimaki, Dharmesh Lal, Hilton Lam, James Lee, Misgan Legesse Liben, Alan Lopez, Crispin Mabika Mabika, Azeem Majeed, Reza Malekzadeh, Mohammad Ali Mansournia, Joemer Maravilla, Francisco Rogerlândio Martins-Melo, Benjamin Massenburg, Sanjay Mehendale, Varshil Mehta, Kidanu Meles, Melkamu Merid Mengesha, Tuomo Meretoja, Molly Miller-Petrie, Karzan Mohammad, Maryam Mohammadi-Khanaposhtani, Mehdi Moradinazar, Abbas

Mosapour, Christopher Murray, Kamarul Imran Musa, Ghulam Mustafa, Paulami Naik, Nahid Neamati, Molly Nixon, Andrew T. Olagunju, Tinuke Olagunju, Hadi Parsian, David Pereira, Konrad Pesudovs, Julian Pillay, Vafa Rahimi-Movaghar, Muhammad Aziz Rahman, Chhani Lal Ranabhat, Satar Rezaei, Seyed Mohammad Riahi, Hosein Safari, Sare Safi, Saeid Safiri, Mohamadreza Salahshoor, Juan Sanabria, Milena Santric Mlicevic, Bruno Sao Jose, Muthupandian Saravanan, Shahabeddin Sarvi, Maheswar Satpathy, Hosein Shabaninejad, Katya Shackelford, Mehdi Sharif, Mika Shigematsu, Inga Dora Sigfusdottir, Rannveig Sigurvinsdottir, Dharendra Narain Sinha, Vinay Srinivasan, Vladimir Starodubov, Caitlyn Steiner, Leo Stewart, Michelle Subart, Ipsita Sutradhar, Segen Tassew, Nuno Taveira, Nu Thi Truong, Nihal Thomas, Marcos Roberto Tovani-Palone, Bach Tran, Olalekan Uthman, Elena Varavikova, Walson Walson, Yuan-Pang Wang, Robert Weintraub, Manaye Yihune, and Miangotar Yode.

#### [Extracting, cleaning, or cataloging data; designing or coding figures and tables](#)

Hedayat Abbastabar, Tarek Abd Elaziz, Ibrahim Abdollahpour, Daisy Maria Xavier Abreu, Kareha Agesa, Alireza Ahmadi, Muktar Ahmed, Syed Mohamed Aljunid, Mustafa Geleto Ansha, Seth Christopher Yaw Appiah, Nicholas Arian, Ashish Awasthi, Bayu Begashaw Bekele, Gregory Bertolacci, Muhammad Shahdaat Bin Sayeed, Sait Menten Birlik, Paul Briant, Charlton Callender, Julio Cesar Campuzano, Alanur Cavlin, Haley Comfort, Leslie Cornaby, Matthew Cunningham, Ahmad Daryani, Nikolaos Dervenis, Mengistu Desalegn Tadese, Girmaye Dinsa, Manisha Dubey, Sarah Duncan, Iqbal Elyazar, Sergey Ermakov, Hamed Fakhim, Kairsetn Fay, Takeshi Fukumoto, John Fuller, Amiran Gamkrelidze, Gbetoho Gankpe, Gregory "Manny" M Garcia, Aregawi Gebreyesus Belay, Ayele Geleto, Keyghobad Ghadiri, Jingwen Guo, Yuming Guo, Mehedi Hasan, Yihua He, Akbar Hedayatizadeh-Omran, Behzad Heibati, Nathaniel Henry, Long Hoang Nguyen, Mehdi Hosseinzadeh, Thomas Hsiao, Trang Huyen Nguyen, Chad Ikeda, Panniyammakal Jeemon, Vivekanand Jha, Manoochehr Karami, André Karch, Tesfaye Kassa, Vittal Katikireddi, Norito Kawakami, Grant Kemp, Andre Keren, Maia Kereselidze, Nauman Khalid, Mohammad Hossein Khosravi, Jun Kim, Young-Eun Kim, Yun Jin Kim, Adnan Kisa, Barthelemy Kuate Defo, Xie Rachel Kulikoff, Michael Kutz, James Lee, Misgan Legesse Liben, Shanshan Li, Shiwei Liu, Reza Malekzadeh, Mohammad Ali Mansournia, Melvin Marzan, Benjamin Massenburg, Mohsen Mazidi, Sanjay Mehendale, Saeed Mehrzadi, Hagazi Gebre Meles, Melkamu Merid Mengesha, Zerihun Menlkalew Zenebe, Ted R Miller, Mulugeta Molla, Lorenzo Monasta, Maziar Moradi-Lakeh, Rintaro Mori, Abbas Mosapour, Ghulam Mustafa, Mohsen Naghavi, Paulami Naik, Mohammad Reza Nowroozi, In-Hwan Oh, Ajay Patle, David Pereira, William Petri, Max Petzold, Huyen Phuc Do, Maxwell Pierce, Hossein Poustchi, Narayan Prasad, Caroline Purcell, Anwar Rafay, Alireza Rafiei, Fatemeh Rajati, Seyed Mohammad Riahi, Nicholas Roberts, Luca Ronfani, Enrico Rubagotti, Hosein Safari, Saeid Safiri, Payman Salamati, Abdallah M. Samy, Muthupandian Saravanan, Shahabeddin Sarvi, Maheswar Satpathy, Monika Sawhney, Kathryn Schelonka, Sadaf Sepanlou, Marina Shakhnazarova, Mehdi Sharif, Peilin Shi, Farhad Shokraneh, Soraya Siabani, Dharendra Narain Sinha, Luisa Sorio Flor, Vinay Srinivasan, Leo Stewart, Michelle Subart, Patrick Sur, Ipsita Sutradhar, Dillon Sylte, Cassandra Szoeki, Nu Thi Truong, Anna Torre, Miguel Tortajada-Girbés, Bach Tran, Kingsley N. Ukwaja, Irfan Ullah, Gaurang Vaidya, Tommi Vasankari, Inbal Weiss Salz, Mehdi Yaseri, Nega Yimer, Naohiro Yonemoto, Seok-Jun Yoon, Stephanie Zimsen, and Leo Zoekler.

#### [Managing the overall research enterprise](#)

Ashkan Afshin, Peter Allebeck, Elizabeth Cromwell, Lalit Dandona, Rakhi Dandona, Louisa Degenhardt, Samath Dharmaratne, Daniel Dicker, Charbel EL Bcheraoui, Kara Estep, Tamer Farag, Valery Feigin, Kyle Foreman, Nancy Fullman, Emmanuela Gakidou, Tsegaye Gebrehiwot, Simon Hay, Spencer James, Nicholas Kassebaum, Ibrahim Khalil, Kris Krohn, Xiaofeng Liang, Stephen Lim, Alan Lopez, Rafael Lozano,

Felix Masiye, George Mensah, Molly Miller-Petrie, Awoke Misganaw, Ali Mokdad, Kate Muller, Christopher Murray, Mohsen Naghavi, Molly Nixon, David Pigott, Robert Reiner, Joseph Salama, Joshua A Salomon, Benn Sartorius, Katya Shackelford, Caitlyn Steiner, Roman Topor-Madry, Stein Emil Vollset, Theo Vos, Andrea Werdecker, and Harvey Whiteford.

[Did not provide contribution information](#)

Dash A P, Berrak Bora Basara, Jacqueline Castillo Rivas, Leslie Cooper, Tamirat Dasa, Maryam S. Farvid, Mohammad Rasoul Ghadami, Vladimir Hachinski, Alexis Handal, Oluwaseyi Isehunwa, John Ji, Behzad Karami Matin, Ali Kazemi Karyani, Arman Latifi, Yirga Legesse, Ana Laura Manda, Wagner Marcenes, Gk Mini, Noushin Mohammadifard, Satinath Mukhopadhyay, GVS Murthy, Abhijit Pakhare, Achyut Raj Pandey, Emmanuel Peprah, Sahar Saeedi Moghaddam, Nizal Sarrafzadegan, Araad Shakir, Reza Shirkoohi, Karen Sliwa, Joan B Soriano, Amanuel T. Tsegay, Selen Uzun, Yohanes Ayele Wondimkun, Gokalp Yentur, and Paul Yip.

## Section 1. GBD Overview

### Section 1.1. Geographic Units of the Analysis

The locations included in GBD 2017 have been arranged into a set of hierarchical categories composed of seven super-regions and a further nested set of 21 regions containing 195 countries and territories (Appendix Table 1). Subnational estimation in GBD 2017 includes Brazil, China, India, Indonesia, Japan, Kenya, Mexico, South Africa, Sweden, the United Kingdom, and the United States, and new subnational assessments at the administrative one level for Ethiopia, Iran, Norway, and Russia and by Maori ethnicity for New Zealand. Subnational 2017 GBD data will be released at a future time.

### Section 1.2. Time Periods of the Analysis

A complete set of population and fertility numbers and rates were computed explicitly for the following years: 1950-2017.

Data and underlying code used for this analysis are available at <http://ghdx.healthdata.org/gbd-2017>. Results for all GBD metrics are available at <http://www.healthdata.org/results/data-visualizations>.

### Section 1.3. Statement of GATHER Compliance

This study complies with the Guidelines for Accurate and Transparent Health Estimates Reporting (GATHER) recommendations. We have documented the steps involved in our analytical procedures and detailed the data sources. See Appendix Table 2 for GATHER checklist.

### Section 1.4. List of Abbreviations

ASFR: age-specific fertility rate

CBH: complete birth history

CCMPP: cohort component method of population projection

CEB: children ever born

DALY: disability-adjusted life-year

DHS: Demographic and Health Surveys

DYB: Demographic Yearbook

EDU15+: mean education for those aged 15 and older

GATHER: Guidelines for Accurate and Transparent Health Estimates Reporting

GBD: Global Burden of Disease

GHDx: Global Health Data Exchange

GLMM: Gulf Labour Markets, Migration and Population

GPR: Gaussian process regression

HDI: Human Development Index

HFC: Human Fertility Collection

HMD: Human Mortality Database  
IPUMS: Integrated Public Use Microdata Series  
LDI: lag-distributed income per capita  
LSMS: Living Standards and Measurement Surveys  
MICS: Multiple Indicator Cluster Surveys  
MPIDR: Max Planck Institute for Demographic Research  
PES: post-enumeration survey  
RHS: Reproductive Health Surveys  
SBH: summary birth history  
SDI: Socio-demographic Index  
SRS: Sample Registration System  
ST-GPR: Spatiotemporal Gaussian process regression  
TFR: total fertility rate  
TFO30: total fertility over age 30  
TFU25: total fertility up to age 25  
TMB: template model builder  
UN: United Nations  
UNHCR: United National High Commissioner for Refugees  
UNPOP: United Nations Population Division  
UNSTAT: United Nations Statistical Commission  
VR: vital registration  
WFS: World Fertility Surveys  
WPP: World Population Prospects  
YLD: years lived with disability  
YLL: years of life lost

## Section 1.5. GBD results overview

Results from the Global Burden of Disease Study (GBD) are now measured in terabytes. Results are available in an interactive data downloading tool on the Global Health Data exchange (GHDx). In the GBD 2017 version, the GHDx tool also contains measures such as prevalence and incidence as well as rate of change data. Data above a certain size cannot be viewed online but can be downloaded. Depending on the size of the download, users may need to enter an email address; a download location will be sent to them when the files are prepared.

The current version of the data download tool is available in the GHDx and contains core summary results for GBD 2017: <http://ghdx.healthdata.org/gbd-results-tool>. The core summary results include deaths, years of life lost (YLLs), years lived with disability (YLDs), and disability-adjusted life-years (DALYs). The GHDx includes data for causes, risks, cause-risk attribution, aetiologies, and impairments.



## Section 1.6. Data input sources overview

GBD 2017 incorporated a large number and wide variety of input sources to estimate mortality, population, fertility, causes of death and illness, and risk factors for 195 countries and territories from 1990 to 2017. These input sources are accessible through an interactive citation tool available in the GHDx. Users can retrieve citations for a specific GBD component, cause or risk, and geography by choosing from the available selection boxes. They can then view and access GHDx records for input sources and export a CSV file that includes the GHDx metadata, citations, and information about where the data were used in GBD. Additional metadata for each input source are available through the citation tool, as required by the GATHER statement.

The citation tool is accessible through the GHDx at <http://ghdx.healthdata.org/gbd-2017>

## Section 1.7. Funding Sources

Research reported in this publication was supported by the Bill & Melinda Gates Foundation, the National Institute on Aging of the National Institutes of Health (award P30AG047845), and the National Institute of Mental Health of the National Institutes of Health (award R01MH110163). The content is solely the responsibility of the authors and does not necessarily represent the official views of the Bill & Melinda Gates Foundation or the National Institutes of Health.

## Section 2. Population and Fertility Estimation Process

### Section 2.1. Overview

Previous GBD cycles have produced total fertility rate estimates accompanied by age-specific, single-year mortality estimates.<sup>1,2</sup> Previous GBD analyses incorporated population estimates produced by the United Nations Population Division<sup>3</sup> and the Human Mortality Database (HMD);<sup>4</sup> however, these population estimates were not consistent with GBD mortality estimates. This discrepancy was especially pronounced in older age groups and in countries without high-quality vital and civil registration systems. The goal of the GBD 2017 population and fertility estimation process is to produce internally consistent fertility, mortality, and population estimates.

If all countries had complete and accurate civil registration systems, estimating age-specific population and fertility would be a straightforward task. However, countries at lower sociodemographic levels often have incomplete information systems, and multiple sources must be used to create estimates. The analytical process to produce these estimates is outlined in Appendix Figure 1. Further details are provided below for each step in the population and fertility estimation process. Details on the mortality estimation process are provided in a separate manuscript.<sup>5</sup>

## Section 2.2. Fertility

### *Overview*

For iterations of GBD through 2015 we utilised UN WPP fertility estimates for all available national locations.<sup>1</sup> For GBD 2016, we estimated total fertility rate (TFR) based on a systematic synthesis of all available data for all GBD 2016 locations and used the age-specific fertility pattern from WPP.<sup>2</sup> For the GBD 2017 cycle, we expanded our previous work by estimating age-specific fertility rates for ages 10 to 54 years of age based on a systematic synthesis of all available data for each GBD location. TFR was computed as a function of the age-specific fertility rates.

### Section 2.2.1 Data Sources

We used three primary source types for the fertility analysis: (1) the number of live births by age of mother reported through vital registration (VR) systems; (2) complete birth histories (CBH); and (3) summary birth histories (SBH). In total, we compiled 9548 unique country-source-years of data for women aged 10 to 54 for the 1950–2017 period. Including additional data generated from post-processing of CBH and SBH, this number grows to 15,309 unique country-years. Numbers of sources by location and year are provided in Appendix Table 3 and Appendix Table 4, respectively. Below we present a brief description of each of these source types and the results of data synthesis.

#### *Fertility Data Source Types*

Accurate and complete registration data of live births by age of the mother are typically regarded as the gold standard source of information on fertility; in theory, these regular (usually annual) reports should capture all births in a given country or subnational unit within a given year. High-income countries tended to have high-quality VR systems that contained the date and location of the birth, as well as detailed demographic characteristics of the mother and the date and location of birth. In lower-income countries, however, birth registration systems tended to suffer from interrupted and/or delayed reporting and incomplete coverage. Birth registries provided almost all of the fertility information pertaining to women aged 10-14 and 50-54, as the overwhelming majority of household surveys only collected birth histories from women aged 15-49 at the time of survey.

In cases where the completeness and quality of birth registration data were poor, we relied heavily on other types of data sources (namely household surveys and censuses) to triangulate the level and age-pattern of fertility. Fertility information in household surveys and censuses was predominantly in two forms – complete birth histories (CBH) and summary birth histories (SBH). CBHs, which grew to prominence with the World Fertility Surveys (WFS) administered in the 1970s and 1980s, collected information about a surveyed mother's date of birth, as well as the dates of birth and death of all children she can recall bearing in her lifetime. Since each birth could be linked to the time of birth and the mother's concurrent age, this permitted the calculation of period and age-specific fertility rates in the years prior to the survey under assumptions of no survivor, migrant, or recall bias. Many major survey programs contain CBH modules, including the Demographic and Health Surveys (DHS), Multiple Indicator Cluster Surveys (MICS), and the Reproductive Health Surveys (RHS).

SBHs, on the other hand, collected no information about the dates of birth of children, but instead only recorded the total number of children ever born (CEB) to a woman over her lifetime. Also collected is the mother's date of birth or age at the time of interview. These data provided valuable information about the overall level of fertility experienced by cohorts over time but could not be used by themselves to estimate period and age-specific fertility. Using assumptions similar to CBH (no survivor or migrant bias), cohort age patterns of fertility derived from other data sources could be used to split CEB information into period age-specific fertility rates. Availability of SBHs far surpassed that of CBHs, largely due to their relative simplicity but also their precedence. CEB questions have been featured in censuses since the turn of the 20<sup>th</sup> century and thus comprise a large share of information about fertility in low-income settings prior to the mid 1970s. In addition to censuses, a number of other survey families featured SBH, including a subset of MICS, the Living Standards and Measurement Surveys (LSMS), and a variety of country-specific surveys.

### *Fertility Data Identification and Synthesis*

Registry data were identified through the UN Demographic Yearbook (DYB; UN Statistical Division [UNSTAT]),<sup>6</sup> the Human Fertility Collection (HFC); Max Planck Institute for Demographic Research (MPIDR),<sup>7</sup> the WHO mortality database, official publications, online data portals of national statistical offices, and international collaborators. The DYB and HFC compile registry-based fertility data as reported by national statistical offices and country research institutes. DYB reports of live births by age of mother were extracted for every year available from 1948, and the complete set of age-specific HFC data were downloaded in October 2017. Estimates provided to HFC by individual researchers were excluded from our analyses (ie, we incorporated only empirical data, per MPIDR's source categorisations); country-year-ages already covered by the DYB were also excluded. We also extracted data from sample registration systems (SRS) typical of South Asian countries, including India, Pakistan, and Bangladesh. In total, we compiled 7,817 unique country-source-years of VR data, with 2,421 of them coming prior to 1970 and 1,755 of them coming after 2000. We included 31 unique country-source-years of data from SRS, the majority of which cover India.

Fertility data from household surveys and censuses were initially identified using the Global Health Data Exchange (GHDx). Records classified as "survey" or "census" and that contained any of the keywords "complete birth history," "summary birth history," or "fertility" were then compiled and reviewed by research team members to verify that they contained sufficient detail for inclusion in GBD analysis. Additional seeking was conducted for identified gaps in data, primarily through country statistical office websites as well as major survey families such as DHS, MICS, WFS, and RHS. In cases where sufficiently detailed data were not publicly available, in-country collaborators assisted in its procurement. Fertility data from the 1950s and 1960s in low-income settings (particularly sub-Saharan Africa) were specifically sought in colonial censuses containing SBH information. Where sources provided microdata, we standardised and processed CBHs to compute period age-specific fertility rates (ASFR) every three years over a 15-year recall and collapsed SBHs to tabulations of average children ever born by mother's age to be later split by cohort age patterns from the first modelling stage (see Section 2.2.2 for further details). Where microdata were unavailable, we extracted period ASFRs or average CEB by mother's age as documented in reports or other publications. In total, we extracted and processed 429 CBHs and 977

SBHs, out of 4,259 identified surveys and censuses. Occasionally, the recall type of a survey for which tabulated period ASFRs were available was unable to be identified from the report or available documentation. These accounted for only 81 country-source-years. Detailed information about the nature and quantity of identified sources in this analysis can be found in Appendix Tables 3 and 4.

## Section 2.2.2 Modelling strategy

### *Age-specific fertility rate estimation*

Using all the data described above, we estimated age-specific fertility rates by five-year age groups from ages 10 to 54 years in two broad steps. First, we estimated age-specific fertility rates for 15 to 49 years of age using spatiotemporal Gaussian process regression (ST-GPR). Next, we estimated fertility rates for 10- to 14-year-olds as a function of estimated fertility in 15- to 19-year-olds and fertility rates for 50- to 54-year-olds as a function of estimated fertility in 45- to 49-year-olds. The sections below provide further estimation process details. Summary metrics of fertility, including TFR, total fertility up to age 25 (TFU25) and total fertility over age 30 (TFO30) were computed as a function of the relevant age-specific fertility rates.

### *Age-specific fertility rate estimation for 15 to 49 years*

ASFR for age groups 15-19, 20-24, 25-29, 30-34, 35-39, 40-44, and 45-49 were estimated using ST-GPR, which has been covered in detail elsewhere.<sup>1,2</sup> The estimation of ASFR involved the following sequential steps: (1) Estimation of ASFR 20-24 using age-specific data from CBH and VR and using mean years of education in 20- to 24-year-olds as a predictor; (2) Estimation of ASFR for the remaining age groups using age-specific data from CBH and VR and using age-specific mean years of education and estimated ASFR 20-24; (3) Split SBH data by age and period using the estimated location, time and age-specific estimates of ASFR; (iv) Re-estimate ASFR 20-24 using CBH, VR, and the period-age-split SBH data; and (v) Re-estimate ASFR using CBH, VR, and the period-age-split SBH data.

The ST-GPR models for ASFR were implemented as follows. The first stage mixed effect regression was fit in bounded logit space:

$$\text{Logit} \left( \frac{\text{ASFR data} - \text{lower bound}_{age}}{\text{upper bound}_{age} - \text{lower bound}_{age}} \right)$$

The lower bound was the minimum fertility by age across time and geography, and the upper bound was the 99.3 percentile of fertility by age across time and geography, after dropping implausibly high ASFRs above 0.5. This upper bound on ASFR data produced an implied maximum TFR of 10.5.

The specifications of the mixed effects regression are below.

$$\text{logit}_{\text{bound}}(\text{ASFR}_{20-24}) = \beta_1 + \beta_2 * \text{female education}_{c,y} + \gamma_{\text{locsource}}$$

$$\text{logit}_{\text{bound}}(\text{ASFR}_{n-n+5}) = \beta_1 + \beta_2 * \text{female education}_{c,y} + \text{spline}(\text{ASFR}_{20-24,c,y}) + \gamma_{\text{locsource}}$$

Where  $n$  is between 25 and 45,  $\beta_1$  is the intercept,  $\beta_2$  is the coefficient on female education, female education and the ASFR 20-24 estimates are specific by country and year, and  $\gamma_{locsource}$  is a location-source random intercept.

In the age groups other than 20-24, female education was not used as a covariate in high-income locations. Separate models were fit for high-income, sub-Saharan Africa, Central Europe, Eastern Europe, and Central Asia to account for the differences in the relationships between ASFR 20-24 and the other age groups. The knots in the linear spline (in logit space) chosen by age group and super-region are shown in Table A.

*Table A: Knots on ASFR 20-24*

| Region                                           | Age | Knot  |
|--------------------------------------------------|-----|-------|
| Central Europe, Eastern Europe, and Central Asia | 15  | NA    |
| Central Europe, Eastern Europe, and Central Asia | 25  | -1.5  |
| Central Europe, Eastern Europe, and Central Asia | 30  | -2    |
| Central Europe, Eastern Europe, and Central Asia | 35  | -1.75 |
| Central Europe, Eastern Europe, and Central Asia | 40  | -1.75 |
| Central Europe, Eastern Europe, and Central Asia | 45  | -2    |
| High-income                                      | 15  | NA    |
| High-income                                      | 25  | NA    |
| High-income                                      | 30  | -2.25 |
| High-income                                      | 35  | -2    |
| High-income                                      | 40  | -2.25 |
| High-income                                      | 45  | -2.25 |
| Others                                           | 15  | NA    |
| Others                                           | 25  | -1.5  |
| Others                                           | 30  | -1.3  |
| Others                                           | 35  | -1.3  |
| Others                                           | 40  | -2    |
| Others                                           | 45  | -2.5  |
| Sub-Saharan Africa                               | 15  | NA    |
| Sub-Saharan Africa                               | 25  | -1.75 |
| Sub-Saharan Africa                               | 30  | -1.25 |
| Sub-Saharan Africa                               | 35  | -1.3  |
| Sub-Saharan Africa                               | 40  | -1.5  |
| Sub-Saharan Africa                               | 45  | -1.75 |

We outliered the following categories of data: (1) implausibly high ASFR, defined as an ASFR over 0.5; (2) 0 values due to sampling error, especially in age group 45-49; (3) data with known undercounting of

births, when no other sources could be used to adjust data; and (4) an implausible level or trend as compared to more robust complete VR or CBH sources.

### *Data Source Adjustment*

After the mixed-effects model was computed, the random intercept on the concatenation of location and source was used to adjust data to a reference or standard source. The adjustment factor was the sum of the difference between the reference source fixed and random effects, and the fixed and random effects on the data point for the specific source, as below, and was then added to the data to derive an adjusted value.

$$\text{Adjustment Factor} = (\text{Location Source } RE_{ref} - \text{Location Source } RE_{data\ point})$$

Where RE represents a random intercept of either a reference source or a data-point specific location-source. When more than one reference source was selected in a single location, the values of the location source random effects for each reference source were averaged to produce the first term of the equation.

Reference sources were initially chosen as: (1) complete VR for locations with complete VR, (2) an average of complete birth history sources for locations with one or more complete birth history, (3) and agnostically (as an average of all the sources for each location) for locations with neither complete VR nor complete birth histories. VR was designated as complete for a country if the median of child death registration completeness for the location over all available years was over 95%.<sup>5</sup> For some locations, reference sources were chosen based on expert judgement. For example, data from past censuses (1950s and 1960s) in sub-Saharan Africa were often chosen as reference sources to accurately capture the depressed fertility during that time period.

### *Hyper-parameter Selection*

The residual smoothing and GPR stages of ST-GPR were implemented using the output of the mixed effects regression and data source adjustments. Hyper-parameters for the residual smoothing and GPR stages were chosen based on a location- and age-specific data density score. For locations with VR, the VR component of the score was calculated as the sum of the years for which VR data were available, and then down-weighted if the number of births in the age group was less than 100. Incomplete VR was down-weighted by 0.5. For non-VR sources, the number of sources was counted instead of the number of years. For example, one DHS survey would count as one source, even if it contributed more than one data point.

The data density score was calculated as follows:

$$\begin{aligned} DD\ Score_{loc,age} &= \text{Complete VR years}_{loc,age} + (2 * \text{Number CBH Sources}_{loc,age}) \\ &+ (0.25 * \text{Number SBH sources}_{loc,age}) + (0.5 * \text{Incomplete VR years}_{loc,age}) \\ &+ \text{Number Other Sources}_{loc,age} \end{aligned}$$

Where *DD* stands for data density, *CBH* is complete birth history, *SBH* is summary birth history, and all elements of the equation incorporate year and age.

ST-GPR hyper-parameters  $\lambda$ ,  $\xi$ , and scale were designated by categories of data density, as shown in Table B below.

*Table B: Hyper-parameter Values by Data Density*

| Data density      | Lambda | Zeta | Scale |
|-------------------|--------|------|-------|
| Over 50           | 0.2    | 0.99 | 5     |
| Between 30 and 50 | 0.4    | 0.9  | 10    |
| Between 20 and 30 | 0.6    | 0.8  | 15    |
| Between 10 and 20 | 0.8    | 0.7  | 15    |
| Under 10          | 1      | 0.6  | 15    |

For non-complete VR sources, data variance was calculated as the variance between the spatiotemporal prediction and the unadjusted data. For location-ages with fewer than five data points, the maximum data variance in the associated GBD region was used. For complete VR sources, we assumed that non-sampling variance was 0 and calculated sampling variance using the binomial equation shown below:

$$\text{Sampling Variance} = \frac{ASFR * (1 - ASFR)}{Births}$$

To calculate amplitude, we computed the mean of the location-specific standard deviation of the difference between the first-stage mixed-effect regression and the second-stage spatiotemporal smoothing, restricted to national locations with a data density score of over 50 in the years between 1990 to 2017. This amplitude was applied to all locations.

### *SBH Methods*

SBHs that collected CEB data were more frequently available at early time points than CBHs. For example, questions about CEB were often included in early colonial censuses in Africa. Multiple techniques exist to compute period- and age-specific fertility from SBH information, the most widely used of which is the Brass Parity/Fertility ratio method. This method assumes, however, that age-specific fertility remains constant over time. To relax this assumption, we used the estimates of age-specific fertility based on all available CBH and registry data from the first full run-through of ST-GPR described above – which provided a dynamic measure of cohort age patterns over time – to split SBH into period – ASFR. From the SBH-naïve estimates, we first calculated implied annualised fertility for all five-year birth cohorts represented in a given SBH from age 10 up until either age 54 or the year of survey, whichever came sooner. Because ST-GPR only produces annual estimates for five-year age groups, in doing so we needed to account for fertility experienced in years where some proportion of them had graduated into the next five-year age group. To do this, we computed the weighted average of the estimated ASFRs in the lower and upper bounding age groups as the fertility experienced by that hypothetical cohort in that year, assuming a uniform age distribution within the group. For example, for a cohort of women aged 15 to 19

in 1971 with ASFR  $F$ , we compute the ASFR experienced by this cohort as women aged 16-20 in 1972 as  $.8 * {}_5F_{15}^{1971} + .2 * {}_5F_{20}^{1976}$ , since 20% of this cohort has now aged into the 20-24 group.

From our implied annualised cohort ASFR, we then calculated cumulative cohort fertility up to age of each cohort at the time of survey. On a cohort-by-cohort basis this measure of implied cumulative fertility was compared to the observed cumulative fertility (average CEB from SBH) to derive a scaling factor. We applied this scaling factor to the original implied cohort age pattern to distribute CEB back across time and age. Our method of utilising SBH only covered birth cohorts between 1940 (who began to experience ASFR 10-14 in 1950 at the beginning of our estimation period) and 2007 (who began to experience ASFR 10-14 in 2017 at the end of our estimation period).

#### *Splitting of total birth and historic location aggregate data*

Analogous to the cumulative cohort fertility provided by SBH, a large amount of data were only available as age aggregates (eg, total live births, rather than by mother's age) and/or location aggregates (eg, former USSR prior to its dissolution). In these situations, we split these data using the age and location proportions informed by the first ST-GPR run-through using only CBH and registry data. Once these data were split, we reran the entire estimation process described above, incorporating all CBH, registry data, period and age-split SBH data, and location and age-split miscellany. This approach provided additional information about aggregate levels of fertility over time and represented a large increase in the availability of past data.

#### *Age-specific fertility rate estimation for 10- to 14-year-olds and 50- to 54-year-olds*

ASFR for 10-14 and 50- to 54-year-olds was estimated separately, given the paucity of the data for those age groups in any locations without a vital registration system. In both models, we leverage the relationship between ASFR in one age group and the neighbouring age group. In age 10-14, we ran a mixed effects regression on the log of the ratio of ASFR 10-14 over ASFR 15-19, and used ASFR 15-19 as a predictor along with nested random intercepts by super-region, region, and location, as follows:

$$\log\left(\frac{ASFR\ 10 - 14}{ASFR\ 15 - 19}\right) = \beta_1 + \beta_2 \log(ASFR\ 15 - 19) + \gamma_{sr} + \gamma_r + \gamma_{loc}$$

Where  $\beta_1$  is the intercept and  $\gamma_{sr}$ ,  $\gamma_r$ , and  $\gamma_{loc}$  are nested super-region, region, and location random intercepts.

For ASFR 50-54, we did not observe a clear relationship between the log ratio of ASFR 50-54 over ASFR 45-49 and ASFR 45-49. Instead, we estimated a regression on this ratio with a constant. We computed uncertainty by generating 1,000 draws from the variance-covariance matrix from the regression.

#### *Fertility metrics*

TFR was calculated as the time-weighted sum of the ASFRs; in our case, this was the sum of ASFR 10-14, 15-19, 20-24, 25-29, 30-34, 35-39, 40-44, 45-49, and 50-54 multiplied by the 5 years spent in each age



bin. TFU25 and TFO30 were calculated equivalently, with TFU25 being the sum of ASFR 10-14, 15-19, and 20-24 multiplied by the 5 years in each age bin, and TFO30 being the sum of ASFR 30-34, 35-39, 40-44, 45-49, and 50-54 multiplied by the 5 years in each age bin. Live births were calculated as the sum of ASFR multiplied by the age specific female population from the population model, described below in Section 2.3.

### *Estimation of education as a covariate*

Estimates of average years of education were based on a compilation of 2,522 censuses and household surveys. These data and the methods hereafter build on an approach used to produce a previously published dataset of international educational attainment.<sup>8</sup> Each data source included information on the distribution of educational attainment by country, year, sex, and five- or ten-year age group. Where years of schooling data were available only for multi-year bins, eg, the fraction of the population with between six and nine years of completed education, we utilised a database of 1,792 sources reporting single years of completed schooling to split these binned data into single-year distributions from 0 to 18 years based on the average of the 12 closest distributions in terms of geographic proximity and year. From each of the subsequent data sources, we calculated the mean years of schooling by age and sex.

In the next step, age-cohort imputation was used to project observed cohorts through time, exploiting the relative constancy of education levels after age 25. For any data point representing a cohort aged 25 or older, we extrapolated the data forward and backward so that it was represented in all year-age combinations for that cohort. For example, a data point reflecting a cohort aged 35-39 in 2000 was projected forward for 40- to 44-year-olds in 2005, 45- to 49-year-olds in 2010, and so on. It was also projected backward for 30- to 34-year-olds in 1995 and 25- to 29-year-olds in 1990. Post-imputation, age-period models were fit on all original input data, as well as the imputed cohort data, in order to estimate a complete single-year series of educational attainment from 1950 through 2016 by age, sex, and location. Separately for each sex and GBD region, the mean level of educational attainment of the country-age-year-specific population,  $Edu_{c,a,s,t}$ , was estimated as:

$$\text{logit} \left( \frac{Edu_{c,a,s,t}}{Edu_{max_a}} \right) = \beta_{s,r} Year + \delta_{s,r} Age + I_{s,r} + \alpha_{c,s},$$

where:

$Edu_{max_a}$  is the maximum mean educational attainment for each age group, defined as 3 for ages 5-9, 8 for ages 10-14, 13 for ages 15-19, and 18 for all age groups 20-24 and up;

$\beta_{s,r}$  is a sex- and region-specific intercept;

$\delta_{s,r}$  captures the linear secular trend for each sex and region;

$I_{s,r}$  is a natural spline on age to capture the non-linear age pattern by sex and region, with knots at 15 and 25 years of age; and

$\alpha_{c,s}$  is a country-sex-specific random intercept.

Finally, Gaussian process regression (GPR) was used to smooth the residuals from the age-period model, accounting for uncertainty in each data point. GPR also synthesises both data and model uncertainty to estimate uncertainty intervals.

### Section 2.2.3 Sex Ratio at Birth

#### *Overview*

Another key component of population dynamics is the sex ratio at birth (SRB), as it has major implications for both future population structure and overall reproductive capacity. As such, SRB is a critical component for CCMPP and its variants. For the GBD analysis, we defined SRB as the ratio of total male to total female live births in a given calendar year. Some other publications such as the India SRS report the reciprocal.

The natural equilibrium for SRB generally hovers around 1.05 males per female, with some country-specific deviations.<sup>9</sup> Prior to the advent of ultrasound technologies and feasibility of sex-selective abortion, SRB remained stable over time. Since this period, however, remarkable shifts in SRB have manifested through systematic sex preferences for children, especially in the Caucasus, South Asia, and East Asia. To capture both historic equilibria and recent shifts, we developed a model to estimate SRB in all national GBD locations, Hong Kong, and Macau from 1950 to 2017.

#### *Data Sources*

As with estimation of fertility, registered live births by sex are the gold standard source for deriving SRB; however, their quality in some settings may suffer from sex-differentials in registration or reporting. We extracted total live births by sex from all UN DYB reports back to 1950 and the most recent update to the WHO mortality database. Where VR data are poor or nonexistent, precedent exists to use other source types of SRB, including surveys, censuses, and population registries.<sup>10</sup> To supplement registered births, we extracted sex ratios from all complete birth histories identified for the fertility analysis using a 25-year recall and averaging over five-year windows. We also extracted under-1 counts by sex from censuses and population registries, and where the former were unavailable, under-5 census counts by sex from censuses and population registries. For India and China, respectively, where there have been documented periods of male preference but poor registry data, we utilised information available from the SRS and 1% Population Sample Survey. In total, we extracted 4690 unique location years of registered births by sex, 1457 of under-1 counts by sex and 299 of under-5 counts by sex from censuses and population registries, and 2490 unique location-years from 446 complete birth histories.

#### *Modelling Approach*

We estimated time trends in SRB using the GBD ST-GPR framework. Data variance for all source types was calculated using a binomial distributional assumption. We then specified a linear prior for the mean as follows:

$$\text{logit}(m_{ly}) = \alpha_r + \epsilon_{ly}$$

$$\alpha_r \sim N(\gamma_{sr}, \sigma_\alpha^2)$$

$$\gamma_{sr} \sim N(0, \sigma_\gamma^2)$$

Where  $m_{ly}$  is the proportion of live births that are male in location  $l$  and year  $y$  and  $\gamma_{sr}$  and  $\alpha_r$  are nested random intercepts by GBD super-region and region. We chose to model the proportion of male live births in lieu of the mathematically equivalent SRB to take advantage of the stability of estimation in transformed logit space. Additionally, we used a flat prior, as we would not expect SRB to change over time except in clear cases of sex-preference. We refined this prior with spatiotemporal smoothing and subsequently passed it to the GPR to generate final estimates of mean SRB. Hyperparameters for spatiotemporal smoothing and GPR for a location  $l$  were chosen on the basis of a data density score derived as follows:

$$dd_l = .5 * sourceYears_{l,CBH} + sourceYears_{l,CENSUS} + sourceYears_{l,VR}$$

We down-weighted CBH relative to other source types due to the comparative magnitude of noise in the data apparent as a result of smaller sample sizes. Score thresholds for hyperparameter selection were chosen from their empirical distribution. Expert judgement was used to override automated hyperparameter selection, mostly in countries with small populations and medium data density. In these cases, we took a more conservative estimation approach since small denominators introduced additional volatility in the data.

*Table C: Hyper-parameter Values by Data Density for Sex Ratio at Birth*

| Density Category<br>(dd score range) | $\zeta$ | $\lambda$ | GPR Scale |
|--------------------------------------|---------|-----------|-----------|
| Low (0 -10)                          | .05     | .04       | 20        |
| Medium (10.5 – 30)                   | .025    | .15       | 10        |
| High (30+)                           | .01     | .25       | 10        |

Due to the scope of additional data seeking and extraction, we did not extend this analysis to subnational units for GBD 2017; instead, we assume subnational SRB to equal that of the national. For future cycles, estimation will cover all GBD locations.

## Section 2.3 Population

### *Overview*

The demographic balancing equation defines how a population ( $N$ ) changes from one time point to another.

$$N(T) = N(0) + B[0, T] - D[0, T] + I[0, T] - O[0, T]$$

People can only enter a population through birth (B) or immigration (I) and exit through death (D) or emigration (O). For this analysis we collapse immigration and emigration into net migration (G) where a positive value indicates net immigration and a negative value indicates net emigration.

$$N(T) = N(0) + B[0, T] - D[0, T] + G[0, T]$$

In order to estimate population size over a period of time we need to know the initial size of the population and how many people are entering and leaving the population through births, deaths, and migration. In short, the Bayesian population model used in this study reconciles GBD estimates of fertility and mortality with data on population size obtained through population censuses and registries. We will first describe each of the data sources used as inputs to the model and then describe the actual modelling process used to estimate migration and population. The calculated GBD world population standard is shown in Appendix Table 6.

### Section 2.3.1 Data sources and processing

#### *Census and registry lists*

Population censuses, conducted in most countries usually every ten years, are the primary source of data on population size by age and sex. In some countries continuous population registries are also maintained. We synthesised population census data by first compiling a list of censuses as documented by UNSTAT,<sup>11</sup> UNPOP,<sup>3</sup> UN DYB,<sup>6</sup> IPUMS,<sup>12</sup> and the Population Research Center at The University of Texas at Austin.<sup>13</sup> This compiled list is shown in appendix table 3; we also show all censuses and registries found for each country in Appendix Figure 2. A list of all confirmed censuses is included in Appendix Table 5.

#### *Population data extraction*

We extracted age-and-sex-specific population census and registry counts from the UN DYB,<sup>6</sup> IPUMS,<sup>12</sup> national statistic websites, and by searching the WorldCat catalog.<sup>14</sup> In several cases, multiple sources of population counts were available for a given census or registry-year. Preference was given to registry over census data, data for which population counts were reported de facto (people were counted based on place of enumeration) rather than de jure (people were counted based on place of usual residence), and data reporting population counts by more detailed age-and-sex groups. In some instances, detailed population count data by age and sex were only provided for a random sample of the total census population (ranging from 1% to 20% of the full census). In these cases, we assumed that the age and sex structure found in the sub-sample was the same as that for the total census, and the sub-sample counts were scaled up using the total census population counts.

In total, we extracted data for 1240 censuses out of 1249 censuses known to have occurred. The nine unextracted censuses included those that were never released by the coordinating organization. Of the censuses extracted, 635 were de facto, 547 were de jure, and for 58 we were unable to determine whether the data were de facto or de jure. In total we extracted 756 location-years of registry data for 26 locations.

We also noted any published limitations of the census, including both limitations provided by the country’s statistical division upon publication of the results and limitations identified by media and independent experts. In some excluded censuses, countries may have artificially inflated population counts or undercounted minorities for political reasons. Other censuses were excluded because they failed to enumerate the non-white population (ie, Rwanda 1953, Burundi 1952 and 1958). We excluded 75 censuses that were representative of only a population subset or utilised questionable methods; 20 censuses were excluded because they were inconsistent with adjacent data.

### *Population data processing*

Population data, as initially extracted, could be inaccurate due to age misreporting, representativeness of the de facto population, and under/overenumeration. In identifying census data, we preferentially utilised raw census and registry population counts and applied a standardised set of methods to correct for these issues.

The first step was to distribute counts of individuals for whom age and/or sex were unknown. We used the age-sex structure of the remainder of the data from that particular census to distribute the counts of this group of individuals.

The second step was to adjust for age heaping that occurred when individuals reported their age as a round number (most often ending in 0 or 5) rather than their exact age. Population totals were first aggregated to the largest age interval length originally present in the data so that each population count was in standard-sized age groups and the 26 censuses that had unusually wide age groups were collapsed to total population by sex only. For each census we calculated the sex ratio score, age ratio score for males and females, and the joint score (JS); these measures are explained in detail in the US Census Bureau Population Analysis System documentation.<sup>15</sup>

Many age heaping corrections methods have been developed, and we use a combination of three for this analysis. The Feeney correction is applicable to census counts in single-year age groups and redistributes people reporting their age as a multiple of five to the eight adjacent single-year age groups so that the corrected counts in the adjacent age groups are proportional to the original counts and so that the corrected count and the eight adjacent age groups form a linear progression; the corrected counts are then reported in five-year age groups. The Arriaga correction takes as input census counts in five-year age groups and smooths by combining the three nearest ten-year age groups with a second-degree polynomial, the advantage of this technique over similar methods is that it also smooths the youngest and oldest age groups. The Arriaga strong method addresses more severe age misreporting by averaging three consecutive 10-year age groups. These three methods were used in countries outside of high-income and Central Europe, Eastern Europe, and Central Asia according to the following rules based on the age group length of the population counts and the JS.

*Table D: Age heaping corrections*

| Age group length | Joint score (JS) | Age heaping correction |
|------------------|------------------|------------------------|
| 1                | JS ≤ 20          | None                   |

|                  |               |                |
|------------------|---------------|----------------|
| 1                | JS > 20       | Feeney         |
| 5                | JS <= 20      | None           |
| 5                | 20 < JS <= 40 | Arriaga        |
| 5                | JS > 40       | Arriaga strong |
| 10               | JS <= 20      | None           |
| 10               | JS > 20       | Arriaga strong |
| Total population | Not available | None           |

33 censuses were identified via visual inspection as being incorrectly scored or poor-quality and we did not correct the census data. This was predominantly because of sex ratio scores that were higher than normal but thought to be a real phenomenon, for example the Persian Gulf states. 21 censuses were also identified as exhibiting age heaping but were not being corrected due to being in the high-income or Central Europe, Eastern Europe, and Central Asia super-regions. After applying the age heaping corrections, we aggregated all single year age group population counts conducted outside of the high-income and Central Europe, Eastern Europe, and Central Asia super-regions into five-year age groups.

The third step facilitated utilisation of data that were not representative of the de facto population of interest, either in terms of the geographical area covered, the subpopulations covered, or a combination of both. A number of countries that exist in 2017 are amalgamations of two or more countries that existed in the past (eg, Germany), others have had semi-autonomous territories conduct separate censuses (eg, Transnistria), and other contemporary states are parts of historical aggregates (eg, states that were previously part of Yugoslavia). Oftentimes, censuses for fragmented or semi-autonomous areas occurred in different years and collected information about different age groups.

We estimated the population of the complete modern geographic unit for which we had a time series of separate censuses from all constituent historic or disputed territories. First, we collapsed all available censuses for the constituent parts to the most granular set of common age groups. After standardisation, we interpolated age-and-sex-specific populations using the age-and-sex-specific annual rate of change to generate annual time series spanning the available census data for each of the constituents. Finally, for all original census years corresponding to the largest constituent where there was overlap with the estimated populations from the smaller constituents, we summed the populations of all the constituents at the age-sex level to produce a census estimate representative of the entire modern geography. This method was used to combine censuses from East and West Germany, Moldova and Transnistria, Cyprus and the Turkish Republic of Northern Cyprus, Serbia and Kosovo, and Malaysia Peninsular, Sarawak, and Sabah. For modern countries that were formerly part of Yugoslavia, we were only able to extract historical census data that were reported according to ethnic (rather than geographic) affiliation. In this case, we applied the estimated age-sex proportions of the total historical aggregate population from the previous iteration of the Bayesian demographic balancing model to split the historic census data into modern geographies. These split data were used in Serbia; we obtained census data for the five other modern countries that were formerly part of Yugoslavia.

Singapore censuses only contained detailed age and sex population counts of residents, when non-residents accounted for a sizeable portion of the de facto population. Using available empirical death

counts in residents and non-residents, and assuming similar mortality between the two subpopulations, we utilised the relative age-pattern in the death counts to scale the resident population to total population.

A fourth step was used to correct for improper enumeration. Many censuses confront problems of under-enumeration, as in all but the smallest and most navigable countries reaching every single member of the population is logistically impossible. To address this issue, national statistical offices often conducted post-enumeration surveys (PES) soon after the completion of censuses to assess the degree to which individuals were either missed or double-counted by the census. The PES could thus quantify the overall bias of a given census, and those results could be used to adjust the population totals. We searched for PES based on the UNSTAT division's list of known or planned PES efforts in the 2000 and 2010 census rounds. We also looked for PES corresponding to any known census. Sources included country statistical websites, WorldCat catalog, data presented by countries during UN Stats symposia on the topic of PES, and academic publications. We identified a total of 165 PES that reported a net underenumeration percent, of which 63 reported underenumeration percent by age and/or sex. As most of our census data were unadjusted and for many we were unable to identify corresponding PES, we used a simple linear regression to predict percent adjustment for all ages and both sexes on the basis of the Socio-demographic Index (SDI) (Appendix Section 3).

$$totalPctAdjust = \beta_0 + \beta_1 SDI + \epsilon$$

The variance-covariance matrix from this model was used to simulate 1000 draws of the predicted total percent adjustment (*totalPctAdjust*) for each possible value of SDI. The variance of the 1000 draws simulated from the model was incorporated into the overall calculation of population uncertainty (See Appendix Section 2.3.2)

Given that under- and overenumeration varies significantly by age and sex, we used the 63 PES that reported underenumeration by age and/or sex to obtain a global age pattern of underenumeration. PES report inconsistent age groups; to address this we used DisMod-MR, an age-integrating Bayesian meta-regression tool that is widely used in the GBD.<sup>16,17</sup> We used SDI as a predictor in the DisMod-MR model. The age-sex pattern was shifted up or down to equal the predicted mean total percent adjustment and was applied to all census counts for which we had no documentation of prior adjustment.

As the final step of data processing, the Bayesian demographic balancing model and cohort component method of population projection (CCMPP) require a starting population as an input from which it can project populations forward in time. Where post-processed censuses were available for the year 1950 with single-year age groups up to the age group 95+, we used these directly. In all other cases we first split aggregate age groups in the oldest census available with person years lived ( ${}_nL_x$ ) in single-year age intervals using lifetables from the GBD 2017 mortality analyses<sup>5</sup>. This age pattern was then smoothed using a local first degree polynomial with bandwidth equal to 2 if the original age groups were in age interval lengths of 1 or 5 and bandwidth equal to 5 if in larger age.<sup>18</sup> If this oldest census was not in 1950 we projected the census backward using an inverse version of CCMPP with the assumption of zero migration. Normal CCMPP is described briefly in section 2.3.2; backward CCMPP simply solves for the population at the previous time point rather than the projecting to the next time point.

$${}_1N_{x-1}(t) = {}_1N_x(t+1) \cdot \frac{{}_1L_{x-1}(t)}{{}_1L_x(t)}$$

The equation for the open-ended age group is indeterminate and leaves what we call the upper missing triangle as the backward projection goes further back in time. These missing age groups are estimated using the 1950  ${}_nL_x$  age pattern from the GBD 2017 life tables. In some locations, as the census counts are projected backward, age misreporting in the oldest ages becomes extremely evident and leads to implausible age patterns; this is addressed by collapsing the original census to a lower open-ended age group so that the oldest age groups in the original census are ignored. In 33 countries we also used annualised rate of change between the oldest two censuses to back-project the total population and scaled the back projected age-specific population to the back-projected total population. Also, in 35 countries the assumption of zero migration used in backward CCMPP is not appropriate or the oldest census was too far from 1950 to back-project a reasonable age pattern; in these countries we have instead used GBD 2016 populations in 1950 as the baseline population. These 1950 populations were used as the prior for the Bayesian demographic balancing model but were input with considerable uncertainty to account for the fact that in most countries a census did not occur in 1950.

### Migration

Population, births, deaths, and migration are the four main components of the demographic balancing equation. Of these four, migration was the least well measured component, especially outside of high-income countries. CCMPP can use as input either the net number of migrants by sex, age, and year or the net migration proportion by sex, age, and year. In locations where censuses had been frequently conducted we input a prior of zero net migration into the Bayesian population model described in more detail below. However, this zero prior fails in locations with large migration between censuses or in cases where there has been a large amount of migration after the most recent census. This section describes the identification and extraction of migration data to replace the zero prior in certain locations.

The United Nations High Commissioner for Refugees (UNHCR)<sup>19</sup> provided data on the number of refugees in each country at the end of every year (EOY) by country of origin. This refugee stock data was used to derive net flows of refugees into, and out of, countries. For example, the change in the number of refugees in Afghanistan during the year 1991 was calculated as the difference between the number of refugees in Afghanistan EOY in 1991  $D_{AFG}(EOY 1991)$  and EOY in 1990  $D_{AFG}(EOY 1990)$ .

$$\Delta D_{AFG}[1991] = D_{AFG}(EOY 1991) - D_{AFG}(EOY 1990)$$

Similarly, the change in the number of refugees originating from Afghanistan and moving to other countries during the year 1991 was calculated as the difference between the number of refugees originating from Afghanistan EOY in 1991  $O_{AFG}(EOY 1991)$  and EOY in 1990  $O_{AFG}(EOY 1990)$ .

$$\Delta O_{AFG}[1991] = O_{AFG}(EOY 1991) - O_{AFG}(EOY 1990)$$

The net refugee migration into or out of Afghanistan during the year 1991 was then calculated as

$$\text{Net refugee migration}[1991] = (\Delta D_{AFG}[1991] - \Delta O_{AFG}[1991])$$



This was then converted to migration totals between midyear points by averaging adjacent year net refugee migration totals. The UNHCR data included separate totals for internally displaced persons but we excluded these from the analysis. In cases where a refugee crisis was occurring, the large influx or outflux of people made up a large proportion of the total number of migrants in a given year, allowing the use of UNHCR data in place of a zero prior.

In some countries like Germany, the Czech Republic, Romania, the United Arab Emirates, and Bahrain, large non-refugee migrations have occurred recently that the Bayesian population model could not estimate because of a lack of recent census data. In these locations we sought out migration data from EUROSTAT,<sup>20</sup> the Gulf Labour Markets, Migration and Population (GLMM) programme,<sup>21</sup> and various national statistics websites.

Only EUROSTAT provided migration data by age and sex; all other sources of data were listed as total number of migrants over some period of time. In order to prep these totals to be age- and sex-specific migration inputs into CCMPP, we calculated an age-sex pattern of migration that was then scaled up or down to equal the input net migrant totals. In most locations we used the aggregate EUROSTAT age and sex pattern. Where most of the recent migration has been comprised of young adult male temporary workers (Saudi Arabia, Bahrain, United Arab Emirates, Oman, and Kuwait), we used the age and sex pattern from the Bayesian demographic balancing model fit in Qatar. The most recent census in Qatar was conducted in 2015, allowing us to capture the uptick in recent migration. In Rwanda we assumed that the migration proportion age pattern was uniform across age and sex because migration during the 1994 genocide likely did not follow the typical migrant age pattern that was present in the European Union or the migratory worker age pattern present in Qatar.

### *Mortality*

The GBD mortality process produced yearly complete period life tables with single-year age groups up to 95+.<sup>5</sup> These life tables were used to calculate the survivorship ratio, which is a key input to CCMPP calculations and is shown briefly below in Appendix Section 2.3.2.

### *Fertility*

The fertility model presented in this paper estimated ASFR in five-year age groups between the ages of 10-14 and 50-54. In order to project populations forward in time using CCMPP, we needed yearly single-year age group ASFR estimates. We assigned each five-year age group ASFR value to the middle of its age group (20-24 age group would be assigned the age 22.5) and used an interpolating spline to derive complete ASFR single-year age patterns for each location-year-draw combination. Each complete single-year age pattern was then raked to the input five-year age pattern for consistency.

### *Sex ratio at birth*

The sex ratio at birth (srb) model presented in this paper produces yearly estimates of srb. These values are used in CCMPP to split live birth totals into sex-specific birth totals.

## Section 2.3.2 Modelling Strategy

### CCMPP

The demographic balancing equation defines how the total population changes over a time interval. CCMPP is commonly used for projecting populations forward in discrete time intervals at age- and sex-specific levels. It requires splitting the population into sex-specific cohorts and exposing these cohorts to fertility, mortality, and migration. This method is described in detail in Preston;<sup>22</sup> we will only be describing the fundamental equation here and one modification we made when incorporating migration.

$${}_1N_x(t+1) = \left[ \left( {}_1N_{x-1}(t) + \frac{{}_1G_{x-1}[t, t+1]}{2} \right) \cdot \frac{{}_1L_x(t)}{{}_1L_{x-1}(t)} \right] + \frac{{}_1G_{x-1}[t, t+1]}{2}$$

For any age group, except for the first and terminal age group, the population can be survived forward one-time interval with the survivorship ratio  $\frac{{}_1L_x}{{}_1L_{x-1}}$  derived from the GBD period life tables. A key assumption used throughout this method was that half the migrants during a time interval migrate at the beginning of the time interval and half migrate at the end of the interval. Preston defined  $G$  as the net flow of migrants during the projection period in the age interval  $x-1$  to  $x$ , a period measure;<sup>22</sup> because we estimated migration with the GBD Bayesian Demographic Balancing Model (described below), we instead defined  ${}_1G_{x-1}$  as the net flow of migrants during the projection period for the cohort initially between age  $x-1$  and  $x$  at the beginning of the projection period. This model estimated net migration proportions instead of counts, which we defined as the ratio of net migrants in a cohort to the population at the beginning of the projection period.

$${}_1g_x = \frac{{}_1G_x}{{}_1N_x}$$

This version of CCMPP was implemented in the template model builder (TMB)<sup>23</sup> code for the Bayesian Demographic Balancing Model and was implemented in R to calculate final posterior estimates of population.

### Bayesian Demographic Balancing Model

Wheldon and colleagues have previously developed a Bayesian hierarchical model (popReconstruct) to reconstruct human populations back in time by age and sex.<sup>24</sup> The popReconstruct model simultaneously estimates baseline population counts, fertility, mortality, migration, and sex ratio at birth in order to make population projections from CCMPP consistent with later census data points. Wheldon used initial bias-reduced inputs from the UN for all the key components of population change, including net migration. GBD provided initial estimates of fertility and mortality derived using replicable methods but did not produce estimates of migration due to a lack of data on migration for most locations/years and the difficulty in modelling migration directly. Instead, we used a modified version of the popReconstruct model, the GBD Bayesian Demographic Balancing Model, to indirectly estimate net migration.

## Model description

Both popReconstruct and the Demographic Balancing Model embedded CCMPP in a Bayesian hierarchical model. Consistent with the popReconstruct model, we used  $n$ ,  $g$ ,  $s$ ,  $f$ , and  $srb$  to symbolise population counts, net migration proportion, survival ratio, age-specific fertility rate and sex-ratio at birth, respectively. These parameters were indexed by sex ( $l$ ), single-year age groups ( $a$ ) and single calendar years ( $t$ ). We used an asterisk (\*) to indicate initial values of parameters.

Level 1 modelled the percent difference between non-baseline sex-age-year-specific census counts ( $n_{l,a,t}^*$ ) and the corresponding projected sex-age-year-specific populations counts ( $n_{l,a,t}$ ) from CCMPP in Level 2. We modelled this as the percent difference, so that the variance ( $\sigma_{n_{l,a,t}^*}^2$ ) associated with each census data point was on the same scale across locations and age groups of various population magnitudes.

$$\text{Level 1: } \frac{n_{l,a,t}^* - n_{l,a,t}}{n_{l,a,t}} \sim \text{Normal}(0, \sigma_{n_{l,a,t}^*}^2)$$

Level 2 transformed the model inputs to projected sex-age-year-specific population counts ( $n_{l,a,t}$ ) from input values.

$$\text{Level 2: } n_{l,a,t} = \text{CCMPP}(n_{l,a,t_0}, g_{l,a,t}, s_{l,a,t}^*, f_{l,a,t}^*, srb_t^*)$$

At Level 3 we modelled the initial estimates of migration ( $g_{l,a,t}^*$ ) and the baseline 1950 population ( $n_{l,a,t_0}^*$ ). Similar to level 1, we modelled the baseline population as the percent difference between the estimated baseline 1950 population and the input values. We chose to model the net migration proportion as an autoregressive process over both age and time in order to avoid extreme discontinuities in the age pattern and time series for migration. Unlike the popReconstruct model, we did not model ASFR ( $f_{l,a,t}^*$ ), survival ratios ( $s_{l,a,t}^*$ ) or sex ratio at birth ( $srb_t^*$ ) and instead kept them fixed at their input values. With the zero prior that we often used for migration, the model could not distinguish between changing fertility, mortality, or migration to match the census counts.

$$\text{Level 3: } \frac{n_{l,a,t_0} - n_{l,a,t_0}^*}{n_{l,a,t_0}^*} \sim \text{Normal}\left(0, \sigma_{n_{l,a,t_0}^*}^2\right)$$

$$g_{l,a,t} - g_{l,a,t}^* \sim \text{AR1: AR1}(\sigma_g, \rho_{g_a}, \rho_{g_t})$$

Level 4 defined various hyper-priors. We specified the prior distribution on the correlation parameters for migration to have greater correlation over time than age.

$$\text{Level 4: } \log(\sigma_g) \sim \text{Normal}(-5, 9)$$

$$\text{logit}(\rho_{g_a}) \sim \text{Normal}(-3, 0.01)$$

$$\text{logit}(\rho_{g_t}) \sim \text{Normal}(3, 0.01)$$

Instead of estimating a single variance term for all census counts, we set the initial standard deviation associated with each sex-age-year-specific census data point ( $\sigma_{n_{i,a,t}^*}$ ) to 0.01 if the location was in the high-income super-region, to 0.03 if the location was in Central Europe, Eastern Europe, or Central Asia, and to 0.05 for all other super-regions. This standard deviation could be multiplied by scalars to increase or decrease the weight of a data point, and we used this to address multiple issues: 1) Our method to estimate baseline populations produced rough estimates of population in 1950 that were input into the model, but the method could lead to extreme migration in the 1950s. Because of the considerable uncertainty in the baseline population, we multiplied the standard deviation of the baseline counts by two so that the estimated baseline population could change considerably. 2) We implemented the model such that census counts that were not in single-year age groups were compared to the projected counts aggregated to the same age groups. This led to fewer data points present in censuses with non-single-year age groups or terminal age groups below 95+; the model did not fit the census as well with less granular age groups. To address this, we divided each census data point's standard deviation by the width of the age interval, so that in total each census was given similar weight in the model. 3) To address age misreporting at older ages, we multiplied the standard deviation by a scalar that linearly increased from 1 at age 50 to 3 for the terminal age group 95+. 4) To address under enumeration in the under-5 age groups, we multiplied the standard deviation of the population counts by a scalar that linearly increased from 1 for age 5 to 3 for age 0. For locations outside of the high-income and Central Europe, Eastern Europe, and Central Asia super-regions, we did not input non-baseline under-5 population counts for all censuses. This made the under-5 populations dependent on fertility, under-5 mortality, and census counts at later age groups.

Older age misreporting was often evident, as the model predicted extreme immigration in older ages to match implausibly high counts of older individuals. The method described above gave less weight to the older census counts, and in addition we ran the model multiple times for different maximum ages between 55 and 95. For each model version we excluded from the model fitting process any population data points that included an age group that started above the maximum age. For each model version for a given location we then calculated 1) the mean average percent error (MAPE) between the input census data and the estimated population for each of the data points that were included in the model and 2) the weighted mean of the absolute value of the migration proportions for five-year age groups between 55 and 95 with a weight of 1 given to age group 55, 2 to age group 60 and so on, up to a weight of 9 for age group 95+. We then selected the highest maximum age group that was within 5% of the minimum MAPE value across the model versions and within 0.005 of the minimum weighted mean of the older age migration proportions. This method balanced lowering migration in the oldest age groups and maintaining a good fit to the census data included in the model.

The Bayesian Demographic Balancing model was fit separately by location for the years 1950–2017, with single-year age groups up to a terminal age group of 95+. Final population estimates were then derived using CCMPP with posterior estimates of the baseline population and net migration proportion, in addition to GBD estimates of fertility, mortality, and sex ratio at birth as inputs.

### Population uncertainty

After estimating a complete time series of age- and sex-specific population using CCMPP, we estimated population uncertainty using a combination of out of sample predictive validity and uncertainty in the adjustment for census completeness as described in Appendix Section 2.3.1.

There was considerable uncertainty associated with the PES results and our model of PES adjustments. This uncertainty was incorporated into the uncertainty around population in census years and in years before, between, and after; censuses inform the size of the population in non-census years as well as census years. From the model of census completeness, we calculated the variance of the percent adjustment for completeness ( $Var_{completeness}$ ) associated with each location-year based on the SDI value.

Additional uncertainty in population between censuses was a function of the number of years to the closest census and our estimates of migration, mortality, and fertility. To quantify this uncertainty, we held out census data from the GBD Bayesian Demographic Balancing Model in the 143 national locations where we had at least five censuses that had more than just total population by sex available after processing of the census data described in Appendix Section 2.3.1. In these locations we fit the model 20 times per location with a random subset of between one and five censuses used to fit the model and the rest held out. We calculated the percent error between the projected posterior estimates of population and the held-out census data and compiled these percent errors across locations by the number of years to the closest census. We then fit a linear regression on the root mean squared percent error ( $RMSPE$ ) as a function of the number of years to the closest census ( $YearsToCensus$ ).

$$RMSPE = \beta_0 + \beta_1 YearsToCensus + \varepsilon_i$$

For each location-year we then had the predicted variance of the percent adjustment for completeness ( $Var_{completeness}$ ) based on the SDI in that year and the predicted out of sample percent error based on the distance from a census ( $RMSPE$ ). We combined these sources of uncertainty in variance space for each year.

$$Var_{pop} = Var_{completeness} + RMSPE^2$$

This total variance for population was then used to simulate draws of population percent error ( $PopPctError$ ) by location-year.

$$PopPctError \sim Normal(0, Var_{pop})$$

Finally, these percent errors were used to calculate draws of population that incorporated both the uncertainty in the PES adjustment and the out of sample variance associated with errors in migration, fertility, and mortality estimates and the distance from a census.

$$Pop_{draw} = Pop_{mean} + (Pop_{mean} * PopPctError_{draw})$$

### *GBD world population age standard*

Age-standardized populations in the GBD were calculated using the GBD world population age standard. For GBD 2013, GBD 2015 and GBD 2016, the age-specific proportional distributions of all national locations from the UNPOP World Population Prospects 2012 revision for all years from 2010 to 2035 were used to generate a standard population age structure using the non-weighted mean across all the aforementioned country-years. For GBD 2017 we have used the non-weighted mean of 2017 age-specific proportional distributions from the estimates produced in this study for all national locations with a population greater than 5 million people in 2017 to generate an updated standard population age structure.

## Section 3. Socio-demographic Index (SDI) Analysis

### Section 3.1. Overview

The Socio-demographic Index (SDI) is a composite indicator of development status strongly correlated with health outcomes. In short, it is the geometric mean of 0 to 1 indices of TFU25, mean education for those aged 15 and older (EDU15+), and lag-distributed income (LDI) per capita.

### Section 3.2 Development of revised SDI indicator

SDI was originally constructed for GBD 2015 using the Human Development Index (HDI) methodology, wherein a 0 to 1 index value was determined for each of the original three covariate inputs (TFR in ages 15 to 49, EDU15+, and LDI per capita) using the observed minima and maxima over the estimation period to set the scales.<sup>1</sup>

In response to feedback from collaborators and the evolution of the GBD, we have refined the indicator with each GBD cycle. For GBD 2017, in conjunction with our expanded estimation of age-specific fertility, we replaced TFR with TFU25 as one of the three component indices. The TFU25 provides a better measure of women's status in society, as it focuses on ages where childbearing disrupts the pursuit of education and entrance into the workforce. In addition, we observe that in highly developed countries the TFU25 has tended to decline consistently over time, even amid rebounds in TFR driven by increasing fertility in older ages. SDI calculated with TFU25 showed slightly higher correlation with U5MR (-.940; TFR: -.936) and life expectancy at birth (.904; TFR: .897). The concordance correlation coefficient between SDI using the GBD 2016 method and the updated method for GBD 2017 was 0.981.

During GBD 2016 we moved from using relative index scales to absolute scales to enhance the stability of SDI's interpretation over time, as we noticed that the measure was highly sensitive to the addition of subnational units that tended to stretch the empirical minima and maxima.<sup>2</sup> We selected the minima and maxima of the scales by examining the relationships each of the inputs had with life expectancy at birth and under-5 mortality and identifying points of limiting returns at both high and low values, if they occurred prior to theoretical limits (eg, a TFU25 of 0).

Thus, an index score of 0 represents the minimum level of each covariate input past which selected health outcomes can get no worse, while an index score of 1 represents the maximum level of each covariate input past which selected health outcomes cease to improve. As a composite, a location with an SDI of 0 would have a theoretical minimum level of development relevant to these health outcomes, while a location with an SDI of 1 would have a theoretical maximum level of development relevant to these health outcomes.

The final scales for GBD 2017 are summarized in table E below.

*Table E. Final SDI scales*

| Input          | Lower Bound                         | Upper Bound                |
|----------------|-------------------------------------|----------------------------|
| TFU25          | 0                                   | 3                          |
| LDI per capita | 250 USD (5.52 log USD) <sup>a</sup> | 60,000 USD (11.00 log USD) |
| EDU15+         | 0 years                             | 17 years                   |

<sup>a</sup> The minimum for the LDI scale was originally set at the theoretical limit of 0 USD, as we did not observe an asymptotic relationship between log(LDI) and  $E_0$  or  $5q_0$  at lower values of log(LDI). Empirically, however, we also did not observe an LDI below 350 USD (5.86 log USD) for the estimation period 1970-2016. In log-space, this meant that approximately half of our scale was not being utilised, compressing the observed variation in LDI and diminishing its meaningful contribution to SDI. Accordingly, we set the lower limit on LDI to 250 USD (5.52 log USD) to ensure we were fully utilising the range of the scale to capture its variation across space and time, as is the case with the other two inputs.

Using scales described above, we computed the index scores underlying SDI as follows:

$$I_{cly} = \frac{(C_{ly} - C_{low})}{(C_{high} - C_{low})}$$

Where  $I_{cly}$  – the index for covariate  $C$ , location  $l$ , and year  $y$  – is equal to the difference between the value of that covariate in that location-year and the lower bound of the covariate divided by the difference between the upper and lower bounds for that covariate. If the values of input covariates fell outside the upper or lower bounds (eg, LDI per capita greater than 60,000 USD), they were mapped to the respective upper or lower bounds. The index value for TFU25 was computed as  $1 - I_{TFU25ly}$ , as lower TFU25s correspond to higher levels of development, and thus higher index scores. For GBD 2017 we expanded the computation of SDI to 890 national and subnational locations spanning the time period 1950–2017.

The composite SDI was the geometric mean of these three indices for a given location-year. The cutoff values used to determine quintiles for analysis were then computed using country-level estimates of SDI for the year 2017, excluding countries with populations less than 1 million. SDI groupings by geography are provided in Appendix Table 7; SDI values by location are provided in Appendix Tables 8-10.

### *Example Calculation*

Below we present the calculation of SDI for a hypothetical country in the year 2010

$TFU25 = 1.09$ ; Mean educ yrs pc = 8.23;  $\ln LDI = 9.60$

$$I_{TFU25} = 1 - \frac{1.09 - 0}{3 - 0} = .637$$

$$I_{Educ} = \frac{8.23 - 0}{17 - 0} = .484$$

$$I_{\ln LDI} = \frac{9.60 - 5.52}{11.00 - 5.52} = .744$$

$$SDI = \sqrt[3]{I_{TFU25} * I_{Educ} * I_{\ln LDI}} = \sqrt[3]{.637 * .484 * .744} = .611$$

## Section 4. References

- 1 Wang H, Naghavi M, Allen C, *et al.* Global, regional, and national life expectancy, all-cause mortality, and cause-specific mortality for 249 causes of death, 1980–2015: a systematic analysis for the Global Burden of Disease Study 2015. *The Lancet* 2016; **388**: 1459–544.
- 2 Wang H, Abajobir AA, Abate KH, *et al.* Global, regional, and national under-5 mortality, adult mortality, age-specific mortality, and life expectancy, 1970–2016: a systematic analysis for the Global Burden of Disease Study 2016. *The Lancet* 2017; **390**: 1084–150.
- 3 United Nations Population Division | Department of Economic and Social Affairs. <http://www.un.org/en/development/desa/population/>
- 4 Human Mortality Database. <http://www.mortality.org>
- 5 Gakidou E. Global, regional, and national under-5 mortality, adult mortality, age-specific mortality, and life expectancy, 1950-2017: a systematic analysis for the Global Burden of Disease Study 2017. Under Review.
- 6 UNSD — Demographic and Social Statistics. <https://unstats.un.org/unsd/demographic-social/products/dyb/>
- 7 Max Planck Institute for Demographic Research (Germany) and Vienna Institute of Demography (Austria). Human Fertility Collection. [www.fertilitydata.org](http://www.fertilitydata.org)
- 8 UNSD — Welcome to UNSD. <https://unstats.un.org/home/>
- 9 IPUMS USA. <https://usa.ipums.org/usa/>
- 10 UT College of Liberal Arts: <https://liberalarts.utexas.edu/prc/>



- 11 WorldCat.org: The World's Largest Library Catalog. <https://www.worldcat.org/>
- 12 Shryock HS, Siegel JS, Larmon EA. The Methods and Materials of Demography. U.S. Bureau of the Census, 1973.
- 13 Feeney G. A technique for correcting age distributions for heaping on multiples of five. *Asian Pac Census Forum* 1979; **5**: 12–4.
- 14 UNHCR - The UN Refugee Agency. <http://www.unhcr.org/en-us/>
- 15 Home - Eurostat. <http://ec.europa.eu/eurostat> (accessed April 8, 2018).
- 16 GLMM - Gulf Labour Markets and Migration. GLMM. <http://gulfmigration.eu/>
- 17 Preston SH. The Changing Relation between Mortality and Level of Economic Development. *Popul Stud* 1975; **29**: 231.
- 18 Wheldon MC, Raftery AE, Clark SJ, Gerland P. Reconstructing Past Populations With Uncertainty From Fragmentary Data. *J Am Stat Assoc* 2013; **108**: 96–110.

## Section 5. Figures and Tables

# Appendix Figure 1a. Analytical Flowchart for the GBD 2017 Population Estimation Process

## Step 1: Population Census and Registry Data Standardization

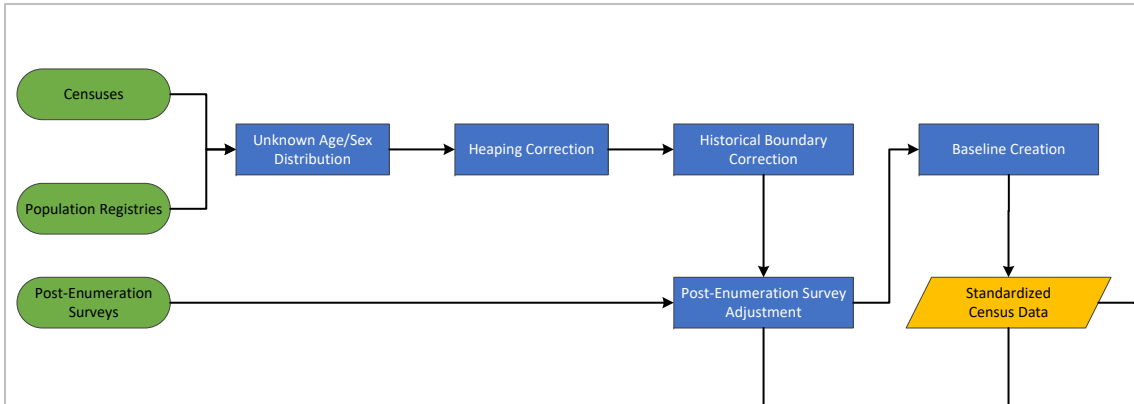

## Step 3: Population modeling using Cohort Component Method of Population Projection

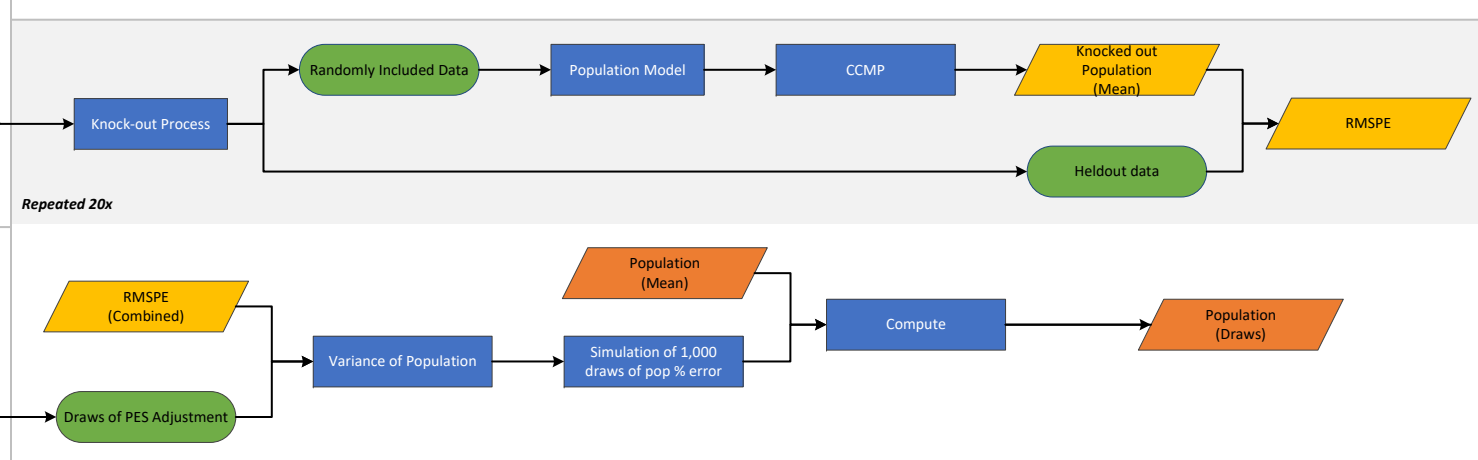

## Step 2: Input Development for GBD Bayesian Demographic Balancing Model

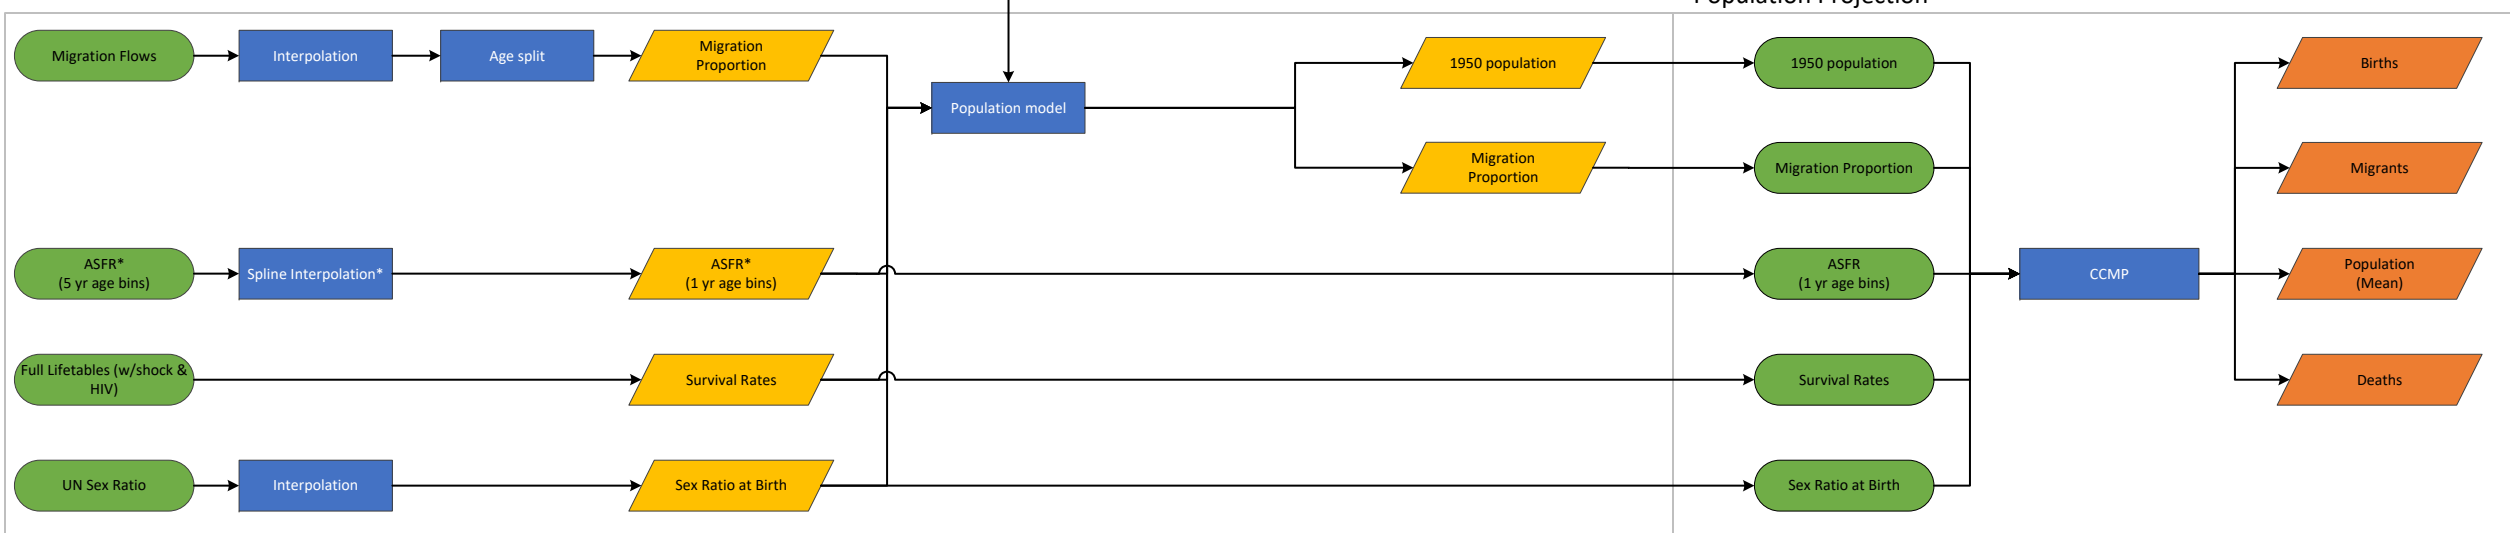

**Legend**

- Input (Green rounded rectangle)
- Process (Blue rectangle)
- Intermediate Results (Yellow parallelogram)
- Final Results (Orange parallelogram)

\* These steps occur in at the end of fertility model (see Step 5 in the fertility analytical flowchart). Included here for comprehensiveness, colored according to it's relationship to the population process

# Appendix Figure 1b. Analytical Flowchart for the GBD 2017 Fertility Estimation Process

## Step 1: Estimate Age-Specific Fertility Rates using Complete Birth Histories & Vital Registrations (Loop 1)

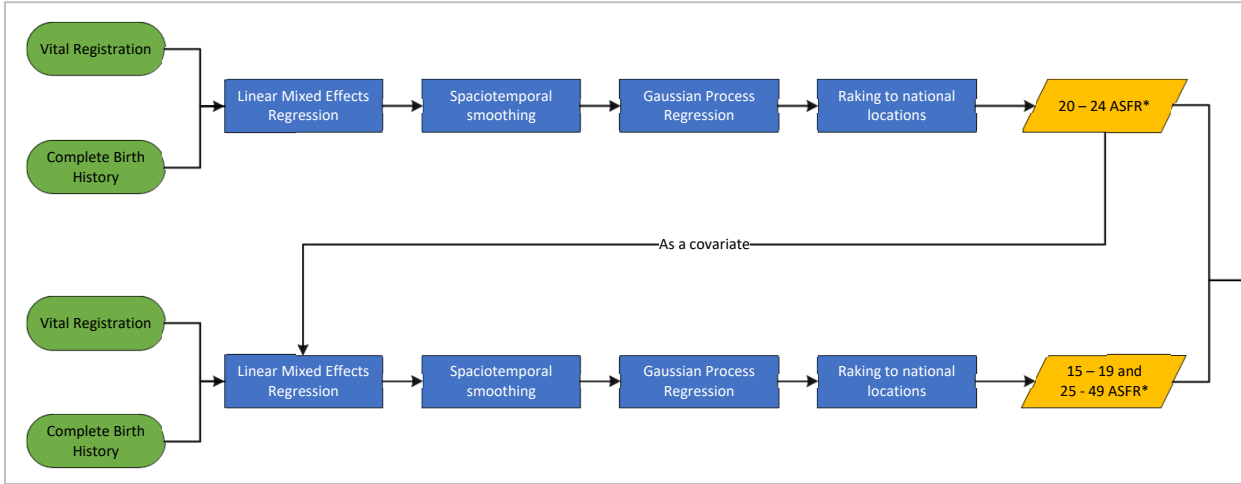

## Step 2a: Age-split Summary Birth Histories using ASFR Age-Pattern

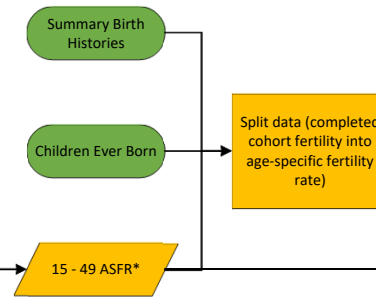

## Step 2b: Location-split Registered Births

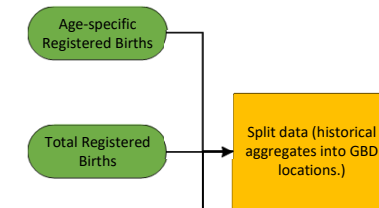

## Step 2c: Remaining Total Birth Registry data split.

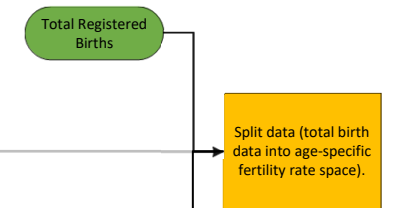

In cases where data is in total birth space and in historical location aggregates, the data is first split into standard locations in step 2b and then split into age-specific fertility rate space in step 2c. This is represented by the dark grey line shown above.

## Step 3: Estimate Age-Specific Fertility Rates using Complete Birth Histories and Split Data (Loop 2)

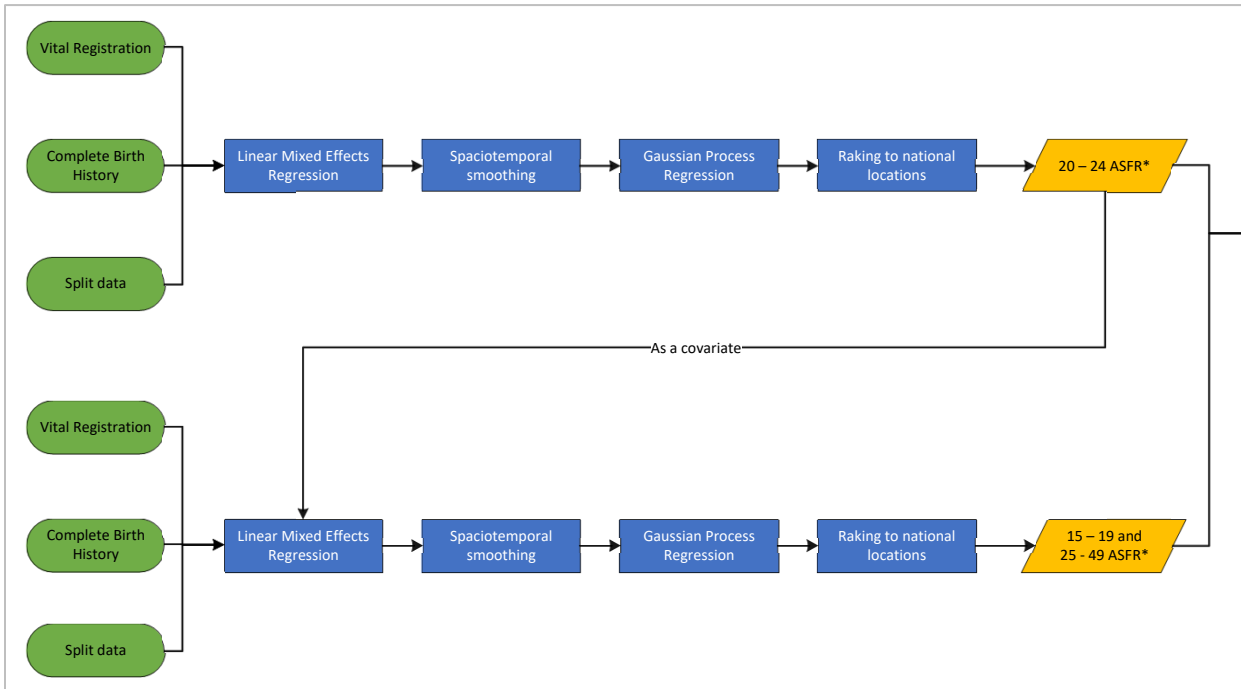

## Step 4: Estimate 10 – 14 and 50 – 54 Age-Specific Fertility Rates

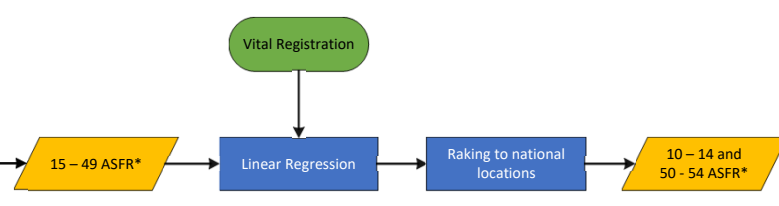

## Step 5: Use 10 – 54 ASFR to output TFR, ASFR (1 year bins), and Live Births

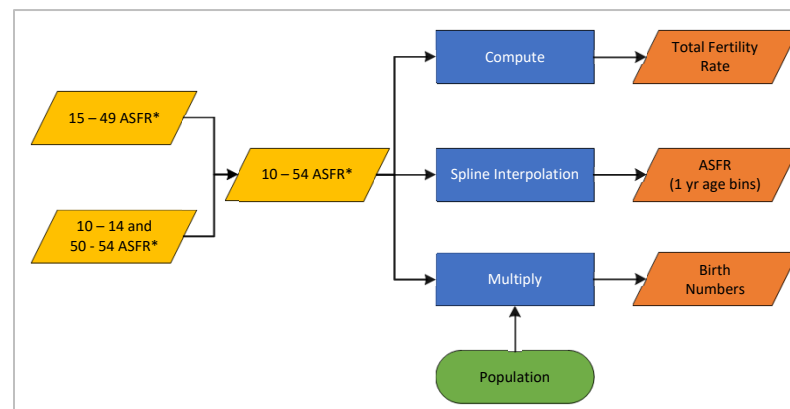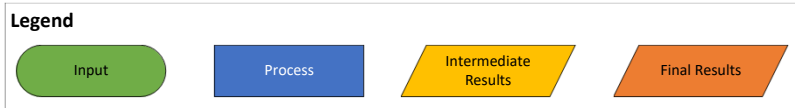

\*All intermediate ASFR estimates are computed in 5 year age-bins until the spline interpolation in step 5 of the model.

Appendix Figure 2. Census and registry availability by location and year  
 Central Europe, Eastern Europe, and Central Asia

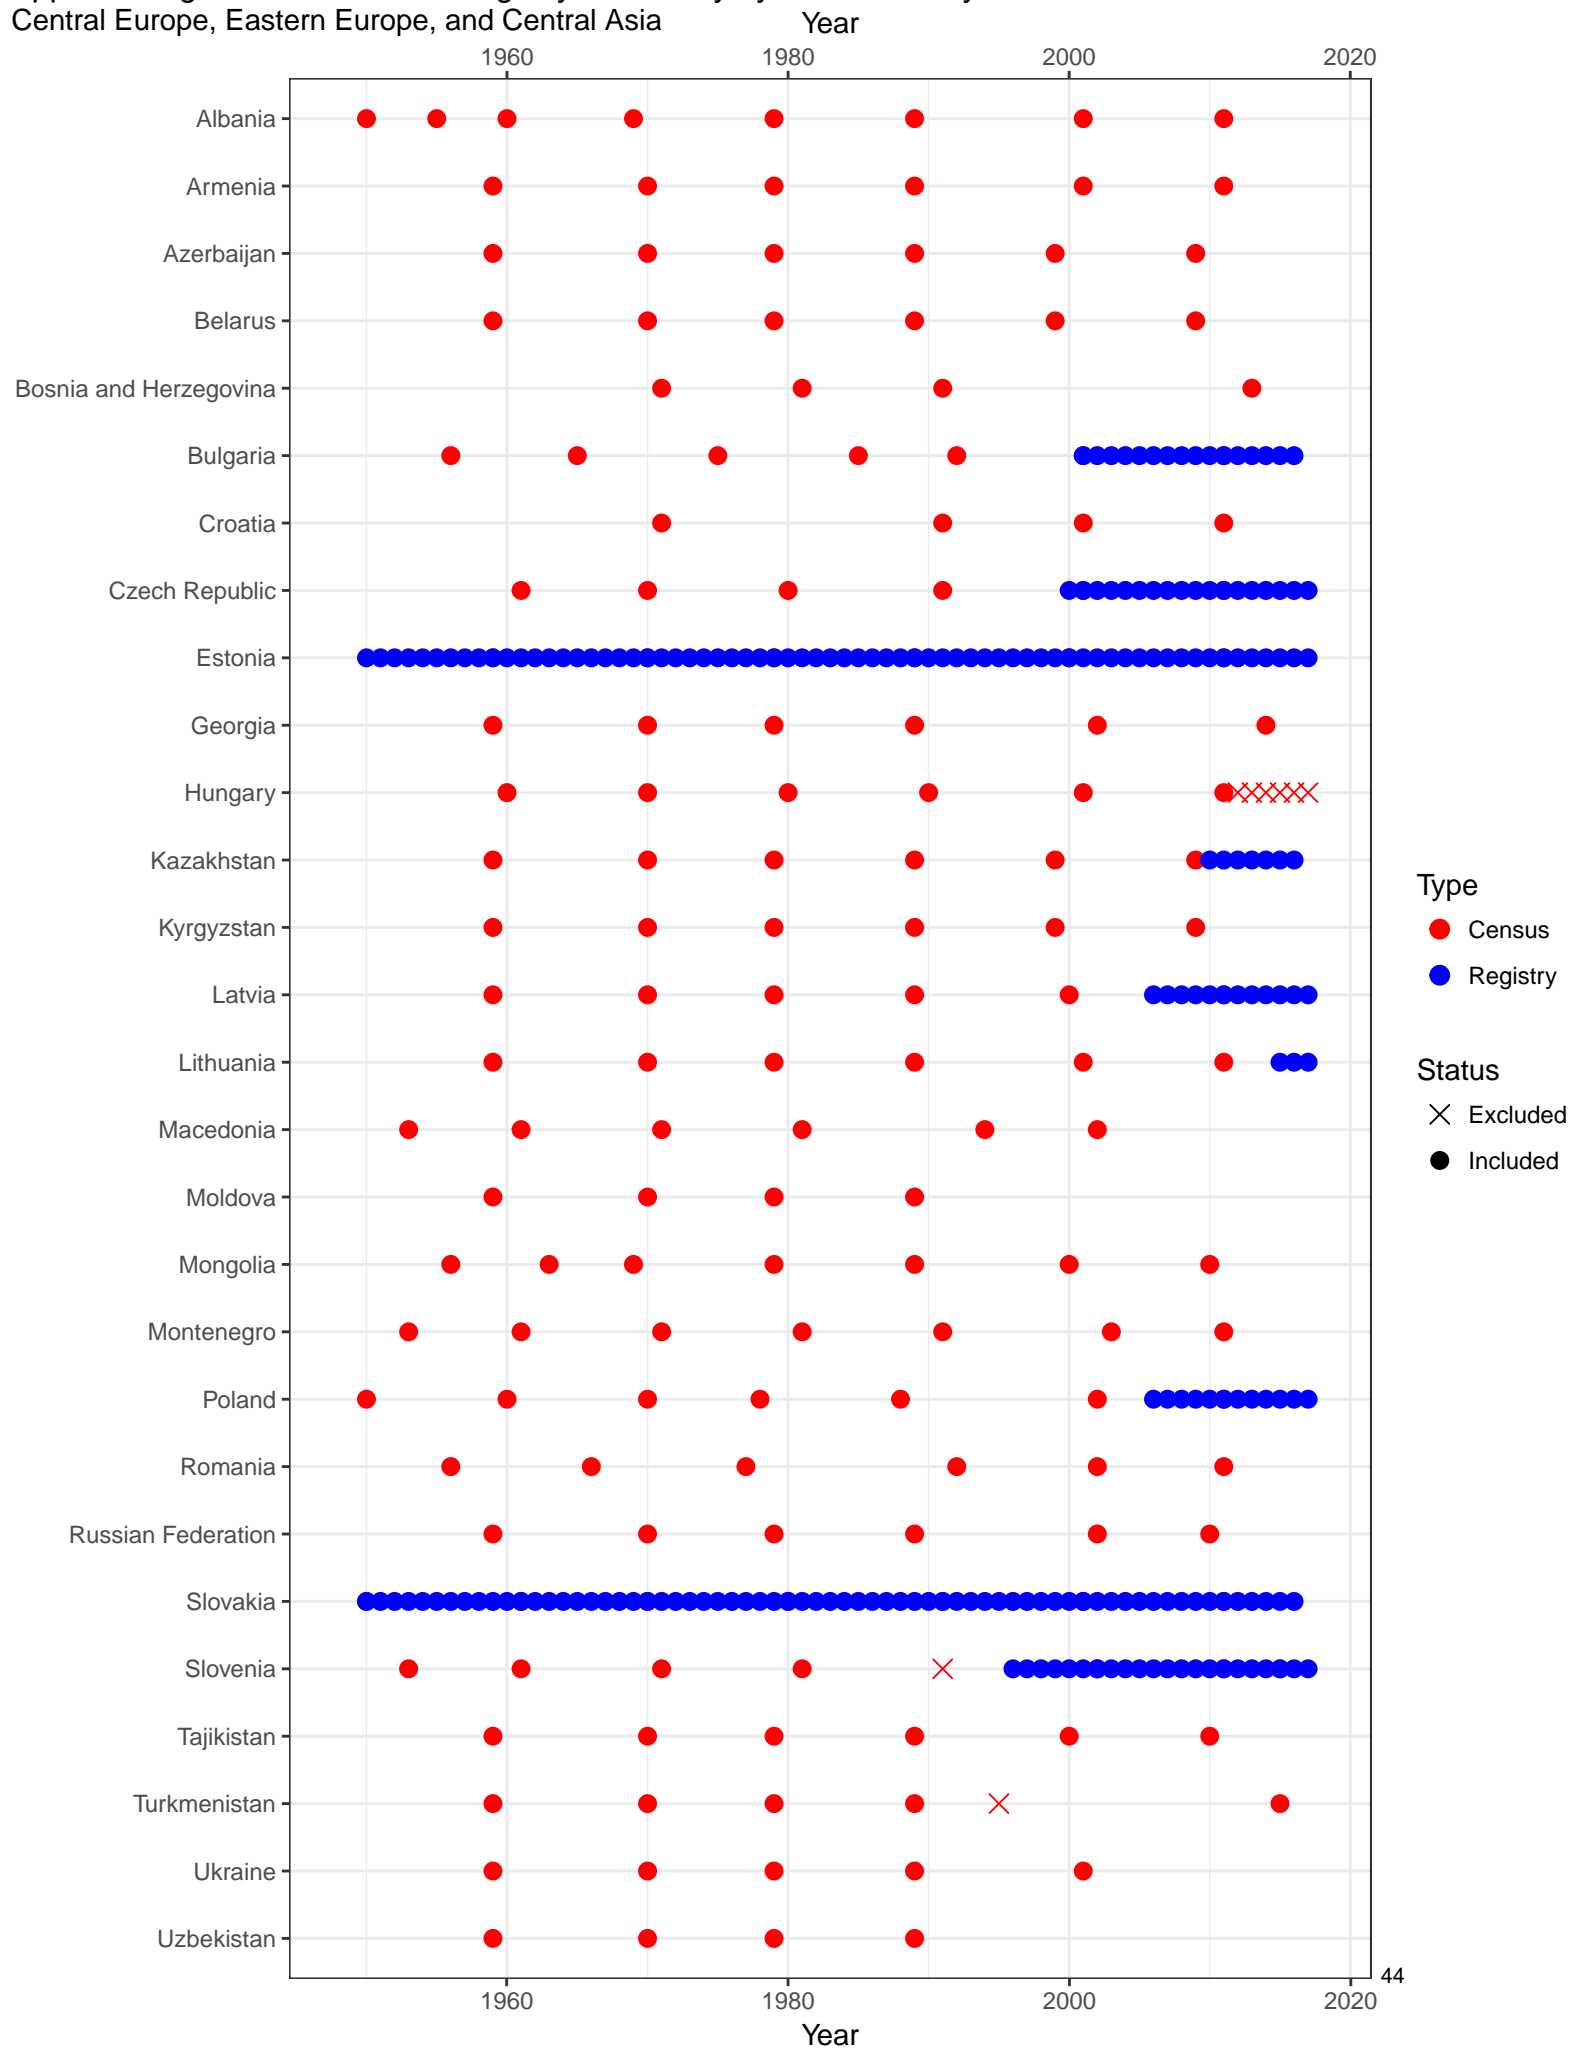

High-income

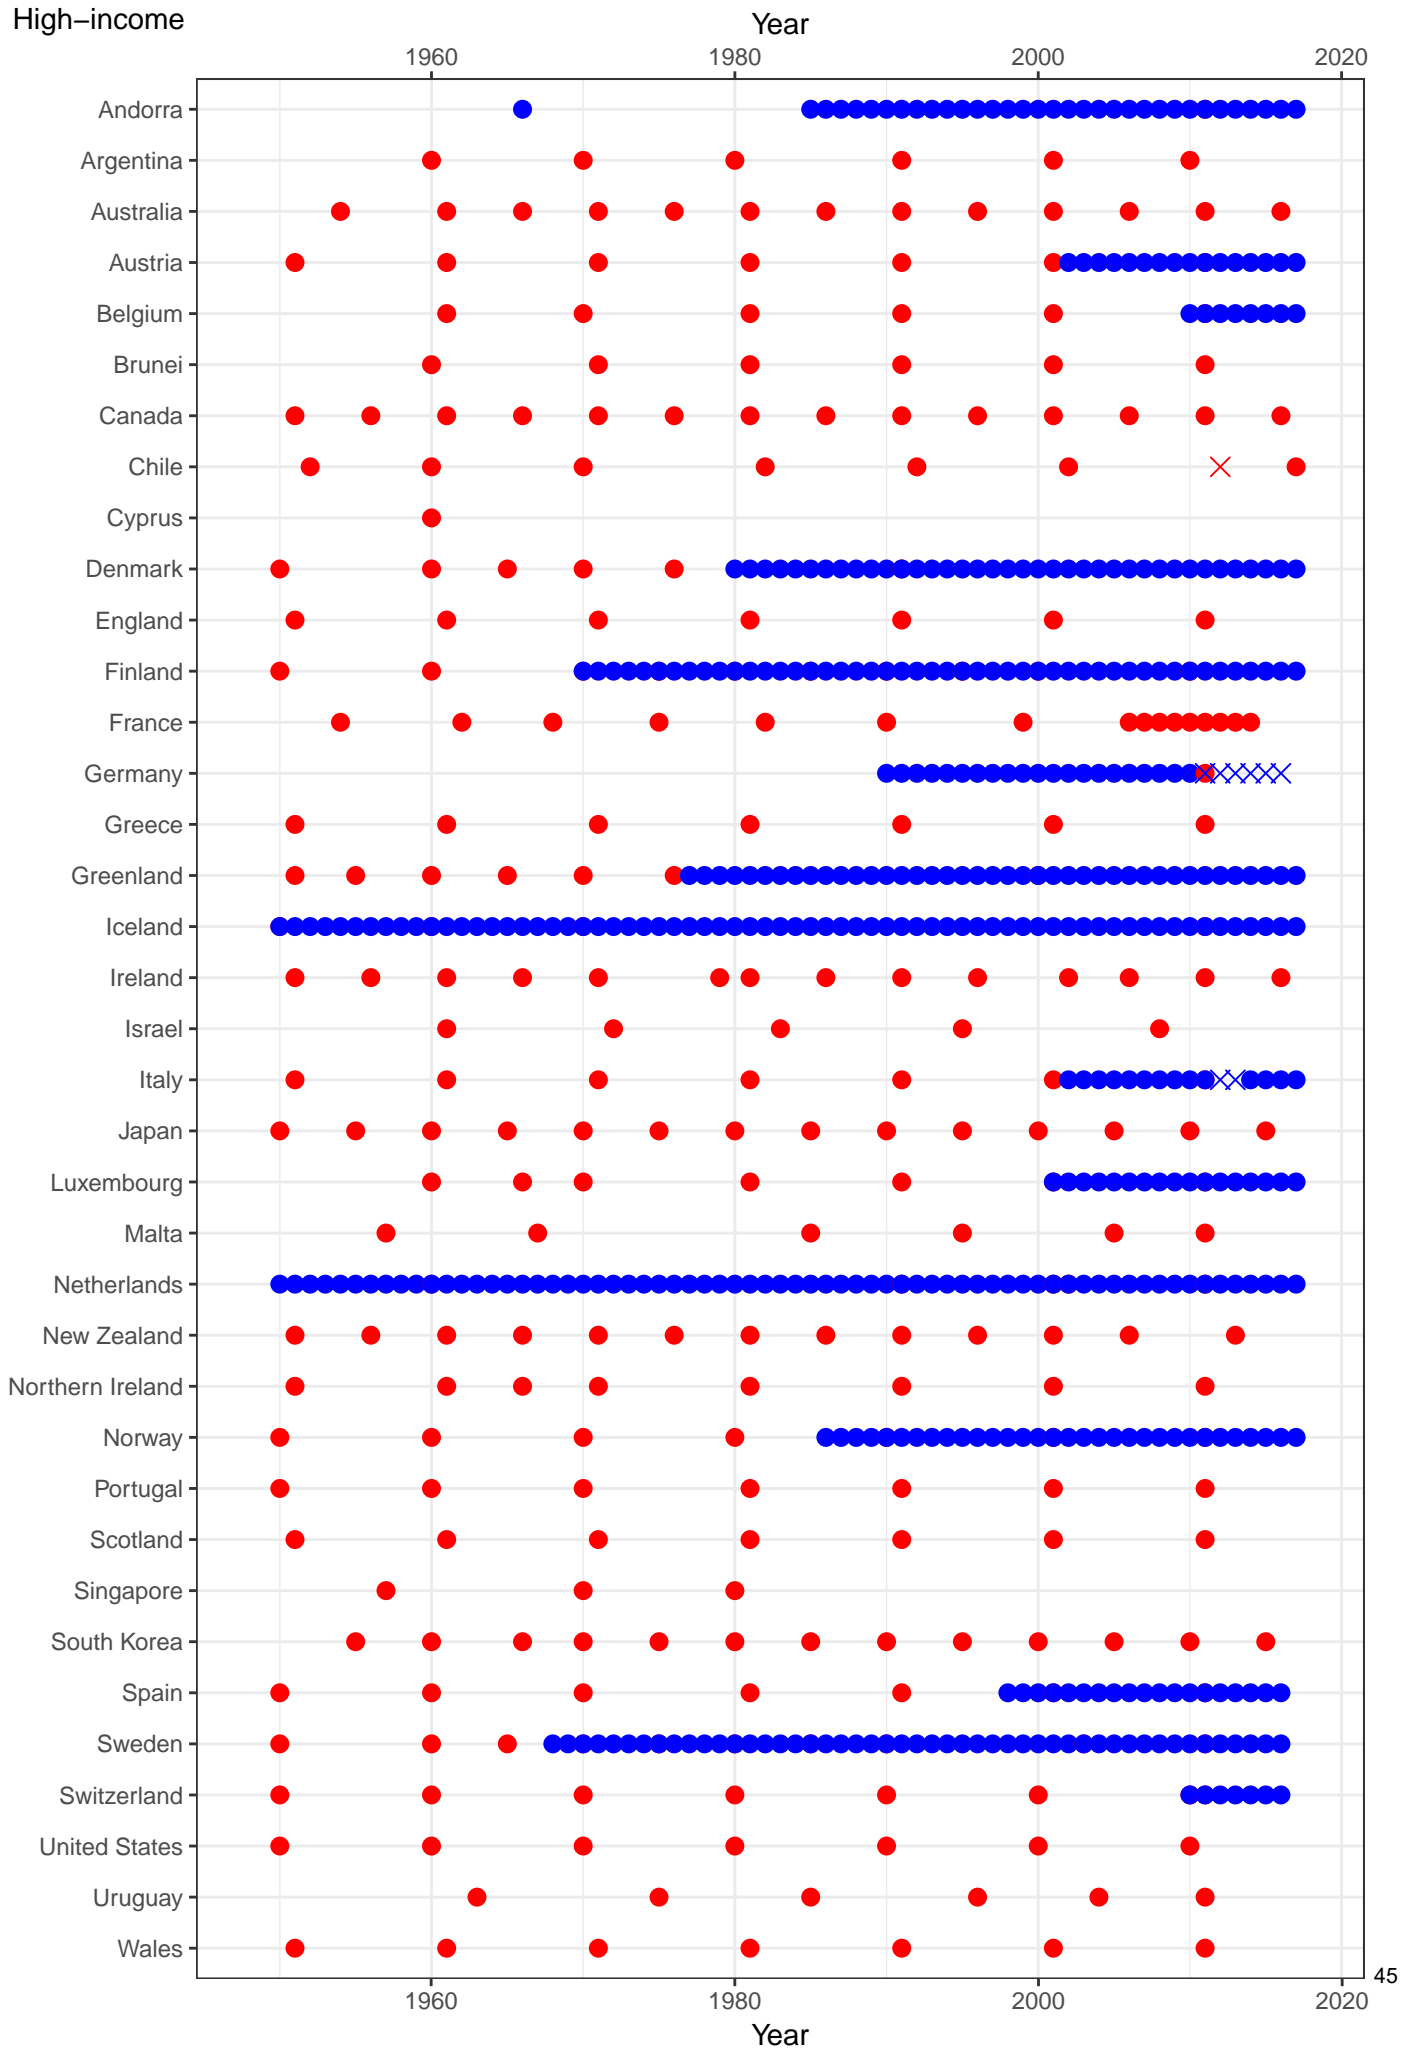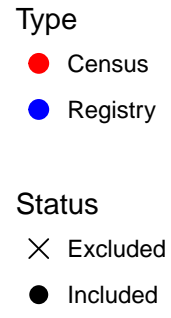

# Latin America and Caribbean

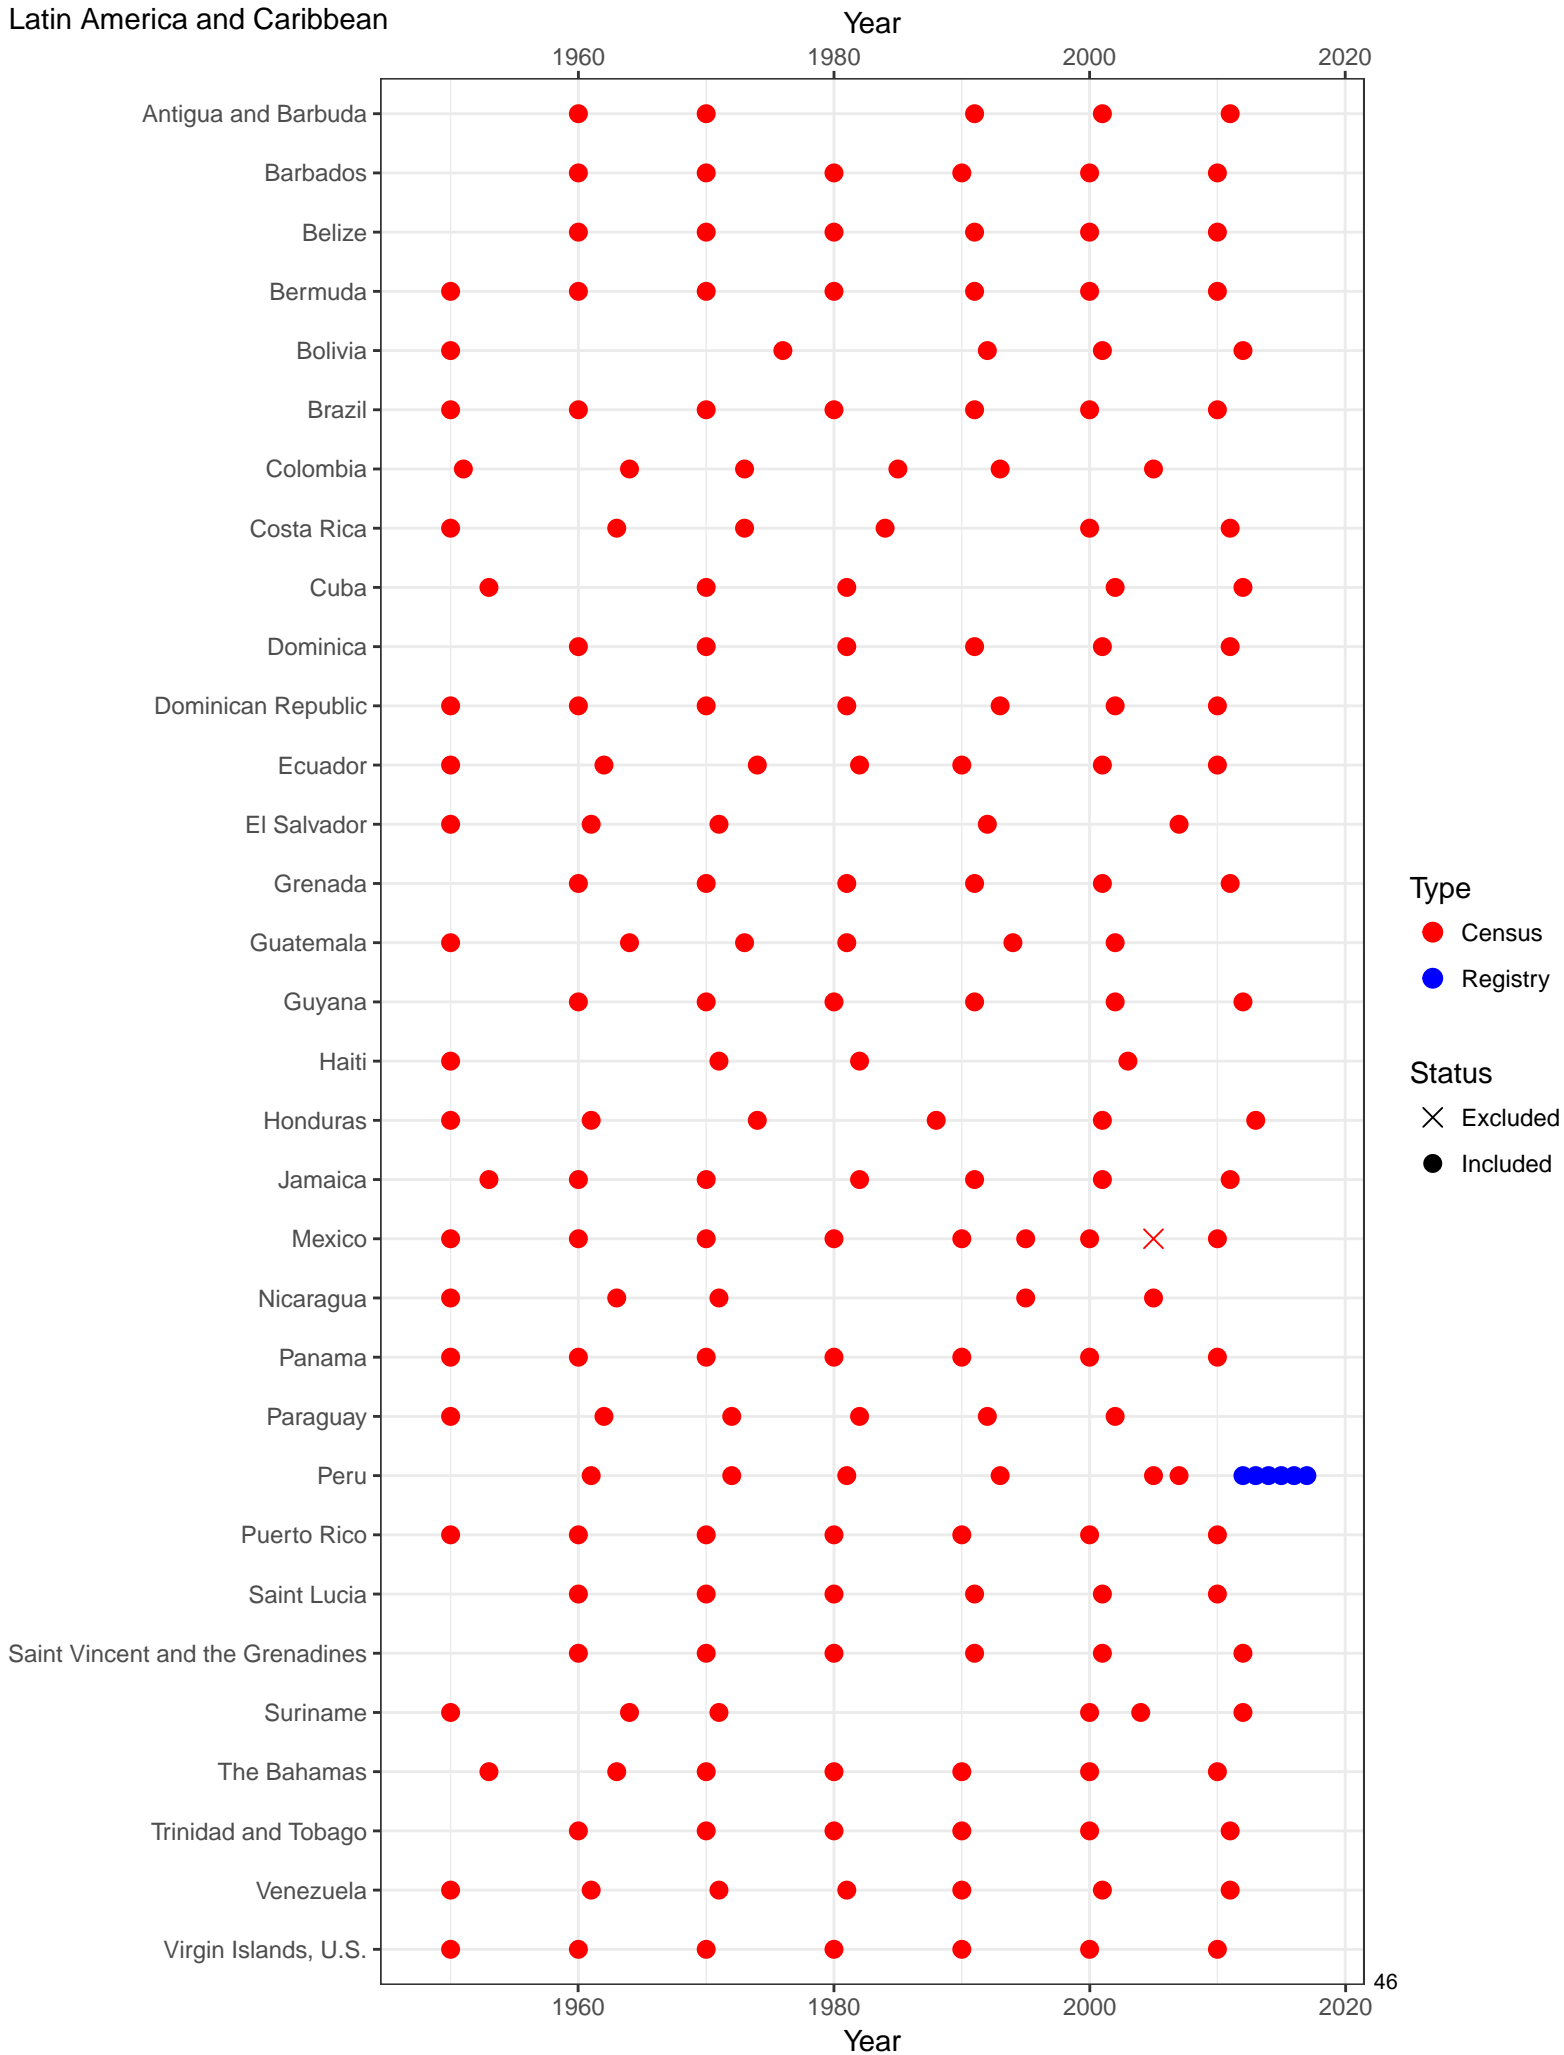

# North Africa and Middle East

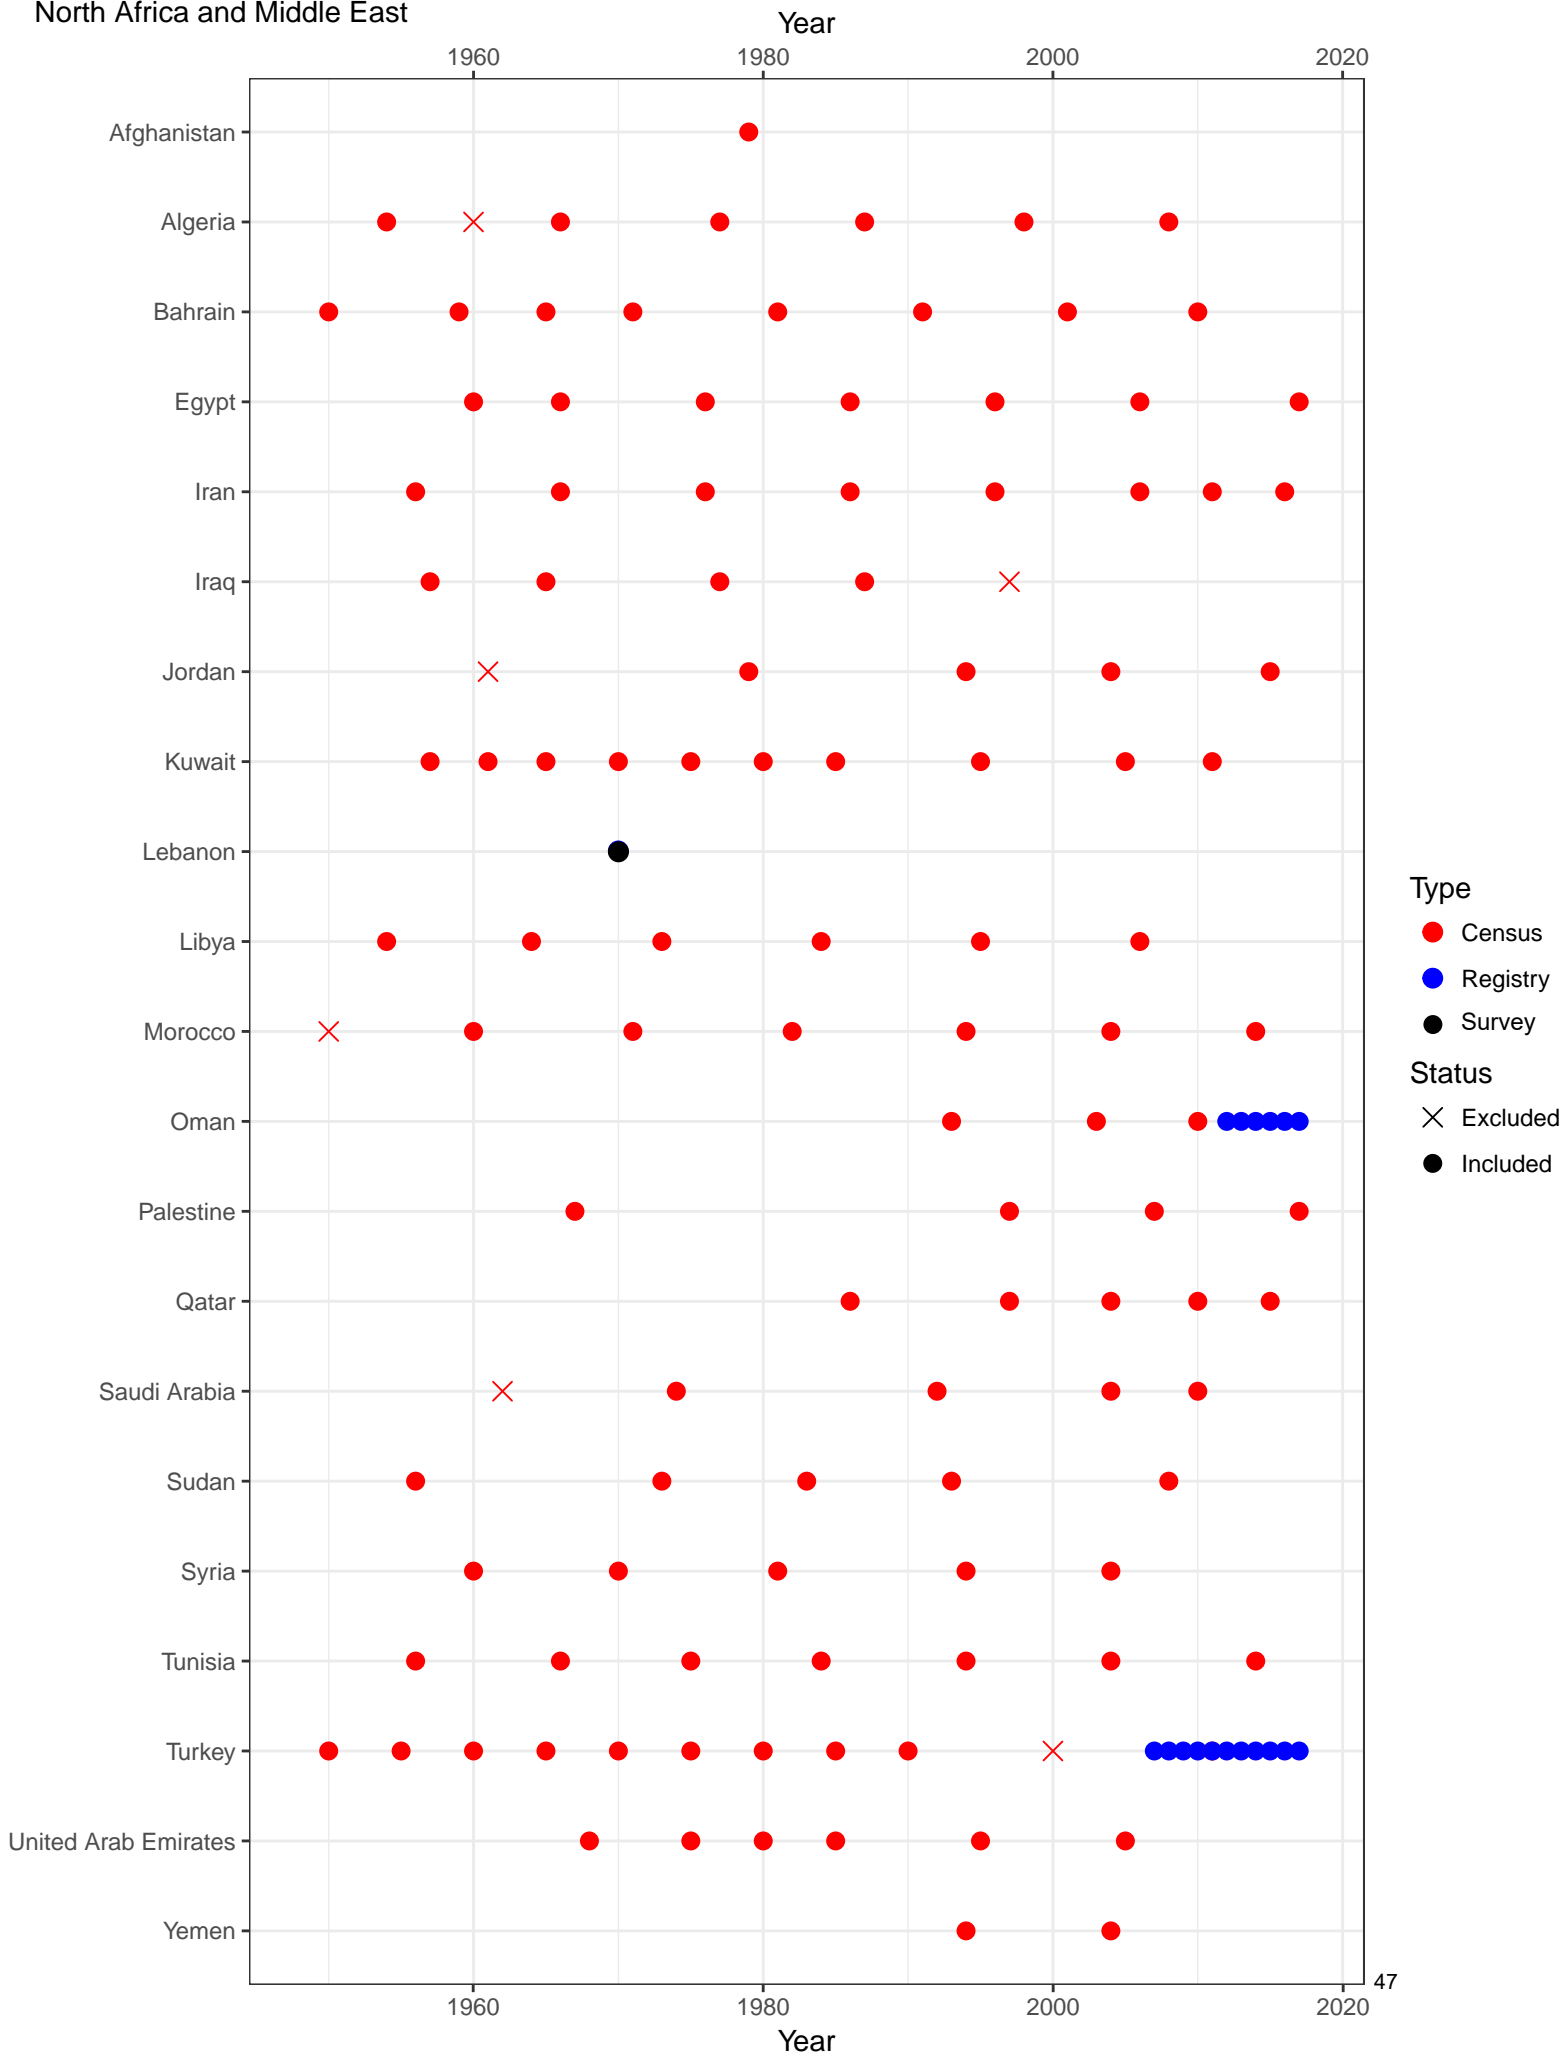



South Asia

Year

1960

1980

2000

2020

Bangladesh

Bhutan

India

Nepal

Pakistan

Type

● Census

Status

● Included

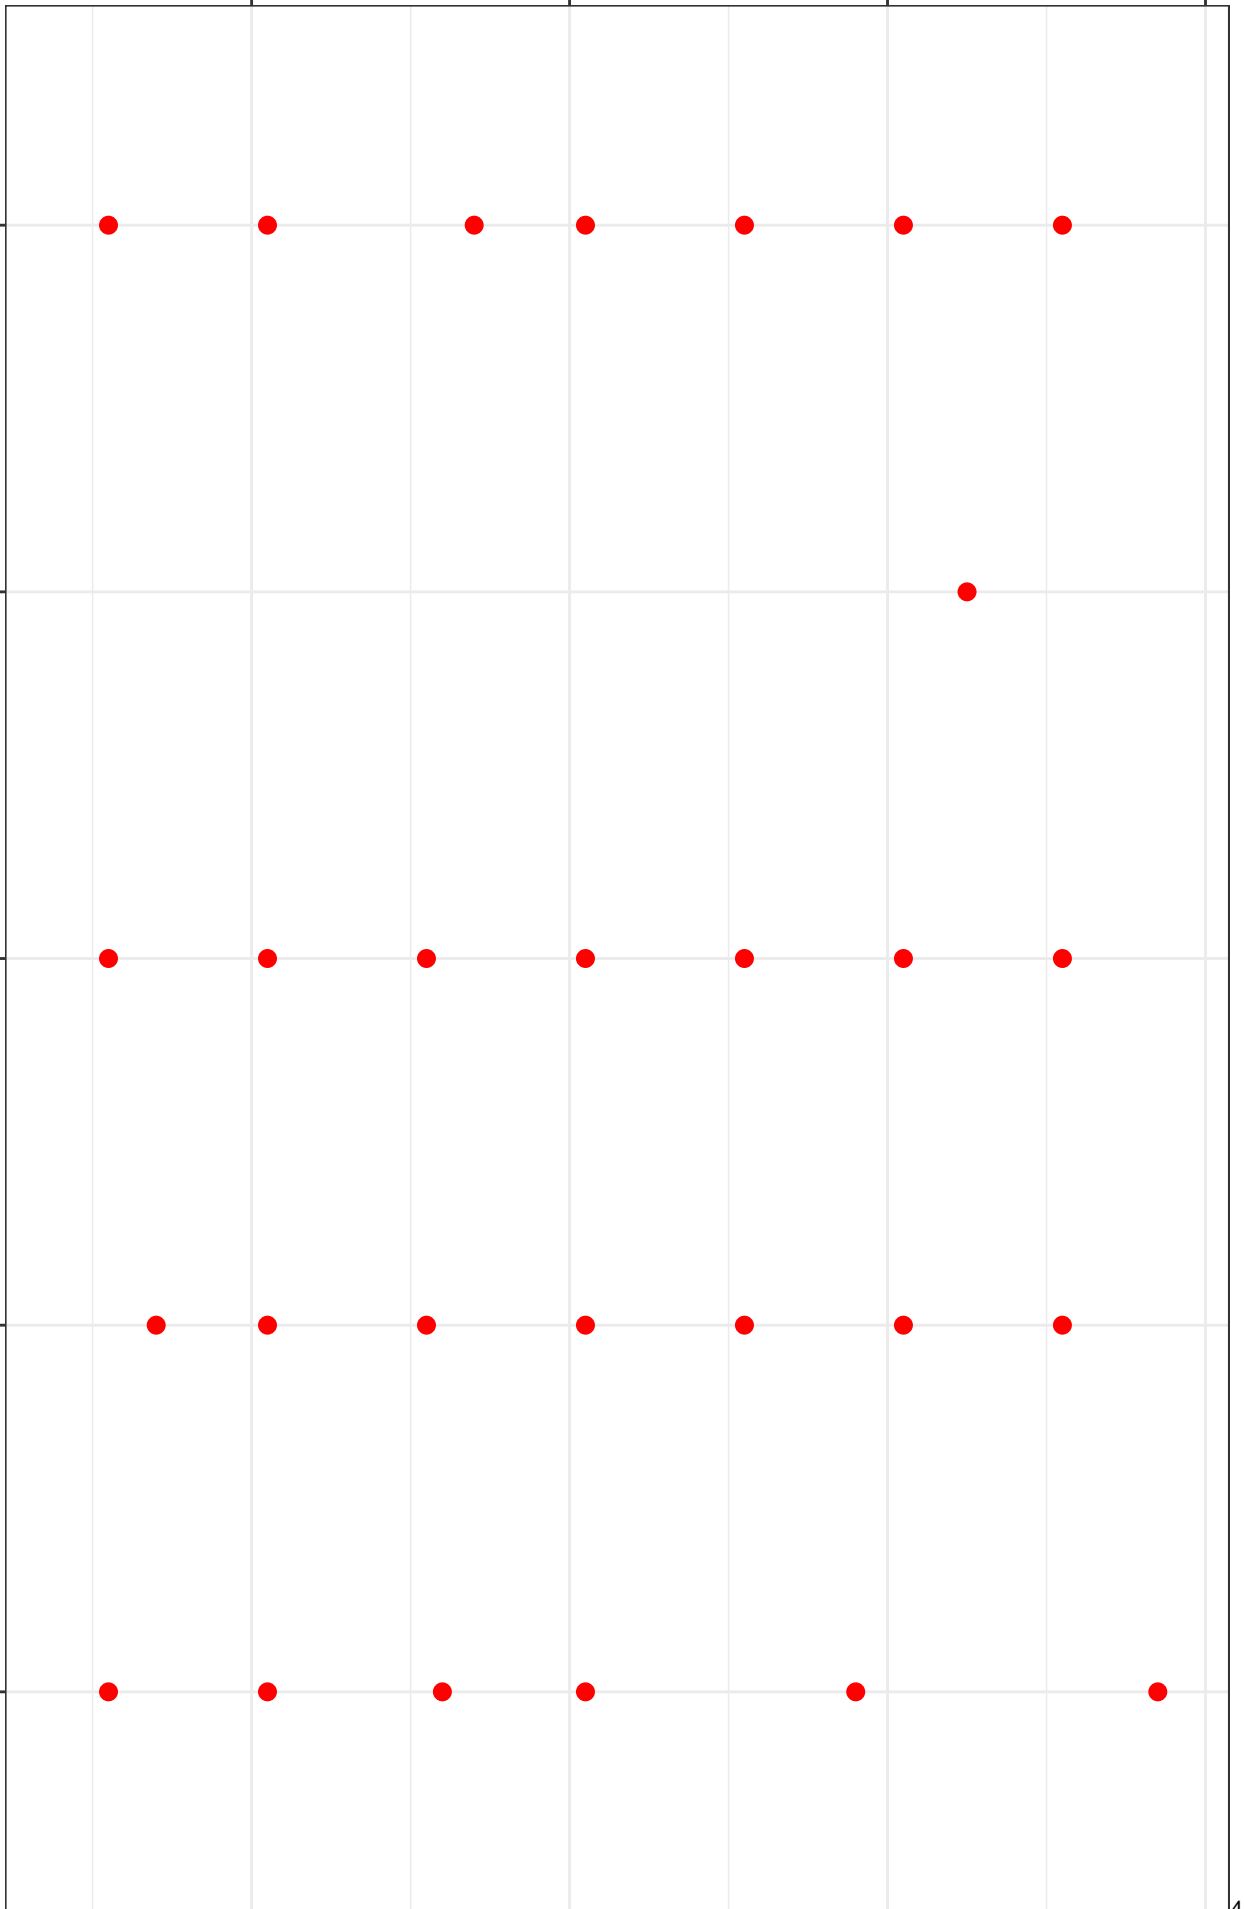

# Southeast Asia, East Asia, and Oceania

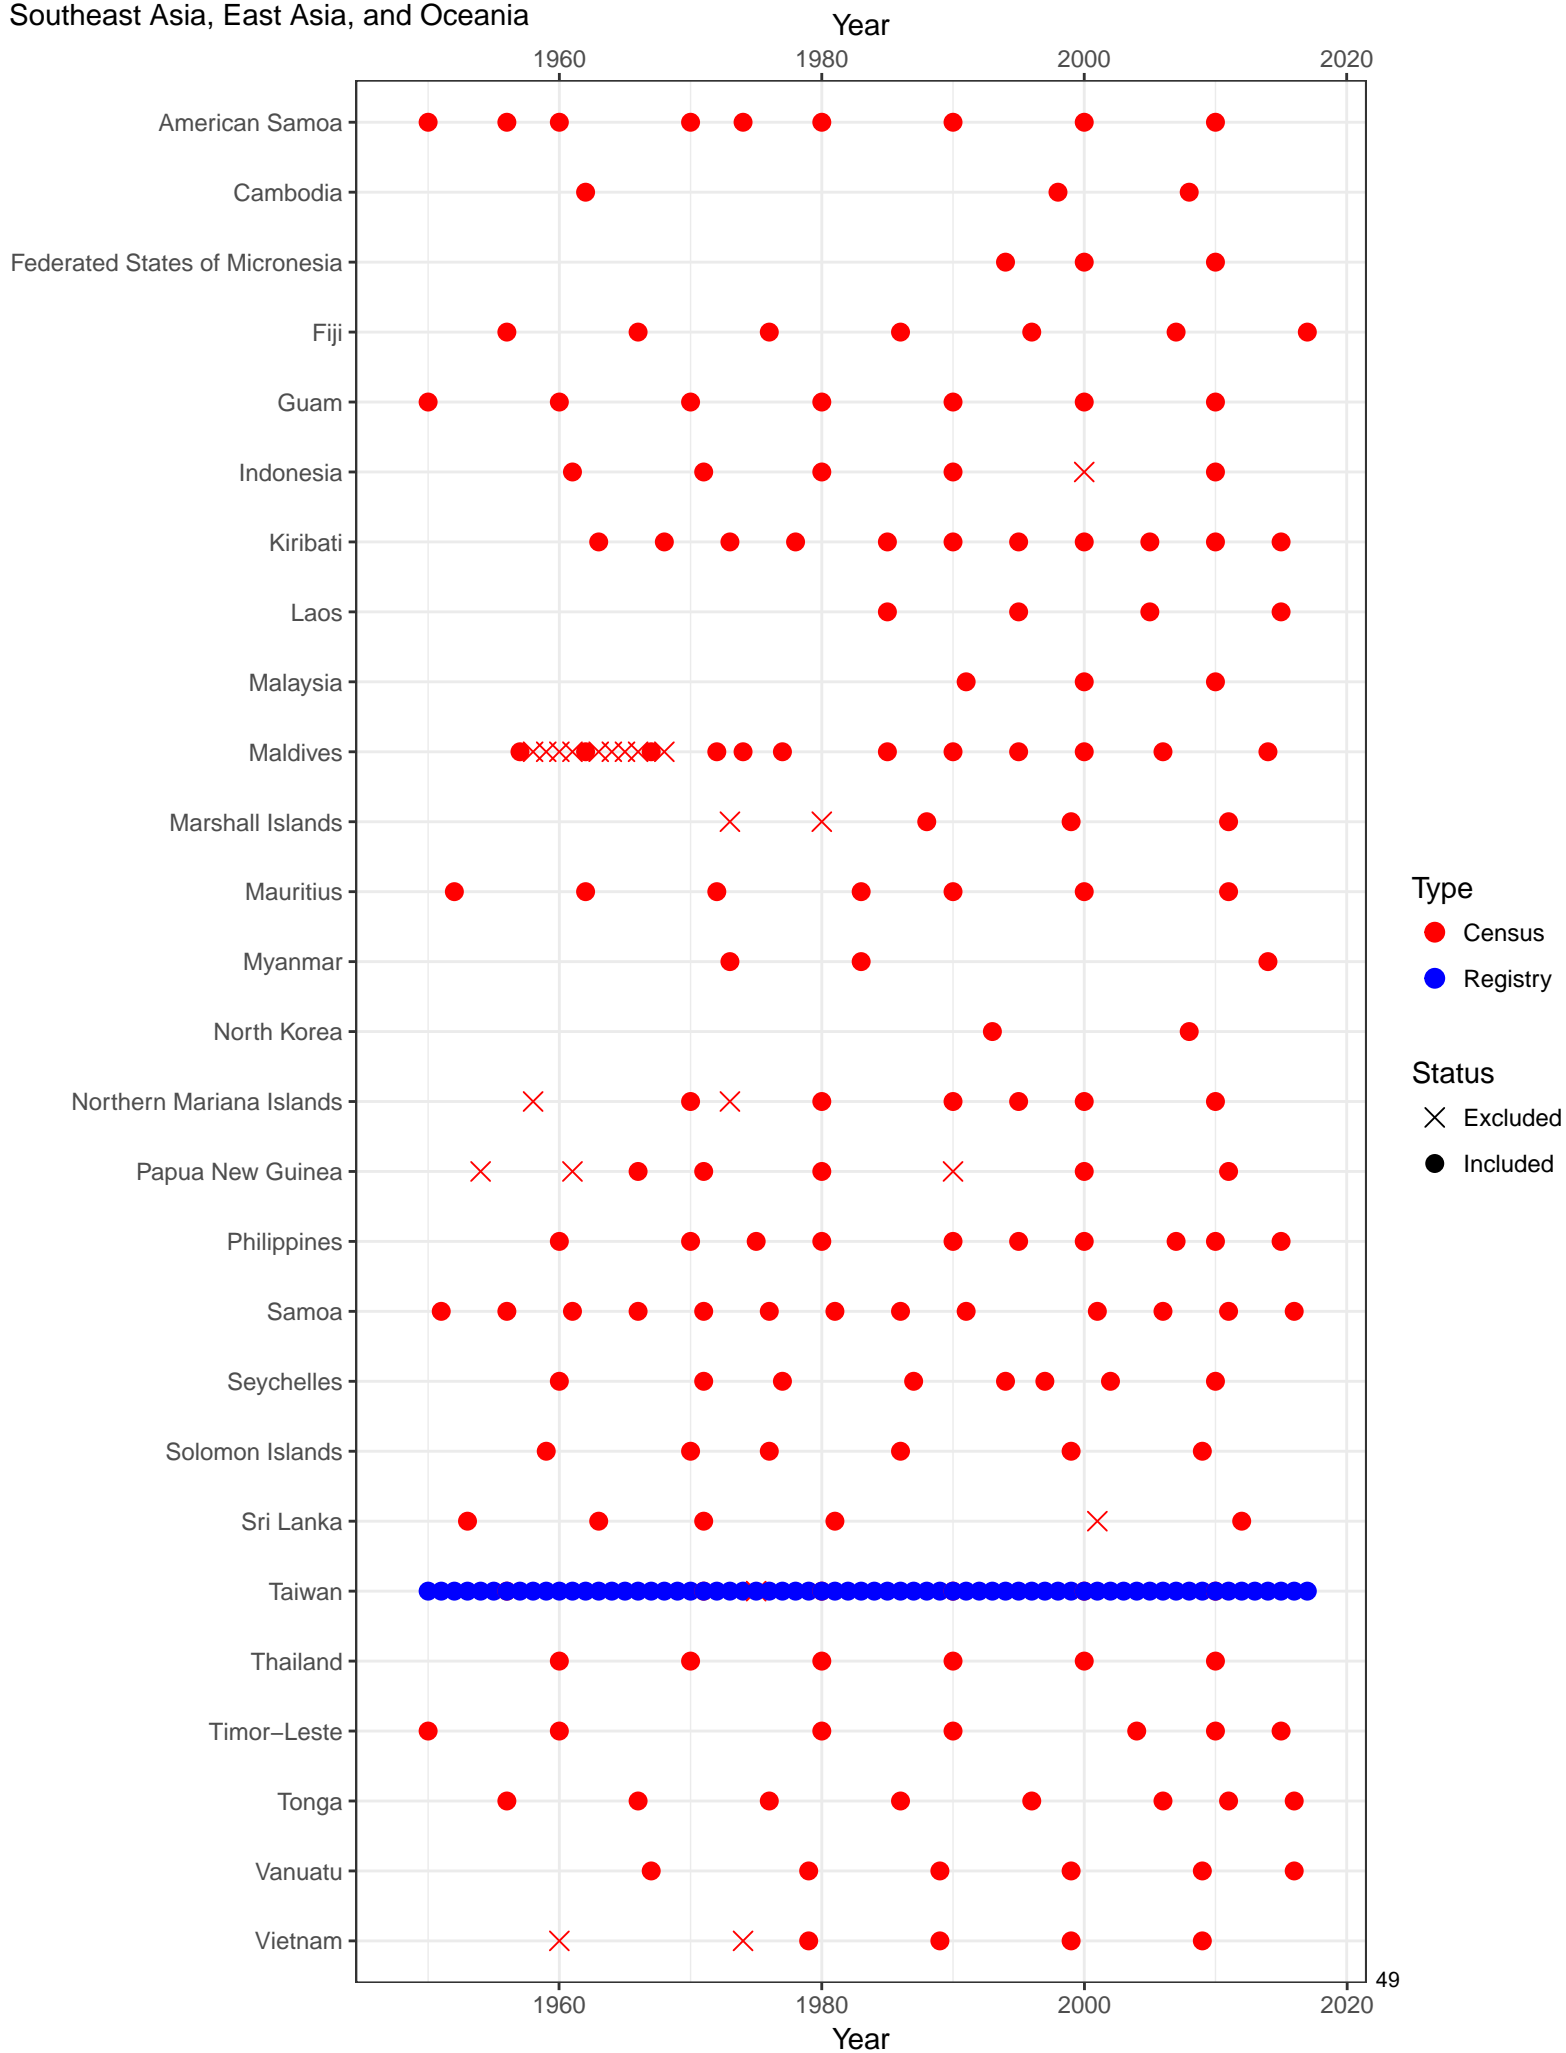

# Sub-Saharan Africa

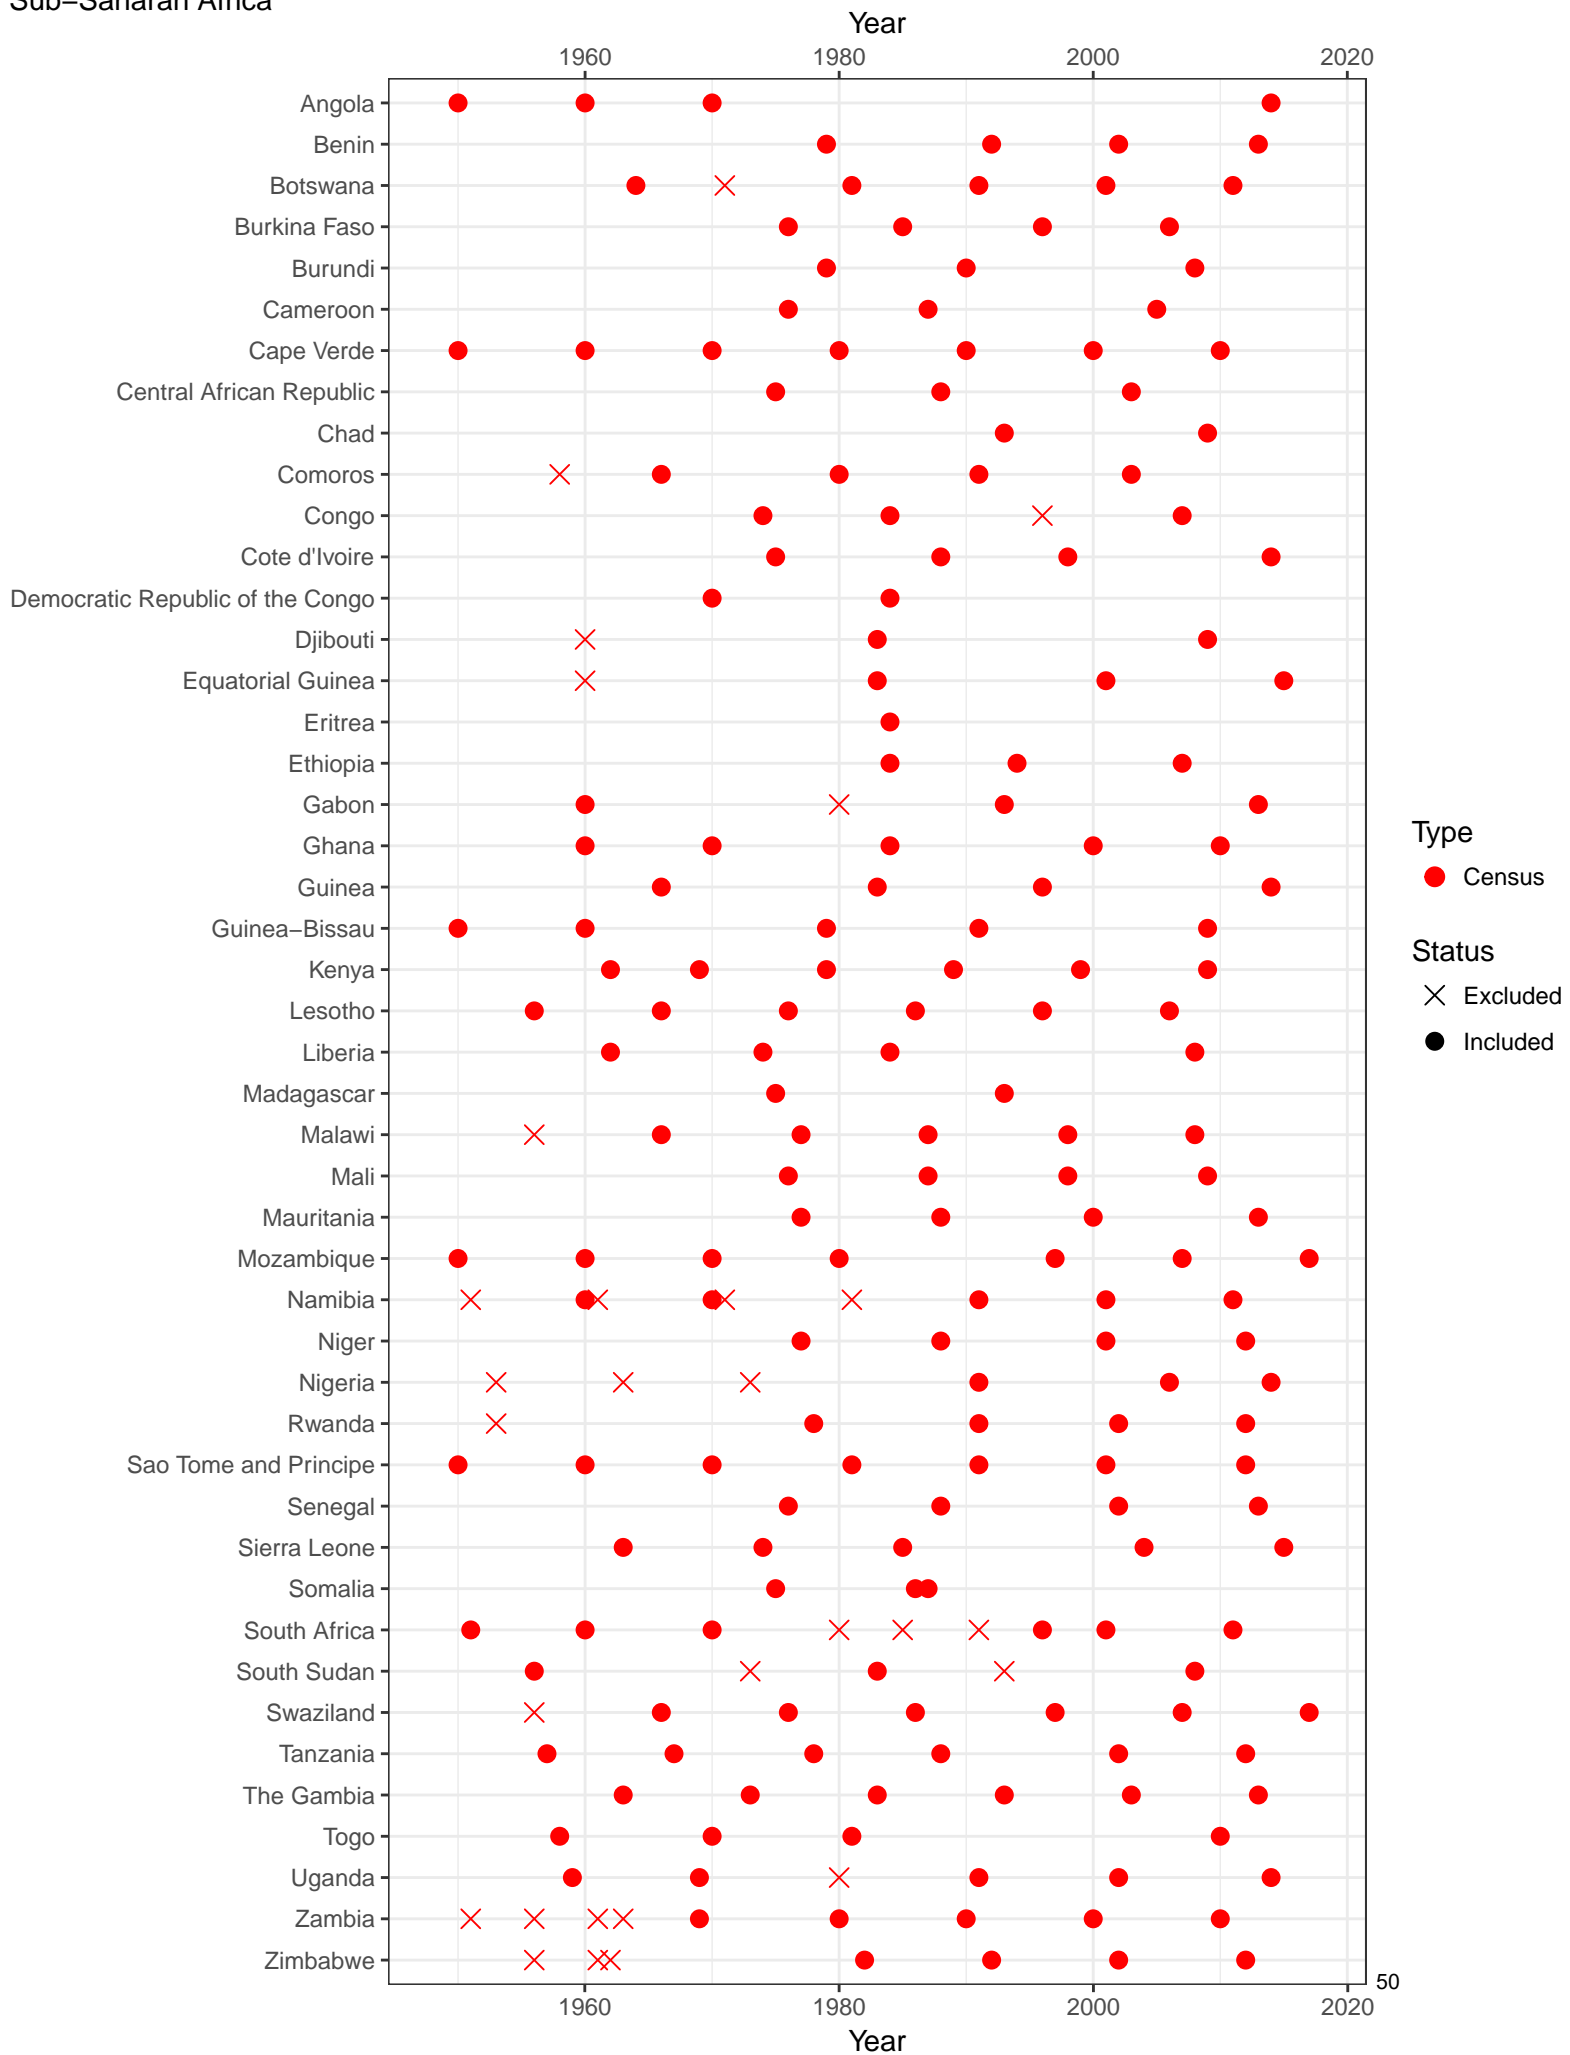

**Appendix Table 1. GBD location hierarchy with levels**

| Geography                                        | Level |
|--------------------------------------------------|-------|
| Global                                           | 0     |
| Low SDI                                          | 1     |
| Low-middle SDI                                   | 1     |
| Middle SDI                                       | 1     |
| High-middle SDI                                  | 1     |
| High SDI                                         | 1     |
| Central Europe, Eastern Europe, and Central Asia | 1     |
| Central Asia                                     | 2     |
| Armenia                                          | 3     |
| Azerbaijan                                       | 3     |
| Georgia                                          | 3     |
| Kazakhstan                                       | 3     |
| Kyrgyzstan                                       | 3     |
| Mongolia                                         | 3     |
| Tajikistan                                       | 3     |
| Turkmenistan                                     | 3     |
| Uzbekistan                                       | 3     |
| Central Europe                                   | 2     |
| Albania                                          | 3     |
| Bosnia and Herzegovina                           | 3     |
| Bulgaria                                         | 3     |
| Croatia                                          | 3     |
| Czech Republic                                   | 3     |
| Hungary                                          | 3     |
| Macedonia                                        | 3     |
| Montenegro                                       | 3     |
| Poland                                           | 3     |
| Romania                                          | 3     |
| Serbia                                           | 3     |
| Slovakia                                         | 3     |
| Slovenia                                         | 3     |
| Eastern Europe                                   | 2     |
| Belarus                                          | 3     |
| Estonia                                          | 3     |
| Latvia                                           | 3     |
| Lithuania                                        | 3     |
| Moldova                                          | 3     |
| Russian Federation                               | 3     |
| Ukraine                                          | 3     |
| High-income                                      | 1     |
| Australasia                                      | 2     |
| Australia                                        | 3     |
| New Zealand                                      | 3     |
| High-income Asia Pacific                         | 2     |

**Appendix Table 1. GBD location hierarchy with levels**

| Geography | Level |
|-----------|-------|
| Brunei    | 3     |
| Japan     | 3     |
| Aichi     | 4     |
| Akita     | 4     |
| Aomori    | 4     |
| Chiba     | 4     |
| Ehime     | 4     |
| Fukui     | 4     |
| Fukuoka   | 4     |
| Fukushima | 4     |
| Gifu      | 4     |
| Gunma     | 4     |
| Hiroshima | 4     |
| Hokkaidō  | 4     |
| Hyōgo     | 4     |
| Ibaraki   | 4     |
| Ishikawa  | 4     |
| Iwate     | 4     |
| Kagawa    | 4     |
| Kagoshima | 4     |
| Kanagawa  | 4     |
| Kōchi     | 4     |
| Kumamoto  | 4     |
| Kyōto     | 4     |
| Mie       | 4     |
| Miyagi    | 4     |
| Miyazaki  | 4     |
| Nagano    | 4     |
| Nagasaki  | 4     |
| Nara      | 4     |
| Niigata   | 4     |
| Ōita      | 4     |
| Okayama   | 4     |
| Okinawa   | 4     |
| Ōsaka     | 4     |
| Saga      | 4     |
| Saitama   | 4     |
| Shiga     | 4     |
| Shimane   | 4     |
| Shizuoka  | 4     |
| Tochigi   | 4     |
| Tokushima | 4     |
| Tōkyō     | 4     |
| Tottori   | 4     |
| Toyama    | 4     |

**Appendix Table 1. GBD location hierarchy with levels**

| Geography                 | Level |
|---------------------------|-------|
| Wakayama                  | 4     |
| Yamagata                  | 4     |
| Yamaguchi                 | 4     |
| Yamanashi                 | 4     |
| South Korea               | 3     |
| Singapore                 | 3     |
| High-income North America | 2     |
| Canada                    | 3     |
| Greenland                 | 3     |
| United States             | 3     |
| Alabama                   | 4     |
| Alaska                    | 4     |
| Arizona                   | 4     |
| Arkansas                  | 4     |
| California                | 4     |
| Colorado                  | 4     |
| Connecticut               | 4     |
| Delaware                  | 4     |
| District of Columbia      | 4     |
| Florida                   | 4     |
| Georgia                   | 4     |
| Hawaii                    | 4     |
| Idaho                     | 4     |
| Illinois                  | 4     |
| Indiana                   | 4     |
| Iowa                      | 4     |
| Kansas                    | 4     |
| Kentucky                  | 4     |
| Louisiana                 | 4     |
| Maine                     | 4     |
| Maryland                  | 4     |
| Massachusetts             | 4     |
| Michigan                  | 4     |
| Minnesota                 | 4     |
| Mississippi               | 4     |
| Missouri                  | 4     |
| Montana                   | 4     |
| Nebraska                  | 4     |
| Nevada                    | 4     |
| New Hampshire             | 4     |
| New Jersey                | 4     |
| New Mexico                | 4     |
| New York                  | 4     |
| North Carolina            | 4     |
| North Dakota              | 4     |

**Appendix Table 1. GBD location hierarchy with levels**

| Geography               | Level |
|-------------------------|-------|
| Ohio                    | 4     |
| Oklahoma                | 4     |
| Oregon                  | 4     |
| Pennsylvania            | 4     |
| Rhode Island            | 4     |
| South Carolina          | 4     |
| South Dakota            | 4     |
| Tennessee               | 4     |
| Texas                   | 4     |
| Utah                    | 4     |
| Vermont                 | 4     |
| Virginia                | 4     |
| Washington              | 4     |
| West Virginia           | 4     |
| Wisconsin               | 4     |
| Wyoming                 | 4     |
| Southern Latin America  | 2     |
| Argentina               | 3     |
| Chile                   | 3     |
| Uruguay                 | 3     |
| Western Europe          | 2     |
| Andorra                 | 3     |
| Austria                 | 3     |
| Belgium                 | 3     |
| Cyprus                  | 3     |
| Denmark                 | 3     |
| Finland                 | 3     |
| France                  | 3     |
| Germany                 | 3     |
| Greece                  | 3     |
| Iceland                 | 3     |
| Ireland                 | 3     |
| Israel                  | 3     |
| Italy                   | 3     |
| Luxembourg              | 3     |
| Malta                   | 3     |
| Netherlands             | 3     |
| Norway                  | 3     |
| Portugal                | 3     |
| Spain                   | 3     |
| Sweden                  | 3     |
| Stockholm               | 4     |
| Sweden except Stockholm | 4     |
| Switzerland             | 3     |
| United Kingdom          | 3     |

**Appendix Table 1. GBD location hierarchy with levels**

| <b>Geography</b>       | <b>Level</b> |
|------------------------|--------------|
| England                | 4            |
| East Midlands          | 5            |
| Derby                  | 6            |
| Derbyshire             | 6            |
| Leicester              | 6            |
| Leicestershire         | 6            |
| Lincolnshire           | 6            |
| Northamptonshire       | 6            |
| Nottingham             | 6            |
| Nottinghamshire        | 6            |
| Rutland                | 6            |
| East of England        | 5            |
| Bedford                | 6            |
| Cambridgeshire         | 6            |
| Central Bedfordshire   | 6            |
| Essex                  | 6            |
| Hertfordshire          | 6            |
| Luton                  | 6            |
| Norfolk                | 6            |
| Peterborough           | 6            |
| Southend-on-Sea        | 6            |
| Suffolk                | 6            |
| Thurrock               | 6            |
| Greater London         | 5            |
| Barking and Dagenham   | 6            |
| Barnet                 | 6            |
| Bexley                 | 6            |
| Brent                  | 6            |
| Bromley                | 6            |
| Camden                 | 6            |
| Croydon                | 6            |
| Ealing                 | 6            |
| Enfield                | 6            |
| Greenwich              | 6            |
| Hackney                | 6            |
| Hammersmith and Fulham | 6            |
| Haringey               | 6            |
| Harrow                 | 6            |
| Havering               | 6            |
| Hillingdon             | 6            |
| Hounslow               | 6            |
| Islington              | 6            |
| Kensington and Chelsea | 6            |
| Kingston upon Thames   | 6            |
| Lambeth                | 6            |



**Appendix Table 1. GBD location hierarchy with levels**

| Geography                 | Level |
|---------------------------|-------|
| Lewisham                  | 6     |
| Merton                    | 6     |
| Newham                    | 6     |
| Redbridge                 | 6     |
| Richmond upon Thames      | 6     |
| Southwark                 | 6     |
| Sutton                    | 6     |
| Tower Hamlets             | 6     |
| Waltham Forest            | 6     |
| Wandsworth                | 6     |
| Westminster               | 6     |
| North East England        | 5     |
| County Durham             | 6     |
| Darlington                | 6     |
| Gateshead                 | 6     |
| Hartlepool                | 6     |
| Middlesbrough             | 6     |
| Newcastle upon Tyne       | 6     |
| North Tyneside            | 6     |
| Northumberland            | 6     |
| Redcar and Cleveland      | 6     |
| South Tyneside            | 6     |
| Stockton-on-Tees          | 6     |
| Sunderland                | 6     |
| North West England        | 5     |
| Blackburn with Darwen     | 6     |
| Blackpool                 | 6     |
| Bolton                    | 6     |
| Bury                      | 6     |
| Cheshire East             | 6     |
| Cheshire West and Chester | 6     |
| Cumbria                   | 6     |
| Halton                    | 6     |
| Knowsley                  | 6     |
| Lancashire                | 6     |
| Liverpool                 | 6     |
| Manchester                | 6     |
| Oldham                    | 6     |
| Rochdale                  | 6     |
| Salford                   | 6     |
| Sefton                    | 6     |
| St Helens                 | 6     |
| Stockport                 | 6     |
| Tameside                  | 6     |
| Trafford                  | 6     |

**Appendix Table 1. GBD location hierarchy with levels**

| <b>Geography</b>             | <b>Level</b> |
|------------------------------|--------------|
| Warrington                   | 6            |
| Wigan                        | 6            |
| Wirral                       | 6            |
| South East England           | 5            |
| Bracknell Forest             | 6            |
| Brighton and Hove            | 6            |
| Buckinghamshire              | 6            |
| East Sussex                  | 6            |
| Hampshire                    | 6            |
| Isle of Wight                | 6            |
| Kent                         | 6            |
| Medway                       | 6            |
| Milton Keynes                | 6            |
| Oxfordshire                  | 6            |
| Portsmouth                   | 6            |
| Reading                      | 6            |
| Slough                       | 6            |
| Southampton                  | 6            |
| Surrey                       | 6            |
| West Berkshire               | 6            |
| West Sussex                  | 6            |
| Windsor and Maidenhead       | 6            |
| Wokingham                    | 6            |
| South West England           | 5            |
| Bath and North East Somerset | 6            |
| Bournemouth                  | 6            |
| Bristol, City of             | 6            |
| Cornwall                     | 6            |
| Devon                        | 6            |
| Dorset                       | 6            |
| Gloucestershire              | 6            |
| North Somerset               | 6            |
| Plymouth                     | 6            |
| Poole                        | 6            |
| Somerset                     | 6            |
| South Gloucestershire        | 6            |
| Swindon                      | 6            |
| Torbay                       | 6            |
| Wiltshire                    | 6            |
| West Midlands                | 5            |
| Birmingham                   | 6            |
| Coventry                     | 6            |
| Dudley                       | 6            |
| Herefordshire, County of     | 6            |
| Sandwell                     | 6            |

**Appendix Table 1. GBD location hierarchy with levels**

| <b>Geography</b>            | <b>Level</b> |
|-----------------------------|--------------|
| Shropshire                  | 6            |
| Solihull                    | 6            |
| Staffordshire               | 6            |
| Stoke-on-Trent              | 6            |
| Telford and Wrekin          | 6            |
| Walsall                     | 6            |
| Warwickshire                | 6            |
| Wolverhampton               | 6            |
| Worcestershire              | 6            |
| Yorkshire and the Humber    | 5            |
| Barnsley                    | 6            |
| Bradford                    | 6            |
| Calderdale                  | 6            |
| Doncaster                   | 6            |
| East Riding of Yorkshire    | 6            |
| Kingston upon Hull, City of | 6            |
| Kirklees                    | 6            |
| Leeds                       | 6            |
| North East Lincolnshire     | 6            |
| North Lincolnshire          | 6            |
| North Yorkshire             | 6            |
| Rotherham                   | 6            |
| Sheffield                   | 6            |
| Wakefield                   | 6            |
| York                        | 6            |
| Northern Ireland            | 4            |
| Scotland                    | 4            |
| Wales                       | 4            |
| Latin America and Caribbean | 1            |
| Andean Latin America        | 2            |
| Bolivia                     | 3            |
| Ecuador                     | 3            |
| Peru                        | 3            |
| Caribbean                   | 2            |
| Antigua and Barbuda         | 3            |
| The Bahamas                 | 3            |
| Barbados                    | 3            |
| Belize                      | 3            |
| Bermuda                     | 3            |
| Cuba                        | 3            |
| Dominica                    | 3            |
| Dominican Republic          | 3            |
| Grenada                     | 3            |
| Guyana                      | 3            |
| Haiti                       | 3            |

**Appendix Table 1. GBD location hierarchy with levels**

| Geography                        | Level |
|----------------------------------|-------|
| Jamaica                          | 3     |
| Puerto Rico                      | 3     |
| Saint Lucia                      | 3     |
| Saint Vincent and the Grenadines | 3     |
| Suriname                         | 3     |
| Trinidad and Tobago              | 3     |
| Virgin Islands, U.S.             | 3     |
| Central Latin America            | 2     |
| Colombia                         | 3     |
| Costa Rica                       | 3     |
| El Salvador                      | 3     |
| Guatemala                        | 3     |
| Honduras                         | 3     |
| Mexico                           | 3     |
| Aguascalientes                   | 4     |
| Baja California                  | 4     |
| Baja California Sur              | 4     |
| Campeche                         | 4     |
| Chiapas                          | 4     |
| Chihuahua                        | 4     |
| Coahuila                         | 4     |
| Colima                           | 4     |
| Mexico City                      | 4     |
| Durango                          | 4     |
| Guanajuato                       | 4     |
| Guerrero                         | 4     |
| Hidalgo                          | 4     |
| Jalisco                          | 4     |
| México                           | 4     |
| Michoacán de Ocampo              | 4     |
| Morelos                          | 4     |
| Nayarit                          | 4     |
| Nuevo León                       | 4     |
| Oaxaca                           | 4     |
| Puebla                           | 4     |
| Querétaro                        | 4     |
| Quintana Roo                     | 4     |
| San Luis Potosí                  | 4     |
| Sinaloa                          | 4     |
| Sonora                           | 4     |
| Tabasco                          | 4     |
| Tamaulipas                       | 4     |
| Tlaxcala                         | 4     |
| Veracruz de Ignacio de la Llave  | 4     |
| Yucatán                          | 4     |

**Appendix Table 1. GBD location hierarchy with levels**

| Geography                    | Level |
|------------------------------|-------|
| Zacatecas                    | 4     |
| Nicaragua                    | 3     |
| Panama                       | 3     |
| Venezuela                    | 3     |
| Tropical Latin America       | 2     |
| Brazil                       | 3     |
| Acre                         | 4     |
| Alagoas                      | 4     |
| Amapá                        | 4     |
| Amazonas                     | 4     |
| Bahia                        | 4     |
| Ceará                        | 4     |
| Distrito Federal             | 4     |
| Espírito Santo               | 4     |
| Goiás                        | 4     |
| Maranhão                     | 4     |
| Mato Grosso                  | 4     |
| Mato Grosso do Sul           | 4     |
| Minas Gerais                 | 4     |
| Pará                         | 4     |
| Paraíba                      | 4     |
| Paraná                       | 4     |
| Pernambuco                   | 4     |
| Piauí                        | 4     |
| Rio de Janeiro               | 4     |
| Rio Grande do Norte          | 4     |
| Rio Grande do Sul            | 4     |
| Rondônia                     | 4     |
| Roraima                      | 4     |
| Santa Catarina               | 4     |
| São Paulo                    | 4     |
| Sergipe                      | 4     |
| Tocantins                    | 4     |
| Paraguay                     | 3     |
| North Africa and Middle East | 1     |
| North Africa and Middle East | 2     |
| Afghanistan                  | 3     |
| Algeria                      | 3     |
| Bahrain                      | 3     |
| Egypt                        | 3     |
| Iran                         | 3     |
| Iraq                         | 3     |
| Jordan                       | 3     |
| Kuwait                       | 3     |
| Lebanon                      | 3     |

**Appendix Table 1. GBD location hierarchy with levels**

| Geography            | Level |
|----------------------|-------|
| Libya                | 3     |
| Morocco              | 3     |
| Palestine            | 3     |
| Oman                 | 3     |
| Qatar                | 3     |
| Saudi Arabia         | 3     |
| Sudan                | 3     |
| Syria                | 3     |
| Tunisia              | 3     |
| Turkey               | 3     |
| United Arab Emirates | 3     |
| Yemen                | 3     |
| South Asia           | 1     |
| South Asia           | 2     |
| Bangladesh           | 3     |
| Bhutan               | 3     |
| India                | 3     |
| Andhra Pradesh       | 4     |
| Arunachal Pradesh    | 4     |
| Assam                | 4     |
| Bihar                | 4     |
| Chhattisgarh         | 4     |
| Delhi                | 4     |
| Goa                  | 4     |
| Gujarat              | 4     |
| Haryana              | 4     |
| Himachal Pradesh     | 4     |
| Jammu and Kashmir    | 4     |
| Jharkhand            | 4     |
| Karnataka            | 4     |
| Kerala               | 4     |
| Madhya Pradesh       | 4     |
| Maharashtra          | 4     |
| Manipur              | 4     |
| Meghalaya            | 4     |
| Mizoram              | 4     |
| Nagaland             | 4     |
| Odisha               | 4     |
| Punjab               | 4     |
| Rajasthan            | 4     |
| Sikkim               | 4     |
| Tamil Nadu           | 4     |
| Telangana            | 4     |
| Tripura              | 4     |
| Uttar Pradesh        | 4     |

**Appendix Table 1. GBD location hierarchy with levels**

| Geography                              | Level |
|----------------------------------------|-------|
| Uttarakhand                            | 4     |
| West Bengal                            | 4     |
| Union Territories other than Delhi     | 4     |
| Nepal                                  | 3     |
| Pakistan                               | 3     |
| Southeast Asia, East Asia, and Oceania | 1     |
| East Asia                              | 2     |
| China                                  | 3     |
| North Korea                            | 3     |
| Taiwan                                 | 3     |
| Oceania                                | 2     |
| American Samoa                         | 3     |
| Federated States of Micronesia         | 3     |
| Fiji                                   | 3     |
| Guam                                   | 3     |
| Kiribati                               | 3     |
| Marshall Islands                       | 3     |
| Northern Mariana Islands               | 3     |
| Papua New Guinea                       | 3     |
| Samoa                                  | 3     |
| Solomon Islands                        | 3     |
| Tonga                                  | 3     |
| Vanuatu                                | 3     |
| Southeast Asia                         | 2     |
| Cambodia                               | 3     |
| Indonesia                              | 3     |
| Laos                                   | 3     |
| Malaysia                               | 3     |
| Maldives                               | 3     |
| Mauritius                              | 3     |
| Myanmar                                | 3     |
| Philippines                            | 3     |
| Sri Lanka                              | 3     |
| Seychelles                             | 3     |
| Thailand                               | 3     |
| Timor-Leste                            | 3     |
| Vietnam                                | 3     |
| Sub-Saharan Africa                     | 1     |
| Central Sub-Saharan Africa             | 2     |
| Angola                                 | 3     |
| Central African Republic               | 3     |
| Congo                                  | 3     |
| Democratic Republic of the Congo       | 3     |
| Equatorial Guinea                      | 3     |
| Gabon                                  | 3     |

**Appendix Table 1. GBD location hierarchy with levels**

| <b>Geography</b>           | <b>Level</b> |
|----------------------------|--------------|
| Eastern Sub-Saharan Africa | 2            |
| Burundi                    | 3            |
| Comoros                    | 3            |
| Djibouti                   | 3            |
| Eritrea                    | 3            |
| Ethiopia                   | 3            |
| Kenya                      | 3            |
| Baringo                    | 4            |
| Bomet                      | 4            |
| Bungoma                    | 4            |
| Busia                      | 4            |
| Elgeyo-Marakwet            | 4            |
| Embu                       | 4            |
| Garissa                    | 4            |
| HomaBay                    | 4            |
| Isiolo                     | 4            |
| Kajiado                    | 4            |
| Kakamega                   | 4            |
| Kericho                    | 4            |
| Kiambu                     | 4            |
| Kilifi                     | 4            |
| Kirinyaga                  | 4            |
| Kisii                      | 4            |
| Kisumu                     | 4            |
| Kitui                      | 4            |
| Kwale                      | 4            |
| Laikipia                   | 4            |
| Lamu                       | 4            |
| Machakos                   | 4            |
| Makueni                    | 4            |
| Mandera                    | 4            |
| Marsabit                   | 4            |
| Meru                       | 4            |
| Migori                     | 4            |
| Mombasa                    | 4            |
| Murang'a                   | 4            |
| Nairobi                    | 4            |
| Nakuru                     | 4            |
| Nandi                      | 4            |
| Narok                      | 4            |
| Nyamira                    | 4            |
| Nyandarua                  | 4            |
| Nyeri                      | 4            |
| Samburu                    | 4            |
| Siaya                      | 4            |



**Appendix Table 1. GBD location hierarchy with levels**

| Geography                   | Level |
|-----------------------------|-------|
| TaitaTaveta                 | 4     |
| TanaRiver                   | 4     |
| TharakaNithi                | 4     |
| TransNzoia                  | 4     |
| Turkana                     | 4     |
| UasinGishu                  | 4     |
| Vihiga                      | 4     |
| Wajir                       | 4     |
| WestPokot                   | 4     |
| Madagascar                  | 3     |
| Malawi                      | 3     |
| Mozambique                  | 3     |
| Rwanda                      | 3     |
| Somalia                     | 3     |
| South Sudan                 | 3     |
| Tanzania                    | 3     |
| Uganda                      | 3     |
| Zambia                      | 3     |
| Southern Sub-Saharan Africa | 2     |
| Botswana                    | 3     |
| Lesotho                     | 3     |
| Namibia                     | 3     |
| South Africa                | 3     |
| Swaziland                   | 3     |
| Zimbabwe                    | 3     |
| Western Sub-Saharan Africa  | 2     |
| Benin                       | 3     |
| Burkina Faso                | 3     |
| Cameroon                    | 3     |
| Cape Verde                  | 3     |
| Chad                        | 3     |
| Cote d'Ivoire               | 3     |
| The Gambia                  | 3     |
| Ghana                       | 3     |
| Guinea                      | 3     |
| Guinea-Bissau               | 3     |
| Liberia                     | 3     |
| Mali                        | 3     |
| Mauritania                  | 3     |
| Niger                       | 3     |
| Nigeria                     | 3     |
| Sao Tome and Principe       | 3     |
| Senegal                     | 3     |
| Sierra Leone                | 3     |
| Togo                        | 3     |

Appendix Table 2. GATHER checklist of information that should be included in reports of global health estimates, with description of compliance and location of information for GBD 2017.

| #                                                                                                     | GATHER checklist item                                                                                                                                                                                                                                                                                                                         | Description of compliance                                                                                                                  | Reference                                                                                                         |
|-------------------------------------------------------------------------------------------------------|-----------------------------------------------------------------------------------------------------------------------------------------------------------------------------------------------------------------------------------------------------------------------------------------------------------------------------------------------|--------------------------------------------------------------------------------------------------------------------------------------------|-------------------------------------------------------------------------------------------------------------------|
| <b>Objectives and funding</b>                                                                         |                                                                                                                                                                                                                                                                                                                                               |                                                                                                                                            |                                                                                                                   |
| 1                                                                                                     | Define the indicators, populations, and time periods for which estimates were made.                                                                                                                                                                                                                                                           | Narrative provided in paper and methods appendix describing indicators, definitions, and populations                                       | Main text (Methods—Overview, Geographical units and time periods) and methods appendix                            |
| 2                                                                                                     | List the funding sources for the work.                                                                                                                                                                                                                                                                                                        | Funding sources listed in paper                                                                                                            | Main text (Summary)                                                                                               |
| <b>Data Inputs</b>                                                                                    |                                                                                                                                                                                                                                                                                                                                               |                                                                                                                                            |                                                                                                                   |
| <i>For all data inputs from multiple sources that are synthesized as part of the study:</i>           |                                                                                                                                                                                                                                                                                                                                               |                                                                                                                                            |                                                                                                                   |
| 3                                                                                                     | Describe how the data were identified and how the data were accessed.                                                                                                                                                                                                                                                                         | Narrative provided in paper and methods appendix describing data seeking methods                                                           | Main text (Methods) and methods appendix                                                                          |
| 4                                                                                                     | Specify the inclusion and exclusion criteria. Identify all ad-hoc exclusions.                                                                                                                                                                                                                                                                 | Narrative provided in paper and methods appendix describing inclusion and exclusion type                                                   | Main text (Methods) and methods appendix                                                                          |
| 5                                                                                                     | Provide information on all included data sources and their main characteristics. For each data source used, report reference information or contact name/institution, population represented, data collection method, year(s) of data collection, sex and age range, diagnostic criteria or measurement method, and sample size, as relevant. | Metadata for data sources by component, geography, cause, risk, or impairment is available through an interactive, online data source tool | Online data citation tools, <a href="http://ghdx.healthdata.org/gbd-2017">http://ghdx.healthdata.org/gbd-2017</a> |
| 6                                                                                                     | Identify and describe any categories of input data that have potentially important biases (e.g., based on characteristics listed in item 5).                                                                                                                                                                                                  | Summary of known biases included in methods appendix                                                                                       | Methods appendix                                                                                                  |
| <i>For data inputs that contribute to the analysis but were not synthesized as part of the study:</i> |                                                                                                                                                                                                                                                                                                                                               |                                                                                                                                            |                                                                                                                   |
| 7                                                                                                     | Describe and give sources for any other data inputs.                                                                                                                                                                                                                                                                                          | Included in online data source tool                                                                                                        | Online data citation tools, <a href="http://ghdx.healthdata.org/gbd-2017">http://ghdx.healthdata.org/gbd-2017</a> |
| <i>For all data inputs:</i>                                                                           |                                                                                                                                                                                                                                                                                                                                               |                                                                                                                                            |                                                                                                                   |
| 8                                                                                                     | Provide all data inputs in a file format from which data can be efficiently extracted (e.g., a spreadsheet as opposed to a PDF), including all relevant meta-data listed in item 5. For any data inputs that cannot be shared due to ethical or legal reasons, such as third-party ownership, provide a contact                               | Downloads of input data available through online tools, including data visualization tools                                                 | Online data visualization tools, data query tools, and the Global Health Data Exchange,                           |

|                               |                                                                                                                                                                                                                                                                         |                                                                                                                                |                                                                                                                                                                                                                              |
|-------------------------------|-------------------------------------------------------------------------------------------------------------------------------------------------------------------------------------------------------------------------------------------------------------------------|--------------------------------------------------------------------------------------------------------------------------------|------------------------------------------------------------------------------------------------------------------------------------------------------------------------------------------------------------------------------|
|                               | name or the name of the institution that retains the right to the data.                                                                                                                                                                                                 | and data query tools; input data not available in tools will be made available upon request                                    | <a href="http://ghdx.healthdata.org">http://ghdx.healthdata.org</a>                                                                                                                                                          |
| <b>Data analysis</b>          |                                                                                                                                                                                                                                                                         |                                                                                                                                |                                                                                                                                                                                                                              |
| 9                             | Provide a conceptual overview of the data analysis method. A diagram may be helpful.                                                                                                                                                                                    | Flow diagrams of the overall methodological processes, as well as cause-specific modelling processes, have been provided       | Main text (Methods) and methods appendix                                                                                                                                                                                     |
| 10                            | Provide a detailed description of all steps of the analysis, including mathematical formulae. This description should cover, as relevant, data cleaning, data pre-processing, data adjustments and weighting of data sources, and mathematical or statistical model(s). | Flow diagrams and corresponding methodological write-ups have been provided                                                    | Main text (Methods) and methods appendix                                                                                                                                                                                     |
| 11                            | Describe how candidate models were evaluated and how the final model(s) were selected.                                                                                                                                                                                  | Details on evaluation of model performance have been provided                                                                  | Methods appendix                                                                                                                                                                                                             |
| 12                            | Provide the results of an evaluation of model performance, if done, as well as the results of any relevant sensitivity analysis.                                                                                                                                        | Details on evaluation of model performance have been provided                                                                  | Methods appendix                                                                                                                                                                                                             |
| 13                            | Describe methods for calculating uncertainty of the estimates. State which sources of uncertainty were, and were not, accounted for in the uncertainty analysis.                                                                                                        | Details on uncertainty calculations have been provide                                                                          | Methods appendix                                                                                                                                                                                                             |
| 14                            | State how analytic or statistical source code used to generate estimates can be accessed.                                                                                                                                                                               | Access statement provided                                                                                                      | Code is provided in an online repository, <a href="http://ghdx.healthdata.org/gbd-2017">http://ghdx.healthdata.org/gbd-2017</a>                                                                                              |
| <b>Results and Discussion</b> |                                                                                                                                                                                                                                                                         |                                                                                                                                |                                                                                                                                                                                                                              |
| 15                            | Provide published estimates in a file format from which data can be efficiently extracted.                                                                                                                                                                              | Results are available through online data visualization tools, the Global Health Data Exchange, and the online data query tool | Online data tools (data visualization tools, data query tools, and the Global Health Data Exchange, <a href="http://ghdx.healthdata.org/gbd-2017">http://ghdx.healthdata.org/gbd-2017</a> )                                  |
| 16                            | Report a quantitative measure of the uncertainty of the estimates (e.g. uncertainty intervals).                                                                                                                                                                         | Uncertainty intervals are provided with all results                                                                            | Main text, methods appendix, and online data tools (data visualization tools, data query tools, and the Global Health Data Exchange, <a href="http://ghdx.healthdata.org/gbd-2017">http://ghdx.healthdata.org/gbd-2017</a> ) |

|    |                                                                                                                                                          |                                                                                                                                        |                                                         |
|----|----------------------------------------------------------------------------------------------------------------------------------------------------------|----------------------------------------------------------------------------------------------------------------------------------------|---------------------------------------------------------|
| 17 | Interpret results in light of existing evidence. If updating a previous set of estimates, describe the reasons for changes in estimates.                 | Discussion of methodological differences between GBD estimates and other available evidence provided in the paper and methods appendix | Main text (Methods and Discussion) and methods appendix |
| 18 | Discuss limitations of the estimates. Include a discussion of any modelling assumptions or data limitations that affect interpretation of the estimates. | Discussion of limitations provided was provided                                                                                        | Main text (Limitations) and methods appendix            |

**Appendix Table 3. Number of unique sources used for the analysis of age-specific fertility for each location**

Reference sources are bolded and italicized

| Location                       | Vital Registrations | Complete Birth Histories | Summary Birth Histories | Censuses | Other     | Sample Registrations |
|--------------------------------|---------------------|--------------------------|-------------------------|----------|-----------|----------------------|
| Afghanistan                    | 1                   | <b>2</b>                 | 5                       | 1        | 0         | 0                    |
| Albania                        | 60                  | <b>2</b>                 | 4                       | 2        | 0         | 0                    |
| Algeria                        | <b>50</b>           | <b>2</b>                 | 3                       | 0        | 0         | 0                    |
| American Samoa                 | <b>56</b>           | 0                        | 0                       | <b>1</b> | 0         | 0                    |
| Andorra                        | <b>43</b>           | 0                        | 0                       | 0        | 0         | 0                    |
| Angola                         | 22                  | <b>3</b>                 | 4                       | 0        | 0         | 0                    |
| Antigua and Barbuda            | <b>50</b>           | 0                        | 0                       | 0        | 0         | 0                    |
| Argentina                      | <b>59</b>           | 0                        | 2                       | 4        | 0         | 0                    |
| Armenia                        | <b>57</b>           | <b>4</b>                 | 2                       | 2        | 0         | 0                    |
| Australia                      | <b>66</b>           | 0                        | 0                       | 2        | 0         | 0                    |
| Austria                        | <b>67</b>           | 0                        | 0                       | 2        | 0         | 0                    |
| Azerbaijan                     | <b>58</b>           | <b>1</b>                 | 4                       | 2        | 0         | 0                    |
| Bahrain                        | <b>48</b>           | 0                        | 2                       | 2        | 1         | 0                    |
| Bangladesh                     | <b>35</b>           | <b>10</b>                | 9                       | 2        | 33        | 0                    |
| Barbados                       | <b>63</b>           | 0                        | 1                       | 1        | 0         | 0                    |
| Belarus                        | <b>67</b>           | 0                        | <b>3</b>                | <b>1</b> | 0         | 0                    |
| Belgium                        | <b>67</b>           | 0                        | 0                       | 1        | 0         | 0                    |
| Belize                         | <b>64</b>           | 0                        | <b>4</b>                | <b>3</b> | 0         | 0                    |
| Benin                          | 2                   | <b>5</b>                 | <b>4</b>                | 1        | 0         | 0                    |
| Bermuda                        | <b>58</b>           | 0                        | 0                       | <b>3</b> | 0         | 0                    |
| Bhutan                         | <b>1</b>            | 0                        | <b>1</b>                | <b>1</b> | 0         | 0                    |
| Bolivia                        | 48                  | <b>5</b>                 | 7                       | 4        | 1         | 0                    |
| Bosnia and Herzegovina         | <b>28</b>           | 1                        | 1                       | 0        | 1         | 0                    |
| Botswana                       | <b>16</b>           | <b>1</b>                 | <b>7</b>                | <b>3</b> | 0         | 0                    |
| Brazil                         | 53                  | <b>4</b>                 | <b>15</b>               | <b>3</b> | 0         | 0                    |
| Brunei                         | <b>57</b>           | 0                        | 0                       | 1        | 0         | 0                    |
| Bulgaria                       | <b>67</b>           | 0                        | 2                       | 1        | 0         | 0                    |
| Burkina Faso                   | 0                   | <b>5</b>                 | <b>7</b>                | <b>4</b> | 0         | 0                    |
| Burundi                        | 5                   | <b>2</b>                 | 8                       | <b>1</b> | 0         | 0                    |
| Cambodia                       | 1                   | <b>5</b>                 | 5                       | 2        | 0         | 0                    |
| Cameroon                       | 0                   | <b>7</b>                 | <b>3</b>                | 2        | 0         | 0                    |
| Canada                         | <b>65</b>           | 0                        | 0                       | 2        | 0         | 0                    |
| Cape Verde                     | <b>42</b>           | 0                        | 2                       | <b>1</b> | 0         | 0                    |
| Central African Republic       | 0                   | <b>1</b>                 | 4                       | <b>2</b> | 0         | 0                    |
| Chad                           | 0                   | <b>3</b>                 | <b>3</b>                | 0        | 0         | 0                    |
| Chile                          | <b>66</b>           | 0                        | 1                       | 4        | 0         | 0                    |
| China                          | <b>40</b>           | 9                        | 2                       | <b>4</b> | <b>22</b> | 0                    |
| Colombia                       | 59                  | <b>8</b>                 | 6                       | 4        | 0         | 0                    |
| Comoros                        | 9                   | <b>2</b>                 | 2                       | 1        | 0         | 0                    |
| Congo (Brazzaville)            | 0                   | <b>2</b>                 | <b>3</b>                | 0        | 0         | 0                    |
| Costa Rica                     | <b>62</b>           | 1                        | 6                       | 4        | 0         | 0                    |
| Cote d'Ivoire                  | 1                   | <b>6</b>                 | 5                       | <b>1</b> | 0         | 1                    |
| Croatia                        | <b>36</b>           | 0                        | 0                       | 1        | 1         | 0                    |
| Cuba                           | <b>65</b>           | 0                        | 3                       | 1        | 0         | 0                    |
| Cyprus                         | <b>67</b>           | 0                        | 1                       | 2        | 39        | 0                    |
| Czech Republic                 | <b>67</b>           | 0                        | 2                       | 1        | 0         | 0                    |
| Denmark                        | <b>67</b>           | 0                        | 0                       | 0        | 16        | 0                    |
| Djibouti                       | 28                  | <b>1</b>                 | 3                       | 0        | 0         | 0                    |
| Dominica                       | <b>50</b>           | 0                        | 0                       | 2        | 0         | 0                    |
| Dominican Republic             | 52                  | <b>10</b>                | 5                       | 4        | 0         | 0                    |
| DR Congo                       | 0                   | <b>2</b>                 | <b>7</b>                | 0        | 0         | 0                    |
| Ecuador                        | <b>58</b>           | 6                        | <b>10</b>               | <b>5</b> | 0         | 0                    |
| Egypt                          | <b>62</b>           | 9                        | 8                       | 2        | 0         | 0                    |
| El Salvador                    | <b>58</b>           | <b>6</b>                 | 4                       | 3        | 0         | 0                    |
| Equatorial Guinea              | 17                  | <b>1</b>                 | 1                       | 0        | 0         | 0                    |
| Eritrea                        | 0                   | <b>2</b>                 | 2                       | 0        | 0         | 0                    |
| Estonia                        | <b>67</b>           | 0                        | 1                       | 1        | 0         | 0                    |
| Ethiopia                       | 0                   | <b>5</b>                 | 4                       | 3        | 0         | 0                    |
| Federated States of Micronesia | 8                   | 0                        | <b>1</b>                | <b>3</b> | 0         | 0                    |
| Fiji                           | <b>59</b>           | <b>1</b>                 | 3                       | 4        | 0         | 0                    |

**Appendix Table 3. Number of unique sources used for the analysis of age-specific fertility for each location**

Reference sources are bolded and italicized

| Location                                         | Vital Registrations | Complete Birth Histories | Summary Birth Histories | Censuses | Other    | Sample Registrations |
|--------------------------------------------------|---------------------|--------------------------|-------------------------|----------|----------|----------------------|
| Finland                                          | <i>67</i>           | 0                        | 0                       | 1        | 0        | 0                    |
| France                                           | <i>67</i>           | 0                        | 0                       | 0        | 0        | 0                    |
| Gabon                                            | 0                   | 2                        | 1                       | <i>1</i> | 0        | 0                    |
| Georgia                                          | <i>51</i>           | <i>1</i>                 | <i>3</i>                | 0        | 26       | 0                    |
| Germany                                          | <i>67</i>           | 0                        | 0                       | 0        | 0        | 0                    |
| Ghana                                            | 28                  | <i>10</i>                | 13                      | 2        | 0        | 0                    |
| Greece                                           | <i>67</i>           | 0                        | 1                       | 1        | 4        | 0                    |
| Greenland                                        | <i>67</i>           | 0                        | 0                       | 0        | 0        | 0                    |
| Grenada                                          | <i>44</i>           | 0                        | 0                       | 1        | 0        | 0                    |
| Guam                                             | <i>67</i>           | 0                        | 0                       | 1        | 0        | 0                    |
| Guatemala                                        | <i>58</i>           | 6                        | 5                       | 1        | 0        | 0                    |
| Guinea                                           | 2                   | <i>3</i>                 | 2                       | <i>2</i> | 0        | 1                    |
| Guinea-Bissau                                    | 21                  | <i>1</i>                 | 3                       | 0        | 0        | 0                    |
| Guyana                                           | 34                  | <i>5</i>                 | 7                       | 1        | 0        | 0                    |
| Haiti                                            | 0                   | <i>5</i>                 | 3                       | 2        | 0        | 0                    |
| Honduras                                         | 36                  | <i>4</i>                 | 7                       | 2        | 0        | 0                    |
| Hong Kong Special Administrative Region of China | <i>67</i>           | 0                        | 0                       | 1        | 0        | 0                    |
| Hungary                                          | <i>67</i>           | 0                        | 1                       | 4        | 13       | 0                    |
| Iceland                                          | <i>67</i>           | 0                        | 0                       | 1        | 0        | 0                    |
| India                                            | <i>65</i>           | 6                        | 9                       | 4        | 22       | <i>24</i>            |
| Indonesia                                        | <i>15</i>           | <i>8</i>                 | <i>10</i>               | <i>6</i> | <i>5</i> | 0                    |
| Iran                                             | <i>55</i>           | 0                        | <i>5</i>                | <i>4</i> | 0        | 0                    |
| Iraq                                             | 39                  | <i>4</i>                 | 6                       | 1        | 0        | 0                    |
| Ireland                                          | <i>67</i>           | 0                        | 0                       | 2        | 0        | 0                    |
| Israel                                           | <i>67</i>           | 0                        | 0                       | 1        | 0        | 0                    |
| Italy                                            | <i>67</i>           | 0                        | 0                       | 0        | 0        | 0                    |
| Jamaica                                          | <i>56</i>           | <i>1</i>                 | 4                       | 2        | 0        | 0                    |
| Japan                                            | <i>67</i>           | 0                        | 0                       | 1        | 0        | 0                    |
| Jordan                                           | 48                  | <i>6</i>                 | 6                       | 1        | 9        | 0                    |
| Kazakhstan                                       | <i>52</i>           | 2                        | 4                       | 2        | 0        | 0                    |
| Kenya                                            | <i>49</i>           | <i>8</i>                 | <i>11</i>               | <i>5</i> | <i>3</i> | 0                    |
| Kiribati                                         | <i>18</i>           | 0                        | <i>1</i>                | <i>3</i> | 0        | 0                    |
| Kuwait                                           | <i>57</i>           | 0                        | 1                       | 1        | 1        | 0                    |
| Kyrgyzstan                                       | <i>53</i>           | 3                        | 5                       | 1        | 0        | 0                    |
| Laos                                             | 0                   | 2                        | 4                       | 1        | 0        | 0                    |
| Latvia                                           | <i>67</i>           | 0                        | 1                       | 1        | 0        | 0                    |
| Lebanon                                          | 27                  | <i>1</i>                 | 4                       | 0        | 0        | 0                    |
| Lesotho                                          | 2                   | <i>3</i>                 | 6                       | 1        | 1        | 0                    |
| Liberia                                          | 5                   | <i>4</i>                 | 4                       | <i>4</i> | 2        | 0                    |
| Libya                                            | <i>46</i>           | 0                        | <i>2</i>                | <i>1</i> | 0        | 0                    |
| Lithuania                                        | <i>67</i>           | 0                        | 0                       | 1        | 0        | 0                    |
| Luxembourg                                       | <i>67</i>           | 0                        | 0                       | 2        | 0        | 0                    |
| Macao Special Administrative Region of China     | <i>56</i>           | 0                        | 1                       | 1        | 0        | 0                    |
| Macedonia                                        | <i>31</i>           | 0                        | 2                       | 1        | 1        | 0                    |
| Madagascar                                       | 24                  | <i>6</i>                 | 4                       | 0        | 0        | 0                    |
| Malawi                                           | 5                   | <i>7</i>                 | 9                       | 4        | 3        | 0                    |
| Malaysia                                         | <i>58</i>           | 0                        | 2                       | 1        | 0        | 0                    |
| Maldives                                         | <i>47</i>           | <i>1</i>                 | <i>3</i>                | 3        | 0        | 0                    |
| Mali                                             | 3                   | <i>6</i>                 | 3                       | 3        | 0        | 0                    |
| Malta                                            | <i>67</i>           | 0                        | 0                       | 0        | 0        | 0                    |
| Marshall Islands                                 | <i>26</i>           | 0                        | <i>1</i>                | 2        | 0        | 0                    |
| Mauritania                                       | 1                   | 2                        | 5                       | 1        | 0        | 0                    |
| Mauritius                                        | <i>67</i>           | 0                        | 0                       | 1        | 0        | 0                    |
| Mexico                                           | 66                  | 1                        | <i>11</i>               | 5        | 0        | 0                    |
| Moldova                                          | <i>52</i>           | 2                        | 4                       | 0        | 0        | 0                    |
| Mongolia                                         | <i>44</i>           | 2                        | 9                       | 0        | 0        | 0                    |
| Montenegro                                       | <i>26</i>           | 0                        | 1                       | 0        | 1        | 0                    |
| Morocco                                          | 18                  | <i>5</i>                 | 5                       | 3        | 0        | 0                    |
| Mozambique                                       | 28                  | <i>4</i>                 | 5                       | <i>3</i> | 0        | 0                    |

**Appendix Table 3. Number of unique sources used for the analysis of age-specific fertility for each location**

Reference sources are bolded and italicized

| Location                         | Vital Registrations | Complete Birth Histories | Summary Birth Histories | Censuses | Other     | Sample Registrations |
|----------------------------------|---------------------|--------------------------|-------------------------|----------|-----------|----------------------|
| Myanmar                          | 6                   | <b>2</b>                 | 3                       | 2        | 0         | 0                    |
| Namibia                          | 2                   | <b>4</b>                 | 1                       | <b>3</b> | 0         | 0                    |
| Nepal                            | 0                   | <b>8</b>                 | <b>6</b>                | 2        | 0         | 0                    |
| Netherlands                      | <b>67</b>           | 0                        | 0                       | 1        | 0         | 0                    |
| New Zealand                      | <b>67</b>           | 0                        | 0                       | 2        | 0         | 0                    |
| Nicaragua                        | 44                  | <b>5</b>                 | <b>6</b>                | <b>3</b> | 0         | 0                    |
| Niger                            | 0                   | <b>4</b>                 | 2                       | <b>1</b> | 0         | 0                    |
| Nigeria                          | 2                   | <b>8</b>                 | 11                      | 3        | 0         | 0                    |
| North Korea                      | <b>2</b>            | 0                        | 0                       | 0        | 0         | 0                    |
| Northern Mariana Islands         | <b>8</b>            | 0                        | 0                       | 0        | 0         | 0                    |
| Norway                           | <b>67</b>           | 0                        | 0                       | 1        | 0         | 0                    |
| Oman                             | <b>11</b>           | 0                        | 0                       | <b>1</b> | <b>8</b>  | 0                    |
| Pakistan                         | 16                  | <b>6</b>                 | 10                      | 1        | 19        | 1                    |
| Palestine                        | 20                  | <b>3</b>                 | 6                       | 0        | 0         | 0                    |
| Panama                           | <b>66</b>           | 1                        | 5                       | 5        | 0         | 0                    |
| Papua New Guinea                 | <b>4</b>            | 0                        | <b>2</b>                | <b>3</b> | 0         | 0                    |
| Paraguay                         | 42                  | <b>6</b>                 | 10                      | 4        | 0         | 0                    |
| Peru                             | 62                  | <b>14</b>                | 7                       | 2        | 0         | 0                    |
| Philippines                      | 66                  | <b>6</b>                 | 4                       | 3        | <b>11</b> | 0                    |
| Poland                           | <b>67</b>           | 0                        | 0                       | 1        | 6         | 0                    |
| Portugal                         | <b>67</b>           | 1                        | 1                       | 2        | 0         | 0                    |
| Puerto Rico                      | <b>58</b>           | 0                        | 1                       | 2        | 0         | 0                    |
| Qatar                            | <b>47</b>           | 0                        | 0                       | <b>1</b> | <b>1</b>  | 0                    |
| Romania                          | <b>67</b>           | 0                        | 3                       | 3        | 0         | 0                    |
| Russian Federation               | <b>66</b>           | 0                        | 1                       | 1        | 0         | 0                    |
| Rwanda                           | 19                  | <b>8</b>                 | <b>8</b>                | 4        | 0         | 0                    |
| Saint Lucia                      | <b>47</b>           | 0                        | 0                       | 2        | 0         | 0                    |
| Saint Vincent and the Grenadines | <b>54</b>           | 0                        | 0                       | 2        | 0         | 0                    |
| Samoa                            | 38                  | 0                        | 0                       | <b>1</b> | 0         | <b>3</b>             |
| Sao Tome and Principe            | <b>41</b>           | <b>1</b>                 | 5                       | <b>2</b> | 0         | 0                    |
| Saudi Arabia                     | 8                   | 0                        | <b>2</b>                | 0        | 0         | 0                    |
| Senegal                          | 3                   | <b>13</b>                | 4                       | <b>3</b> | 0         | 0                    |
| Serbia                           | <b>67</b>           | 0                        | 3                       | 0        | 1         | 0                    |
| Seychelles                       | <b>67</b>           | 0                        | 0                       | <b>3</b> | 0         | 0                    |
| Sierra Leone                     | 12                  | <b>3</b>                 | 5                       | 1        | 0         | 0                    |
| Singapore                        | <b>67</b>           | 0                        | 0                       | 2        | 0         | 0                    |
| Slovakia                         | <b>67</b>           | 0                        | 1                       | 1        | 0         | 0                    |
| Slovenia                         | <b>64</b>           | 0                        | 0                       | 1        | 1         | 0                    |
| Solomon Islands                  | 1                   | <b>1</b>                 | 0                       | 3        | 0         | 0                    |
| Somalia                          | 0                   | <b>1</b>                 | 3                       | 0        | 0         | 0                    |
| South Africa                     | 27                  | <b>4</b>                 | 5                       | 1        | 0         | 0                    |
| South Korea                      | <b>43</b>           | <b>1</b>                 | 2                       | 2        | 22        | 0                    |
| South Sudan                      | 0                   | 0                        | <b>2</b>                | <b>1</b> | 0         | 0                    |
| Spain                            | <b>67</b>           | 0                        | 0                       | 1        | 0         | 0                    |
| Sri Lanka                        | <b>66</b>           | 2                        | 3                       | 2        | 5         | 0                    |
| Sudan                            | 4                   | <b>5</b>                 | <b>5</b>                | 3        | 0         | 0                    |
| Suriname                         | <b>51</b>           | 0                        | <b>2</b>                | <b>1</b> | 0         | 0                    |
| Swaziland                        | 3                   | <b>3</b>                 | 3                       | <b>3</b> | 0         | 0                    |
| Sweden                           | <b>67</b>           | 0                        | 1                       | 0        | 0         | 0                    |
| Switzerland                      | <b>67</b>           | 0                        | 0                       | 2        | 0         | 0                    |
| Syria                            | <b>57</b>           | 2                        | 6                       | 2        | 0         | 0                    |
| Taiwan (Province of China)       | <b>66</b>           | 0                        | 0                       | 0        | 0         | 0                    |
| Tajikistan                       | 44                  | <b>2</b>                 | 6                       | 1        | 0         | 0                    |
| Tanzania                         | 1                   | <b>7</b>                 | 7                       | 2        | 0         | 0                    |
| Thailand                         | <b>67</b>           | 1                        | 8                       | 3        | 6         | 0                    |
| The Bahamas                      | <b>65</b>           | 0                        | 0                       | 2        | 0         | 0                    |
| The Gambia                       | 0                   | <b>1</b>                 | 5                       | 2        | 0         | 0                    |
| Timor-Leste                      | 19                  | <b>5</b>                 | <b>12</b>               | 0        | 0         | 0                    |
| Togo                             | 1                   | <b>4</b>                 | <b>3</b>                | 2        | 1         | 0                    |
| Tonga                            | <b>46</b>           | 0                        | 2                       | 2        | 0         | 0                    |

**Appendix Table 3. Number of unique sources used for the analysis of age-specific fertility for each location**

Reference sources are bolded and italicized

| Location             | Vital Registrations | Complete Birth Histories | Summary Birth Histories | Censues  | Other    | Sample Registrations |
|----------------------|---------------------|--------------------------|-------------------------|----------|----------|----------------------|
| Trinidad and Tobago  | <i>64</i>           | <i>2</i>                 | <i>6</i>                | 2        | 0        | 0                    |
| Tunisia              | <i>66</i>           | <i>4</i>                 | 7                       | 1        | 0        | 0                    |
| Turkey               | <i>25</i>           | <i>4</i>                 | <i>9</i>                | <i>2</i> | <i>4</i> | 0                    |
| Turkmenistan         | 35                  | <i>1</i>                 | 3                       | 0        | 0        | 0                    |
| Uganda               | 2                   | <i>8</i>                 | <i>10</i>               | <i>2</i> | 0        | <i>1</i>             |
| Ukraine              | <i>66</i>           | <i>1</i>                 | 3                       | 1        | 0        | 0                    |
| United Arab Emirates | <i>32</i>           | 0                        | <i>1</i>                | <i>1</i> | 0        | 0                    |
| United Kingdom       | <i>67</i>           | 0                        | 0                       | 0        | 0        | 0                    |
| Uruguay              | <i>57</i>           | 0                        | 3                       | 5        | 0        | 0                    |
| USA                  | <i>67</i>           | 0                        | 0                       | 1        | 0        | 0                    |
| Uzbekistan           | 46                  | <i>2</i>                 | <i>4</i>                | 0        | 0        | 0                    |
| Vanuatu              | 0                   | 0                        | <i>2</i>                | <i>4</i> | 0        | 0                    |
| Venezuela            | <i>65</i>           | <i>1</i>                 | 3                       | 3        | 0        | 0                    |
| Vietnam              | 5                   | <i>3</i>                 | <i>15</i>               | 3        | 4        | 0                    |
| Virgin Islands       | <i>46</i>           | 0                        | 0                       | 1        | 0        | 0                    |
| Yemen                | 4                   | <i>3</i>                 | <i>7</i>                | 1        | 0        | 0                    |
| Zambia               | 3                   | <i>5</i>                 | 0                       | 0        | 0        | 0                    |
| Zimbabwe             | 1                   | <i>8</i>                 | 2                       | 2        | 0        | 0                    |



**Appendix Table 4. Number of unique sources used for the analysis of age-specific fertility by year**

| Year | Vital Registrations | Complete Birth Histories | Summary Birth Histories | Censuses | Other | Sample Registrations |
|------|---------------------|--------------------------|-------------------------|----------|-------|----------------------|
| 1950 | 119                 | 0                        | 0                       | 0        | 1     | 0                    |
| 1951 | 119                 | 1                        | 0                       | 0        | 1     | 0                    |
| 1952 | 118                 | 0                        | 0                       | 0        | 0     | 0                    |
| 1953 | 119                 | 0                        | 0                       | 0        | 0     | 0                    |
| 1954 | 118                 | 0                        | 0                       | 1        | 0     | 0                    |
| 1955 | 122                 | 0                        | 0                       | 0        | 1     | 0                    |
| 1956 | 122                 | 0                        | 0                       | 0        | 0     | 0                    |
| 1957 | 122                 | 0                        | 0                       | 0        | 0     | 0                    |
| 1958 | 123                 | 1                        | 0                       | 0        | 2     | 0                    |
| 1959 | 124                 | 0                        | 0                       | 0        | 0     | 0                    |
| 1960 | 127                 | 0                        | 0                       | 11       | 3     | 0                    |
| 1961 | 125                 | 0                        | 0                       | 2        | 3     | 0                    |
| 1962 | 123                 | 0                        | 0                       | 0        | 3     | 0                    |
| 1963 | 126                 | 0                        | 0                       | 0        | 3     | 0                    |
| 1964 | 126                 | 0                        | 0                       | 1        | 4     | 0                    |
| 1965 | 122                 | 0                        | 0                       | 0        | 4     | 0                    |
| 1966 | 118                 | 0                        | 0                       | 2        | 4     | 0                    |
| 1967 | 115                 | 0                        | 0                       | 1        | 4     | 0                    |
| 1968 | 116                 | 0                        | 0                       | 0        | 3     | 0                    |
| 1969 | 117                 | 0                        | 0                       | 1        | 2     | 0                    |
| 1970 | 124                 | 0                        | 0                       | 9        | 7     | 0                    |
| 1971 | 121                 | 0                        | 3                       | 10       | 5     | 1                    |
| 1972 | 114                 | 1                        | 1                       | 1        | 8     | 0                    |
| 1973 | 111                 | 3                        | 1                       | 7        | 2     | 0                    |
| 1974 | 115                 | 8                        | 6                       | 4        | 4     | 0                    |
| 1975 | 114                 | 3                        | 5                       | 4        | 5     | 0                    |
| 1976 | 118                 | 8                        | 7                       | 6        | 6     | 1                    |
| 1977 | 113                 | 4                        | 6                       | 4        | 3     | 0                    |
| 1978 | 116                 | 5                        | 9                       | 2        | 3     | 0                    |
| 1979 | 124                 | 0                        | 5                       | 3        | 3     | 0                    |
| 1980 | 127                 | 0                        | 6                       | 30       | 6     | 0                    |
| 1981 | 125                 | 0                        | 8                       | 18       | 5     | 1                    |
| 1982 | 122                 | 1                        | 2                       | 7        | 5     | 0                    |
| 1983 | 121                 | 1                        | 3                       | 4        | 4     | 0                    |
| 1984 | 124                 | 4                        | 5                       | 4        | 6     | 0                    |
| 1985 | 127                 | 8                        | 5                       | 3        | 5     | 0                    |
| 1986 | 127                 | 8                        | 6                       | 5        | 7     | 1                    |
| 1987 | 127                 | 7                        | 11                      | 4        | 7     | 0                    |
| 1988 | 122                 | 5                        | 9                       | 6        | 5     | 0                    |
| 1989 | 123                 | 4                        | 9                       | 4        | 5     | 0                    |
| 1990 | 127                 | 11                       | 13                      | 11       | 6     | 0                    |
| 1991 | 124                 | 11                       | 20                      | 16       | 6     | 1                    |
| 1992 | 125                 | 9                        | 11                      | 9        | 3     | 0                    |
| 1993 | 119                 | 9                        | 15                      | 4        | 6     | 0                    |
| 1994 | 114                 | 10                       | 10                      | 5        | 4     | 0                    |
| 1995 | 109                 | 10                       | 12                      | 3        | 5     | 0                    |
| 1996 | 110                 | 16                       | 13                      | 7        | 8     | 1                    |
| 1997 | 96                  | 9                        | 13                      | 3        | 8     | 0                    |
| 1998 | 97                  | 10                       | 13                      | 3        | 4     | 1                    |
| 1999 | 100                 | 15                       | 20                      | 8        | 7     | 1                    |
| 2000 | 105                 | 6                        | 51                      | 21       | 6     | 1                    |
| 2001 | 98                  | 14                       | 21                      | 21       | 6     | 1                    |

**Appendix Table 4. Number of unique sources used for the analysis of age-specific fertility by year**

| Year | Vital Registrations | Complete Birth Histories | Summary Birth Histories | Censuses | Other | Sample Registrations |
|------|---------------------|--------------------------|-------------------------|----------|-------|----------------------|
| 2002 | 109                 | 12                       | 14                      | 10       | 6     | 1                    |
| 2003 | 110                 | 14                       | 15                      | 1        | 8     | 1                    |
| 2004 | 107                 | 20                       | 14                      | 2        | 5     | 1                    |
| 2005 | 105                 | 22                       | 25                      | 6        | 7     | 2                    |
| 2006 | 108                 | 15                       | 36                      | 3        | 7     | 1                    |
| 2007 | 112                 | 15                       | 19                      | 5        | 9     | 1                    |
| 2008 | 111                 | 13                       | 22                      | 8        | 5     | 1                    |
| 2009 | 108                 | 19                       | 23                      | 7        | 7     | 2                    |
| 2010 | 104                 | 22                       | 30                      | 10       | 5     | 1                    |
| 2011 | 105                 | 15                       | 28                      | 11       | 8     | 1                    |
| 2012 | 137                 | 21                       | 35                      | 4        | 7     | 1                    |
| 2013 | 132                 | 15                       | 21                      | 0        | 5     | 1                    |
| 2014 | 126                 | 17                       | 26                      | 1        | 4     | 2                    |
| 2015 | 109                 | 6                        | 10                      | 0        | 3     | 1                    |
| 2016 | 73                  | 1                        | 6                       | 1        | 0     | 4                    |
| 2017 | 1                   | 0                        | 0                       | 0        | 0     | 0                    |

**Appendix Table 5. List of all confirmed censuses by location and year**

| Location            | Year | Type     | Age detail         | Enumeration method | Included or excluded from estimation |
|---------------------|------|----------|--------------------|--------------------|--------------------------------------|
| Afghanistan         | 1979 | Census   | 5-year age groups  | De facto           | Included                             |
| Albania             | 1950 | Census   | 5-year age groups  | De facto           | Included                             |
| Albania             | 1955 | Census   | 5-year age groups  | De facto           | Included                             |
| Albania             | 1960 | Census   | 5-year age groups  | De facto           | Included                             |
| Albania             | 1969 | Census   | all ages only      | De facto           | Included                             |
| Albania             | 1979 | Census   | all ages only      | De jure            | Included                             |
| Albania             | 1989 | Census   | all ages only      | De jure            | Included                             |
| Albania             | 2001 | Census   | 5-year age groups  | De facto           | Included                             |
| Albania             | 2011 | Census   | 5-year age groups  | De jure            | Included                             |
| Algeria             | 1954 | Census   | non-std age groups | Unknown            | Included                             |
| Algeria             | 1960 | Census   | Not Available      | Unknown            | Excluded                             |
| Algeria             | 1966 | Census   | 5-year age groups  | De jure            | Included                             |
| Algeria             | 1977 | Census   | 5-year age groups  | De jure            | Included                             |
| Algeria             | 1987 | Census   | 5-year age groups  | De jure            | Included                             |
| Algeria             | 1998 | Census   | 5-year age groups  | De jure            | Included                             |
| Algeria             | 2008 | Census   | 1-year age groups  | De jure            | Included                             |
| American Samoa      | 1950 | Census   | 5-year age groups  | De jure            | Included                             |
| American Samoa      | 1956 | Census   | 1-year age groups  | De jure            | Included                             |
| American Samoa      | 1960 | Census   | 5-year age groups  | De jure            | Included                             |
| American Samoa      | 1970 | Census   | 5-year age groups  | De jure            | Included                             |
| American Samoa      | 1974 | Census   | 5-year age groups  | De jure            | Included                             |
| American Samoa      | 1980 | Census   | 1-year age groups  | De jure            | Included                             |
| American Samoa      | 1990 | Census   | 5-year age groups  | De jure            | Included                             |
| American Samoa      | 2000 | Census   | 5-year age groups  | De jure            | Included                             |
| American Samoa      | 2010 | Census   | 5-year age groups  | De jure            | Included                             |
| Andorra             | 1966 | Registry | non-std age groups | NA                 | Included                             |
| Andorra             | 1985 | Registry | 1-year age groups  | NA                 | Included                             |
| Andorra             | 1986 | Registry | 1-year age groups  | NA                 | Included                             |
| Andorra             | 1987 | Registry | 1-year age groups  | NA                 | Included                             |
| Andorra             | 1988 | Registry | 1-year age groups  | NA                 | Included                             |
| Andorra             | 1989 | Census   | Not Available      | Unknown            | Excluded                             |
| Andorra             | 1989 | Registry | 1-year age groups  | NA                 | Included                             |
| Andorra             | 1990 | Registry | 1-year age groups  | NA                 | Included                             |
| Andorra             | 1991 | Registry | 1-year age groups  | NA                 | Included                             |
| Andorra             | 1992 | Registry | 1-year age groups  | NA                 | Included                             |
| Andorra             | 1993 | Registry | 1-year age groups  | NA                 | Included                             |
| Andorra             | 1994 | Registry | 1-year age groups  | NA                 | Included                             |
| Andorra             | 1995 | Registry | 1-year age groups  | NA                 | Included                             |
| Andorra             | 1996 | Registry | 1-year age groups  | NA                 | Included                             |
| Andorra             | 1997 | Registry | 1-year age groups  | NA                 | Included                             |
| Andorra             | 1998 | Registry | 1-year age groups  | NA                 | Included                             |
| Andorra             | 1999 | Registry | 1-year age groups  | NA                 | Included                             |
| Andorra             | 2000 | Registry | 1-year age groups  | NA                 | Included                             |
| Andorra             | 2001 | Registry | 1-year age groups  | NA                 | Included                             |
| Andorra             | 2002 | Registry | 1-year age groups  | NA                 | Included                             |
| Andorra             | 2003 | Registry | 1-year age groups  | NA                 | Included                             |
| Andorra             | 2004 | Registry | 1-year age groups  | NA                 | Included                             |
| Andorra             | 2005 | Registry | 1-year age groups  | NA                 | Included                             |
| Andorra             | 2006 | Registry | 1-year age groups  | NA                 | Included                             |
| Andorra             | 2007 | Registry | 1-year age groups  | NA                 | Included                             |
| Andorra             | 2008 | Registry | 1-year age groups  | NA                 | Included                             |
| Andorra             | 2009 | Registry | 1-year age groups  | NA                 | Included                             |
| Andorra             | 2010 | Registry | 1-year age groups  | NA                 | Included                             |
| Andorra             | 2011 | Census   | Not Available      | Unknown            | Included                             |
| Andorra             | 2011 | Registry | 1-year age groups  | NA                 | Included                             |
| Andorra             | 2012 | Registry | 1-year age groups  | NA                 | Included                             |
| Andorra             | 2013 | Registry | 1-year age groups  | NA                 | Included                             |
| Andorra             | 2014 | Registry | 1-year age groups  | NA                 | Included                             |
| Andorra             | 2015 | Registry | 1-year age groups  | NA                 | Included                             |
| Andorra             | 2016 | Registry | 1-year age groups  | NA                 | Included                             |
| Andorra             | 2017 | Registry | 1-year age groups  | NA                 | Included                             |
| Angola              | 1950 | Census   | 5-year age groups  | De facto           | Included                             |
| Angola              | 1960 | Census   | 5-year age groups  | De jure            | Included                             |
| Angola              | 1970 | Census   | all ages only      | Unknown            | Included                             |
| Angola              | 2014 | Census   | 1-year age groups  | De facto           | Included                             |
| Antigua and Barbuda | 1960 | Census   | 1-year age groups  | De facto           | Included                             |
| Antigua and Barbuda | 1970 | Census   | 5-year age groups  | De jure            | Included                             |
| Antigua and Barbuda | 1991 | Census   | 1-year age groups  | De jure            | Included                             |
| Antigua and Barbuda | 2001 | Census   | 1-year age groups  | De facto           | Included                             |
| Antigua and Barbuda | 2011 | Census   | 5-year age groups  | De jure            | Included                             |
| Argentina           | 1960 | Census   | 1-year age groups  | De facto           | Included                             |
| Argentina           | 1970 | Census   | 1-year age groups  | De facto           | Included                             |
| Argentina           | 1980 | Census   | 1-year age groups  | De facto           | Included                             |
| Argentina           | 1991 | Census   | 1-year age groups  | De facto           | Included                             |
| Argentina           | 2001 | Census   | 1-year age groups  | De facto           | Included                             |

**Appendix Table 5. List of all confirmed censuses by location and year**

| Location   | Year | Type     | Age detail         | Enumeration method | Included or excluded from estimation |
|------------|------|----------|--------------------|--------------------|--------------------------------------|
| Argentina  | 2010 | Census   | 1-year age groups  | De facto           | Included                             |
| Armenia    | 1959 | Census   | non-std age groups | De facto           | Included                             |
| Armenia    | 1970 | Census   | non-std age groups | De facto           | Included                             |
| Armenia    | 1979 | Census   | 5-year age groups  | De facto           | Included                             |
| Armenia    | 1989 | Census   | 5-year age groups  | De jure            | Included                             |
| Armenia    | 2001 | Census   | 1-year age groups  | De jure            | Included                             |
| Armenia    | 2011 | Census   | 1-year age groups  | De jure            | Included                             |
| Australia  | 1954 | Census   | 5-year age groups  | De facto           | Included                             |
| Australia  | 1961 | Census   | 1-year age groups  | De facto           | Included                             |
| Australia  | 1966 | Census   | 5-year age groups  | De facto           | Included                             |
| Australia  | 1971 | Census   | 1-year age groups  | De facto           | Included                             |
| Australia  | 1976 | Census   | 5-year age groups  | De facto           | Included                             |
| Australia  | 1981 | Census   | 5-year age groups  | De facto           | Included                             |
| Australia  | 1986 | Census   | 1-year age groups  | De facto           | Included                             |
| Australia  | 1991 | Census   | 1-year age groups  | De facto           | Included                             |
| Australia  | 1996 | Census   | 1-year age groups  | De facto           | Included                             |
| Australia  | 2001 | Census   | 1-year age groups  | De jure            | Included                             |
| Australia  | 2006 | Census   | 1-year age groups  | De jure            | Included                             |
| Australia  | 2011 | Census   | 1-year age groups  | De jure            | Included                             |
| Australia  | 2016 | Census   | 1-year age groups  | De jure            | Included                             |
| Austria    | 1951 | Census   | 1-year age groups  | De jure            | Included                             |
| Austria    | 1961 | Census   | 1-year age groups  | De jure            | Included                             |
| Austria    | 1971 | Census   | 1-year age groups  | De jure            | Included                             |
| Austria    | 1981 | Census   | 1-year age groups  | De jure            | Included                             |
| Austria    | 1991 | Census   | 1-year age groups  | De jure            | Included                             |
| Austria    | 2001 | Census   | 1-year age groups  | De jure            | Included                             |
| Austria    | 2002 | Registry | 5-year age groups  | NA                 | Included                             |
| Austria    | 2003 | Registry | 5-year age groups  | NA                 | Included                             |
| Austria    | 2004 | Registry | 5-year age groups  | NA                 | Included                             |
| Austria    | 2005 | Registry | 5-year age groups  | NA                 | Included                             |
| Austria    | 2006 | Registry | 5-year age groups  | NA                 | Included                             |
| Austria    | 2007 | Registry | 5-year age groups  | NA                 | Included                             |
| Austria    | 2008 | Registry | 5-year age groups  | NA                 | Included                             |
| Austria    | 2009 | Registry | 5-year age groups  | NA                 | Included                             |
| Austria    | 2010 | Registry | 5-year age groups  | NA                 | Included                             |
| Austria    | 2011 | Census   | 1-year age groups  | De jure            | Included                             |
| Austria    | 2011 | Registry | 5-year age groups  | NA                 | Included                             |
| Austria    | 2012 | Registry | 5-year age groups  | NA                 | Included                             |
| Austria    | 2013 | Registry | 5-year age groups  | NA                 | Included                             |
| Austria    | 2014 | Registry | 5-year age groups  | NA                 | Included                             |
| Austria    | 2015 | Registry | 5-year age groups  | NA                 | Included                             |
| Austria    | 2016 | Registry | 5-year age groups  | NA                 | Included                             |
| Austria    | 2017 | Registry | 5-year age groups  | NA                 | Included                             |
| Azerbaijan | 1959 | Census   | non-std age groups | De facto           | Included                             |
| Azerbaijan | 1970 | Census   | non-std age groups | De facto           | Included                             |
| Azerbaijan | 1979 | Census   | 5-year age groups  | De facto           | Included                             |
| Azerbaijan | 1989 | Census   | 5-year age groups  | De jure            | Included                             |
| Azerbaijan | 1999 | Census   | 1-year age groups  | De jure            | Included                             |
| Azerbaijan | 2009 | Census   | 1-year age groups  | De jure            | Included                             |
| Bahrain    | 1950 | Census   | all ages only      | De facto           | Included                             |
| Bahrain    | 1959 | Census   | non-std age groups | De facto           | Included                             |
| Bahrain    | 1965 | Census   | non-std age groups | De facto           | Included                             |
| Bahrain    | 1971 | Census   | 1-year age groups  | De facto           | Included                             |
| Bahrain    | 1981 | Census   | 5-year age groups  | De facto           | Included                             |
| Bahrain    | 1991 | Census   | 1-year age groups  | De facto           | Included                             |
| Bahrain    | 2001 | Census   | non-std age groups | De jure            | Included                             |
| Bahrain    | 2010 | Census   | 1-year age groups  | De jure            | Included                             |
| Bangladesh | 1951 | Census   | non-std age groups | De jure            | Included                             |
| Bangladesh | 1961 | Census   | non-std age groups | De jure            | Included                             |
| Bangladesh | 1974 | Census   | 5-year age groups  | De facto           | Included                             |
| Bangladesh | 1981 | Census   | 5-year age groups  | De facto           | Included                             |
| Bangladesh | 1991 | Census   | non-std age groups | De facto           | Included                             |
| Bangladesh | 2001 | Census   | 1-year age groups  | De facto           | Included                             |
| Bangladesh | 2011 | Census   | 5-year age groups  | De facto           | Included                             |
| Barbados   | 1960 | Census   | 1-year age groups  | De facto           | Included                             |
| Barbados   | 1970 | Census   | 1-year age groups  | De facto           | Included                             |
| Barbados   | 1980 | Census   | 1-year age groups  | De facto           | Included                             |
| Barbados   | 1990 | Census   | 5-year age groups  | De jure            | Included                             |
| Barbados   | 2000 | Census   | 1-year age groups  | De facto           | Included                             |
| Barbados   | 2010 | Census   | 5-year age groups  | De jure            | Included                             |
| Belarus    | 1959 | Census   | non-std age groups | De facto           | Included                             |
| Belarus    | 1970 | Census   | non-std age groups | De facto           | Included                             |
| Belarus    | 1979 | Census   | 5-year age groups  | De facto           | Included                             |
| Belarus    | 1989 | Census   | 1-year age groups  | De jure            | Included                             |
| Belarus    | 1999 | Census   | 1-year age groups  | De jure            | Included                             |

**Appendix Table 5. List of all confirmed censuses by location and year**

| Location               | Year | Type     | Age detail         | Enumeration method | Included or excluded from estimation |
|------------------------|------|----------|--------------------|--------------------|--------------------------------------|
| Belarus                | 2009 | Census   | 1-year age groups  | De jure            | Included                             |
| Belgium                | 1961 | Census   | 1-year age groups  | De jure            | Included                             |
| Belgium                | 1970 | Census   | 1-year age groups  | De jure            | Included                             |
| Belgium                | 1981 | Census   | 1-year age groups  | De jure            | Included                             |
| Belgium                | 1991 | Census   | 5-year age groups  | De jure            | Included                             |
| Belgium                | 2001 | Census   | 1-year age groups  | De jure            | Included                             |
| Belgium                | 2010 | Registry | 1-year age groups  | NA                 | Included                             |
| Belgium                | 2011 | Census   | 1-year age groups  | De jure            | Included                             |
| Belgium                | 2011 | Registry | 1-year age groups  | NA                 | Included                             |
| Belgium                | 2012 | Registry | 1-year age groups  | NA                 | Included                             |
| Belgium                | 2013 | Registry | 1-year age groups  | NA                 | Included                             |
| Belgium                | 2014 | Registry | 1-year age groups  | NA                 | Included                             |
| Belgium                | 2015 | Registry | 1-year age groups  | NA                 | Included                             |
| Belgium                | 2016 | Registry | 1-year age groups  | NA                 | Included                             |
| Belgium                | 2017 | Registry | 1-year age groups  | NA                 | Included                             |
| Belize                 | 1960 | Census   | 5-year age groups  | De facto           | Included                             |
| Belize                 | 1970 | Census   | 1-year age groups  | De facto           | Included                             |
| Belize                 | 1980 | Census   | 1-year age groups  | De facto           | Included                             |
| Belize                 | 1991 | Census   | 1-year age groups  | De facto           | Included                             |
| Belize                 | 2000 | Census   | non-std age groups | De jure            | Included                             |
| Belize                 | 2010 | Census   | 5-year age groups  | De jure            | Included                             |
| Benin                  | 1951 | Census   | Not Available      | Unknown            | Excluded                             |
| Benin                  | 1979 | Census   | 5-year age groups  | De facto           | Included                             |
| Benin                  | 1992 | Census   | 1-year age groups  | De facto           | Included                             |
| Benin                  | 2002 | Census   | 1-year age groups  | De jure            | Included                             |
| Benin                  | 2013 | Census   | 5-year age groups  | De jure            | Included                             |
| Bermuda                | 1950 | Census   | 1-year age groups  | De jure            | Included                             |
| Bermuda                | 1960 | Census   | 1-year age groups  | De jure            | Included                             |
| Bermuda                | 1970 | Census   | 1-year age groups  | De jure            | Included                             |
| Bermuda                | 1980 | Census   | 1-year age groups  | De jure            | Included                             |
| Bermuda                | 1991 | Census   | 1-year age groups  | De jure            | Included                             |
| Bermuda                | 2000 | Census   | 1-year age groups  | De jure            | Included                             |
| Bermuda                | 2010 | Census   | 1-year age groups  | De jure            | Included                             |
| Bhutan                 | 1969 | Census   | Not Available      | Unknown            | Excluded                             |
| Bhutan                 | 1980 | Census   | Not Available      | Unknown            | Excluded                             |
| Bhutan                 | 2005 | Census   | 1-year age groups  | De facto           | Included                             |
| Bhutan                 | 2017 | Census   | Not Available      | Unknown            | Excluded                             |
| Bolivia                | 1950 | Census   | 1-year age groups  | De facto           | Included                             |
| Bolivia                | 1976 | Census   | 5-year age groups  | De facto           | Included                             |
| Bolivia                | 1992 | Census   | 1-year age groups  | De facto           | Included                             |
| Bolivia                | 2001 | Census   | 1-year age groups  | De facto           | Included                             |
| Bolivia                | 2012 | Census   | 1-year age groups  | De facto           | Included                             |
| Bosnia and Herzegovina | 1971 | Census   | 1-year age groups  | De facto           | Included                             |
| Bosnia and Herzegovina | 1981 | Census   | 5-year age groups  | De jure            | Included                             |
| Bosnia and Herzegovina | 1991 | Census   | 1-year age groups  | De jure            | Included                             |
| Bosnia and Herzegovina | 2013 | Census   | 1-year age groups  | De jure            | Included                             |
| Botswana               | 1964 | Census   | 1-year age groups  | De facto           | Included                             |
| Botswana               | 1971 | Census   | 1-year age groups  | De facto           | Excluded                             |
| Botswana               | 1981 | Census   | 1-year age groups  | De facto           | Included                             |
| Botswana               | 1991 | Census   | 1-year age groups  | De facto           | Included                             |
| Botswana               | 2001 | Census   | 5-year age groups  | De facto           | Included                             |
| Botswana               | 2011 | Census   | 1-year age groups  | De facto           | Included                             |
| Brazil                 | 1950 | Census   | 1-year age groups  | De facto           | Included                             |
| Brazil                 | 1960 | Census   | 1-year age groups  | De facto           | Included                             |
| Brazil                 | 1970 | Census   | 1-year age groups  | De facto           | Included                             |
| Brazil                 | 1980 | Census   | 1-year age groups  | De jure            | Included                             |
| Brazil                 | 1991 | Census   | 1-year age groups  | De jure            | Included                             |
| Brazil                 | 2000 | Census   | 1-year age groups  | De jure            | Included                             |
| Brazil                 | 2010 | Census   | 1-year age groups  | De jure            | Included                             |
| Brunei                 | 1960 | Census   | 5-year age groups  | De facto           | Included                             |
| Brunei                 | 1971 | Census   | 1-year age groups  | De facto           | Included                             |
| Brunei                 | 1981 | Census   | 1-year age groups  | De facto           | Included                             |
| Brunei                 | 1991 | Census   | 1-year age groups  | De facto           | Included                             |
| Brunei                 | 2001 | Census   | 5-year age groups  | De facto           | Included                             |
| Brunei                 | 2011 | Census   | 1-year age groups  | De jure            | Included                             |
| Bulgaria               | 1956 | Census   | 5-year age groups  | De facto           | Included                             |
| Bulgaria               | 1965 | Census   | 5-year age groups  | De facto           | Included                             |
| Bulgaria               | 1975 | Census   | 5-year age groups  | De facto           | Included                             |
| Bulgaria               | 1985 | Census   | 5-year age groups  | De jure            | Included                             |
| Bulgaria               | 1992 | Census   | 5-year age groups  | De jure            | Included                             |
| Bulgaria               | 2001 | Census   | 5-year age groups  | De jure            | Included                             |
| Bulgaria               | 2001 | Registry | 5-year age groups  | NA                 | Included                             |
| Bulgaria               | 2002 | Registry | 5-year age groups  | NA                 | Included                             |
| Bulgaria               | 2003 | Registry | 5-year age groups  | NA                 | Included                             |
| Bulgaria               | 2004 | Registry | 5-year age groups  | NA                 | Included                             |

**Appendix Table 5. List of all confirmed censuses by location and year**

| Location                            | Year | Type     | Age detail         | Enumeration method | Included or excluded from estimation |
|-------------------------------------|------|----------|--------------------|--------------------|--------------------------------------|
| Bulgaria                            | 2005 | Registry | 5-year age groups  | NA                 | Included                             |
| Bulgaria                            | 2006 | Registry | 5-year age groups  | NA                 | Included                             |
| Bulgaria                            | 2007 | Registry | 5-year age groups  | NA                 | Included                             |
| Bulgaria                            | 2008 | Registry | 5-year age groups  | NA                 | Included                             |
| Bulgaria                            | 2009 | Registry | 5-year age groups  | NA                 | Included                             |
| Bulgaria                            | 2010 | Registry | 5-year age groups  | NA                 | Included                             |
| Bulgaria                            | 2011 | Census   | 1-year age groups  | De jure            | Included                             |
| Bulgaria                            | 2011 | Registry | 5-year age groups  | NA                 | Included                             |
| Bulgaria                            | 2012 | Registry | 5-year age groups  | NA                 | Included                             |
| Bulgaria                            | 2013 | Registry | 5-year age groups  | NA                 | Included                             |
| Bulgaria                            | 2014 | Registry | 5-year age groups  | NA                 | Included                             |
| Bulgaria                            | 2015 | Registry | 5-year age groups  | NA                 | Included                             |
| Bulgaria                            | 2016 | Registry | 5-year age groups  | NA                 | Included                             |
| Burkina Faso                        | 1951 | Census   | Not Available      | Unknown            | Excluded                             |
| Burkina Faso                        | 1976 | Census   | non-std age groups | Unknown            | Included                             |
| Burkina Faso                        | 1985 | Census   | 1-year age groups  | De jure            | Included                             |
| Burkina Faso                        | 1996 | Census   | 1-year age groups  | De jure            | Included                             |
| Burkina Faso                        | 2006 | Census   | 1-year age groups  | De jure            | Included                             |
| Burkina Faso                        | 2016 | Census   | Not Available      | Unknown            | Excluded                             |
| Burundi                             | 1952 | Census   | Not Available      | Unknown            | Excluded                             |
| Burundi                             | 1958 | Census   | Not Available      | Unknown            | Excluded                             |
| Burundi                             | 1979 | Census   | 5-year age groups  | De jure            | Included                             |
| Burundi                             | 1990 | Census   | 1-year age groups  | De jure            | Included                             |
| Burundi                             | 2008 | Census   | 1-year age groups  | De jure            | Included                             |
| Cambodia                            | 1962 | Census   | 1-year age groups  | De facto           | Included                             |
| Cambodia                            | 1998 | Census   | 1-year age groups  | De facto           | Included                             |
| Cambodia                            | 2008 | Census   | 1-year age groups  | De facto           | Included                             |
| Cameroon                            | 1951 | Census   | Not Available      | Unknown            | Excluded                             |
| Cameroon                            | 1957 | Census   | Not Available      | Unknown            | Excluded                             |
| Cameroon                            | 1976 | Census   | 5-year age groups  | De jure            | Included                             |
| Cameroon                            | 1987 | Census   | 1-year age groups  | Unknown            | Included                             |
| Cameroon                            | 2005 | Census   | 1-year age groups  | De jure            | Included                             |
| Canada                              | 1951 | Census   | 5-year age groups  | De jure            | Included                             |
| Canada                              | 1956 | Census   | 1-year age groups  | De jure            | Included                             |
| Canada                              | 1961 | Census   | 5-year age groups  | De jure            | Included                             |
| Canada                              | 1966 | Census   | 5-year age groups  | De jure            | Included                             |
| Canada                              | 1971 | Census   | 5-year age groups  | De jure            | Included                             |
| Canada                              | 1976 | Census   | 5-year age groups  | De jure            | Included                             |
| Canada                              | 1981 | Census   | 1-year age groups  | De jure            | Included                             |
| Canada                              | 1986 | Census   | 5-year age groups  | De jure            | Included                             |
| Canada                              | 1991 | Census   | 1-year age groups  | De jure            | Included                             |
| Canada                              | 1996 | Census   | 1-year age groups  | De jure            | Included                             |
| Canada                              | 2001 | Census   | 1-year age groups  | De jure            | Included                             |
| Canada                              | 2006 | Census   | 1-year age groups  | De jure            | Included                             |
| Canada                              | 2011 | Census   | 1-year age groups  | De jure            | Included                             |
| Canada                              | 2016 | Census   | 1-year age groups  | De jure            | Included                             |
| Cape Verde                          | 1950 | Census   | non-std age groups | De facto           | Included                             |
| Cape Verde                          | 1960 | Census   | non-std age groups | De facto           | Included                             |
| Cape Verde                          | 1970 | Census   | 5-year age groups  | De facto           | Included                             |
| Cape Verde                          | 1980 | Census   | 5-year age groups  | De jure            | Included                             |
| Cape Verde                          | 1990 | Census   | 1-year age groups  | De facto           | Included                             |
| Cape Verde                          | 2000 | Census   | 5-year age groups  | De facto           | Included                             |
| Cape Verde                          | 2010 | Census   | 1-year age groups  | De jure            | Included                             |
| Central African Republic            | 1951 | Census   | Not Available      | Unknown            | Excluded                             |
| Central African Republic            | 1956 | Census   | Not Available      | Unknown            | Excluded                             |
| Central African Republic            | 1975 | Census   | 5-year age groups  | De facto           | Included                             |
| Central African Republic            | 1988 | Census   | 1-year age groups  | De facto           | Included                             |
| Central African Republic            | 2003 | Census   | 5-year age groups  | De facto           | Included                             |
| Chad                                | 1951 | Census   | Not Available      | Unknown            | Excluded                             |
| Chad                                | 1993 | Census   | 5-year age groups  | De jure            | Included                             |
| Chad                                | 2009 | Census   | 5-year age groups  | De jure            | Included                             |
| Chile                               | 1952 | Census   | 5-year age groups  | De facto           | Included                             |
| Chile                               | 1960 | Census   | 5-year age groups  | De facto           | Included                             |
| Chile                               | 1970 | Census   | 1-year age groups  | De facto           | Included                             |
| Chile                               | 1982 | Census   | 1-year age groups  | De facto           | Included                             |
| Chile                               | 1992 | Census   | 1-year age groups  | De facto           | Included                             |
| Chile                               | 2002 | Census   | 5-year age groups  | De facto           | Included                             |
| Chile                               | 2012 | Census   | 1-year age groups  | De jure            | Excluded                             |
| Chile                               | 2017 | Census   | 5-year age groups  | De facto           | Included                             |
| China (without Hong Kong and Macao) | 1953 | Census   | 1-year age groups  | De jure            | Included                             |
| China (without Hong Kong and Macao) | 1964 | Census   | 1-year age groups  | De jure            | Included                             |
| China (without Hong Kong and Macao) | 1982 | Census   | 1-year age groups  | De facto           | Included                             |
| China (without Hong Kong and Macao) | 1990 | Census   | 1-year age groups  | De jure            | Included                             |
| China (without Hong Kong and Macao) | 2000 | Census   | 1-year age groups  | De jure            | Included                             |
| China (without Hong Kong and Macao) | 2010 | Census   | 1-year age groups  | De jure            | Included                             |



**Appendix Table 5. List of all confirmed censuses by location and year**

| Location                            | Year | Type     | Age detail         | Enumeration method | Included or excluded from estimation |
|-------------------------------------|------|----------|--------------------|--------------------|--------------------------------------|
| Colombia                            | 1951 | Census   | 5-year age groups  | De facto           | Included                             |
| Colombia                            | 1964 | Census   | 1-year age groups  | De facto           | Included                             |
| Colombia                            | 1973 | Census   | 1-year age groups  | De facto           | Included                             |
| Colombia                            | 1985 | Census   | 1-year age groups  | De facto           | Included                             |
| Colombia                            | 1993 | Census   | 1-year age groups  | De facto           | Included                             |
| Colombia                            | 2005 | Census   | 1-year age groups  | De facto           | Included                             |
| Comoros                             | 1958 | Census   | 5-year age groups  | De facto           | Excluded                             |
| Comoros                             | 1966 | Census   | non-std age groups | De jure            | Included                             |
| Comoros                             | 1980 | Census   | 1-year age groups  | De facto           | Included                             |
| Comoros                             | 1991 | Census   | 5-year age groups  | De jure            | Included                             |
| Comoros                             | 2003 | Census   | non-std age groups | De jure            | Included                             |
| Comoros                             | 2016 | Census   | Not Available      | Unknown            | Excluded                             |
| Congo                               | 1951 | Census   | Not Available      | Unknown            | Excluded                             |
| Congo                               | 1954 | Census   | Not Available      | Unknown            | Excluded                             |
| Congo                               | 1956 | Census   | Not Available      | Unknown            | Excluded                             |
| Congo                               | 1967 | Census   | Not Available      | Unknown            | Excluded                             |
| Congo                               | 1974 | Census   | 5-year age groups  | De jure            | Included                             |
| Congo                               | 1984 | Census   | 1-year age groups  | De jure            | Included                             |
| Congo                               | 1996 | Census   | Not Available      | Unknown            | Excluded                             |
| Congo                               | 2007 | Census   | 1-year age groups  | De facto           | Included                             |
| Congo                               | 2017 | Census   | Not Available      | Unknown            | Excluded                             |
| Costa Rica                          | 1950 | Census   | 1-year age groups  | De jure            | Included                             |
| Costa Rica                          | 1963 | Census   | 1-year age groups  | De jure            | Included                             |
| Costa Rica                          | 1973 | Census   | 1-year age groups  | De jure            | Included                             |
| Costa Rica                          | 1984 | Census   | 1-year age groups  | De jure            | Included                             |
| Costa Rica                          | 2000 | Census   | 5-year age groups  | De jure            | Included                             |
| Costa Rica                          | 2011 | Census   | 1-year age groups  | De jure            | Included                             |
| Cote d'Ivoire                       | 1975 | Census   | 5-year age groups  | De facto           | Included                             |
| Cote d'Ivoire                       | 1988 | Census   | 1-year age groups  | De facto           | Included                             |
| Cote d'Ivoire                       | 1998 | Census   | 5-year age groups  | De jure            | Included                             |
| Cote d'Ivoire                       | 2014 | Census   | 1-year age groups  | De jure            | Included                             |
| Croatia                             | 1971 | Census   | 1-year age groups  | De facto           | Included                             |
| Croatia                             | 1991 | Census   | 1-year age groups  | De facto           | Included                             |
| Croatia                             | 2001 | Census   | 1-year age groups  | De jure            | Included                             |
| Croatia                             | 2011 | Census   | 1-year age groups  | De jure            | Included                             |
| Cuba                                | 1953 | Census   | 5-year age groups  | De jure            | Included                             |
| Cuba                                | 1970 | Census   | 5-year age groups  | De jure            | Included                             |
| Cuba                                | 1981 | Census   | 1-year age groups  | De jure            | Included                             |
| Cuba                                | 2002 | Census   | 1-year age groups  | De jure            | Included                             |
| Cuba                                | 2012 | Census   | 1-year age groups  | De jure            | Included                             |
| Cyprus                              | 1960 | Census   | non-std age groups | De jure            | Included                             |
| Cyprus (Republic of)                | 1976 | Census   | 5-year age groups  | De jure            | Included                             |
| Cyprus (Republic of)                | 1982 | Census   | 5-year age groups  | De jure            | Included                             |
| Cyprus (Republic of)                | 1992 | Census   | 1-year age groups  | De jure            | Included                             |
| Cyprus (Republic of)                | 2001 | Census   | 1-year age groups  | De jure            | Included                             |
| Cyprus (Republic of)                | 2011 | Census   | 1-year age groups  | De jure            | Included                             |
| Cyprus (Turkish Federated State of) | 1978 | Census   | 5-year age groups  | De jure            | Included                             |
| Cyprus (Turkish Federated State of) | 1996 | Census   | 5-year age groups  | De jure            | Included                             |
| Cyprus (Turkish Federated State of) | 2006 | Census   | 5-year age groups  | De jure            | Included                             |
| Cyprus (Turkish Federated State of) | 2011 | Census   | 5-year age groups  | De jure            | Included                             |
| Czech Republic                      | 1961 | Census   | 1-year age groups  | De facto           | Included                             |
| Czech Republic                      | 1970 | Census   | 1-year age groups  | De jure            | Included                             |
| Czech Republic                      | 1980 | Census   | 1-year age groups  | De jure            | Included                             |
| Czech Republic                      | 1991 | Census   | 1-year age groups  | De jure            | Included                             |
| Czech Republic                      | 2000 | Registry | 1-year age groups  | NA                 | Included                             |
| Czech Republic                      | 2001 | Census   | 1-year age groups  | De jure            | Included                             |
| Czech Republic                      | 2001 | Registry | 1-year age groups  | NA                 | Included                             |
| Czech Republic                      | 2002 | Registry | 1-year age groups  | NA                 | Included                             |
| Czech Republic                      | 2003 | Registry | 1-year age groups  | NA                 | Included                             |
| Czech Republic                      | 2004 | Registry | 1-year age groups  | NA                 | Included                             |
| Czech Republic                      | 2005 | Registry | 1-year age groups  | NA                 | Included                             |
| Czech Republic                      | 2006 | Registry | 1-year age groups  | NA                 | Included                             |
| Czech Republic                      | 2007 | Registry | 1-year age groups  | NA                 | Included                             |
| Czech Republic                      | 2008 | Registry | 1-year age groups  | NA                 | Included                             |
| Czech Republic                      | 2009 | Registry | 1-year age groups  | NA                 | Included                             |
| Czech Republic                      | 2010 | Registry | 1-year age groups  | NA                 | Included                             |
| Czech Republic                      | 2011 | Census   | 1-year age groups  | De jure            | Included                             |
| Czech Republic                      | 2011 | Registry | 1-year age groups  | NA                 | Included                             |
| Czech Republic                      | 2012 | Registry | 1-year age groups  | NA                 | Included                             |
| Czech Republic                      | 2013 | Registry | 1-year age groups  | NA                 | Included                             |
| Czech Republic                      | 2014 | Registry | 1-year age groups  | NA                 | Included                             |
| Czech Republic                      | 2015 | Registry | 1-year age groups  | NA                 | Included                             |
| Czech Republic                      | 2016 | Registry | 1-year age groups  | NA                 | Included                             |
| Czech Republic                      | 2017 | Registry | 1-year age groups  | NA                 | Included                             |
| Democratic Republic of the Congo    | 1952 | Census   | Not Available      | Unknown            | Excluded                             |

**Appendix Table 5. List of all confirmed censuses by location and year**

| Location                         | Year | Type     | Age detail        | Enumeration method | Included or excluded from estimation |
|----------------------------------|------|----------|-------------------|--------------------|--------------------------------------|
| Democratic Republic of the Congo | 1955 | Census   | Not Available     | Unknown            | Excluded                             |
| Democratic Republic of the Congo | 1958 | Census   | Not Available     | Unknown            | Excluded                             |
| Democratic Republic of the Congo | 1970 | Census   | all ages only     | De jure            | Included                             |
| Democratic Republic of the Congo | 1984 | Census   | 1-year age groups | Unknown            | Included                             |
| Denmark                          | 1950 | Census   | 1-year age groups | De jure            | Included                             |
| Denmark                          | 1960 | Census   | 1-year age groups | De jure            | Included                             |
| Denmark                          | 1965 | Census   | 5-year age groups | De jure            | Included                             |
| Denmark                          | 1970 | Census   | 1-year age groups | De jure            | Included                             |
| Denmark                          | 1976 | Census   | 1-year age groups | De jure            | Included                             |
| Denmark                          | 1980 | Registry | 1-year age groups | NA                 | Included                             |
| Denmark                          | 1981 | Census   | Not Available     | Unknown            | Excluded                             |
| Denmark                          | 1981 | Registry | 1-year age groups | NA                 | Included                             |
| Denmark                          | 1982 | Registry | 1-year age groups | NA                 | Included                             |
| Denmark                          | 1983 | Registry | 1-year age groups | NA                 | Included                             |
| Denmark                          | 1984 | Registry | 1-year age groups | NA                 | Included                             |
| Denmark                          | 1985 | Registry | 1-year age groups | NA                 | Included                             |
| Denmark                          | 1986 | Registry | 1-year age groups | NA                 | Included                             |
| Denmark                          | 1987 | Registry | 1-year age groups | NA                 | Included                             |
| Denmark                          | 1988 | Registry | 1-year age groups | NA                 | Included                             |
| Denmark                          | 1989 | Registry | 1-year age groups | NA                 | Included                             |
| Denmark                          | 1990 | Registry | 1-year age groups | NA                 | Included                             |
| Denmark                          | 1991 | Census   | 1-year age groups | De jure            | Included                             |
| Denmark                          | 1991 | Registry | 1-year age groups | NA                 | Included                             |
| Denmark                          | 1992 | Registry | 1-year age groups | NA                 | Included                             |
| Denmark                          | 1993 | Registry | 1-year age groups | NA                 | Included                             |
| Denmark                          | 1994 | Registry | 1-year age groups | NA                 | Included                             |
| Denmark                          | 1995 | Registry | 1-year age groups | NA                 | Included                             |
| Denmark                          | 1996 | Registry | 1-year age groups | NA                 | Included                             |
| Denmark                          | 1997 | Registry | 1-year age groups | NA                 | Included                             |
| Denmark                          | 1998 | Registry | 1-year age groups | NA                 | Included                             |
| Denmark                          | 1999 | Registry | 1-year age groups | NA                 | Included                             |
| Denmark                          | 2000 | Registry | 1-year age groups | NA                 | Included                             |
| Denmark                          | 2001 | Census   | Not Available     | Unknown            | Excluded                             |
| Denmark                          | 2001 | Registry | 1-year age groups | NA                 | Included                             |
| Denmark                          | 2002 | Registry | 1-year age groups | NA                 | Included                             |
| Denmark                          | 2003 | Registry | 1-year age groups | NA                 | Included                             |
| Denmark                          | 2004 | Registry | 1-year age groups | NA                 | Included                             |
| Denmark                          | 2005 | Registry | 1-year age groups | NA                 | Included                             |
| Denmark                          | 2006 | Registry | 1-year age groups | NA                 | Included                             |
| Denmark                          | 2007 | Registry | 1-year age groups | NA                 | Included                             |
| Denmark                          | 2008 | Registry | 1-year age groups | NA                 | Included                             |
| Denmark                          | 2009 | Registry | 1-year age groups | NA                 | Included                             |
| Denmark                          | 2010 | Registry | 1-year age groups | NA                 | Included                             |
| Denmark                          | 2011 | Census   | Not Available     | Unknown            | Excluded                             |
| Denmark                          | 2011 | Registry | 1-year age groups | NA                 | Included                             |
| Denmark                          | 2012 | Registry | 1-year age groups | NA                 | Included                             |
| Denmark                          | 2013 | Registry | 1-year age groups | NA                 | Included                             |
| Denmark                          | 2014 | Registry | 1-year age groups | NA                 | Included                             |
| Denmark                          | 2015 | Registry | 1-year age groups | NA                 | Included                             |
| Denmark                          | 2016 | Registry | 1-year age groups | NA                 | Included                             |
| Denmark                          | 2017 | Registry | 1-year age groups | NA                 | Included                             |
| Djibouti                         | 1951 | Census   | Not Available     | Unknown            | Excluded                             |
| Djibouti                         | 1956 | Census   | Not Available     | Unknown            | Excluded                             |
| Djibouti                         | 1960 | Census   | Not Available     | Unknown            | Excluded                             |
| Djibouti                         | 1983 | Census   | 5-year age groups | De jure            | Included                             |
| Djibouti                         | 2009 | Census   | 5-year age groups | De jure            | Included                             |
| Dominica                         | 1960 | Census   | 5-year age groups | De facto           | Included                             |
| Dominica                         | 1970 | Census   | 5-year age groups | De facto           | Included                             |
| Dominica                         | 1981 | Census   | 1-year age groups | De jure            | Included                             |
| Dominica                         | 1991 | Census   | 5-year age groups | De facto           | Included                             |
| Dominica                         | 2001 | Census   | 5-year age groups | De facto           | Included                             |
| Dominica                         | 2011 | Census   | 5-year age groups | De facto           | Included                             |
| Dominican Republic               | 1950 | Census   | 1-year age groups | De jure            | Included                             |
| Dominican Republic               | 1960 | Census   | 1-year age groups | De jure            | Included                             |
| Dominican Republic               | 1970 | Census   | 1-year age groups | De jure            | Included                             |
| Dominican Republic               | 1981 | Census   | 5-year age groups | De jure            | Included                             |
| Dominican Republic               | 1993 | Census   | 1-year age groups | De jure            | Included                             |
| Dominican Republic               | 2002 | Census   | 1-year age groups | De jure            | Included                             |
| Dominican Republic               | 2010 | Census   | 1-year age groups | De jure            | Included                             |
| Ecuador                          | 1950 | Census   | 1-year age groups | De facto           | Included                             |
| Ecuador                          | 1962 | Census   | 1-year age groups | De facto           | Included                             |
| Ecuador                          | 1974 | Census   | 5-year age groups | De facto           | Included                             |
| Ecuador                          | 1982 | Census   | 1-year age groups | De facto           | Included                             |
| Ecuador                          | 1990 | Census   | 1-year age groups | De facto           | Included                             |
| Ecuador                          | 2001 | Census   | 1-year age groups | De facto           | Included                             |



**Appendix Table 5. List of all confirmed censuses by location and year**

| Location          | Year | Type     | Age detail         | Enumeration method | Included or excluded from estimation |
|-------------------|------|----------|--------------------|--------------------|--------------------------------------|
| Ecuador           | 2010 | Census   | 1-year age groups  | De facto           | Included                             |
| Egypt             | 1960 | Census   | 5-year age groups  | De facto           | Included                             |
| Egypt             | 1966 | Census   | all ages only      | De facto           | Included                             |
| Egypt             | 1976 | Census   | 5-year age groups  | De facto           | Included                             |
| Egypt             | 1986 | Census   | 5-year age groups  | De facto           | Included                             |
| Egypt             | 1996 | Census   | 5-year age groups  | De facto           | Included                             |
| Egypt             | 2006 | Census   | 1-year age groups  | De facto           | Included                             |
| Egypt             | 2017 | Census   | 5-year age groups  | De facto           | Included                             |
| El Salvador       | 1950 | Census   | 1-year age groups  | De facto           | Included                             |
| El Salvador       | 1961 | Census   | 1-year age groups  | De facto           | Included                             |
| El Salvador       | 1971 | Census   | 1-year age groups  | De facto           | Included                             |
| El Salvador       | 1992 | Census   | 1-year age groups  | De facto           | Included                             |
| El Salvador       | 2007 | Census   | 1-year age groups  | De jure            | Included                             |
| England           | 1951 | Census   | 5-year age groups  | De facto           | Included                             |
| England           | 1961 | Census   | 5-year age groups  | Unknown            | Included                             |
| England           | 1971 | Census   | 5-year age groups  | Unknown            | Included                             |
| England           | 1981 | Census   | 5-year age groups  | Unknown            | Included                             |
| England           | 1991 | Census   | non-std age groups | De jure            | Included                             |
| England           | 2001 | Census   | 5-year age groups  | De jure            | Included                             |
| England           | 2011 | Census   | 1-year age groups  | De jure            | Included                             |
| Equatorial Guinea | 1950 | Census   | Not Available      | Unknown            | Excluded                             |
| Equatorial Guinea | 1960 | Census   | Not Available      | Unknown            | Excluded                             |
| Equatorial Guinea | 1983 | Census   | 5-year age groups  | De facto           | Included                             |
| Equatorial Guinea | 1994 | Census   | Not Available      | Unknown            | Excluded                             |
| Equatorial Guinea | 2001 | Census   | Not Available      | Unknown            | Included                             |
| Equatorial Guinea | 2015 | Census   | all ages only      | Unknown            | Included                             |
| Eritrea           | 1984 | Census   | all ages only      | De jure            | Included                             |
| Estonia           | 1950 | Registry | 5-year age groups  | NA                 | Included                             |
| Estonia           | 1951 | Registry | 5-year age groups  | NA                 | Included                             |
| Estonia           | 1952 | Registry | 5-year age groups  | NA                 | Included                             |
| Estonia           | 1953 | Registry | 5-year age groups  | NA                 | Included                             |
| Estonia           | 1954 | Registry | 5-year age groups  | NA                 | Included                             |
| Estonia           | 1955 | Registry | 5-year age groups  | NA                 | Included                             |
| Estonia           | 1956 | Registry | 5-year age groups  | NA                 | Included                             |
| Estonia           | 1957 | Registry | 5-year age groups  | NA                 | Included                             |
| Estonia           | 1958 | Registry | 5-year age groups  | NA                 | Included                             |
| Estonia           | 1959 | Census   | non-std age groups | De facto           | Included                             |
| Estonia           | 1959 | Registry | 5-year age groups  | NA                 | Included                             |
| Estonia           | 1960 | Registry | 5-year age groups  | NA                 | Included                             |
| Estonia           | 1961 | Registry | 5-year age groups  | NA                 | Included                             |
| Estonia           | 1962 | Registry | 5-year age groups  | NA                 | Included                             |
| Estonia           | 1963 | Registry | 5-year age groups  | NA                 | Included                             |
| Estonia           | 1964 | Registry | 5-year age groups  | NA                 | Included                             |
| Estonia           | 1965 | Registry | 5-year age groups  | NA                 | Included                             |
| Estonia           | 1966 | Registry | 5-year age groups  | NA                 | Included                             |
| Estonia           | 1967 | Registry | 5-year age groups  | NA                 | Included                             |
| Estonia           | 1968 | Registry | 5-year age groups  | NA                 | Included                             |
| Estonia           | 1969 | Registry | 5-year age groups  | NA                 | Included                             |
| Estonia           | 1970 | Census   | non-std age groups | De facto           | Included                             |
| Estonia           | 1970 | Registry | 5-year age groups  | NA                 | Included                             |
| Estonia           | 1971 | Registry | 5-year age groups  | NA                 | Included                             |
| Estonia           | 1972 | Registry | 5-year age groups  | NA                 | Included                             |
| Estonia           | 1973 | Registry | 5-year age groups  | NA                 | Included                             |
| Estonia           | 1974 | Registry | 5-year age groups  | NA                 | Included                             |
| Estonia           | 1975 | Registry | 5-year age groups  | NA                 | Included                             |
| Estonia           | 1976 | Registry | 5-year age groups  | NA                 | Included                             |
| Estonia           | 1977 | Registry | 5-year age groups  | NA                 | Included                             |
| Estonia           | 1978 | Registry | 5-year age groups  | NA                 | Included                             |
| Estonia           | 1979 | Census   | 5-year age groups  | De facto           | Included                             |
| Estonia           | 1979 | Registry | 5-year age groups  | NA                 | Included                             |
| Estonia           | 1980 | Registry | 5-year age groups  | NA                 | Included                             |
| Estonia           | 1981 | Registry | 5-year age groups  | NA                 | Included                             |
| Estonia           | 1982 | Registry | 5-year age groups  | NA                 | Included                             |
| Estonia           | 1983 | Registry | 5-year age groups  | NA                 | Included                             |
| Estonia           | 1984 | Registry | 5-year age groups  | NA                 | Included                             |
| Estonia           | 1985 | Registry | 5-year age groups  | NA                 | Included                             |
| Estonia           | 1986 | Registry | 5-year age groups  | NA                 | Included                             |
| Estonia           | 1987 | Registry | 5-year age groups  | NA                 | Included                             |
| Estonia           | 1988 | Registry | 5-year age groups  | NA                 | Included                             |
| Estonia           | 1989 | Census   | 5-year age groups  | De facto           | Included                             |
| Estonia           | 1989 | Registry | 5-year age groups  | NA                 | Included                             |
| Estonia           | 1990 | Registry | 5-year age groups  | NA                 | Included                             |
| Estonia           | 1991 | Registry | 5-year age groups  | NA                 | Included                             |
| Estonia           | 1992 | Registry | 5-year age groups  | NA                 | Included                             |
| Estonia           | 1993 | Registry | 5-year age groups  | NA                 | Included                             |

**Appendix Table 5. List of all confirmed censuses by location and year**

| Location                       | Year | Type     | Age detail         | Enumeration method | Included or excluded from estimation |
|--------------------------------|------|----------|--------------------|--------------------|--------------------------------------|
| Estonia                        | 1994 | Registry | 5-year age groups  | NA                 | Included                             |
| Estonia                        | 1995 | Registry | 5-year age groups  | NA                 | Included                             |
| Estonia                        | 1996 | Registry | 5-year age groups  | NA                 | Included                             |
| Estonia                        | 1997 | Registry | 5-year age groups  | NA                 | Included                             |
| Estonia                        | 1998 | Registry | 5-year age groups  | NA                 | Included                             |
| Estonia                        | 1999 | Registry | 5-year age groups  | NA                 | Included                             |
| Estonia                        | 2000 | Census   | 1-year age groups  | De jure            | Included                             |
| Estonia                        | 2000 | Registry | 5-year age groups  | NA                 | Included                             |
| Estonia                        | 2001 | Registry | 5-year age groups  | NA                 | Included                             |
| Estonia                        | 2002 | Registry | 5-year age groups  | NA                 | Included                             |
| Estonia                        | 2003 | Registry | 5-year age groups  | NA                 | Included                             |
| Estonia                        | 2004 | Registry | 5-year age groups  | NA                 | Included                             |
| Estonia                        | 2005 | Registry | 5-year age groups  | NA                 | Included                             |
| Estonia                        | 2006 | Registry | 5-year age groups  | NA                 | Included                             |
| Estonia                        | 2007 | Registry | 5-year age groups  | NA                 | Included                             |
| Estonia                        | 2008 | Registry | 5-year age groups  | NA                 | Included                             |
| Estonia                        | 2009 | Registry | 5-year age groups  | NA                 | Included                             |
| Estonia                        | 2010 | Registry | 5-year age groups  | NA                 | Included                             |
| Estonia                        | 2011 | Census   | 1-year age groups  | De jure            | Included                             |
| Estonia                        | 2011 | Registry | 5-year age groups  | NA                 | Included                             |
| Estonia                        | 2012 | Registry | 5-year age groups  | NA                 | Included                             |
| Estonia                        | 2013 | Registry | 5-year age groups  | NA                 | Included                             |
| Estonia                        | 2014 | Registry | 5-year age groups  | NA                 | Included                             |
| Estonia                        | 2015 | Registry | 5-year age groups  | NA                 | Included                             |
| Estonia                        | 2016 | Registry | 5-year age groups  | NA                 | Included                             |
| Estonia                        | 2017 | Registry | 5-year age groups  | NA                 | Included                             |
| Ethiopia                       | 1984 | Census   | 5-year age groups  | De facto           | Included                             |
| Ethiopia                       | 1994 | Census   | 1-year age groups  | Unknown            | Included                             |
| Ethiopia                       | 2007 | Census   | 1-year age groups  | Unknown            | Included                             |
| Federated States of Micronesia | 1994 | Census   | 5-year age groups  | De jure            | Included                             |
| Federated States of Micronesia | 2000 | Census   | non-std age groups | De jure            | Included                             |
| Federated States of Micronesia | 2010 | Census   | 5-year age groups  | De facto           | Included                             |
| Fiji                           | 1956 | Census   | 5-year age groups  | De facto           | Included                             |
| Fiji                           | 1966 | Census   | 5-year age groups  | De facto           | Included                             |
| Fiji                           | 1976 | Census   | 5-year age groups  | De facto           | Included                             |
| Fiji                           | 1986 | Census   | 1-year age groups  | De facto           | Included                             |
| Fiji                           | 1996 | Census   | 1-year age groups  | De facto           | Included                             |
| Fiji                           | 2007 | Census   | 5-year age groups  | De facto           | Included                             |
| Fiji                           | 2017 | Census   | 5-year age groups  | De jure            | Included                             |
| Finland                        | 1950 | Census   | 1-year age groups  | De jure            | Included                             |
| Finland                        | 1960 | Census   | 1-year age groups  | De jure            | Included                             |
| Finland                        | 1970 | Census   | 1-year age groups  | De jure            | Included                             |
| Finland                        | 1970 | Registry | 1-year age groups  | NA                 | Included                             |
| Finland                        | 1971 | Registry | 1-year age groups  | NA                 | Included                             |
| Finland                        | 1972 | Registry | 1-year age groups  | NA                 | Included                             |
| Finland                        | 1973 | Registry | 1-year age groups  | NA                 | Included                             |
| Finland                        | 1974 | Registry | 1-year age groups  | NA                 | Included                             |
| Finland                        | 1975 | Census   | 5-year age groups  | De jure            | Included                             |
| Finland                        | 1975 | Registry | 1-year age groups  | NA                 | Included                             |
| Finland                        | 1976 | Registry | 1-year age groups  | NA                 | Included                             |
| Finland                        | 1977 | Registry | 1-year age groups  | NA                 | Included                             |
| Finland                        | 1978 | Registry | 1-year age groups  | NA                 | Included                             |
| Finland                        | 1979 | Registry | 1-year age groups  | NA                 | Included                             |
| Finland                        | 1980 | Census   | non-std age groups | De jure            | Included                             |
| Finland                        | 1980 | Registry | 1-year age groups  | NA                 | Included                             |
| Finland                        | 1981 | Registry | 1-year age groups  | NA                 | Included                             |
| Finland                        | 1982 | Registry | 1-year age groups  | NA                 | Included                             |
| Finland                        | 1983 | Registry | 1-year age groups  | NA                 | Included                             |
| Finland                        | 1984 | Registry | 1-year age groups  | NA                 | Included                             |
| Finland                        | 1985 | Census   | 1-year age groups  | De jure            | Included                             |
| Finland                        | 1985 | Registry | 1-year age groups  | NA                 | Included                             |
| Finland                        | 1986 | Registry | 1-year age groups  | NA                 | Included                             |
| Finland                        | 1987 | Registry | 1-year age groups  | NA                 | Included                             |
| Finland                        | 1988 | Registry | 1-year age groups  | NA                 | Included                             |
| Finland                        | 1989 | Registry | 1-year age groups  | NA                 | Included                             |
| Finland                        | 1990 | Census   | 1-year age groups  | De jure            | Included                             |
| Finland                        | 1990 | Registry | 1-year age groups  | NA                 | Included                             |
| Finland                        | 1991 | Registry | 1-year age groups  | NA                 | Included                             |
| Finland                        | 1992 | Registry | 1-year age groups  | NA                 | Included                             |
| Finland                        | 1993 | Registry | 1-year age groups  | NA                 | Included                             |
| Finland                        | 1994 | Registry | 1-year age groups  | NA                 | Included                             |
| Finland                        | 1995 | Census   | non-std age groups | De jure            | Included                             |
| Finland                        | 1995 | Registry | 1-year age groups  | NA                 | Included                             |
| Finland                        | 1996 | Registry | 1-year age groups  | NA                 | Included                             |
| Finland                        | 1997 | Registry | 1-year age groups  | NA                 | Included                             |

**Appendix Table 5. List of all confirmed censuses by location and year**

| Location | Year | Type     | Age detail         | Enumeration method | Included or excluded from estimation |
|----------|------|----------|--------------------|--------------------|--------------------------------------|
| Finland  | 1998 | Registry | 1-year age groups  | NA                 | Included                             |
| Finland  | 1999 | Registry | 1-year age groups  | NA                 | Included                             |
| Finland  | 2000 | Census   | 1-year age groups  | De jure            | Included                             |
| Finland  | 2000 | Registry | 1-year age groups  | NA                 | Included                             |
| Finland  | 2001 | Registry | 1-year age groups  | NA                 | Included                             |
| Finland  | 2002 | Registry | 1-year age groups  | NA                 | Included                             |
| Finland  | 2003 | Registry | 1-year age groups  | NA                 | Included                             |
| Finland  | 2004 | Registry | 1-year age groups  | NA                 | Included                             |
| Finland  | 2005 | Registry | 1-year age groups  | NA                 | Included                             |
| Finland  | 2006 | Registry | 1-year age groups  | NA                 | Included                             |
| Finland  | 2007 | Registry | 1-year age groups  | NA                 | Included                             |
| Finland  | 2008 | Registry | 1-year age groups  | NA                 | Included                             |
| Finland  | 2009 | Registry | 1-year age groups  | NA                 | Included                             |
| Finland  | 2010 | Census   | 1-year age groups  | De jure            | Included                             |
| Finland  | 2010 | Registry | 1-year age groups  | NA                 | Included                             |
| Finland  | 2011 | Registry | 1-year age groups  | NA                 | Included                             |
| Finland  | 2012 | Registry | 1-year age groups  | NA                 | Included                             |
| Finland  | 2013 | Registry | 1-year age groups  | NA                 | Included                             |
| Finland  | 2014 | Registry | 1-year age groups  | NA                 | Included                             |
| Finland  | 2015 | Registry | 1-year age groups  | NA                 | Included                             |
| Finland  | 2016 | Registry | 1-year age groups  | NA                 | Included                             |
| Finland  | 2017 | Registry | 1-year age groups  | NA                 | Included                             |
| France   | 1954 | Census   | 5-year age groups  | De jure            | Included                             |
| France   | 1962 | Census   | 5-year age groups  | De jure            | Included                             |
| France   | 1968 | Census   | 5-year age groups  | De jure            | Included                             |
| France   | 1975 | Census   | 5-year age groups  | De jure            | Included                             |
| France   | 1982 | Census   | 5-year age groups  | De jure            | Included                             |
| France   | 1990 | Census   | 5-year age groups  | De jure            | Included                             |
| France   | 1999 | Census   | 5-year age groups  | De jure            | Included                             |
| France   | 2006 | Census   | 1-year age groups  | De jure            | Included                             |
| France   | 2007 | Census   | 1-year age groups  | De jure            | Included                             |
| France   | 2008 | Census   | 1-year age groups  | De jure            | Included                             |
| France   | 2009 | Census   | 1-year age groups  | De jure            | Included                             |
| France   | 2010 | Census   | 1-year age groups  | De jure            | Included                             |
| France   | 2011 | Census   | 1-year age groups  | De jure            | Included                             |
| France   | 2012 | Census   | 1-year age groups  | De jure            | Included                             |
| France   | 2013 | Census   | 1-year age groups  | De jure            | Included                             |
| France   | 2014 | Census   | 1-year age groups  | De jure            | Included                             |
| France   | 2015 | Census   | Not Available      | Unknown            | Excluded                             |
| Gabon    | 1951 | Census   | Not Available      | Unknown            | Excluded                             |
| Gabon    | 1956 | Census   | Not Available      | Unknown            | Excluded                             |
| Gabon    | 1960 | Census   | 5-year age groups  | De facto           | Included                             |
| Gabon    | 1969 | Census   | Not Available      | Unknown            | Excluded                             |
| Gabon    | 1980 | Census   | 5-year age groups  | De jure            | Excluded                             |
| Gabon    | 1993 | Census   | 1-year age groups  | De facto           | Included                             |
| Gabon    | 2003 | Census   | Not Available      | Unknown            | Excluded                             |
| Gabon    | 2013 | Census   | non-std age groups | De jure            | Included                             |
| Georgia  | 1959 | Census   | non-std age groups | De facto           | Included                             |
| Georgia  | 1970 | Census   | non-std age groups | De facto           | Included                             |
| Georgia  | 1979 | Census   | 5-year age groups  | De facto           | Included                             |
| Georgia  | 1989 | Census   | 5-year age groups  | De jure            | Included                             |
| Georgia  | 1989 | Census   | 5-year age groups  | De jure            | Included                             |
| Georgia  | 2002 | Census   | 1-year age groups  | De jure            | Included                             |
| Georgia  | 2014 | Census   | 1-year age groups  | De jure            | Included                             |
| Germany  | 1990 | Registry | 1-year age groups  | NA                 | Included                             |
| Germany  | 1991 | Registry | 1-year age groups  | NA                 | Included                             |
| Germany  | 1992 | Registry | 1-year age groups  | NA                 | Included                             |
| Germany  | 1993 | Registry | 1-year age groups  | NA                 | Included                             |
| Germany  | 1994 | Registry | 1-year age groups  | NA                 | Included                             |
| Germany  | 1995 | Registry | 1-year age groups  | NA                 | Included                             |
| Germany  | 1996 | Registry | 1-year age groups  | NA                 | Included                             |
| Germany  | 1997 | Registry | 1-year age groups  | NA                 | Included                             |
| Germany  | 1998 | Registry | 1-year age groups  | NA                 | Included                             |
| Germany  | 1999 | Registry | 1-year age groups  | NA                 | Included                             |
| Germany  | 2000 | Registry | 1-year age groups  | NA                 | Included                             |
| Germany  | 2001 | Registry | 1-year age groups  | NA                 | Included                             |
| Germany  | 2002 | Registry | 1-year age groups  | NA                 | Included                             |
| Germany  | 2003 | Registry | 1-year age groups  | NA                 | Included                             |
| Germany  | 2004 | Registry | 1-year age groups  | NA                 | Included                             |
| Germany  | 2005 | Registry | 1-year age groups  | NA                 | Included                             |
| Germany  | 2006 | Registry | 1-year age groups  | NA                 | Included                             |
| Germany  | 2007 | Registry | 1-year age groups  | NA                 | Included                             |
| Germany  | 2008 | Registry | 1-year age groups  | NA                 | Included                             |
| Germany  | 2009 | Registry | 1-year age groups  | NA                 | Included                             |
| Germany  | 2010 | Registry | 1-year age groups  | NA                 | Included                             |

**Appendix Table 5. List of all confirmed censuses by location and year**

| Location                      | Year | Type     | Age detail         | Enumeration method | Included or excluded from estimation |
|-------------------------------|------|----------|--------------------|--------------------|--------------------------------------|
| Germany                       | 2011 | Census   | 1-year age groups  | De jure            | Included                             |
| Germany                       | 2011 | Registry | 1-year age groups  | NA                 | Excluded                             |
| Germany                       | 2012 | Registry | 1-year age groups  | NA                 | Excluded                             |
| Germany                       | 2013 | Registry | 1-year age groups  | NA                 | Excluded                             |
| Germany                       | 2014 | Registry | 1-year age groups  | NA                 | Excluded                             |
| Germany                       | 2015 | Registry | 1-year age groups  | NA                 | Excluded                             |
| Germany                       | 2016 | Registry | 1-year age groups  | NA                 | Excluded                             |
| Germany (Democratic Republic) | 1950 | Census   | 5-year age groups  | De jure            | Included                             |
| Germany (Democratic Republic) | 1964 | Census   | 5-year age groups  | De jure            | Included                             |
| Germany (Democratic Republic) | 1971 | Census   | 1-year age groups  | De jure            | Included                             |
| Germany (Democratic Republic) | 1981 | Census   | 1-year age groups  | De jure            | Included                             |
| Germany (Federal Republic of) | 1950 | Census   | all ages only      | De jure            | Included                             |
| Germany (Federal Republic of) | 1961 | Census   | 5-year age groups  | De jure            | Included                             |
| Germany (Federal Republic of) | 1970 | Census   | 1-year age groups  | De jure            | Included                             |
| Germany (Federal Republic of) | 1970 | Registry | 1-year age groups  | NA                 | Included                             |
| Germany (Federal Republic of) | 1971 | Registry | 1-year age groups  | NA                 | Included                             |
| Germany (Federal Republic of) | 1972 | Registry | 1-year age groups  | NA                 | Included                             |
| Germany (Federal Republic of) | 1973 | Registry | 1-year age groups  | NA                 | Included                             |
| Germany (Federal Republic of) | 1974 | Registry | 1-year age groups  | NA                 | Included                             |
| Germany (Federal Republic of) | 1975 | Registry | 1-year age groups  | NA                 | Included                             |
| Germany (Federal Republic of) | 1976 | Registry | 1-year age groups  | NA                 | Included                             |
| Germany (Federal Republic of) | 1977 | Registry | 1-year age groups  | NA                 | Included                             |
| Germany (Federal Republic of) | 1978 | Registry | 1-year age groups  | NA                 | Included                             |
| Germany (Federal Republic of) | 1979 | Registry | 1-year age groups  | NA                 | Included                             |
| Germany (Federal Republic of) | 1980 | Registry | 1-year age groups  | NA                 | Included                             |
| Germany (Federal Republic of) | 1981 | Registry | 1-year age groups  | NA                 | Included                             |
| Germany (Federal Republic of) | 1982 | Registry | 1-year age groups  | NA                 | Included                             |
| Germany (Federal Republic of) | 1983 | Registry | 1-year age groups  | NA                 | Included                             |
| Germany (Federal Republic of) | 1984 | Registry | 1-year age groups  | NA                 | Included                             |
| Germany (Federal Republic of) | 1985 | Registry | 1-year age groups  | NA                 | Included                             |
| Germany (Federal Republic of) | 1986 | Registry | 1-year age groups  | NA                 | Included                             |
| Germany (Federal Republic of) | 1987 | Census   | 1-year age groups  | De jure            | Included                             |
| Germany (Federal Republic of) | 1987 | Registry | 1-year age groups  | NA                 | Included                             |
| Germany (Federal Republic of) | 1988 | Registry | 1-year age groups  | NA                 | Included                             |
| Germany (Federal Republic of) | 1989 | Registry | 1-year age groups  | NA                 | Included                             |
| Ghana                         | 1960 | Census   | 1-year age groups  | De facto           | Included                             |
| Ghana                         | 1970 | Census   | 1-year age groups  | De facto           | Included                             |
| Ghana                         | 1984 | Census   | 1-year age groups  | De facto           | Included                             |
| Ghana                         | 2000 | Census   | 5-year age groups  | De facto           | Included                             |
| Ghana                         | 2010 | Census   | 1-year age groups  | De facto           | Included                             |
| Greece                        | 1951 | Census   | 5-year age groups  | De facto           | Included                             |
| Greece                        | 1961 | Census   | 5-year age groups  | De facto           | Included                             |
| Greece                        | 1971 | Census   | 5-year age groups  | De facto           | Included                             |
| Greece                        | 1981 | Census   | 1-year age groups  | De facto           | Included                             |
| Greece                        | 1991 | Census   | 1-year age groups  | De facto           | Included                             |
| Greece                        | 2001 | Census   | 1-year age groups  | De jure            | Included                             |
| Greece                        | 2011 | Census   | 1-year age groups  | De facto           | Included                             |
| Greenland                     | 1951 | Census   | 5-year age groups  | De jure            | Included                             |
| Greenland                     | 1955 | Census   | 5-year age groups  | De jure            | Included                             |
| Greenland                     | 1960 | Census   | non-std age groups | De jure            | Included                             |
| Greenland                     | 1965 | Census   | 1-year age groups  | De jure            | Included                             |
| Greenland                     | 1970 | Census   | 1-year age groups  | De jure            | Included                             |
| Greenland                     | 1976 | Census   | 5-year age groups  | De jure            | Included                             |
| Greenland                     | 1977 | Registry | 1-year age groups  | NA                 | Included                             |
| Greenland                     | 1978 | Registry | 1-year age groups  | NA                 | Included                             |
| Greenland                     | 1979 | Registry | 1-year age groups  | NA                 | Included                             |
| Greenland                     | 1980 | Registry | 1-year age groups  | NA                 | Included                             |
| Greenland                     | 1981 | Registry | 1-year age groups  | NA                 | Included                             |
| Greenland                     | 1982 | Registry | 1-year age groups  | NA                 | Included                             |
| Greenland                     | 1983 | Registry | 1-year age groups  | NA                 | Included                             |
| Greenland                     | 1984 | Registry | 1-year age groups  | NA                 | Included                             |
| Greenland                     | 1985 | Registry | 1-year age groups  | NA                 | Included                             |
| Greenland                     | 1986 | Registry | 1-year age groups  | NA                 | Included                             |
| Greenland                     | 1987 | Registry | 1-year age groups  | NA                 | Included                             |
| Greenland                     | 1988 | Registry | 1-year age groups  | NA                 | Included                             |
| Greenland                     | 1989 | Registry | 1-year age groups  | NA                 | Included                             |
| Greenland                     | 1990 | Registry | 1-year age groups  | NA                 | Included                             |
| Greenland                     | 1991 | Registry | 1-year age groups  | NA                 | Included                             |
| Greenland                     | 1992 | Registry | 1-year age groups  | NA                 | Included                             |
| Greenland                     | 1993 | Registry | 1-year age groups  | NA                 | Included                             |
| Greenland                     | 1994 | Registry | 1-year age groups  | NA                 | Included                             |
| Greenland                     | 1995 | Registry | 1-year age groups  | NA                 | Included                             |
| Greenland                     | 1996 | Registry | 1-year age groups  | NA                 | Included                             |
| Greenland                     | 1997 | Registry | 1-year age groups  | NA                 | Included                             |
| Greenland                     | 1998 | Registry | 1-year age groups  | NA                 | Included                             |

**Appendix Table 5. List of all confirmed censuses by location and year**

| Location                                         | Year | Type     | Age detail         | Enumeration method | Included or excluded from estimation |
|--------------------------------------------------|------|----------|--------------------|--------------------|--------------------------------------|
| Greenland                                        | 1999 | Registry | 1-year age groups  | NA                 | Included                             |
| Greenland                                        | 2000 | Census   | 5-year age groups  | De jure            | Included                             |
| Greenland                                        | 2000 | Registry | 1-year age groups  | NA                 | Included                             |
| Greenland                                        | 2001 | Registry | 1-year age groups  | NA                 | Included                             |
| Greenland                                        | 2002 | Registry | 1-year age groups  | NA                 | Included                             |
| Greenland                                        | 2003 | Registry | 1-year age groups  | NA                 | Included                             |
| Greenland                                        | 2004 | Registry | 1-year age groups  | NA                 | Included                             |
| Greenland                                        | 2005 | Registry | 1-year age groups  | NA                 | Included                             |
| Greenland                                        | 2006 | Registry | 1-year age groups  | NA                 | Included                             |
| Greenland                                        | 2007 | Registry | 1-year age groups  | NA                 | Included                             |
| Greenland                                        | 2008 | Registry | 1-year age groups  | NA                 | Included                             |
| Greenland                                        | 2009 | Registry | 1-year age groups  | NA                 | Included                             |
| Greenland                                        | 2010 | Census   | Not Available      | Unknown            | Excluded                             |
| Greenland                                        | 2010 | Registry | 1-year age groups  | NA                 | Included                             |
| Greenland                                        | 2011 | Registry | 1-year age groups  | NA                 | Included                             |
| Greenland                                        | 2012 | Registry | 1-year age groups  | NA                 | Included                             |
| Greenland                                        | 2013 | Registry | 1-year age groups  | NA                 | Included                             |
| Greenland                                        | 2014 | Registry | 1-year age groups  | NA                 | Included                             |
| Greenland                                        | 2015 | Registry | 1-year age groups  | NA                 | Included                             |
| Greenland                                        | 2016 | Registry | 1-year age groups  | NA                 | Included                             |
| Greenland                                        | 2017 | Registry | 1-year age groups  | NA                 | Included                             |
| Grenada                                          | 1960 | Census   | 5-year age groups  | De facto           | Included                             |
| Grenada                                          | 1970 | Census   | 5-year age groups  | De facto           | Included                             |
| Grenada                                          | 1981 | Census   | 1-year age groups  | De facto           | Included                             |
| Grenada                                          | 1991 | Census   | 5-year age groups  | De facto           | Included                             |
| Grenada                                          | 2001 | Census   | 5-year age groups  | De facto           | Included                             |
| Grenada                                          | 2011 | Census   | 5-year age groups  | De jure            | Included                             |
| Guam                                             | 1950 | Census   | non-std age groups | De jure            | Included                             |
| Guam                                             | 1960 | Census   | non-std age groups | De jure            | Included                             |
| Guam                                             | 1970 | Census   | 5-year age groups  | De jure            | Included                             |
| Guam                                             | 1980 | Census   | 1-year age groups  | De jure            | Included                             |
| Guam                                             | 1990 | Census   | non-std age groups | De jure            | Included                             |
| Guam                                             | 2000 | Census   | 1-year age groups  | De jure            | Included                             |
| Guam                                             | 2010 | Census   | 5-year age groups  | De jure            | Included                             |
| Guatemala                                        | 1950 | Census   | 1-year age groups  | De jure            | Included                             |
| Guatemala                                        | 1964 | Census   | 1-year age groups  | De jure            | Included                             |
| Guatemala                                        | 1973 | Census   | 1-year age groups  | De jure            | Included                             |
| Guatemala                                        | 1981 | Census   | 1-year age groups  | De jure            | Included                             |
| Guatemala                                        | 1994 | Census   | 1-year age groups  | De jure            | Included                             |
| Guatemala                                        | 2002 | Census   | all ages only      | De jure            | Included                             |
| Guinea                                           | 1951 | Census   | Not Available      | Unknown            | Excluded                             |
| Guinea                                           | 1955 | Census   | Not Available      | Unknown            | Excluded                             |
| Guinea                                           | 1966 | Census   | all ages only      | Unknown            | Included                             |
| Guinea                                           | 1983 | Census   | 1-year age groups  | Unknown            | Included                             |
| Guinea                                           | 1996 | Census   | 5-year age groups  | De facto           | Included                             |
| Guinea                                           | 2014 | Census   | 1-year age groups  | De facto           | Included                             |
| Guinea-Bissau                                    | 1950 | Census   | 5-year age groups  | De facto           | Included                             |
| Guinea-Bissau                                    | 1960 | Census   | 5-year age groups  | Unknown            | Included                             |
| Guinea-Bissau                                    | 1979 | Census   | 5-year age groups  | De jure            | Included                             |
| Guinea-Bissau                                    | 1991 | Census   | non-std age groups | De facto           | Included                             |
| Guinea-Bissau                                    | 2009 | Census   | 1-year age groups  | De jure            | Included                             |
| Guyana                                           | 1960 | Census   | 5-year age groups  | De facto           | Included                             |
| Guyana                                           | 1970 | Census   | 1-year age groups  | De facto           | Included                             |
| Guyana                                           | 1980 | Census   | 1-year age groups  | De facto           | Included                             |
| Guyana                                           | 1991 | Census   | 5-year age groups  | De facto           | Included                             |
| Guyana                                           | 2002 | Census   | 5-year age groups  | De facto           | Included                             |
| Guyana                                           | 2012 | Census   | 5-year age groups  | De jure            | Included                             |
| Haiti                                            | 1950 | Census   | 1-year age groups  | De jure            | Included                             |
| Haiti                                            | 1971 | Census   | 1-year age groups  | De jure            | Included                             |
| Haiti                                            | 1982 | Census   | 1-year age groups  | De jure            | Included                             |
| Haiti                                            | 2003 | Census   | 1-year age groups  | Unknown            | Included                             |
| Honduras                                         | 1950 | Census   | 5-year age groups  | De facto           | Included                             |
| Honduras                                         | 1961 | Census   | 5-year age groups  | De facto           | Included                             |
| Honduras                                         | 1974 | Census   | 5-year age groups  | De facto           | Included                             |
| Honduras                                         | 1988 | Census   | 1-year age groups  | De facto           | Included                             |
| Honduras                                         | 2001 | Census   | 1-year age groups  | De jure            | Included                             |
| Honduras                                         | 2013 | Census   | 1-year age groups  | De facto           | Included                             |
| Hong Kong Special Administrative Region of China | 1961 | Census   | 5-year age groups  | De facto           | Included                             |
| Hong Kong Special Administrative Region of China | 1971 | Census   | 1-year age groups  | De facto           | Included                             |
| Hong Kong Special Administrative Region of China | 1981 | Census   | 1-year age groups  | De facto           | Included                             |
| Hong Kong Special Administrative Region of China | 1986 | Census   | 5-year age groups  | De facto           | Included                             |
| Hong Kong Special Administrative Region of China | 1991 | Census   | 5-year age groups  | De facto           | Included                             |
| Hong Kong Special Administrative Region of China | 1996 | Census   | 1-year age groups  | De facto           | Included                             |
| Hong Kong Special Administrative Region of China | 2001 | Census   | 1-year age groups  | De jure            | Included                             |
| Hong Kong Special Administrative Region of China | 2006 | Census   | 1-year age groups  | De jure            | Included                             |



**Appendix Table 5. List of all confirmed censuses by location and year**

| Location                                         | Year | Type     | Age detail        | Enumeration method | Included or excluded from estimation |
|--------------------------------------------------|------|----------|-------------------|--------------------|--------------------------------------|
| Hong Kong Special Administrative Region of China | 2011 | Census   | 1-year age groups | De jure            | Included                             |
| Hong Kong Special Administrative Region of China | 2016 | Census   | 1-year age groups | De jure            | Included                             |
| Hungary                                          | 1960 | Census   | 1-year age groups | De facto           | Included                             |
| Hungary                                          | 1970 | Census   | 1-year age groups | De facto           | Included                             |
| Hungary                                          | 1980 | Census   | 1-year age groups | Unknown            | Included                             |
| Hungary                                          | 1990 | Census   | 1-year age groups | Unknown            | Included                             |
| Hungary                                          | 2001 | Census   | 1-year age groups | Unknown            | Included                             |
| Hungary                                          | 2011 | Census   | 1-year age groups | De facto           | Included                             |
| Hungary                                          | 2012 | Census   | 1-year age groups | Unknown            | Excluded                             |
| Hungary                                          | 2013 | Census   | 1-year age groups | Unknown            | Excluded                             |
| Hungary                                          | 2014 | Census   | 1-year age groups | Unknown            | Excluded                             |
| Hungary                                          | 2015 | Census   | 1-year age groups | Unknown            | Excluded                             |
| Hungary                                          | 2016 | Census   | 1-year age groups | Unknown            | Excluded                             |
| Hungary                                          | 2017 | Census   | 1-year age groups | Unknown            | Excluded                             |
| Iceland                                          | 1950 | Census   | 5-year age groups | De jure            | Included                             |
| Iceland                                          | 1950 | Registry | 1-year age groups | NA                 | Included                             |
| Iceland                                          | 1951 | Registry | 1-year age groups | NA                 | Included                             |
| Iceland                                          | 1952 | Registry | 1-year age groups | NA                 | Included                             |
| Iceland                                          | 1953 | Registry | 1-year age groups | NA                 | Included                             |
| Iceland                                          | 1954 | Registry | 1-year age groups | NA                 | Included                             |
| Iceland                                          | 1955 | Registry | 1-year age groups | NA                 | Included                             |
| Iceland                                          | 1956 | Registry | 1-year age groups | NA                 | Included                             |
| Iceland                                          | 1957 | Registry | 1-year age groups | NA                 | Included                             |
| Iceland                                          | 1958 | Registry | 1-year age groups | NA                 | Included                             |
| Iceland                                          | 1959 | Registry | 1-year age groups | NA                 | Included                             |
| Iceland                                          | 1960 | Census   | 1-year age groups | De jure            | Included                             |
| Iceland                                          | 1960 | Registry | 1-year age groups | NA                 | Included                             |
| Iceland                                          | 1961 | Registry | 1-year age groups | NA                 | Included                             |
| Iceland                                          | 1962 | Registry | 1-year age groups | NA                 | Included                             |
| Iceland                                          | 1963 | Registry | 1-year age groups | NA                 | Included                             |
| Iceland                                          | 1964 | Registry | 1-year age groups | NA                 | Included                             |
| Iceland                                          | 1965 | Registry | 1-year age groups | NA                 | Included                             |
| Iceland                                          | 1966 | Registry | 1-year age groups | NA                 | Included                             |
| Iceland                                          | 1967 | Registry | 1-year age groups | NA                 | Included                             |
| Iceland                                          | 1968 | Registry | 1-year age groups | NA                 | Included                             |
| Iceland                                          | 1969 | Registry | 1-year age groups | NA                 | Included                             |
| Iceland                                          | 1970 | Census   | 5-year age groups | De jure            | Included                             |
| Iceland                                          | 1970 | Registry | 1-year age groups | NA                 | Included                             |
| Iceland                                          | 1971 | Registry | 1-year age groups | NA                 | Included                             |
| Iceland                                          | 1972 | Registry | 1-year age groups | NA                 | Included                             |
| Iceland                                          | 1973 | Registry | 1-year age groups | NA                 | Included                             |
| Iceland                                          | 1974 | Registry | 1-year age groups | NA                 | Included                             |
| Iceland                                          | 1975 | Registry | 1-year age groups | NA                 | Included                             |
| Iceland                                          | 1976 | Registry | 1-year age groups | NA                 | Included                             |
| Iceland                                          | 1977 | Registry | 1-year age groups | NA                 | Included                             |
| Iceland                                          | 1978 | Registry | 1-year age groups | NA                 | Included                             |
| Iceland                                          | 1979 | Registry | 1-year age groups | NA                 | Included                             |
| Iceland                                          | 1980 | Registry | 1-year age groups | NA                 | Included                             |
| Iceland                                          | 1981 | Census   | Not Available     | Unknown            | Excluded                             |
| Iceland                                          | 1981 | Registry | 1-year age groups | NA                 | Included                             |
| Iceland                                          | 1982 | Registry | 1-year age groups | NA                 | Included                             |
| Iceland                                          | 1983 | Registry | 1-year age groups | NA                 | Included                             |
| Iceland                                          | 1984 | Registry | 1-year age groups | NA                 | Included                             |
| Iceland                                          | 1985 | Registry | 1-year age groups | NA                 | Included                             |
| Iceland                                          | 1986 | Registry | 1-year age groups | NA                 | Included                             |
| Iceland                                          | 1987 | Registry | 1-year age groups | NA                 | Included                             |
| Iceland                                          | 1988 | Registry | 1-year age groups | NA                 | Included                             |
| Iceland                                          | 1989 | Registry | 1-year age groups | NA                 | Included                             |
| Iceland                                          | 1990 | Registry | 1-year age groups | NA                 | Included                             |
| Iceland                                          | 1991 | Registry | 1-year age groups | NA                 | Included                             |
| Iceland                                          | 1992 | Registry | 1-year age groups | NA                 | Included                             |
| Iceland                                          | 1993 | Registry | 1-year age groups | NA                 | Included                             |
| Iceland                                          | 1994 | Registry | 1-year age groups | NA                 | Included                             |
| Iceland                                          | 1995 | Registry | 1-year age groups | NA                 | Included                             |
| Iceland                                          | 1996 | Registry | 1-year age groups | NA                 | Included                             |
| Iceland                                          | 1997 | Registry | 1-year age groups | NA                 | Included                             |
| Iceland                                          | 1998 | Registry | 1-year age groups | NA                 | Included                             |
| Iceland                                          | 1999 | Registry | 1-year age groups | NA                 | Included                             |
| Iceland                                          | 2000 | Registry | 1-year age groups | NA                 | Included                             |
| Iceland                                          | 2001 | Registry | 1-year age groups | NA                 | Included                             |
| Iceland                                          | 2002 | Registry | 1-year age groups | NA                 | Included                             |
| Iceland                                          | 2003 | Registry | 1-year age groups | NA                 | Included                             |
| Iceland                                          | 2004 | Registry | 1-year age groups | NA                 | Included                             |
| Iceland                                          | 2005 | Registry | 1-year age groups | NA                 | Included                             |
| Iceland                                          | 2006 | Registry | 1-year age groups | NA                 | Included                             |

**Appendix Table 5. List of all confirmed censuses by location and year**

| Location  | Year | Type     | Age detail         | Enumeration method | Included or excluded from estimation |
|-----------|------|----------|--------------------|--------------------|--------------------------------------|
| Iceland   | 2007 | Registry | 1-year age groups  | NA                 | Included                             |
| Iceland   | 2008 | Registry | 1-year age groups  | NA                 | Included                             |
| Iceland   | 2009 | Registry | 1-year age groups  | NA                 | Included                             |
| Iceland   | 2010 | Registry | 1-year age groups  | NA                 | Included                             |
| Iceland   | 2011 | Census   | 5-year age groups  | De jure            | Included                             |
| Iceland   | 2011 | Registry | 1-year age groups  | NA                 | Included                             |
| Iceland   | 2012 | Registry | 1-year age groups  | NA                 | Included                             |
| Iceland   | 2013 | Registry | 1-year age groups  | NA                 | Included                             |
| Iceland   | 2014 | Registry | 1-year age groups  | NA                 | Included                             |
| Iceland   | 2015 | Registry | 1-year age groups  | NA                 | Included                             |
| Iceland   | 2016 | Registry | 1-year age groups  | NA                 | Included                             |
| Iceland   | 2017 | Registry | 1-year age groups  | NA                 | Included                             |
| India     | 1951 | Census   | 1-year age groups  | De facto           | Included                             |
| India     | 1961 | Census   | 1-year age groups  | Unknown            | Included                             |
| India     | 1971 | Census   | 5-year age groups  | Unknown            | Included                             |
| India     | 1981 | Census   | 1-year age groups  | Unknown            | Included                             |
| India     | 1991 | Census   | 5-year age groups  | De facto           | Included                             |
| India     | 2001 | Census   | 5-year age groups  | De facto           | Included                             |
| India     | 2011 | Census   | 1-year age groups  | De facto           | Included                             |
| Indonesia | 1961 | Census   | non-std age groups | De facto           | Included                             |
| Indonesia | 1971 | Census   | 1-year age groups  | De facto           | Included                             |
| Indonesia | 1980 | Census   | 1-year age groups  | Unknown            | Included                             |
| Indonesia | 1990 | Census   | 1-year age groups  | De jure            | Included                             |
| Indonesia | 2000 | Census   | 1-year age groups  | De jure            | Excluded                             |
| Indonesia | 2010 | Census   | 1-year age groups  | De jure            | Included                             |
| Iran      | 1956 | Census   | 5-year age groups  | De facto           | Included                             |
| Iran      | 1966 | Census   | 1-year age groups  | De facto           | Included                             |
| Iran      | 1976 | Census   | 5-year age groups  | De facto           | Included                             |
| Iran      | 1986 | Census   | 5-year age groups  | De facto           | Included                             |
| Iran      | 1996 | Census   | 1-year age groups  | De jure            | Included                             |
| Iran      | 2006 | Census   | 1-year age groups  | De jure            | Included                             |
| Iran      | 2011 | Census   | 1-year age groups  | De jure            | Included                             |
| Iran      | 2016 | Census   | 1-year age groups  | De jure            | Included                             |
| Iraq      | 1957 | Census   | non-std age groups | De facto           | Included                             |
| Iraq      | 1965 | Census   | 1-year age groups  | De facto           | Included                             |
| Iraq      | 1977 | Census   | 5-year age groups  | De facto           | Included                             |
| Iraq      | 1987 | Census   | 5-year age groups  | De facto           | Included                             |
| Iraq      | 1997 | Census   | 5-year age groups  | De facto           | Excluded                             |
| Ireland   | 1951 | Census   | 1-year age groups  | De facto           | Included                             |
| Ireland   | 1956 | Census   | 5-year age groups  | De jure            | Included                             |
| Ireland   | 1961 | Census   | 5-year age groups  | De facto           | Included                             |
| Ireland   | 1966 | Census   | 5-year age groups  | De facto           | Included                             |
| Ireland   | 1971 | Census   | 1-year age groups  | De facto           | Included                             |
| Ireland   | 1979 | Census   | 5-year age groups  | De facto           | Included                             |
| Ireland   | 1981 | Census   | 5-year age groups  | De facto           | Included                             |
| Ireland   | 1986 | Census   | 5-year age groups  | De facto           | Included                             |
| Ireland   | 1991 | Census   | 1-year age groups  | De facto           | Included                             |
| Ireland   | 1996 | Census   | 1-year age groups  | De facto           | Included                             |
| Ireland   | 2002 | Census   | 1-year age groups  | De facto           | Included                             |
| Ireland   | 2006 | Census   | 1-year age groups  | De facto           | Included                             |
| Ireland   | 2011 | Census   | 1-year age groups  | De facto           | Included                             |
| Ireland   | 2016 | Census   | 1-year age groups  | De jure            | Included                             |
| Israel    | 1961 | Census   | non-std age groups | De jure            | Included                             |
| Israel    | 1972 | Census   | 5-year age groups  | De jure            | Included                             |
| Israel    | 1983 | Census   | 5-year age groups  | De jure            | Included                             |
| Israel    | 1995 | Census   | 1-year age groups  | De facto           | Included                             |
| Israel    | 2008 | Census   | 1-year age groups  | De facto           | Included                             |
| Italy     | 1951 | Census   | 5-year age groups  | De jure            | Included                             |
| Italy     | 1961 | Census   | non-std age groups | De jure            | Included                             |
| Italy     | 1971 | Census   | 1-year age groups  | De jure            | Included                             |
| Italy     | 1981 | Census   | non-std age groups | De facto           | Included                             |
| Italy     | 1991 | Census   | non-std age groups | De facto           | Included                             |
| Italy     | 2001 | Census   | 1-year age groups  | De jure            | Included                             |
| Italy     | 2002 | Registry | 1-year age groups  | NA                 | Included                             |
| Italy     | 2003 | Registry | 1-year age groups  | NA                 | Included                             |
| Italy     | 2004 | Registry | 1-year age groups  | NA                 | Included                             |
| Italy     | 2005 | Registry | 1-year age groups  | NA                 | Included                             |
| Italy     | 2006 | Registry | 1-year age groups  | NA                 | Included                             |
| Italy     | 2007 | Registry | 1-year age groups  | NA                 | Included                             |
| Italy     | 2008 | Registry | 1-year age groups  | NA                 | Included                             |
| Italy     | 2009 | Registry | 1-year age groups  | NA                 | Included                             |
| Italy     | 2010 | Registry | 1-year age groups  | NA                 | Included                             |
| Italy     | 2011 | Census   | 1-year age groups  | De jure            | Included                             |
| Italy     | 2011 | Registry | 1-year age groups  | NA                 | Included                             |
| Italy     | 2012 | Registry | 1-year age groups  | NA                 | Excluded                             |

**Appendix Table 5. List of all confirmed censuses by location and year**

| Location   | Year | Type     | Age detail         | Enumeration method | Included or excluded from estimation |
|------------|------|----------|--------------------|--------------------|--------------------------------------|
| Italy      | 2013 | Registry | 1-year age groups  | NA                 | Excluded                             |
| Italy      | 2014 | Registry | 1-year age groups  | NA                 | Included                             |
| Italy      | 2015 | Registry | 1-year age groups  | NA                 | Included                             |
| Italy      | 2016 | Registry | 1-year age groups  | NA                 | Included                             |
| Italy      | 2017 | Registry | 1-year age groups  | NA                 | Included                             |
| Jamaica    | 1953 | Census   | 5-year age groups  | De jure            | Included                             |
| Jamaica    | 1960 | Census   | 5-year age groups  | De jure            | Included                             |
| Jamaica    | 1970 | Census   | 5-year age groups  | De jure            | Included                             |
| Jamaica    | 1982 | Census   | 1-year age groups  | De jure            | Included                             |
| Jamaica    | 1991 | Census   | 1-year age groups  | De jure            | Included                             |
| Jamaica    | 2001 | Census   | 1-year age groups  | De jure            | Included                             |
| Jamaica    | 2011 | Census   | 1-year age groups  | De jure            | Included                             |
| Japan      | 1950 | Census   | 1-year age groups  | De facto           | Included                             |
| Japan      | 1955 | Census   | 5-year age groups  | De facto           | Included                             |
| Japan      | 1960 | Census   | 5-year age groups  | De facto           | Included                             |
| Japan      | 1965 | Census   | 1-year age groups  | De facto           | Included                             |
| Japan      | 1970 | Census   | 1-year age groups  | De facto           | Included                             |
| Japan      | 1975 | Census   | 5-year age groups  | De facto           | Included                             |
| Japan      | 1980 | Census   | 1-year age groups  | De facto           | Included                             |
| Japan      | 1985 | Census   | 5-year age groups  | De facto           | Included                             |
| Japan      | 1990 | Census   | 1-year age groups  | De facto           | Included                             |
| Japan      | 1995 | Census   | 1-year age groups  | De facto           | Included                             |
| Japan      | 2000 | Census   | 1-year age groups  | De jure            | Included                             |
| Japan      | 2005 | Census   | 1-year age groups  | De jure            | Included                             |
| Japan      | 2010 | Census   | 1-year age groups  | De jure            | Included                             |
| Japan      | 2015 | Census   | 1-year age groups  | De jure            | Included                             |
| Jordan     | 1961 | Census   | non-std age groups | De facto           | Excluded                             |
| Jordan     | 1979 | Census   | 5-year age groups  | De facto           | Included                             |
| Jordan     | 1994 | Census   | 5-year age groups  | De facto           | Included                             |
| Jordan     | 2004 | Census   | 5-year age groups  | De facto           | Included                             |
| Jordan     | 2015 | Census   | 1-year age groups  | De facto           | Included                             |
| Kazakhstan | 1959 | Census   | non-std age groups | De facto           | Included                             |
| Kazakhstan | 1970 | Census   | non-std age groups | De facto           | Included                             |
| Kazakhstan | 1979 | Census   | 5-year age groups  | De facto           | Included                             |
| Kazakhstan | 1989 | Census   | 1-year age groups  | De facto           | Included                             |
| Kazakhstan | 1999 | Census   | 1-year age groups  | De jure            | Included                             |
| Kazakhstan | 2009 | Census   | 5-year age groups  | De facto           | Included                             |
| Kazakhstan | 2010 | Registry | all ages only      | NA                 | Included                             |
| Kazakhstan | 2011 | Registry | all ages only      | NA                 | Included                             |
| Kazakhstan | 2012 | Registry | all ages only      | NA                 | Included                             |
| Kazakhstan | 2013 | Registry | all ages only      | NA                 | Included                             |
| Kazakhstan | 2014 | Registry | all ages only      | NA                 | Included                             |
| Kazakhstan | 2015 | Registry | all ages only      | NA                 | Included                             |
| Kazakhstan | 2016 | Registry | all ages only      | NA                 | Included                             |
| Kenya      | 1962 | Census   | 1-year age groups  | De facto           | Included                             |
| Kenya      | 1969 | Census   | 1-year age groups  | De facto           | Included                             |
| Kenya      | 1979 | Census   | 5-year age groups  | De facto           | Included                             |
| Kenya      | 1989 | Census   | 1-year age groups  | De jure            | Included                             |
| Kenya      | 1999 | Census   | 5-year age groups  | De facto           | Included                             |
| Kenya      | 2009 | Census   | 1-year age groups  | De facto           | Included                             |
| Kiribati   | 1963 | Census   | 5-year age groups  | De facto           | Included                             |
| Kiribati   | 1968 | Census   | 5-year age groups  | De facto           | Included                             |
| Kiribati   | 1973 | Census   | 5-year age groups  | De facto           | Included                             |
| Kiribati   | 1978 | Census   | 5-year age groups  | De facto           | Included                             |
| Kiribati   | 1985 | Census   | 5-year age groups  | De facto           | Included                             |
| Kiribati   | 1990 | Census   | 5-year age groups  | De facto           | Included                             |
| Kiribati   | 1995 | Census   | 5-year age groups  | De facto           | Included                             |
| Kiribati   | 2000 | Census   | 5-year age groups  | De facto           | Included                             |
| Kiribati   | 2005 | Census   | 5-year age groups  | De facto           | Included                             |
| Kiribati   | 2010 | Census   | 1-year age groups  | De facto           | Included                             |
| Kiribati   | 2015 | Census   | 5-year age groups  | De jure            | Included                             |
| Kuwait     | 1957 | Census   | 5-year age groups  | De facto           | Included                             |
| Kuwait     | 1961 | Census   | non-std age groups | De facto           | Included                             |
| Kuwait     | 1965 | Census   | 1-year age groups  | De facto           | Included                             |
| Kuwait     | 1970 | Census   | 1-year age groups  | De facto           | Included                             |
| Kuwait     | 1975 | Census   | 5-year age groups  | De facto           | Included                             |
| Kuwait     | 1980 | Census   | 5-year age groups  | De facto           | Included                             |
| Kuwait     | 1985 | Census   | 1-year age groups  | De facto           | Included                             |
| Kuwait     | 1995 | Census   | 5-year age groups  | De facto           | Included                             |
| Kuwait     | 2005 | Census   | 5-year age groups  | De facto           | Included                             |
| Kuwait     | 2011 | Census   | 1-year age groups  | De facto           | Included                             |
| Kyrgyzstan | 1959 | Census   | non-std age groups | De facto           | Included                             |
| Kyrgyzstan | 1970 | Census   | non-std age groups | De facto           | Included                             |
| Kyrgyzstan | 1979 | Census   | 5-year age groups  | De facto           | Included                             |
| Kyrgyzstan | 1989 | Census   | 1-year age groups  | De jure            | Included                             |



**Appendix Table 5. List of all confirmed censuses by location and year**

| Location   | Year | Type     | Age detail         | Enumeration method | Included or excluded from estimation |
|------------|------|----------|--------------------|--------------------|--------------------------------------|
| Kyrgyzstan | 1999 | Census   | 1-year age groups  | De jure            | Included                             |
| Kyrgyzstan | 2009 | Census   | 1-year age groups  | De jure            | Included                             |
| Laos       | 1985 | Census   | 5-year age groups  | De jure            | Included                             |
| Laos       | 1995 | Census   | 5-year age groups  | De facto           | Included                             |
| Laos       | 2005 | Census   | 1-year age groups  | De jure            | Included                             |
| Laos       | 2015 | Census   | 1-year age groups  | De jure            | Included                             |
| Latvia     | 1959 | Census   | non-std age groups | De facto           | Included                             |
| Latvia     | 1970 | Census   | non-std age groups | De facto           | Included                             |
| Latvia     | 1979 | Census   | 5-year age groups  | De jure            | Included                             |
| Latvia     | 1989 | Census   | 5-year age groups  | De jure            | Included                             |
| Latvia     | 2000 | Census   | 5-year age groups  | De jure            | Included                             |
| Latvia     | 2006 | Registry | 1-year age groups  | NA                 | Included                             |
| Latvia     | 2007 | Registry | 1-year age groups  | NA                 | Included                             |
| Latvia     | 2008 | Registry | 1-year age groups  | NA                 | Included                             |
| Latvia     | 2009 | Registry | 1-year age groups  | NA                 | Included                             |
| Latvia     | 2010 | Registry | 1-year age groups  | NA                 | Included                             |
| Latvia     | 2011 | Census   | 1-year age groups  | De jure            | Included                             |
| Latvia     | 2011 | Registry | 1-year age groups  | NA                 | Included                             |
| Latvia     | 2012 | Registry | 1-year age groups  | NA                 | Included                             |
| Latvia     | 2013 | Registry | 1-year age groups  | NA                 | Included                             |
| Latvia     | 2014 | Registry | 1-year age groups  | NA                 | Included                             |
| Latvia     | 2015 | Registry | 1-year age groups  | NA                 | Included                             |
| Latvia     | 2016 | Registry | 1-year age groups  | NA                 | Included                             |
| Latvia     | 2017 | Registry | 1-year age groups  | NA                 | Included                             |
| Lebanon    | 1970 | Survey   | 5-year age groups  | NA                 | Included                             |
| Lesotho    | 1956 | Census   | non-std age groups | De facto           | Included                             |
| Lesotho    | 1966 | Census   | 1-year age groups  | De facto           | Included                             |
| Lesotho    | 1976 | Census   | 5-year age groups  | De jure            | Included                             |
| Lesotho    | 1986 | Census   | 5-year age groups  | De jure            | Included                             |
| Lesotho    | 1996 | Census   | 5-year age groups  | De jure            | Included                             |
| Lesotho    | 2006 | Census   | 1-year age groups  | De jure            | Included                             |
| Lesotho    | 2016 | Census   | Not Available      | Unknown            | Excluded                             |
| Liberia    | 1962 | Census   | 5-year age groups  | De facto           | Included                             |
| Liberia    | 1974 | Census   | 5-year age groups  | De facto           | Included                             |
| Liberia    | 1984 | Census   | 1-year age groups  | De facto           | Included                             |
| Liberia    | 2008 | Census   | 1-year age groups  | De facto           | Included                             |
| Libya      | 1954 | Census   | 5-year age groups  | De facto           | Included                             |
| Libya      | 1964 | Census   | non-std age groups | De facto           | Included                             |
| Libya      | 1973 | Census   | 1-year age groups  | De jure            | Included                             |
| Libya      | 1984 | Census   | 1-year age groups  | De facto           | Included                             |
| Libya      | 1995 | Census   | all ages only      | Unknown            | Included                             |
| Libya      | 2006 | Census   | 5-year age groups  | De facto           | Included                             |
| Lithuania  | 1959 | Census   | non-std age groups | De facto           | Included                             |
| Lithuania  | 1970 | Census   | non-std age groups | De facto           | Included                             |
| Lithuania  | 1979 | Census   | 5-year age groups  | De facto           | Included                             |
| Lithuania  | 1989 | Census   | 1-year age groups  | De jure            | Included                             |
| Lithuania  | 2001 | Census   | 5-year age groups  | De jure            | Included                             |
| Lithuania  | 2011 | Census   | 1-year age groups  | De jure            | Included                             |
| Lithuania  | 2015 | Registry | 1-year age groups  | NA                 | Included                             |
| Lithuania  | 2016 | Registry | 1-year age groups  | NA                 | Included                             |
| Lithuania  | 2017 | Registry | 1-year age groups  | NA                 | Included                             |
| Luxembourg | 1960 | Census   | 1-year age groups  | De jure            | Included                             |
| Luxembourg | 1966 | Census   | 5-year age groups  | De jure            | Included                             |
| Luxembourg | 1970 | Census   | 1-year age groups  | De jure            | Included                             |
| Luxembourg | 1981 | Census   | 1-year age groups  | De jure            | Included                             |
| Luxembourg | 1991 | Census   | 5-year age groups  | De jure            | Included                             |
| Luxembourg | 2001 | Census   | 1-year age groups  | De jure            | Included                             |
| Luxembourg | 2001 | Registry | 5-year age groups  | NA                 | Included                             |
| Luxembourg | 2002 | Registry | 5-year age groups  | NA                 | Included                             |
| Luxembourg | 2003 | Registry | 5-year age groups  | NA                 | Included                             |
| Luxembourg | 2004 | Registry | 5-year age groups  | NA                 | Included                             |
| Luxembourg | 2005 | Registry | 5-year age groups  | NA                 | Included                             |
| Luxembourg | 2006 | Registry | 5-year age groups  | NA                 | Included                             |
| Luxembourg | 2007 | Registry | 5-year age groups  | NA                 | Included                             |
| Luxembourg | 2008 | Registry | 5-year age groups  | NA                 | Included                             |
| Luxembourg | 2009 | Registry | 5-year age groups  | NA                 | Included                             |
| Luxembourg | 2010 | Registry | 5-year age groups  | NA                 | Included                             |
| Luxembourg | 2011 | Census   | 1-year age groups  | De jure            | Included                             |
| Luxembourg | 2011 | Registry | 5-year age groups  | NA                 | Included                             |
| Luxembourg | 2012 | Registry | 5-year age groups  | NA                 | Included                             |
| Luxembourg | 2013 | Registry | 5-year age groups  | NA                 | Included                             |
| Luxembourg | 2014 | Registry | 5-year age groups  | NA                 | Included                             |
| Luxembourg | 2015 | Registry | 5-year age groups  | NA                 | Included                             |
| Luxembourg | 2016 | Registry | 5-year age groups  | NA                 | Included                             |
| Luxembourg | 2017 | Registry | 5-year age groups  | NA                 | Included                             |

**Appendix Table 5. List of all confirmed censuses by location and year**

| Location                                     | Year | Type   | Age detail         | Enumeration method | Included or excluded from estimation |
|----------------------------------------------|------|--------|--------------------|--------------------|--------------------------------------|
| Macao Special Administrative Region of China | 1950 | Census | 5-year age groups  | De facto           | Included                             |
| Macao Special Administrative Region of China | 1960 | Census | 1-year age groups  | De facto           | Included                             |
| Macao Special Administrative Region of China | 1970 | Census | 5-year age groups  | De jure            | Included                             |
| Macao Special Administrative Region of China | 1981 | Census | 5-year age groups  | De jure            | Included                             |
| Macao Special Administrative Region of China | 1991 | Census | 1-year age groups  | De jure            | Included                             |
| Macao Special Administrative Region of China | 2001 | Census | 1-year age groups  | De jure            | Included                             |
| Macao Special Administrative Region of China | 2006 | Census | 5-year age groups  | De jure            | Included                             |
| Macao Special Administrative Region of China | 2011 | Census | 1-year age groups  | De jure            | Included                             |
| Macao Special Administrative Region of China | 2016 | Census | 5-year age groups  | De jure            | Included                             |
| Macedonia                                    | 1953 | Census | 5-year age groups  | De jure            | Included                             |
| Macedonia                                    | 1961 | Census | 5-year age groups  | De jure            | Included                             |
| Macedonia                                    | 1971 | Census | 5-year age groups  | De jure            | Included                             |
| Macedonia                                    | 1981 | Census | 5-year age groups  | De jure            | Included                             |
| Macedonia                                    | 1994 | Census | 5-year age groups  | De jure            | Included                             |
| Macedonia                                    | 2002 | Census | 1-year age groups  | De jure            | Included                             |
| Madagascar                                   | 1951 | Census | Not Available      | Unknown            | Excluded                             |
| Madagascar                                   | 1975 | Census | 5-year age groups  | De facto           | Included                             |
| Madagascar                                   | 1993 | Census | 5-year age groups  | De facto           | Included                             |
| Malawi                                       | 1956 | Census | Not Available      | Unknown            | Excluded                             |
| Malawi                                       | 1961 | Census | Not Available      | Unknown            | Excluded                             |
| Malawi                                       | 1966 | Census | 5-year age groups  | De facto           | Included                             |
| Malawi                                       | 1977 | Census | 5-year age groups  | De facto           | Included                             |
| Malawi                                       | 1987 | Census | 1-year age groups  | De facto           | Included                             |
| Malawi                                       | 1998 | Census | 1-year age groups  | De facto           | Included                             |
| Malawi                                       | 2008 | Census | 1-year age groups  | De facto           | Included                             |
| Malaysia                                     | 1991 | Census | 1-year age groups  | De facto           | Included                             |
| Malaysia                                     | 2000 | Census | 5-year age groups  | De jure            | Included                             |
| Malaysia                                     | 2010 | Census | 1-year age groups  | De jure            | Included                             |
| Malaysia (Peninsular Malaya)                 | 1957 | Census | 5-year age groups  | De facto           | Included                             |
| Malaysia (Peninsular Malaya)                 | 1970 | Census | 5-year age groups  | De facto           | Included                             |
| Malaysia (Peninsular Malaya)                 | 1980 | Census | 5-year age groups  | De facto           | Included                             |
| Malaysia (Sabah)                             | 1960 | Census | all ages only      | De facto           | Included                             |
| Malaysia (Sabah)                             | 1970 | Census | all ages only      | De facto           | Included                             |
| Malaysia (Sabah)                             | 1980 | Census | all ages only      | De facto           | Included                             |
| Malaysia (Sarawak)                           | 1960 | Census | all ages only      | De facto           | Included                             |
| Malaysia (Sarawak)                           | 1970 | Census | all ages only      | De facto           | Included                             |
| Malaysia (Sarawak)                           | 1980 | Census | all ages only      | De facto           | Included                             |
| Maldives                                     | 1953 | Census | all ages only      | De jure            | Included                             |
| Maldives                                     | 1957 | Census | all ages only      | De jure            | Included                             |
| Maldives                                     | 1962 | Census | all ages only      | Unknown            | Included                             |
| Maldives                                     | 1965 | Census | non-std age groups | De facto           | Excluded                             |
| Maldives                                     | 1967 | Census | 1-year age groups  | De facto           | Included                             |
| Maldives                                     | 1972 | Census | all ages only      | De jure            | Included                             |
| Maldives                                     | 1974 | Census | 5-year age groups  | De facto           | Included                             |
| Maldives                                     | 1977 | Census | 5-year age groups  | De facto           | Included                             |
| Maldives                                     | 1985 | Census | 1-year age groups  | De facto           | Included                             |
| Maldives                                     | 1990 | Census | 1-year age groups  | De facto           | Included                             |
| Maldives                                     | 1995 | Census | 1-year age groups  | De facto           | Included                             |
| Maldives                                     | 2000 | Census | 1-year age groups  | De facto           | Included                             |
| Maldives                                     | 2006 | Census | 1-year age groups  | De facto           | Included                             |
| Maldives                                     | 2014 | Census | 1-year age groups  | De facto           | Included                             |
| Mali                                         | 1951 | Census | Not Available      | Unknown            | Excluded                             |
| Mali                                         | 1976 | Census | 5-year age groups  | De facto           | Included                             |
| Mali                                         | 1987 | Census | 1-year age groups  | De jure            | Included                             |
| Mali                                         | 1998 | Census | 5-year age groups  | De jure            | Included                             |
| Mali                                         | 2009 | Census | 1-year age groups  | De facto           | Included                             |
| Malta                                        | 1957 | Census | 5-year age groups  | De facto           | Included                             |
| Malta                                        | 1967 | Census | 5-year age groups  | De facto           | Included                             |
| Malta                                        | 1985 | Census | 5-year age groups  | De facto           | Included                             |
| Malta                                        | 1995 | Census | 1-year age groups  | De jure            | Included                             |
| Malta                                        | 2005 | Census | 1-year age groups  | De jure            | Included                             |
| Malta                                        | 2011 | Census | 1-year age groups  | De facto           | Included                             |
| Marshall Islands                             | 1973 | Census | 5-year age groups  | De facto           | Excluded                             |
| Marshall Islands                             | 1980 | Census | non-std age groups | De jure            | Excluded                             |
| Marshall Islands                             | 1988 | Census | 1-year age groups  | De facto           | Included                             |
| Marshall Islands                             | 1999 | Census | 1-year age groups  | De facto           | Included                             |
| Marshall Islands                             | 2011 | Census | all ages only      | De jure            | Included                             |
| Mauritania                                   | 1951 | Census | Not Available      | Unknown            | Excluded                             |
| Mauritania                                   | 1977 | Census | 5-year age groups  | De facto           | Included                             |
| Mauritania                                   | 1988 | Census | 5-year age groups  | De facto           | Included                             |
| Mauritania                                   | 2000 | Census | 5-year age groups  | De facto           | Included                             |
| Mauritania                                   | 2013 | Census | 5-year age groups  | De jure            | Included                             |
| Mauritius                                    | 1952 | Census | 1-year age groups  | De facto           | Included                             |
| Mauritius                                    | 1962 | Census | 1-year age groups  | De facto           | Included                             |
| Mauritius                                    | 1972 | Census | 1-year age groups  | De facto           | Included                             |

**Appendix Table 5. List of all confirmed censuses by location and year**

| Location    | Year | Type     | Age detail         | Enumeration method | Included or excluded from estimation |
|-------------|------|----------|--------------------|--------------------|--------------------------------------|
| Mauritius   | 1983 | Census   | all ages only      | De facto           | Included                             |
| Mauritius   | 1990 | Census   | 1-year age groups  | De facto           | Included                             |
| Mauritius   | 2000 | Census   | 1-year age groups  | De jure            | Included                             |
| Mauritius   | 2011 | Census   | 1-year age groups  | De jure            | Included                             |
| Mexico      | 1950 | Census   | non-std age groups | De jure            | Included                             |
| Mexico      | 1960 | Census   | 5-year age groups  | De jure            | Included                             |
| Mexico      | 1970 | Census   | 1-year age groups  | De jure            | Included                             |
| Mexico      | 1980 | Census   | 1-year age groups  | De jure            | Included                             |
| Mexico      | 1990 | Census   | 1-year age groups  | De jure            | Included                             |
| Mexico      | 1995 | Census   | 5-year age groups  | Unknown            | Included                             |
| Mexico      | 2000 | Census   | 1-year age groups  | De jure            | Included                             |
| Mexico      | 2005 | Census   | 1-year age groups  | De jure            | Excluded                             |
| Mexico      | 2010 | Census   | 1-year age groups  | De facto           | Included                             |
| Moldova     | 1959 | Census   | non-std age groups | De facto           | Included                             |
| Moldova     | 1970 | Census   | non-std age groups | De facto           | Included                             |
| Moldova     | 1979 | Census   | 5-year age groups  | De facto           | Included                             |
| Moldova     | 1989 | Census   | 1-year age groups  | De jure            | Included                             |
| Mongolia    | 1956 | Census   | non-std age groups | De facto           | Included                             |
| Mongolia    | 1963 | Census   | 5-year age groups  | De jure            | Included                             |
| Mongolia    | 1969 | Census   | 5-year age groups  | De facto           | Included                             |
| Mongolia    | 1979 | Census   | 5-year age groups  | De facto           | Included                             |
| Mongolia    | 1989 | Census   | 5-year age groups  | De facto           | Included                             |
| Mongolia    | 2000 | Census   | 1-year age groups  | De facto           | Included                             |
| Mongolia    | 2010 | Census   | 5-year age groups  | De facto           | Included                             |
| Montenegro  | 1953 | Census   | 5-year age groups  | De jure            | Included                             |
| Montenegro  | 1961 | Census   | 5-year age groups  | De jure            | Included                             |
| Montenegro  | 1971 | Census   | 5-year age groups  | De jure            | Included                             |
| Montenegro  | 1981 | Census   | 5-year age groups  | De jure            | Included                             |
| Montenegro  | 1991 | Census   | 5-year age groups  | De facto           | Included                             |
| Montenegro  | 2003 | Census   | 1-year age groups  | De jure            | Included                             |
| Montenegro  | 2011 | Census   | 1-year age groups  | De jure            | Included                             |
| Morocco     | 1950 | Census   | all ages only      | De jure            | Excluded                             |
| Morocco     | 1960 | Census   | 5-year age groups  | De jure            | Included                             |
| Morocco     | 1971 | Census   | 1-year age groups  | De jure            | Included                             |
| Morocco     | 1982 | Census   | 5-year age groups  | De facto           | Included                             |
| Morocco     | 1994 | Census   | 5-year age groups  | De facto           | Included                             |
| Morocco     | 2004 | Census   | 1-year age groups  | De facto           | Included                             |
| Morocco     | 2014 | Census   | 5-year age groups  | De jure            | Included                             |
| Mozambique  | 1950 | Census   | 5-year age groups  | De facto           | Included                             |
| Mozambique  | 1960 | Census   | 5-year age groups  | De jure            | Included                             |
| Mozambique  | 1970 | Census   | 5-year age groups  | De facto           | Included                             |
| Mozambique  | 1980 | Census   | 1-year age groups  | De facto           | Included                             |
| Mozambique  | 1997 | Census   | 1-year age groups  | De jure            | Included                             |
| Mozambique  | 2007 | Census   | 1-year age groups  | De facto           | Included                             |
| Mozambique  | 2017 | Census   | all ages only      | Unknown            | Included                             |
| Myanmar     | 1973 | Census   | 5-year age groups  | De jure            | Included                             |
| Myanmar     | 1983 | Census   | 1-year age groups  | De facto           | Included                             |
| Myanmar     | 2014 | Census   | 1-year age groups  | De facto           | Included                             |
| Namibia     | 1951 | Census   | 5-year age groups  | De facto           | Excluded                             |
| Namibia     | 1960 | Census   | 5-year age groups  | De facto           | Included                             |
| Namibia     | 1961 | Census   | Not Available      | Unknown            | Excluded                             |
| Namibia     | 1970 | Census   | all ages only      | De jure            | Included                             |
| Namibia     | 1971 | Census   | Not Available      | Unknown            | Excluded                             |
| Namibia     | 1981 | Census   | Not Available      | Unknown            | Excluded                             |
| Namibia     | 1991 | Census   | 1-year age groups  | De facto           | Included                             |
| Namibia     | 2001 | Census   | 1-year age groups  | De facto           | Included                             |
| Namibia     | 2011 | Census   | 1-year age groups  | De facto           | Included                             |
| Nepal       | 1954 | Census   | 5-year age groups  | De facto           | Included                             |
| Nepal       | 1961 | Census   | 5-year age groups  | De facto           | Included                             |
| Nepal       | 1971 | Census   | non-std age groups | De jure            | Included                             |
| Nepal       | 1981 | Census   | 1-year age groups  | De jure            | Included                             |
| Nepal       | 1991 | Census   | 1-year age groups  | De jure            | Included                             |
| Nepal       | 2001 | Census   | 1-year age groups  | De jure            | Included                             |
| Nepal       | 2011 | Census   | 1-year age groups  | De jure            | Included                             |
| Netherlands | 1950 | Registry | 1-year age groups  | NA                 | Included                             |
| Netherlands | 1951 | Registry | 1-year age groups  | NA                 | Included                             |
| Netherlands | 1952 | Registry | 1-year age groups  | NA                 | Included                             |
| Netherlands | 1953 | Registry | 1-year age groups  | NA                 | Included                             |
| Netherlands | 1954 | Registry | 1-year age groups  | NA                 | Included                             |
| Netherlands | 1955 | Registry | 1-year age groups  | NA                 | Included                             |
| Netherlands | 1956 | Registry | 1-year age groups  | NA                 | Included                             |
| Netherlands | 1957 | Registry | 1-year age groups  | NA                 | Included                             |
| Netherlands | 1958 | Registry | 1-year age groups  | NA                 | Included                             |
| Netherlands | 1959 | Registry | 1-year age groups  | NA                 | Included                             |
| Netherlands | 1960 | Census   | 1-year age groups  | De jure            | Included                             |

**Appendix Table 5. List of all confirmed censuses by location and year**

| Location    | Year | Type     | Age detail        | Enumeration method | Included or excluded from estimation |
|-------------|------|----------|-------------------|--------------------|--------------------------------------|
| Netherlands | 1960 | Registry | 1-year age groups | NA                 | Included                             |
| Netherlands | 1961 | Registry | 1-year age groups | NA                 | Included                             |
| Netherlands | 1962 | Registry | 1-year age groups | NA                 | Included                             |
| Netherlands | 1963 | Registry | 1-year age groups | NA                 | Included                             |
| Netherlands | 1964 | Registry | 1-year age groups | NA                 | Included                             |
| Netherlands | 1965 | Registry | 1-year age groups | NA                 | Included                             |
| Netherlands | 1966 | Registry | 1-year age groups | NA                 | Included                             |
| Netherlands | 1967 | Registry | 1-year age groups | NA                 | Included                             |
| Netherlands | 1968 | Registry | 1-year age groups | NA                 | Included                             |
| Netherlands | 1969 | Registry | 1-year age groups | NA                 | Included                             |
| Netherlands | 1970 | Registry | 1-year age groups | NA                 | Included                             |
| Netherlands | 1971 | Census   | Not Available     | Unknown            | Excluded                             |
| Netherlands | 1971 | Registry | 1-year age groups | NA                 | Included                             |
| Netherlands | 1972 | Registry | 1-year age groups | NA                 | Included                             |
| Netherlands | 1973 | Registry | 1-year age groups | NA                 | Included                             |
| Netherlands | 1974 | Registry | 1-year age groups | NA                 | Included                             |
| Netherlands | 1975 | Registry | 1-year age groups | NA                 | Included                             |
| Netherlands | 1976 | Registry | 1-year age groups | NA                 | Included                             |
| Netherlands | 1977 | Registry | 1-year age groups | NA                 | Included                             |
| Netherlands | 1978 | Registry | 1-year age groups | NA                 | Included                             |
| Netherlands | 1979 | Registry | 1-year age groups | NA                 | Included                             |
| Netherlands | 1980 | Census   | Not Available     | Unknown            | Excluded                             |
| Netherlands | 1980 | Registry | 1-year age groups | NA                 | Included                             |
| Netherlands | 1981 | Registry | 1-year age groups | NA                 | Included                             |
| Netherlands | 1982 | Registry | 1-year age groups | NA                 | Included                             |
| Netherlands | 1983 | Registry | 1-year age groups | NA                 | Included                             |
| Netherlands | 1984 | Registry | 1-year age groups | NA                 | Included                             |
| Netherlands | 1985 | Registry | 1-year age groups | NA                 | Included                             |
| Netherlands | 1986 | Registry | 1-year age groups | NA                 | Included                             |
| Netherlands | 1987 | Registry | 1-year age groups | NA                 | Included                             |
| Netherlands | 1988 | Registry | 1-year age groups | NA                 | Included                             |
| Netherlands | 1989 | Registry | 1-year age groups | NA                 | Included                             |
| Netherlands | 1990 | Registry | 1-year age groups | NA                 | Included                             |
| Netherlands | 1991 | Census   | 5-year age groups | De jure            | Included                             |
| Netherlands | 1991 | Registry | 1-year age groups | NA                 | Included                             |
| Netherlands | 1992 | Registry | 1-year age groups | NA                 | Included                             |
| Netherlands | 1993 | Registry | 1-year age groups | NA                 | Included                             |
| Netherlands | 1994 | Registry | 1-year age groups | NA                 | Included                             |
| Netherlands | 1995 | Registry | 1-year age groups | NA                 | Included                             |
| Netherlands | 1996 | Registry | 1-year age groups | NA                 | Included                             |
| Netherlands | 1997 | Registry | 1-year age groups | NA                 | Included                             |
| Netherlands | 1998 | Registry | 1-year age groups | NA                 | Included                             |
| Netherlands | 1999 | Registry | 1-year age groups | NA                 | Included                             |
| Netherlands | 2000 | Registry | 1-year age groups | NA                 | Included                             |
| Netherlands | 2001 | Census   | Not Available     | Unknown            | Included                             |
| Netherlands | 2001 | Registry | 1-year age groups | NA                 | Included                             |
| Netherlands | 2002 | Census   | 1-year age groups | De jure            | Included                             |
| Netherlands | 2002 | Registry | 1-year age groups | NA                 | Included                             |
| Netherlands | 2003 | Registry | 1-year age groups | NA                 | Included                             |
| Netherlands | 2004 | Registry | 1-year age groups | NA                 | Included                             |
| Netherlands | 2005 | Registry | 1-year age groups | NA                 | Included                             |
| Netherlands | 2006 | Registry | 1-year age groups | NA                 | Included                             |
| Netherlands | 2007 | Registry | 1-year age groups | NA                 | Included                             |
| Netherlands | 2008 | Registry | 1-year age groups | NA                 | Included                             |
| Netherlands | 2009 | Registry | 1-year age groups | NA                 | Included                             |
| Netherlands | 2010 | Registry | 1-year age groups | NA                 | Included                             |
| Netherlands | 2011 | Census   | 1-year age groups | De jure            | Included                             |
| Netherlands | 2011 | Registry | 1-year age groups | NA                 | Included                             |
| Netherlands | 2012 | Registry | 1-year age groups | NA                 | Included                             |
| Netherlands | 2013 | Registry | 1-year age groups | NA                 | Included                             |
| Netherlands | 2014 | Registry | 1-year age groups | NA                 | Included                             |
| Netherlands | 2015 | Registry | 1-year age groups | NA                 | Included                             |
| Netherlands | 2016 | Registry | 1-year age groups | NA                 | Included                             |
| Netherlands | 2017 | Registry | 1-year age groups | NA                 | Included                             |
| New Zealand | 1951 | Census   | 1-year age groups | De facto           | Included                             |
| New Zealand | 1956 | Census   | 5-year age groups | De jure            | Included                             |
| New Zealand | 1961 | Census   | 1-year age groups | De jure            | Included                             |
| New Zealand | 1966 | Census   | 5-year age groups | De facto           | Included                             |
| New Zealand | 1971 | Census   | 5-year age groups | De facto           | Included                             |
| New Zealand | 1976 | Census   | 5-year age groups | De facto           | Included                             |
| New Zealand | 1981 | Census   | 1-year age groups | De jure            | Included                             |
| New Zealand | 1986 | Census   | 1-year age groups | De jure            | Included                             |
| New Zealand | 1991 | Census   | 1-year age groups | De facto           | Included                             |
| New Zealand | 1996 | Census   | 1-year age groups | De jure            | Included                             |
| New Zealand | 2001 | Census   | 5-year age groups | De jure            | Included                             |



**Appendix Table 5. List of all confirmed censuses by location and year**

| Location                 | Year | Type     | Age detail         | Enumeration method | Included or excluded from estimation |
|--------------------------|------|----------|--------------------|--------------------|--------------------------------------|
| New Zealand              | 2006 | Census   | 1-year age groups  | De jure            | Included                             |
| New Zealand              | 2013 | Census   | 1-year age groups  | De jure            | Included                             |
| New Zealand              | 2018 | Census   | Not Available      | Unknown            | Excluded                             |
| Nicaragua                | 1950 | Census   | 1-year age groups  | De jure            | Included                             |
| Nicaragua                | 1963 | Census   | 1-year age groups  | De jure            | Included                             |
| Nicaragua                | 1971 | Census   | 1-year age groups  | De jure            | Included                             |
| Nicaragua                | 1995 | Census   | 1-year age groups  | Unknown            | Included                             |
| Nicaragua                | 2005 | Census   | 1-year age groups  | De jure            | Included                             |
| Niger                    | 1951 | Census   | Not Available      | Unknown            | Excluded                             |
| Niger                    | 1977 | Census   | 5-year age groups  | De jure            | Included                             |
| Niger                    | 1988 | Census   | 5-year age groups  | De facto           | Included                             |
| Niger                    | 2001 | Census   | 1-year age groups  | De jure            | Included                             |
| Niger                    | 2012 | Census   | 1-year age groups  | De jure            | Included                             |
| Nigeria                  | 1953 | Census   | non-std age groups | De facto           | Excluded                             |
| Nigeria                  | 1963 | Census   | 1-year age groups  | De facto           | Excluded                             |
| Nigeria                  | 1973 | Census   | Not Available      | Unknown            | Excluded                             |
| Nigeria                  | 1991 | Census   | 1-year age groups  | De facto           | Included                             |
| Nigeria                  | 2006 | Census   | 5-year age groups  | De facto           | Included                             |
| Nigeria                  | 2014 | Census   | 5-year age groups  | Micro-census       | Included                             |
| North Korea              | 1965 | Census   | Not Available      | Unknown            | Excluded                             |
| North Korea              | 1967 | Census   | Not Available      | Unknown            | Excluded                             |
| North Korea              | 1968 | Census   | Not Available      | Unknown            | Excluded                             |
| North Korea              | 1993 | Census   | 1-year age groups  | De jure            | Included                             |
| North Korea              | 2008 | Census   | 1-year age groups  | De jure            | Included                             |
| Northern Ireland         | 1951 | Census   | 1-year age groups  | Unknown            | Included                             |
| Northern Ireland         | 1961 | Census   | 1-year age groups  | Unknown            | Included                             |
| Northern Ireland         | 1966 | Census   | 1-year age groups  | Unknown            | Included                             |
| Northern Ireland         | 1971 | Census   | 1-year age groups  | Unknown            | Included                             |
| Northern Ireland         | 1981 | Census   | 1-year age groups  | Unknown            | Included                             |
| Northern Ireland         | 1991 | Census   | 1-year age groups  | De jure            | Included                             |
| Northern Ireland         | 2001 | Census   | 1-year age groups  | De jure            | Included                             |
| Northern Ireland         | 2011 | Census   | 1-year age groups  | De jure            | Included                             |
| Northern Mariana Islands | 1958 | Census   | 5-year age groups  | De jure            | Excluded                             |
| Northern Mariana Islands | 1970 | Census   | non-std age groups | De jure            | Included                             |
| Northern Mariana Islands | 1973 | Census   | 1-year age groups  | De facto           | Excluded                             |
| Northern Mariana Islands | 1980 | Census   | 5-year age groups  | De facto           | Included                             |
| Northern Mariana Islands | 1990 | Census   | non-std age groups | De facto           | Included                             |
| Northern Mariana Islands | 1995 | Census   | 5-year age groups  | De facto           | Included                             |
| Northern Mariana Islands | 2000 | Census   | non-std age groups | De jure            | Included                             |
| Northern Mariana Islands | 2010 | Census   | 5-year age groups  | De facto           | Included                             |
| Norway                   | 1950 | Census   | 1-year age groups  | De jure            | Included                             |
| Norway                   | 1960 | Census   | 1-year age groups  | De jure            | Included                             |
| Norway                   | 1970 | Census   | 1-year age groups  | De jure            | Included                             |
| Norway                   | 1980 | Census   | 1-year age groups  | De jure            | Included                             |
| Norway                   | 1986 | Registry | 1-year age groups  | NA                 | Included                             |
| Norway                   | 1987 | Registry | 1-year age groups  | NA                 | Included                             |
| Norway                   | 1988 | Registry | 1-year age groups  | NA                 | Included                             |
| Norway                   | 1989 | Registry | 1-year age groups  | NA                 | Included                             |
| Norway                   | 1990 | Census   | 1-year age groups  | De jure            | Included                             |
| Norway                   | 1990 | Registry | 1-year age groups  | NA                 | Included                             |
| Norway                   | 1991 | Registry | 1-year age groups  | NA                 | Included                             |
| Norway                   | 1992 | Registry | 1-year age groups  | NA                 | Included                             |
| Norway                   | 1993 | Registry | 1-year age groups  | NA                 | Included                             |
| Norway                   | 1994 | Registry | 1-year age groups  | NA                 | Included                             |
| Norway                   | 1995 | Registry | 1-year age groups  | NA                 | Included                             |
| Norway                   | 1996 | Registry | 1-year age groups  | NA                 | Included                             |
| Norway                   | 1997 | Registry | 1-year age groups  | NA                 | Included                             |
| Norway                   | 1998 | Registry | 1-year age groups  | NA                 | Included                             |
| Norway                   | 1999 | Registry | 1-year age groups  | NA                 | Included                             |
| Norway                   | 2000 | Registry | 1-year age groups  | NA                 | Included                             |
| Norway                   | 2001 | Census   | 1-year age groups  | De jure            | Included                             |
| Norway                   | 2001 | Registry | 1-year age groups  | NA                 | Included                             |
| Norway                   | 2002 | Registry | 1-year age groups  | NA                 | Included                             |
| Norway                   | 2003 | Registry | 1-year age groups  | NA                 | Included                             |
| Norway                   | 2004 | Registry | 1-year age groups  | NA                 | Included                             |
| Norway                   | 2005 | Registry | 1-year age groups  | NA                 | Included                             |
| Norway                   | 2006 | Registry | 1-year age groups  | NA                 | Included                             |
| Norway                   | 2007 | Registry | 1-year age groups  | NA                 | Included                             |
| Norway                   | 2008 | Registry | 1-year age groups  | NA                 | Included                             |
| Norway                   | 2009 | Registry | 1-year age groups  | NA                 | Included                             |
| Norway                   | 2010 | Registry | 1-year age groups  | NA                 | Included                             |
| Norway                   | 2011 | Census   | 1-year age groups  | De jure            | Included                             |
| Norway                   | 2011 | Registry | 1-year age groups  | NA                 | Included                             |
| Norway                   | 2012 | Registry | 1-year age groups  | NA                 | Included                             |
| Norway                   | 2013 | Registry | 1-year age groups  | NA                 | Included                             |

**Appendix Table 5. List of all confirmed censuses by location and year**

| Location         | Year | Type     | Age detail         | Enumeration method | Included or excluded from estimation |
|------------------|------|----------|--------------------|--------------------|--------------------------------------|
| Norway           | 2014 | Registry | 1-year age groups  | NA                 | Included                             |
| Norway           | 2015 | Registry | 1-year age groups  | NA                 | Included                             |
| Norway           | 2016 | Registry | 1-year age groups  | NA                 | Included                             |
| Norway           | 2017 | Registry | 1-year age groups  | NA                 | Included                             |
| Oman             | 1993 | Census   | 5-year age groups  | De facto           | Included                             |
| Oman             | 2003 | Census   | 1-year age groups  | De facto           | Included                             |
| Oman             | 2010 | Census   | 5-year age groups  | De facto           | Included                             |
| Oman             | 2012 | Registry | 5-year age groups  | NA                 | Included                             |
| Oman             | 2013 | Registry | 5-year age groups  | NA                 | Included                             |
| Oman             | 2014 | Registry | 5-year age groups  | NA                 | Included                             |
| Oman             | 2015 | Registry | 5-year age groups  | NA                 | Included                             |
| Oman             | 2016 | Registry | 5-year age groups  | NA                 | Included                             |
| Oman             | 2017 | Registry | 5-year age groups  | NA                 | Included                             |
| Pakistan         | 1951 | Census   | non-std age groups | De jure            | Included                             |
| Pakistan         | 1961 | Census   | non-std age groups | De jure            | Included                             |
| Pakistan         | 1972 | Census   | 1-year age groups  | De jure            | Included                             |
| Pakistan         | 1981 | Census   | 1-year age groups  | De facto           | Included                             |
| Pakistan         | 1998 | Census   | 5-year age groups  | De facto           | Included                             |
| Pakistan         | 2017 | Census   | all ages only      | Unknown            | Included                             |
| Palestine        | 1967 | Census   | 5-year age groups  | De jure            | Included                             |
| Palestine        | 1997 | Census   | 1-year age groups  | De facto           | Included                             |
| Palestine        | 2007 | Census   | 1-year age groups  | De facto           | Included                             |
| Palestine        | 2017 | Census   | all ages only      | Unknown            | Included                             |
| Panama           | 1950 | Census   | 1-year age groups  | De facto           | Included                             |
| Panama           | 1960 | Census   | 1-year age groups  | De facto           | Included                             |
| Panama           | 1970 | Census   | 5-year age groups  | De facto           | Included                             |
| Panama           | 1980 | Census   | 1-year age groups  | De facto           | Included                             |
| Panama           | 1990 | Census   | 1-year age groups  | De facto           | Included                             |
| Panama           | 2000 | Census   | 1-year age groups  | De facto           | Included                             |
| Panama           | 2010 | Census   | 5-year age groups  | De facto           | Included                             |
| Papua New Guinea | 1954 | Census   | Not Available      | Unknown            | Excluded                             |
| Papua New Guinea | 1961 | Census   | Not Available      | Unknown            | Excluded                             |
| Papua New Guinea | 1966 | Census   | 5-year age groups  | De facto           | Included                             |
| Papua New Guinea | 1971 | Census   | 1-year age groups  | De facto           | Included                             |
| Papua New Guinea | 1980 | Census   | 1-year age groups  | De facto           | Included                             |
| Papua New Guinea | 1990 | Census   | 5-year age groups  | De facto           | Excluded                             |
| Papua New Guinea | 2000 | Census   | 1-year age groups  | De facto           | Included                             |
| Papua New Guinea | 2011 | Census   | 5-year age groups  | De facto           | Included                             |
| Paraguay         | 1950 | Census   | non-std age groups | De facto           | Included                             |
| Paraguay         | 1962 | Census   | 1-year age groups  | De facto           | Included                             |
| Paraguay         | 1972 | Census   | 1-year age groups  | De facto           | Included                             |
| Paraguay         | 1982 | Census   | 1-year age groups  | De facto           | Included                             |
| Paraguay         | 1992 | Census   | 1-year age groups  | De facto           | Included                             |
| Paraguay         | 2002 | Census   | 1-year age groups  | De facto           | Included                             |
| Peru             | 1961 | Census   | 1-year age groups  | De facto           | Included                             |
| Peru             | 1972 | Census   | 1-year age groups  | De facto           | Included                             |
| Peru             | 1981 | Census   | 1-year age groups  | De facto           | Included                             |
| Peru             | 1993 | Census   | 1-year age groups  | Unknown            | Included                             |
| Peru             | 2005 | Census   | 1-year age groups  | De facto           | Included                             |
| Peru             | 2007 | Census   | 1-year age groups  | De facto           | Included                             |
| Peru             | 2012 | Registry | all ages only      | NA                 | Included                             |
| Peru             | 2013 | Registry | all ages only      | NA                 | Included                             |
| Peru             | 2014 | Registry | all ages only      | NA                 | Included                             |
| Peru             | 2015 | Registry | all ages only      | NA                 | Included                             |
| Peru             | 2016 | Registry | all ages only      | NA                 | Included                             |
| Peru             | 2017 | Census   | Not Available      | Unknown            | Excluded                             |
| Peru             | 2017 | Registry | all ages only      | NA                 | Included                             |
| Philippines      | 1960 | Census   | 1-year age groups  | De jure            | Included                             |
| Philippines      | 1970 | Census   | 1-year age groups  | De jure            | Included                             |
| Philippines      | 1975 | Census   | 5-year age groups  | De jure            | Included                             |
| Philippines      | 1980 | Census   | 5-year age groups  | De jure            | Included                             |
| Philippines      | 1990 | Census   | 1-year age groups  | De jure            | Included                             |
| Philippines      | 1995 | Census   | 1-year age groups  | De jure            | Included                             |
| Philippines      | 2000 | Census   | 1-year age groups  | De jure            | Included                             |
| Philippines      | 2007 | Census   | 1-year age groups  | De jure            | Included                             |
| Philippines      | 2010 | Census   | 5-year age groups  | De jure            | Included                             |
| Philippines      | 2015 | Census   | 1-year age groups  | De jure            | Included                             |
| Poland           | 1950 | Census   | 5-year age groups  | De facto           | Included                             |
| Poland           | 1960 | Census   | 5-year age groups  | De facto           | Included                             |
| Poland           | 1970 | Census   | 1-year age groups  | De facto           | Included                             |
| Poland           | 1978 | Census   | 5-year age groups  | De facto           | Included                             |
| Poland           | 1988 | Census   | 1-year age groups  | De facto           | Included                             |
| Poland           | 2002 | Census   | 1-year age groups  | De jure            | Included                             |
| Poland           | 2006 | Registry | 1-year age groups  | NA                 | Included                             |
| Poland           | 2007 | Registry | 1-year age groups  | NA                 | Included                             |

**Appendix Table 5. List of all confirmed censuses by location and year**

| Location                          | Year | Type     | Age detail         | Enumeration method | Included or excluded from estimation |
|-----------------------------------|------|----------|--------------------|--------------------|--------------------------------------|
| Poland                            | 2008 | Registry | 1-year age groups  | NA                 | Included                             |
| Poland                            | 2009 | Registry | 1-year age groups  | NA                 | Included                             |
| Poland                            | 2010 | Registry | 1-year age groups  | NA                 | Included                             |
| Poland                            | 2011 | Census   | 1-year age groups  | De jure            | Included                             |
| Poland                            | 2011 | Registry | 1-year age groups  | NA                 | Included                             |
| Poland                            | 2012 | Registry | 1-year age groups  | NA                 | Included                             |
| Poland                            | 2013 | Registry | 1-year age groups  | NA                 | Included                             |
| Poland                            | 2014 | Registry | 1-year age groups  | NA                 | Included                             |
| Poland                            | 2015 | Registry | 1-year age groups  | NA                 | Included                             |
| Poland                            | 2016 | Registry | 1-year age groups  | NA                 | Included                             |
| Poland                            | 2017 | Registry | 1-year age groups  | NA                 | Included                             |
| Portugal                          | 1950 | Census   | 1-year age groups  | De facto           | Included                             |
| Portugal                          | 1960 | Census   | 5-year age groups  | De facto           | Included                             |
| Portugal                          | 1970 | Census   | 1-year age groups  | De facto           | Included                             |
| Portugal                          | 1981 | Census   | 1-year age groups  | De facto           | Included                             |
| Portugal                          | 1991 | Census   | 1-year age groups  | De facto           | Included                             |
| Portugal                          | 2001 | Census   | 5-year age groups  | De facto           | Included                             |
| Portugal                          | 2011 | Census   | 1-year age groups  | De jure            | Included                             |
| Pridnestrovian Moldavian Republic | 2004 | Census   | all ages only      | De jure            | Included                             |
| Pridnestrovian Moldavian Republic | 2015 | Census   | all ages only      | De jure            | Included                             |
| Puerto Rico                       | 1950 | Census   | non-std age groups | De jure            | Included                             |
| Puerto Rico                       | 1960 | Census   | non-std age groups | De jure            | Included                             |
| Puerto Rico                       | 1970 | Census   | 1-year age groups  | De jure            | Included                             |
| Puerto Rico                       | 1980 | Census   | 1-year age groups  | De jure            | Included                             |
| Puerto Rico                       | 1990 | Census   | 1-year age groups  | De jure            | Included                             |
| Puerto Rico                       | 2000 | Census   | 1-year age groups  | De jure            | Included                             |
| Puerto Rico                       | 2010 | Census   | 1-year age groups  | De jure            | Included                             |
| Qatar                             | 1986 | Census   | 1-year age groups  | De facto           | Included                             |
| Qatar                             | 1997 | Census   | 5-year age groups  | De facto           | Included                             |
| Qatar                             | 2004 | Census   | 5-year age groups  | De facto           | Included                             |
| Qatar                             | 2010 | Census   | 5-year age groups  | De facto           | Included                             |
| Qatar                             | 2015 | Census   | 5-year age groups  | De facto           | Included                             |
| Republic of Kosovo                | 1953 | Census   | 5-year age groups  | Unknown            | Included                             |
| Republic of Kosovo                | 1961 | Census   | 5-year age groups  | Unknown            | Included                             |
| Republic of Kosovo                | 1971 | Census   | 5-year age groups  | Unknown            | Included                             |
| Republic of Kosovo                | 1981 | Census   | 5-year age groups  | Unknown            | Included                             |
| Republic of Kosovo                | 1991 | Census   | 5-year age groups  | Unknown            | Included                             |
| Republic of Kosovo                | 2011 | Census   | 5-year age groups  | Unknown            | Included                             |
| Republic of Moldova               | 2004 | Census   | 1-year age groups  | De facto           | Included                             |
| Republic of Moldova               | 2014 | Census   | 1-year age groups  | De jure            | Included                             |
| Republic of Serbia                | 1971 | Census   | 1-year age groups  | De facto           | Included                             |
| Republic of Serbia                | 1991 | Census   | 5-year age groups  | De jure            | Included                             |
| Republic of Serbia                | 2002 | Census   | 1-year age groups  | De jure            | Included                             |
| Republic of Serbia                | 2011 | Census   | 1-year age groups  | De jure            | Included                             |
| Romania                           | 1956 | Census   | 5-year age groups  | De jure            | Included                             |
| Romania                           | 1966 | Census   | 1-year age groups  | De jure            | Included                             |
| Romania                           | 1977 | Census   | 5-year age groups  | De facto           | Included                             |
| Romania                           | 1992 | Census   | 1-year age groups  | De jure            | Included                             |
| Romania                           | 2002 | Census   | 1-year age groups  | De jure            | Included                             |
| Romania                           | 2011 | Census   | 1-year age groups  | De jure            | Included                             |
| Russian Federation                | 1959 | Census   | 1-year age groups  | Unknown            | Included                             |
| Russian Federation                | 1970 | Census   | 5-year age groups  | Unknown            | Included                             |
| Russian Federation                | 1979 | Census   | 1-year age groups  | Unknown            | Included                             |
| Russian Federation                | 1989 | Census   | 1-year age groups  | Unknown            | Included                             |
| Russian Federation                | 2002 | Census   | 5-year age groups  | De jure            | Included                             |
| Russian Federation                | 2010 | Census   | 1-year age groups  | De jure            | Included                             |
| Rwanda                            | 1953 | Census   | Not Available      | Unknown            | Excluded                             |
| Rwanda                            | 1978 | Census   | 5-year age groups  | De facto           | Included                             |
| Rwanda                            | 1991 | Census   | 5-year age groups  | De facto           | Included                             |
| Rwanda                            | 2002 | Census   | 1-year age groups  | De jure            | Included                             |
| Rwanda                            | 2012 | Census   | 1-year age groups  | De jure            | Included                             |
| Saint Lucia                       | 1960 | Census   | 5-year age groups  | De facto           | Included                             |
| Saint Lucia                       | 1970 | Census   | 5-year age groups  | De facto           | Included                             |
| Saint Lucia                       | 1980 | Census   | 1-year age groups  | De facto           | Included                             |
| Saint Lucia                       | 1991 | Census   | 1-year age groups  | De facto           | Included                             |
| Saint Lucia                       | 2001 | Census   | 1-year age groups  | De facto           | Included                             |
| Saint Lucia                       | 2010 | Census   | 5-year age groups  | De jure            | Included                             |
| Saint Vincent and the Grenadines  | 1960 | Census   | 5-year age groups  | De facto           | Included                             |
| Saint Vincent and the Grenadines  | 1970 | Census   | 5-year age groups  | De facto           | Included                             |
| Saint Vincent and the Grenadines  | 1980 | Census   | 1-year age groups  | De facto           | Included                             |
| Saint Vincent and the Grenadines  | 1991 | Census   | 1-year age groups  | De facto           | Included                             |
| Saint Vincent and the Grenadines  | 2001 | Census   | 1-year age groups  | De facto           | Included                             |
| Saint Vincent and the Grenadines  | 2012 | Census   | 5-year age groups  | De facto           | Included                             |
| Samoa                             | 1951 | Census   | 5-year age groups  | De facto           | Included                             |
| Samoa                             | 1956 | Census   | 1-year age groups  | De facto           | Included                             |

**Appendix Table 5. List of all confirmed censuses by location and year**

| Location                   | Year | Type     | Age detail         | Enumeration method | Included or excluded from estimation |
|----------------------------|------|----------|--------------------|--------------------|--------------------------------------|
| Samoa                      | 1961 | Census   | 5-year age groups  | De facto           | Included                             |
| Samoa                      | 1966 | Census   | 5-year age groups  | De facto           | Included                             |
| Samoa                      | 1971 | Census   | 1-year age groups  | De facto           | Included                             |
| Samoa                      | 1976 | Census   | 5-year age groups  | De facto           | Included                             |
| Samoa                      | 1981 | Census   | 5-year age groups  | De facto           | Included                             |
| Samoa                      | 1986 | Census   | 5-year age groups  | De facto           | Included                             |
| Samoa                      | 1991 | Census   | 5-year age groups  | De facto           | Included                             |
| Samoa                      | 2001 | Census   | 1-year age groups  | De facto           | Included                             |
| Samoa                      | 2006 | Census   | 5-year age groups  | De facto           | Included                             |
| Samoa                      | 2011 | Census   | 5-year age groups  | De facto           | Included                             |
| Samoa                      | 2016 | Census   | all ages only      | Unknown            | Included                             |
| Sao Tome and Principe      | 1950 | Census   | all ages only      | Unknown            | Included                             |
| Sao Tome and Principe      | 1960 | Census   | 5-year age groups  | De jure            | Included                             |
| Sao Tome and Principe      | 1970 | Census   | 5-year age groups  | De facto           | Included                             |
| Sao Tome and Principe      | 1981 | Census   | 1-year age groups  | De facto           | Included                             |
| Sao Tome and Principe      | 1991 | Census   | 1-year age groups  | De facto           | Included                             |
| Sao Tome and Principe      | 2001 | Census   | 5-year age groups  | De facto           | Included                             |
| Sao Tome and Principe      | 2012 | Census   | 1-year age groups  | De jure            | Included                             |
| Saudi Arabia               | 1962 | Census   | Not Available      | Unknown            | Excluded                             |
| Saudi Arabia               | 1974 | Census   | all ages only      | De facto           | Included                             |
| Saudi Arabia               | 1992 | Census   | 5-year age groups  | De facto           | Included                             |
| Saudi Arabia               | 2004 | Census   | 5-year age groups  | De facto           | Included                             |
| Saudi Arabia               | 2010 | Census   | 5-year age groups  | De facto           | Included                             |
| Scotland                   | 1951 | Census   | all ages only      | Unknown            | Included                             |
| Scotland                   | 1961 | Census   | 5-year age groups  | Unknown            | Included                             |
| Scotland                   | 1971 | Census   | 5-year age groups  | Unknown            | Included                             |
| Scotland                   | 1981 | Census   | 5-year age groups  | De jure            | Included                             |
| Scotland                   | 1991 | Census   | non-std age groups | De jure            | Included                             |
| Scotland                   | 2001 | Census   | 5-year age groups  | De jure            | Included                             |
| Scotland                   | 2011 | Census   | 1-year age groups  | De jure            | Included                             |
| Senegal                    | 1951 | Census   | Not Available      | Unknown            | Excluded                             |
| Senegal                    | 1976 | Census   | 5-year age groups  | De jure            | Included                             |
| Senegal                    | 1988 | Census   | 5-year age groups  | De jure            | Included                             |
| Senegal                    | 2002 | Census   | 5-year age groups  | De jure            | Included                             |
| Senegal                    | 2013 | Census   | 5-year age groups  | De facto           | Included                             |
| Seychelles                 | 1960 | Census   | 5-year age groups  | De facto           | Included                             |
| Seychelles                 | 1971 | Census   | 1-year age groups  | De jure            | Included                             |
| Seychelles                 | 1977 | Census   | 5-year age groups  | De facto           | Included                             |
| Seychelles                 | 1987 | Census   | 1-year age groups  | De facto           | Included                             |
| Seychelles                 | 1994 | Census   | non-std age groups | De facto           | Included                             |
| Seychelles                 | 1997 | Census   | 1-year age groups  | De facto           | Included                             |
| Seychelles                 | 2002 | Census   | 1-year age groups  | De jure            | Included                             |
| Seychelles                 | 2010 | Census   | 1-year age groups  | De facto           | Included                             |
| Sierra Leone               | 1963 | Census   | 5-year age groups  | De facto           | Included                             |
| Sierra Leone               | 1974 | Census   | 5-year age groups  | De facto           | Included                             |
| Sierra Leone               | 1985 | Census   | 5-year age groups  | De facto           | Included                             |
| Sierra Leone               | 2004 | Census   | 1-year age groups  | Unknown            | Included                             |
| Sierra Leone               | 2015 | Census   | 5-year age groups  | De facto           | Included                             |
| Singapore                  | 1957 | Census   | 5-year age groups  | De facto           | Included                             |
| Singapore                  | 1970 | Census   | 1-year age groups  | De facto           | Included                             |
| Singapore                  | 1980 | Census   | 1-year age groups  | De facto           | Included                             |
| Singapore (Residents Only) | 1990 | Census   | 5-year age groups  | De facto           | Included                             |
| Singapore (Residents Only) | 2000 | Census   | 1-year age groups  | De jure            | Included                             |
| Singapore (Residents Only) | 2000 | Registry | 5-year age groups  | NA                 | Excluded                             |
| Singapore (Residents Only) | 2001 | Registry | 5-year age groups  | NA                 | Excluded                             |
| Singapore (Residents Only) | 2002 | Registry | 5-year age groups  | NA                 | Excluded                             |
| Singapore (Residents Only) | 2003 | Registry | 5-year age groups  | NA                 | Excluded                             |
| Singapore (Residents Only) | 2004 | Registry | 5-year age groups  | NA                 | Excluded                             |
| Singapore (Residents Only) | 2005 | Registry | 5-year age groups  | NA                 | Excluded                             |
| Singapore (Residents Only) | 2006 | Registry | 5-year age groups  | NA                 | Excluded                             |
| Singapore (Residents Only) | 2007 | Registry | 5-year age groups  | NA                 | Excluded                             |
| Singapore (Residents Only) | 2008 | Registry | 5-year age groups  | NA                 | Excluded                             |
| Singapore (Residents Only) | 2009 | Registry | 5-year age groups  | NA                 | Excluded                             |
| Singapore (Residents Only) | 2010 | Census   | 1-year age groups  | De jure            | Included                             |
| Singapore (Residents Only) | 2010 | Registry | 5-year age groups  | NA                 | Excluded                             |
| Singapore (Residents Only) | 2011 | Registry | 5-year age groups  | NA                 | Excluded                             |
| Singapore (Residents Only) | 2012 | Registry | 5-year age groups  | NA                 | Excluded                             |
| Singapore (Residents Only) | 2013 | Registry | 5-year age groups  | NA                 | Excluded                             |
| Singapore (Residents Only) | 2014 | Registry | 5-year age groups  | NA                 | Excluded                             |
| Singapore (Residents Only) | 2015 | Registry | 5-year age groups  | NA                 | Excluded                             |
| Singapore (Residents Only) | 2016 | Registry | 5-year age groups  | NA                 | Excluded                             |
| Singapore (Residents Only) | 2017 | Registry | 5-year age groups  | NA                 | Excluded                             |
| Slovakia                   | 1950 | Census   | 5-year age groups  | De jure            | Included                             |
| Slovakia                   | 1950 | Registry | 1-year age groups  | NA                 | Included                             |
| Slovakia                   | 1951 | Registry | 1-year age groups  | NA                 | Included                             |



**Appendix Table 5. List of all confirmed censuses by location and year**

| Location | Year | Type     | Age detail        | Enumeration method | Included or excluded from estimation |
|----------|------|----------|-------------------|--------------------|--------------------------------------|
| Slovakia | 1952 | Registry | 1-year age groups | NA                 | Included                             |
| Slovakia | 1953 | Registry | 1-year age groups | NA                 | Included                             |
| Slovakia | 1954 | Registry | 1-year age groups | NA                 | Included                             |
| Slovakia | 1955 | Registry | 1-year age groups | NA                 | Included                             |
| Slovakia | 1956 | Registry | 1-year age groups | NA                 | Included                             |
| Slovakia | 1957 | Registry | 1-year age groups | NA                 | Included                             |
| Slovakia | 1958 | Registry | 1-year age groups | NA                 | Included                             |
| Slovakia | 1959 | Registry | 1-year age groups | NA                 | Included                             |
| Slovakia | 1960 | Registry | 1-year age groups | NA                 | Included                             |
| Slovakia | 1961 | Census   | 1-year age groups | De jure            | Included                             |
| Slovakia | 1961 | Registry | 1-year age groups | NA                 | Included                             |
| Slovakia | 1962 | Registry | 1-year age groups | NA                 | Included                             |
| Slovakia | 1963 | Registry | 1-year age groups | NA                 | Included                             |
| Slovakia | 1964 | Registry | 1-year age groups | NA                 | Included                             |
| Slovakia | 1965 | Registry | 1-year age groups | NA                 | Included                             |
| Slovakia | 1966 | Registry | 1-year age groups | NA                 | Included                             |
| Slovakia | 1967 | Registry | 1-year age groups | NA                 | Included                             |
| Slovakia | 1968 | Registry | 1-year age groups | NA                 | Included                             |
| Slovakia | 1969 | Registry | 1-year age groups | NA                 | Included                             |
| Slovakia | 1970 | Census   | all ages only     | De jure            | Included                             |
| Slovakia | 1970 | Registry | 1-year age groups | NA                 | Included                             |
| Slovakia | 1971 | Registry | 1-year age groups | NA                 | Included                             |
| Slovakia | 1972 | Registry | 1-year age groups | NA                 | Included                             |
| Slovakia | 1973 | Registry | 1-year age groups | NA                 | Included                             |
| Slovakia | 1974 | Registry | 1-year age groups | NA                 | Included                             |
| Slovakia | 1975 | Registry | 1-year age groups | NA                 | Included                             |
| Slovakia | 1976 | Registry | 1-year age groups | NA                 | Included                             |
| Slovakia | 1977 | Registry | 1-year age groups | NA                 | Included                             |
| Slovakia | 1978 | Registry | 1-year age groups | NA                 | Included                             |
| Slovakia | 1979 | Registry | 1-year age groups | NA                 | Included                             |
| Slovakia | 1980 | Census   | 5-year age groups | De jure            | Included                             |
| Slovakia | 1980 | Registry | 1-year age groups | NA                 | Included                             |
| Slovakia | 1981 | Registry | 1-year age groups | NA                 | Included                             |
| Slovakia | 1982 | Registry | 1-year age groups | NA                 | Included                             |
| Slovakia | 1983 | Registry | 1-year age groups | NA                 | Included                             |
| Slovakia | 1984 | Registry | 1-year age groups | NA                 | Included                             |
| Slovakia | 1985 | Registry | 1-year age groups | NA                 | Included                             |
| Slovakia | 1986 | Registry | 1-year age groups | NA                 | Included                             |
| Slovakia | 1987 | Registry | 1-year age groups | NA                 | Included                             |
| Slovakia | 1988 | Registry | 1-year age groups | NA                 | Included                             |
| Slovakia | 1989 | Registry | 1-year age groups | NA                 | Included                             |
| Slovakia | 1990 | Registry | 1-year age groups | NA                 | Included                             |
| Slovakia | 1991 | Census   | 1-year age groups | De jure            | Included                             |
| Slovakia | 1991 | Registry | 1-year age groups | NA                 | Included                             |
| Slovakia | 1992 | Registry | 1-year age groups | NA                 | Included                             |
| Slovakia | 1993 | Registry | 1-year age groups | NA                 | Included                             |
| Slovakia | 1994 | Registry | 1-year age groups | NA                 | Included                             |
| Slovakia | 1995 | Registry | 1-year age groups | NA                 | Included                             |
| Slovakia | 1996 | Registry | 1-year age groups | NA                 | Included                             |
| Slovakia | 1997 | Registry | 1-year age groups | NA                 | Included                             |
| Slovakia | 1998 | Registry | 1-year age groups | NA                 | Included                             |
| Slovakia | 1999 | Registry | 1-year age groups | NA                 | Included                             |
| Slovakia | 2000 | Registry | 1-year age groups | NA                 | Included                             |
| Slovakia | 2001 | Census   | 1-year age groups | De jure            | Included                             |
| Slovakia | 2001 | Registry | 1-year age groups | NA                 | Included                             |
| Slovakia | 2002 | Registry | 1-year age groups | NA                 | Included                             |
| Slovakia | 2003 | Registry | 1-year age groups | NA                 | Included                             |
| Slovakia | 2004 | Registry | 1-year age groups | NA                 | Included                             |
| Slovakia | 2005 | Registry | 1-year age groups | NA                 | Included                             |
| Slovakia | 2006 | Registry | 1-year age groups | NA                 | Included                             |
| Slovakia | 2007 | Registry | 1-year age groups | NA                 | Included                             |
| Slovakia | 2008 | Registry | 1-year age groups | NA                 | Included                             |
| Slovakia | 2009 | Registry | 1-year age groups | NA                 | Included                             |
| Slovakia | 2010 | Registry | 1-year age groups | NA                 | Included                             |
| Slovakia | 2011 | Census   | 1-year age groups | De jure            | Included                             |
| Slovakia | 2011 | Registry | 1-year age groups | NA                 | Included                             |
| Slovakia | 2012 | Registry | 1-year age groups | NA                 | Included                             |
| Slovakia | 2013 | Registry | 1-year age groups | NA                 | Included                             |
| Slovakia | 2014 | Registry | 1-year age groups | NA                 | Included                             |
| Slovakia | 2015 | Registry | 1-year age groups | NA                 | Included                             |
| Slovakia | 2016 | Registry | 1-year age groups | NA                 | Included                             |
| Slovenia | 1953 | Census   | all ages only     | Unknown            | Included                             |
| Slovenia | 1961 | Census   | all ages only     | Unknown            | Included                             |
| Slovenia | 1971 | Census   | 1-year age groups | De facto           | Included                             |
| Slovenia | 1981 | Census   | all ages only     | Unknown            | Included                             |

**Appendix Table 5. List of all confirmed censuses by location and year**

| Location        | Year | Type     | Age detail        | Enumeration method | Included or excluded from estimation |
|-----------------|------|----------|-------------------|--------------------|--------------------------------------|
| Slovenia        | 1991 | Census   | 1-year age groups | De jure            | Excluded                             |
| Slovenia        | 1996 | Registry | 1-year age groups | NA                 | Included                             |
| Slovenia        | 1997 | Registry | 1-year age groups | NA                 | Included                             |
| Slovenia        | 1998 | Registry | 1-year age groups | NA                 | Included                             |
| Slovenia        | 1999 | Registry | 1-year age groups | NA                 | Included                             |
| Slovenia        | 2000 | Registry | 1-year age groups | NA                 | Included                             |
| Slovenia        | 2001 | Registry | 1-year age groups | NA                 | Included                             |
| Slovenia        | 2002 | Census   | 1-year age groups | De jure            | Included                             |
| Slovenia        | 2002 | Registry | 1-year age groups | NA                 | Included                             |
| Slovenia        | 2003 | Registry | 1-year age groups | NA                 | Included                             |
| Slovenia        | 2004 | Registry | 1-year age groups | NA                 | Included                             |
| Slovenia        | 2005 | Registry | 1-year age groups | NA                 | Included                             |
| Slovenia        | 2006 | Registry | 1-year age groups | NA                 | Included                             |
| Slovenia        | 2007 | Registry | 1-year age groups | NA                 | Included                             |
| Slovenia        | 2008 | Registry | 1-year age groups | NA                 | Included                             |
| Slovenia        | 2009 | Registry | 1-year age groups | NA                 | Included                             |
| Slovenia        | 2010 | Registry | 1-year age groups | NA                 | Included                             |
| Slovenia        | 2011 | Census   | 1-year age groups | De jure            | Included                             |
| Slovenia        | 2011 | Registry | 1-year age groups | NA                 | Included                             |
| Slovenia        | 2012 | Registry | 1-year age groups | NA                 | Included                             |
| Slovenia        | 2013 | Registry | 1-year age groups | NA                 | Included                             |
| Slovenia        | 2014 | Registry | 1-year age groups | NA                 | Included                             |
| Slovenia        | 2015 | Census   | 1-year age groups | De jure            | Included                             |
| Slovenia        | 2015 | Registry | 1-year age groups | NA                 | Included                             |
| Slovenia        | 2016 | Registry | 1-year age groups | NA                 | Included                             |
| Slovenia        | 2017 | Registry | 1-year age groups | NA                 | Included                             |
| Solomon Islands | 1959 | Census   | 5-year age groups | De facto           | Included                             |
| Solomon Islands | 1970 | Census   | 5-year age groups | De facto           | Included                             |
| Solomon Islands | 1976 | Census   | 5-year age groups | De facto           | Included                             |
| Solomon Islands | 1986 | Census   | 5-year age groups | De facto           | Included                             |
| Solomon Islands | 1999 | Census   | 5-year age groups | De facto           | Included                             |
| Solomon Islands | 2009 | Census   | 5-year age groups | De facto           | Included                             |
| Somalia         | 1953 | Census   | Not Available     | Unknown            | Excluded                             |
| Somalia         | 1975 | Census   | 5-year age groups | De facto           | Included                             |
| Somalia         | 1986 | Census   | Not Available     | Unknown            | Included                             |
| Somalia         | 1987 | Census   | all ages only     | Unknown            | Included                             |
| South Africa    | 1951 | Census   | 5-year age groups | De facto           | Included                             |
| South Africa    | 1960 | Census   | 1-year age groups | De facto           | Included                             |
| South Africa    | 1970 | Census   | 1-year age groups | De facto           | Included                             |
| South Africa    | 1980 | Census   | 5-year age groups | De facto           | Excluded                             |
| South Africa    | 1985 | Census   | 1-year age groups | De facto           | Excluded                             |
| South Africa    | 1991 | Census   | 1-year age groups | De facto           | Excluded                             |
| South Africa    | 1996 | Census   | 1-year age groups | De facto           | Included                             |
| South Africa    | 2001 | Census   | 5-year age groups | De facto           | Included                             |
| South Africa    | 2011 | Census   | 5-year age groups | De facto           | Included                             |
| South Korea     | 1955 | Census   | 5-year age groups | De facto           | Included                             |
| South Korea     | 1960 | Census   | 5-year age groups | De facto           | Included                             |
| South Korea     | 1966 | Census   | 1-year age groups | De facto           | Included                             |
| South Korea     | 1970 | Census   | 1-year age groups | De facto           | Included                             |
| South Korea     | 1975 | Census   | 5-year age groups | De facto           | Included                             |
| South Korea     | 1980 | Census   | 1-year age groups | De facto           | Included                             |
| South Korea     | 1985 | Census   | 1-year age groups | De facto           | Included                             |
| South Korea     | 1990 | Census   | 1-year age groups | De facto           | Included                             |
| South Korea     | 1995 | Census   | 1-year age groups | De jure            | Included                             |
| South Korea     | 2000 | Census   | 1-year age groups | De jure            | Included                             |
| South Korea     | 2005 | Census   | 1-year age groups | De jure            | Included                             |
| South Korea     | 2010 | Census   | 5-year age groups | De jure            | Included                             |
| South Korea     | 2015 | Census   | 1-year age groups | De jure            | Included                             |
| South Sudan     | 1956 | Census   | 5-year age groups | De jure            | Included                             |
| South Sudan     | 1973 | Census   | 5-year age groups | De facto           | Excluded                             |
| South Sudan     | 1983 | Census   | all ages only     | De jure            | Included                             |
| South Sudan     | 1993 | Census   | Not Available     | Unknown            | Excluded                             |
| South Sudan     | 2008 | Census   | 1-year age groups | De facto           | Included                             |
| Spain           | 1950 | Census   | 1-year age groups | De facto           | Included                             |
| Spain           | 1960 | Census   | 1-year age groups | De jure            | Included                             |
| Spain           | 1970 | Census   | 5-year age groups | Unknown            | Included                             |
| Spain           | 1981 | Census   | 5-year age groups | De jure            | Included                             |
| Spain           | 1991 | Census   | 1-year age groups | De jure            | Included                             |
| Spain           | 1998 | Registry | 1-year age groups | NA                 | Included                             |
| Spain           | 1999 | Registry | 1-year age groups | NA                 | Included                             |
| Spain           | 2000 | Registry | 1-year age groups | NA                 | Included                             |
| Spain           | 2001 | Census   | 1-year age groups | De facto           | Included                             |
| Spain           | 2001 | Registry | 1-year age groups | NA                 | Included                             |
| Spain           | 2002 | Registry | 1-year age groups | NA                 | Included                             |
| Spain           | 2003 | Registry | 1-year age groups | NA                 | Included                             |

**Appendix Table 5. List of all confirmed censuses by location and year**

| Location  | Year | Type     | Age detail         | Enumeration method | Included or excluded from estimation |
|-----------|------|----------|--------------------|--------------------|--------------------------------------|
| Spain     | 2004 | Registry | 1-year age groups  | NA                 | Included                             |
| Spain     | 2005 | Registry | 1-year age groups  | NA                 | Included                             |
| Spain     | 2006 | Registry | 1-year age groups  | NA                 | Included                             |
| Spain     | 2007 | Registry | 1-year age groups  | NA                 | Included                             |
| Spain     | 2008 | Registry | 1-year age groups  | NA                 | Included                             |
| Spain     | 2009 | Registry | 1-year age groups  | NA                 | Included                             |
| Spain     | 2010 | Registry | 1-year age groups  | NA                 | Included                             |
| Spain     | 2011 | Census   | 1-year age groups  | De jure            | Included                             |
| Spain     | 2011 | Registry | 1-year age groups  | NA                 | Included                             |
| Spain     | 2012 | Registry | 1-year age groups  | NA                 | Included                             |
| Spain     | 2013 | Registry | 1-year age groups  | NA                 | Included                             |
| Spain     | 2014 | Registry | 1-year age groups  | NA                 | Included                             |
| Spain     | 2015 | Registry | 1-year age groups  | NA                 | Included                             |
| Spain     | 2016 | Registry | 1-year age groups  | NA                 | Included                             |
| Sri Lanka | 1953 | Census   | 5-year age groups  | De facto           | Included                             |
| Sri Lanka | 1963 | Census   | 1-year age groups  | De facto           | Included                             |
| Sri Lanka | 1971 | Census   | 1-year age groups  | De facto           | Included                             |
| Sri Lanka | 1981 | Census   | 1-year age groups  | De facto           | Included                             |
| Sri Lanka | 2001 | Census   | 1-year age groups  | De facto           | Excluded                             |
| Sri Lanka | 2012 | Census   | 1-year age groups  | De jure            | Included                             |
| Sudan     | 1956 | Census   | 5-year age groups  | De jure            | Included                             |
| Sudan     | 1973 | Census   | 5-year age groups  | De facto           | Included                             |
| Sudan     | 1983 | Census   | all ages only      | De jure            | Included                             |
| Sudan     | 1993 | Census   | 5-year age groups  | De jure            | Included                             |
| Sudan     | 2008 | Census   | 1-year age groups  | Unknown            | Included                             |
| Suriname  | 1950 | Census   | 1-year age groups  | De facto           | Included                             |
| Suriname  | 1964 | Census   | 5-year age groups  | De facto           | Included                             |
| Suriname  | 1971 | Census   | all ages only      | De jure            | Included                             |
| Suriname  | 1980 | Census   | Not Available      | Unknown            | Excluded                             |
| Suriname  | 2000 | Census   | all ages only      | Unknown            | Included                             |
| Suriname  | 2004 | Census   | 1-year age groups  | De jure            | Included                             |
| Suriname  | 2012 | Census   | 1-year age groups  | De jure            | Included                             |
| Swaziland | 1956 | Census   | non-std age groups | De facto           | Excluded                             |
| Swaziland | 1966 | Census   | 1-year age groups  | De facto           | Included                             |
| Swaziland | 1976 | Census   | 5-year age groups  | De facto           | Included                             |
| Swaziland | 1986 | Census   | 1-year age groups  | De facto           | Included                             |
| Swaziland | 1997 | Census   | 1-year age groups  | De facto           | Included                             |
| Swaziland | 2007 | Census   | 1-year age groups  | De jure            | Included                             |
| Swaziland | 2017 | Census   | all ages only      | Unknown            | Included                             |
| Sweden    | 1950 | Census   | 1-year age groups  | De jure            | Included                             |
| Sweden    | 1960 | Census   | 5-year age groups  | De jure            | Included                             |
| Sweden    | 1965 | Census   | 5-year age groups  | De jure            | Included                             |
| Sweden    | 1968 | Registry | 1-year age groups  | NA                 | Included                             |
| Sweden    | 1969 | Registry | 1-year age groups  | NA                 | Included                             |
| Sweden    | 1970 | Census   | 5-year age groups  | De jure            | Included                             |
| Sweden    | 1970 | Registry | 1-year age groups  | NA                 | Included                             |
| Sweden    | 1971 | Registry | 1-year age groups  | NA                 | Included                             |
| Sweden    | 1972 | Registry | 1-year age groups  | NA                 | Included                             |
| Sweden    | 1973 | Registry | 1-year age groups  | NA                 | Included                             |
| Sweden    | 1974 | Registry | 1-year age groups  | NA                 | Included                             |
| Sweden    | 1975 | Census   | 5-year age groups  | De jure            | Included                             |
| Sweden    | 1975 | Registry | 1-year age groups  | NA                 | Included                             |
| Sweden    | 1976 | Registry | 1-year age groups  | NA                 | Included                             |
| Sweden    | 1977 | Registry | 1-year age groups  | NA                 | Included                             |
| Sweden    | 1978 | Registry | 1-year age groups  | NA                 | Included                             |
| Sweden    | 1979 | Registry | 1-year age groups  | NA                 | Included                             |
| Sweden    | 1980 | Census   | 1-year age groups  | De jure            | Included                             |
| Sweden    | 1980 | Registry | 1-year age groups  | NA                 | Included                             |
| Sweden    | 1981 | Registry | 1-year age groups  | NA                 | Included                             |
| Sweden    | 1982 | Registry | 1-year age groups  | NA                 | Included                             |
| Sweden    | 1983 | Registry | 1-year age groups  | NA                 | Included                             |
| Sweden    | 1984 | Registry | 1-year age groups  | NA                 | Included                             |
| Sweden    | 1985 | Census   | 5-year age groups  | De jure            | Included                             |
| Sweden    | 1985 | Registry | 1-year age groups  | NA                 | Included                             |
| Sweden    | 1986 | Registry | 1-year age groups  | NA                 | Included                             |
| Sweden    | 1987 | Registry | 1-year age groups  | NA                 | Included                             |
| Sweden    | 1988 | Registry | 1-year age groups  | NA                 | Included                             |
| Sweden    | 1989 | Registry | 1-year age groups  | NA                 | Included                             |
| Sweden    | 1990 | Census   | 1-year age groups  | De jure            | Included                             |
| Sweden    | 1990 | Registry | 1-year age groups  | NA                 | Included                             |
| Sweden    | 1991 | Registry | 1-year age groups  | NA                 | Included                             |
| Sweden    | 1992 | Registry | 1-year age groups  | NA                 | Included                             |
| Sweden    | 1993 | Registry | 1-year age groups  | NA                 | Included                             |
| Sweden    | 1994 | Registry | 1-year age groups  | NA                 | Included                             |
| Sweden    | 1995 | Registry | 1-year age groups  | NA                 | Included                             |

**Appendix Table 5. List of all confirmed censuses by location and year**

| Location    | Year | Type     | Age detail         | Enumeration method | Included or excluded from estimation |
|-------------|------|----------|--------------------|--------------------|--------------------------------------|
| Sweden      | 1996 | Registry | 1-year age groups  | NA                 | Included                             |
| Sweden      | 1997 | Registry | 1-year age groups  | NA                 | Included                             |
| Sweden      | 1998 | Registry | 1-year age groups  | NA                 | Included                             |
| Sweden      | 1999 | Registry | 1-year age groups  | NA                 | Included                             |
| Sweden      | 2000 | Registry | 1-year age groups  | NA                 | Included                             |
| Sweden      | 2001 | Registry | 1-year age groups  | NA                 | Included                             |
| Sweden      | 2002 | Registry | 1-year age groups  | NA                 | Included                             |
| Sweden      | 2003 | Census   | 1-year age groups  | De jure            | Included                             |
| Sweden      | 2003 | Registry | 1-year age groups  | NA                 | Included                             |
| Sweden      | 2004 | Registry | 1-year age groups  | NA                 | Included                             |
| Sweden      | 2005 | Registry | 1-year age groups  | NA                 | Included                             |
| Sweden      | 2006 | Registry | 1-year age groups  | NA                 | Included                             |
| Sweden      | 2007 | Registry | 1-year age groups  | NA                 | Included                             |
| Sweden      | 2008 | Registry | 1-year age groups  | NA                 | Included                             |
| Sweden      | 2009 | Registry | 1-year age groups  | NA                 | Included                             |
| Sweden      | 2010 | Registry | 1-year age groups  | NA                 | Included                             |
| Sweden      | 2011 | Census   | 1-year age groups  | De jure            | Included                             |
| Sweden      | 2011 | Registry | 1-year age groups  | NA                 | Included                             |
| Sweden      | 2012 | Registry | 1-year age groups  | NA                 | Included                             |
| Sweden      | 2013 | Registry | 1-year age groups  | NA                 | Included                             |
| Sweden      | 2014 | Registry | 1-year age groups  | NA                 | Included                             |
| Sweden      | 2015 | Registry | 1-year age groups  | NA                 | Included                             |
| Sweden      | 2016 | Registry | 1-year age groups  | NA                 | Included                             |
| Switzerland | 1950 | Census   | 1-year age groups  | De jure            | Included                             |
| Switzerland | 1960 | Census   | 5-year age groups  | De jure            | Included                             |
| Switzerland | 1970 | Census   | 1-year age groups  | De jure            | Included                             |
| Switzerland | 1980 | Census   | 1-year age groups  | De jure            | Included                             |
| Switzerland | 1990 | Census   | 1-year age groups  | De jure            | Included                             |
| Switzerland | 2000 | Census   | 5-year age groups  | De facto           | Included                             |
| Switzerland | 2010 | Census   | Not Available      | Unknown            | Included                             |
| Switzerland | 2010 | Registry | 1-year age groups  | NA                 | Included                             |
| Switzerland | 2011 | Census   | 1-year age groups  | De jure            | Included                             |
| Switzerland | 2011 | Registry | 1-year age groups  | NA                 | Included                             |
| Switzerland | 2012 | Registry | 1-year age groups  | NA                 | Included                             |
| Switzerland | 2013 | Registry | 1-year age groups  | NA                 | Included                             |
| Switzerland | 2014 | Registry | 1-year age groups  | NA                 | Included                             |
| Switzerland | 2015 | Registry | 1-year age groups  | NA                 | Included                             |
| Switzerland | 2016 | Registry | 1-year age groups  | NA                 | Included                             |
| Syria       | 1960 | Census   | 5-year age groups  | De facto           | Included                             |
| Syria       | 1970 | Census   | 1-year age groups  | De facto           | Included                             |
| Syria       | 1981 | Census   | 1-year age groups  | De facto           | Included                             |
| Syria       | 1994 | Census   | 1-year age groups  | De facto           | Included                             |
| Syria       | 2004 | Census   | 5-year age groups  | De facto           | Included                             |
| Taiwan      | 1950 | Registry | 1-year age groups  | NA                 | Included                             |
| Taiwan      | 1951 | Registry | 1-year age groups  | NA                 | Included                             |
| Taiwan      | 1952 | Registry | 1-year age groups  | NA                 | Included                             |
| Taiwan      | 1953 | Registry | 1-year age groups  | NA                 | Included                             |
| Taiwan      | 1954 | Registry | 1-year age groups  | NA                 | Included                             |
| Taiwan      | 1955 | Registry | 1-year age groups  | NA                 | Included                             |
| Taiwan      | 1956 | Census   | 5-year age groups  | De jure            | Included                             |
| Taiwan      | 1956 | Registry | 1-year age groups  | NA                 | Included                             |
| Taiwan      | 1957 | Registry | 1-year age groups  | NA                 | Included                             |
| Taiwan      | 1958 | Registry | 1-year age groups  | NA                 | Included                             |
| Taiwan      | 1959 | Registry | 1-year age groups  | NA                 | Included                             |
| Taiwan      | 1960 | Registry | 1-year age groups  | NA                 | Included                             |
| Taiwan      | 1961 | Registry | 1-year age groups  | NA                 | Included                             |
| Taiwan      | 1962 | Registry | 1-year age groups  | NA                 | Included                             |
| Taiwan      | 1963 | Registry | 1-year age groups  | NA                 | Included                             |
| Taiwan      | 1964 | Registry | 1-year age groups  | NA                 | Included                             |
| Taiwan      | 1965 | Registry | 5-year age groups  | NA                 | Included                             |
| Taiwan      | 1966 | Census   | Not Available      | Unknown            | Excluded                             |
| Taiwan      | 1966 | Registry | 5-year age groups  | NA                 | Included                             |
| Taiwan      | 1967 | Registry | 5-year age groups  | NA                 | Included                             |
| Taiwan      | 1968 | Registry | 5-year age groups  | NA                 | Included                             |
| Taiwan      | 1969 | Registry | non-std age groups | NA                 | Included                             |
| Taiwan      | 1970 | Registry | 1-year age groups  | NA                 | Included                             |
| Taiwan      | 1971 | Census   | 5-year age groups  | De jure            | Included                             |
| Taiwan      | 1971 | Registry | 1-year age groups  | NA                 | Included                             |
| Taiwan      | 1972 | Registry | 1-year age groups  | NA                 | Included                             |
| Taiwan      | 1973 | Registry | 1-year age groups  | NA                 | Included                             |
| Taiwan      | 1974 | Registry | 1-year age groups  | NA                 | Included                             |
| Taiwan      | 1975 | Census   | Not Available      | Unknown            | Excluded                             |
| Taiwan      | 1975 | Registry | 1-year age groups  | NA                 | Included                             |
| Taiwan      | 1976 | Registry | 1-year age groups  | NA                 | Included                             |
| Taiwan      | 1977 | Registry | 1-year age groups  | NA                 | Included                             |

**Appendix Table 5. List of all confirmed censuses by location and year**

| Location    | Year | Type     | Age detail         | Enumeration method | Included or excluded from estimation |
|-------------|------|----------|--------------------|--------------------|--------------------------------------|
| Taiwan      | 1978 | Registry | 1-year age groups  | NA                 | Included                             |
| Taiwan      | 1979 | Registry | 1-year age groups  | NA                 | Included                             |
| Taiwan      | 1980 | Census   | 5-year age groups  | Unknown            | Included                             |
| Taiwan      | 1980 | Registry | 1-year age groups  | NA                 | Included                             |
| Taiwan      | 1981 | Registry | 1-year age groups  | NA                 | Included                             |
| Taiwan      | 1982 | Registry | 1-year age groups  | NA                 | Included                             |
| Taiwan      | 1983 | Registry | 1-year age groups  | NA                 | Included                             |
| Taiwan      | 1984 | Registry | 1-year age groups  | NA                 | Included                             |
| Taiwan      | 1985 | Registry | 1-year age groups  | NA                 | Included                             |
| Taiwan      | 1986 | Registry | 1-year age groups  | NA                 | Included                             |
| Taiwan      | 1987 | Registry | 1-year age groups  | NA                 | Included                             |
| Taiwan      | 1988 | Registry | 1-year age groups  | NA                 | Included                             |
| Taiwan      | 1989 | Registry | 1-year age groups  | NA                 | Included                             |
| Taiwan      | 1990 | Census   | 1-year age groups  | De facto           | Included                             |
| Taiwan      | 1990 | Registry | 1-year age groups  | NA                 | Included                             |
| Taiwan      | 1991 | Registry | 1-year age groups  | NA                 | Included                             |
| Taiwan      | 1992 | Registry | 1-year age groups  | NA                 | Included                             |
| Taiwan      | 1993 | Registry | 1-year age groups  | NA                 | Included                             |
| Taiwan      | 1994 | Registry | 1-year age groups  | NA                 | Included                             |
| Taiwan      | 1995 | Registry | 1-year age groups  | NA                 | Included                             |
| Taiwan      | 1996 | Registry | 1-year age groups  | NA                 | Included                             |
| Taiwan      | 1997 | Registry | 1-year age groups  | NA                 | Included                             |
| Taiwan      | 1998 | Registry | 1-year age groups  | NA                 | Included                             |
| Taiwan      | 1999 | Registry | 1-year age groups  | NA                 | Included                             |
| Taiwan      | 2000 | Census   | 1-year age groups  | De facto           | Included                             |
| Taiwan      | 2000 | Registry | 1-year age groups  | NA                 | Included                             |
| Taiwan      | 2001 | Registry | 1-year age groups  | NA                 | Included                             |
| Taiwan      | 2002 | Registry | 1-year age groups  | NA                 | Included                             |
| Taiwan      | 2003 | Registry | 1-year age groups  | NA                 | Included                             |
| Taiwan      | 2004 | Registry | 1-year age groups  | NA                 | Included                             |
| Taiwan      | 2005 | Registry | 1-year age groups  | NA                 | Included                             |
| Taiwan      | 2006 | Registry | 1-year age groups  | NA                 | Included                             |
| Taiwan      | 2007 | Registry | 1-year age groups  | NA                 | Included                             |
| Taiwan      | 2008 | Registry | 1-year age groups  | NA                 | Included                             |
| Taiwan      | 2009 | Registry | 1-year age groups  | NA                 | Included                             |
| Taiwan      | 2010 | Census   | 5-year age groups  | De facto           | Included                             |
| Taiwan      | 2010 | Registry | 1-year age groups  | NA                 | Included                             |
| Taiwan      | 2011 | Registry | 1-year age groups  | NA                 | Included                             |
| Taiwan      | 2012 | Registry | 1-year age groups  | NA                 | Included                             |
| Taiwan      | 2013 | Registry | 1-year age groups  | NA                 | Included                             |
| Taiwan      | 2014 | Registry | 1-year age groups  | NA                 | Included                             |
| Taiwan      | 2015 | Registry | 1-year age groups  | NA                 | Included                             |
| Taiwan      | 2016 | Registry | 1-year age groups  | NA                 | Included                             |
| Taiwan      | 2017 | Registry | 1-year age groups  | NA                 | Included                             |
| Tajikistan  | 1959 | Census   | non-std age groups | De facto           | Included                             |
| Tajikistan  | 1970 | Census   | non-std age groups | De facto           | Included                             |
| Tajikistan  | 1979 | Census   | 5-year age groups  | De facto           | Included                             |
| Tajikistan  | 1989 | Census   | 1-year age groups  | De jure            | Included                             |
| Tajikistan  | 2000 | Census   | 1-year age groups  | De facto           | Included                             |
| Tajikistan  | 2010 | Census   | 1-year age groups  | De facto           | Included                             |
| Tanzania    | 1957 | Census   | 5-year age groups  | De jure            | Included                             |
| Tanzania    | 1967 | Census   | 1-year age groups  | De facto           | Included                             |
| Tanzania    | 1978 | Census   | 5-year age groups  | De facto           | Included                             |
| Tanzania    | 1988 | Census   | 1-year age groups  | De facto           | Included                             |
| Tanzania    | 2002 | Census   | 5-year age groups  | De facto           | Included                             |
| Tanzania    | 2012 | Census   | 1-year age groups  | De facto           | Included                             |
| Thailand    | 1960 | Census   | 5-year age groups  | De jure            | Included                             |
| Thailand    | 1970 | Census   | 5-year age groups  | De jure            | Included                             |
| Thailand    | 1980 | Census   | 1-year age groups  | De jure            | Included                             |
| Thailand    | 1990 | Census   | 5-year age groups  | De jure            | Included                             |
| Thailand    | 2000 | Census   | 1-year age groups  | De jure            | Included                             |
| Thailand    | 2010 | Census   | 1-year age groups  | De jure            | Included                             |
| The Bahamas | 1953 | Census   | 5-year age groups  | De facto           | Included                             |
| The Bahamas | 1963 | Census   | non-std age groups | Unknown            | Included                             |
| The Bahamas | 1970 | Census   | 1-year age groups  | De facto           | Included                             |
| The Bahamas | 1980 | Census   | 1-year age groups  | De facto           | Included                             |
| The Bahamas | 1990 | Census   | 1-year age groups  | De facto           | Included                             |
| The Bahamas | 2000 | Census   | 1-year age groups  | De facto           | Included                             |
| The Bahamas | 2010 | Census   | 1-year age groups  | De jure            | Included                             |
| The Gambia  | 1951 | Census   | Not Available      | Unknown            | Excluded                             |
| The Gambia  | 1963 | Census   | non-std age groups | De facto           | Included                             |
| The Gambia  | 1973 | Census   | 1-year age groups  | De facto           | Included                             |
| The Gambia  | 1983 | Census   | 1-year age groups  | De facto           | Included                             |
| The Gambia  | 1993 | Census   | 1-year age groups  | De facto           | Included                             |
| The Gambia  | 2003 | Census   | 5-year age groups  | De facto           | Included                             |



**Appendix Table 5. List of all confirmed censuses by location and year**

| Location            | Year | Type     | Age detail         | Enumeration method | Included or excluded from estimation |
|---------------------|------|----------|--------------------|--------------------|--------------------------------------|
| The Gambia          | 2013 | Census   | 5-year age groups  | De facto           | Included                             |
| Timor-Leste         | 1950 | Census   | all ages only      | Unknown            | Included                             |
| Timor-Leste         | 1960 | Census   | all ages only      | Unknown            | Included                             |
| Timor-Leste         | 1970 | Census   | Not Available      | Unknown            | Excluded                             |
| Timor-Leste         | 1980 | Census   | all ages only      | Unknown            | Included                             |
| Timor-Leste         | 1990 | Census   | 1-year age groups  | De jure            | Included                             |
| Timor-Leste         | 2004 | Census   | 5-year age groups  | De facto           | Included                             |
| Timor-Leste         | 2010 | Census   | 1-year age groups  | De facto           | Included                             |
| Timor-Leste         | 2015 | Census   | 5-year age groups  | De facto           | Included                             |
| Togo                | 1951 | Census   | Not Available      | Unknown            | Excluded                             |
| Togo                | 1958 | Census   | 1-year age groups  | De facto           | Included                             |
| Togo                | 1970 | Census   | 5-year age groups  | De jure            | Included                             |
| Togo                | 1981 | Census   | 5-year age groups  | De facto           | Included                             |
| Togo                | 2010 | Census   | 5-year age groups  | De jure            | Included                             |
| Tonga               | 1956 | Census   | 5-year age groups  | De facto           | Included                             |
| Tonga               | 1966 | Census   | 5-year age groups  | De facto           | Included                             |
| Tonga               | 1976 | Census   | 5-year age groups  | De jure            | Included                             |
| Tonga               | 1986 | Census   | 5-year age groups  | De facto           | Included                             |
| Tonga               | 1996 | Census   | 5-year age groups  | De facto           | Included                             |
| Tonga               | 2006 | Census   | 1-year age groups  | De jure            | Included                             |
| Tonga               | 2011 | Census   | non-std age groups | De jure            | Included                             |
| Tonga               | 2016 | Census   | all ages only      | De jure            | Included                             |
| Trinidad and Tobago | 1960 | Census   | 1-year age groups  | De jure            | Included                             |
| Trinidad and Tobago | 1970 | Census   | 1-year age groups  | De facto           | Included                             |
| Trinidad and Tobago | 1980 | Census   | 1-year age groups  | De facto           | Included                             |
| Trinidad and Tobago | 1990 | Census   | 5-year age groups  | De facto           | Included                             |
| Trinidad and Tobago | 2000 | Census   | 5-year age groups  | De facto           | Included                             |
| Trinidad and Tobago | 2011 | Census   | 1-year age groups  | De jure            | Included                             |
| Tunisia             | 1956 | Census   | non-std age groups | De facto           | Included                             |
| Tunisia             | 1966 | Census   | 1-year age groups  | De facto           | Included                             |
| Tunisia             | 1975 | Census   | 5-year age groups  | De facto           | Included                             |
| Tunisia             | 1984 | Census   | 1-year age groups  | De facto           | Included                             |
| Tunisia             | 1994 | Census   | 1-year age groups  | De facto           | Included                             |
| Tunisia             | 2004 | Census   | 5-year age groups  | De facto           | Included                             |
| Tunisia             | 2014 | Census   | 5-year age groups  | De facto           | Included                             |
| Turkey              | 1950 | Census   | 5-year age groups  | De facto           | Included                             |
| Turkey              | 1955 | Census   | 5-year age groups  | De facto           | Included                             |
| Turkey              | 1960 | Census   | 5-year age groups  | De facto           | Included                             |
| Turkey              | 1965 | Census   | 5-year age groups  | De facto           | Included                             |
| Turkey              | 1970 | Census   | 1-year age groups  | De facto           | Included                             |
| Turkey              | 1975 | Census   | 5-year age groups  | De facto           | Included                             |
| Turkey              | 1980 | Census   | 5-year age groups  | De facto           | Included                             |
| Turkey              | 1985 | Census   | 1-year age groups  | De facto           | Included                             |
| Turkey              | 1990 | Census   | 1-year age groups  | De facto           | Included                             |
| Turkey              | 2000 | Census   | 5-year age groups  | De facto           | Excluded                             |
| Turkey              | 2007 | Registry | 5-year age groups  | NA                 | Included                             |
| Turkey              | 2008 | Registry | 5-year age groups  | NA                 | Included                             |
| Turkey              | 2009 | Registry | 5-year age groups  | NA                 | Included                             |
| Turkey              | 2010 | Registry | 5-year age groups  | NA                 | Included                             |
| Turkey              | 2011 | Census   | 1-year age groups  | De jure            | Included                             |
| Turkey              | 2011 | Registry | 5-year age groups  | NA                 | Included                             |
| Turkey              | 2012 | Registry | 5-year age groups  | NA                 | Included                             |
| Turkey              | 2013 | Registry | 5-year age groups  | NA                 | Included                             |
| Turkey              | 2014 | Registry | 5-year age groups  | NA                 | Included                             |
| Turkey              | 2015 | Registry | 5-year age groups  | NA                 | Included                             |
| Turkey              | 2016 | Registry | 5-year age groups  | NA                 | Included                             |
| Turkey              | 2017 | Registry | 5-year age groups  | NA                 | Included                             |
| Turkmenistan        | 1959 | Census   | non-std age groups | De facto           | Included                             |
| Turkmenistan        | 1970 | Census   | non-std age groups | De facto           | Included                             |
| Turkmenistan        | 1979 | Census   | 5-year age groups  | De facto           | Included                             |
| Turkmenistan        | 1989 | Census   | 5-year age groups  | De facto           | Included                             |
| Turkmenistan        | 1995 | Census   | 5-year age groups  | De facto           | Excluded                             |
| Turkmenistan        | 2012 | Census   | Not Available      | Unknown            | Excluded                             |
| Turkmenistan        | 2015 | Census   | all ages only      | Unknown            | Included                             |
| Uganda              | 1959 | Census   | 5-year age groups  | Unknown            | Included                             |
| Uganda              | 1969 | Census   | 1-year age groups  | De facto           | Included                             |
| Uganda              | 1980 | Census   | all ages only      | De jure            | Excluded                             |
| Uganda              | 1991 | Census   | 1-year age groups  | De facto           | Included                             |
| Uganda              | 2002 | Census   | 1-year age groups  | De facto           | Included                             |
| Uganda              | 2014 | Census   | 1-year age groups  | De facto           | Included                             |
| Ukraine             | 1959 | Census   | non-std age groups | De facto           | Included                             |
| Ukraine             | 1970 | Census   | non-std age groups | De facto           | Included                             |
| Ukraine             | 1979 | Census   | 5-year age groups  | De facto           | Included                             |
| Ukraine             | 1989 | Census   | 5-year age groups  | De jure            | Included                             |
| Ukraine             | 2001 | Census   | 1-year age groups  | De facto           | Included                             |

**Appendix Table 5. List of all confirmed censuses by location and year**

| Location                                | Year | Type   | Age detail         | Enumeration method | Included or excluded from estimation |
|-----------------------------------------|------|--------|--------------------|--------------------|--------------------------------------|
| United Arab Emirates                    | 1968 | Census | non-std age groups | De facto           | Included                             |
| United Arab Emirates                    | 1975 | Census | 5-year age groups  | De facto           | Included                             |
| United Arab Emirates                    | 1980 | Census | 5-year age groups  | De jure            | Included                             |
| United Arab Emirates                    | 1985 | Census | 5-year age groups  | De facto           | Included                             |
| United Arab Emirates                    | 1995 | Census | 5-year age groups  | De facto           | Included                             |
| United Arab Emirates                    | 2005 | Census | 5-year age groups  | De facto           | Included                             |
| United States                           | 1950 | Census | 1-year age groups  | De jure            | Included                             |
| United States                           | 1960 | Census | 5-year age groups  | De jure            | Included                             |
| United States                           | 1970 | Census | 1-year age groups  | De jure            | Included                             |
| United States                           | 1980 | Census | 1-year age groups  | De jure            | Included                             |
| United States                           | 1990 | Census | 1-year age groups  | De jure            | Included                             |
| United States                           | 2000 | Census | 1-year age groups  | De jure            | Included                             |
| United States                           | 2010 | Census | 1-year age groups  | De jure            | Included                             |
| Uruguay                                 | 1963 | Census | 1-year age groups  | De facto           | Included                             |
| Uruguay                                 | 1975 | Census | 5-year age groups  | De facto           | Included                             |
| Uruguay                                 | 1985 | Census | 1-year age groups  | De facto           | Included                             |
| Uruguay                                 | 1996 | Census | 1-year age groups  | De facto           | Included                             |
| Uruguay                                 | 2004 | Census | 1-year age groups  | De facto           | Included                             |
| Uruguay                                 | 2011 | Census | 1-year age groups  | De jure            | Included                             |
| Uzbekistan                              | 1959 | Census | non-std age groups | De facto           | Included                             |
| Uzbekistan                              | 1970 | Census | non-std age groups | De facto           | Included                             |
| Uzbekistan                              | 1979 | Census | 5-year age groups  | De facto           | Included                             |
| Uzbekistan                              | 1989 | Census | 5-year age groups  | De jure            | Included                             |
| Vanuatu                                 | 1967 | Census | 5-year age groups  | De facto           | Included                             |
| Vanuatu                                 | 1979 | Census | 5-year age groups  | De facto           | Included                             |
| Vanuatu                                 | 1989 | Census | 1-year age groups  | De jure            | Included                             |
| Vanuatu                                 | 1999 | Census | 5-year age groups  | De facto           | Included                             |
| Vanuatu                                 | 2009 | Census | 1-year age groups  | De jure            | Included                             |
| Vanuatu                                 | 2016 | Census | 1-year age groups  | De jure            | Included                             |
| Venezuela                               | 1950 | Census | 1-year age groups  | De facto           | Included                             |
| Venezuela                               | 1961 | Census | 1-year age groups  | De facto           | Included                             |
| Venezuela                               | 1971 | Census | 5-year age groups  | De facto           | Included                             |
| Venezuela                               | 1981 | Census | 1-year age groups  | De facto           | Included                             |
| Venezuela                               | 1990 | Census | 1-year age groups  | De facto           | Included                             |
| Venezuela                               | 2001 | Census | non-std age groups | De facto           | Included                             |
| Venezuela                               | 2011 | Census | 1-year age groups  | De jure            | Included                             |
| Vietnam                                 | 1960 | Census | Not Available      | Unknown            | Excluded                             |
| Vietnam                                 | 1974 | Census | Not Available      | Unknown            | Excluded                             |
| Vietnam                                 | 1979 | Census | 5-year age groups  | De facto           | Included                             |
| Vietnam                                 | 1989 | Census | 1-year age groups  | De jure            | Included                             |
| Vietnam                                 | 1999 | Census | 1-year age groups  | De jure            | Included                             |
| Vietnam                                 | 2009 | Census | 1-year age groups  | De jure            | Included                             |
| Virgin Islands, U.S.                    | 1950 | Census | 5-year age groups  | De jure            | Included                             |
| Virgin Islands, U.S.                    | 1960 | Census | 5-year age groups  | De jure            | Included                             |
| Virgin Islands, U.S.                    | 1970 | Census | 5-year age groups  | De jure            | Included                             |
| Virgin Islands, U.S.                    | 1980 | Census | 1-year age groups  | De jure            | Included                             |
| Virgin Islands, U.S.                    | 1990 | Census | 5-year age groups  | De jure            | Included                             |
| Virgin Islands, U.S.                    | 2000 | Census | non-std age groups | De jure            | Included                             |
| Virgin Islands, U.S.                    | 2010 | Census | 5-year age groups  | De jure            | Included                             |
| Wales                                   | 1951 | Census | 5-year age groups  | De jure            | Included                             |
| Wales                                   | 1961 | Census | 5-year age groups  | De jure            | Included                             |
| Wales                                   | 1971 | Census | 5-year age groups  | De jure            | Included                             |
| Wales                                   | 1981 | Census | 5-year age groups  | De jure            | Included                             |
| Wales                                   | 1991 | Census | non-std age groups | De jure            | Included                             |
| Wales                                   | 2001 | Census | 5-year age groups  | De jure            | Included                             |
| Wales                                   | 2011 | Census | 1-year age groups  | De jure            | Included                             |
| Yemen                                   | 1994 | Census | 1-year age groups  | De facto           | Included                             |
| Yemen                                   | 2004 | Census | 5-year age groups  | De facto           | Included                             |
| Yemen (Arab Republic)                   | 1975 | Census | 5-year age groups  | Unknown            | Included                             |
| Yemen (Arab Republic)                   | 1986 | Census | all ages only      | Unknown            | Included                             |
| Yemen (People's Democratic Republic of) | 1973 | Census | all ages only      | De facto           | Included                             |
| Yugoslavia                              | 1953 | Census | 5-year age groups  | De jure            | Included                             |
| Yugoslavia                              | 1961 | Census | 5-year age groups  | De jure            | Included                             |
| Yugoslavia                              | 1971 | Census | 5-year age groups  | De jure            | Included                             |
| Yugoslavia                              | 1981 | Census | 5-year age groups  | De jure            | Included                             |
| Zambia                                  | 1951 | Census | Not Available      | Unknown            | Excluded                             |
| Zambia                                  | 1956 | Census | Not Available      | Unknown            | Excluded                             |
| Zambia                                  | 1961 | Census | Not Available      | Unknown            | Excluded                             |
| Zambia                                  | 1963 | Census | Not Available      | Unknown            | Excluded                             |
| Zambia                                  | 1969 | Census | 1-year age groups  | De facto           | Included                             |
| Zambia                                  | 1980 | Census | 1-year age groups  | De facto           | Included                             |
| Zambia                                  | 1990 | Census | 1-year age groups  | De facto           | Included                             |
| Zambia                                  | 2000 | Census | 1-year age groups  | De facto           | Included                             |
| Zambia                                  | 2010 | Census | 1-year age groups  | De jure            | Included                             |
| Zimbabwe                                | 1956 | Census | Not Available      | Unknown            | Excluded                             |

**Appendix Table 5. List of all confirmed censuses by location and year**

| Location | Year | Type   | Age detail         | Enumeration method | Included or excluded from estimation |
|----------|------|--------|--------------------|--------------------|--------------------------------------|
| Zimbabwe | 1961 | Census | Not Available      | Unknown            | Excluded                             |
| Zimbabwe | 1962 | Census | non-std age groups | De jure            | Excluded                             |
| Zimbabwe | 1969 | Census | Not Available      | Unknown            | Excluded                             |
| Zimbabwe | 1982 | Census | 1-year age groups  | De facto           | Included                             |
| Zimbabwe | 1992 | Census | 1-year age groups  | De facto           | Included                             |
| Zimbabwe | 2002 | Census | 1-year age groups  | De facto           | Included                             |
| Zimbabwe | 2012 | Census | 1-year age groups  | De facto           | Included                             |



**Appendix Table 6. GBD world population age standard**

| <b>Age group</b> | <b>Percent of Population</b> | <b>Rounded</b> |
|------------------|------------------------------|----------------|
| ENN              | 0.040802107                  | 0.04           |
| LNN              | 0.121276112                  | 0.12           |
| PNN              | 1.916163425                  | 1.92           |
| 0-1              | 2.078241644                  | 2.08           |
| 1-4              | 8.102445249                  | 8.1            |
| 5-9              | 9.677325318                  | 9.68           |
| 10-14            | 8.952609678                  | 8.95           |
| 15-19            | 8.382858071                  | 8.38           |
| 20-24            | 8.01707612                   | 8.02           |
| 25-29            | 7.778732811                  | 7.78           |
| 30-34            | 7.331586983                  | 7.33           |
| 35-39            | 6.775951151                  | 6.78           |
| 40-44            | 6.089034035                  | 6.09           |
| 45-49            | 5.465811837                  | 5.47           |
| 50-54            | 4.873621621                  | 4.87           |
| 55-59            | 4.251640217                  | 4.25           |
| 60-64            | 3.5961672                    | 3.6            |
| 65-69            | 2.914902912                  | 2.91           |
| 70-74            | 2.130279933                  | 2.13           |
| 75-79            | 1.608333391                  | 1.61           |
| 80-84            | 1.078423497                  | 1.08           |
| 85-89            | 0.603162091                  | 0.6            |
| 90-94            | 0.234261019                  | 0.23           |
| 95+              | 0.057535221                  | 0.06           |

**Appendix Table 7. Socio-demographic Index groupings by geography, based on 2017 values**

| Geography                                        | 2017 SDI | SDI Quintile    |
|--------------------------------------------------|----------|-----------------|
| Global                                           | 0.652    |                 |
| Central Europe, Eastern Europe, and Central Asia | 0.766    |                 |
| Central Asia                                     | 0.673    |                 |
| Armenia                                          | 0.702    | High-middle SDI |
| Azerbaijan                                       | 0.701    | High-middle SDI |
| Georgia                                          | 0.7      | High-middle SDI |
| Kazakhstan                                       | 0.735    | High-middle SDI |
| Kyrgyzstan                                       | 0.607    | Low-middle SDI  |
| Mongolia                                         | 0.662    | Middle SDI      |
| Tajikistan                                       | 0.523    | Low-middle SDI  |
| Turkmenistan                                     | 0.696    | Middle SDI      |
| Uzbekistan                                       | 0.63     | Middle SDI      |
| Central Europe                                   | 0.814    |                 |
| Albania                                          | 0.685    | Middle SDI      |
| Bosnia and Herzegovina                           | 0.713    | High-middle SDI |
| Bulgaria                                         | 0.792    | High-middle SDI |
| Croatia                                          | 0.825    | High SDI        |
| Czech Republic                                   | 0.851    | High SDI        |
| Hungary                                          | 0.817    | High-middle SDI |
| Macedonia                                        | 0.754    | High-middle SDI |
| Montenegro                                       | 0.788    | High-middle SDI |
| Poland                                           | 0.844    | High SDI        |
| Romania                                          | 0.784    | High-middle SDI |
| Serbia                                           | 0.752    | High-middle SDI |
| Slovakia                                         | 0.842    | High SDI        |
| Slovenia                                         | 0.86     | High SDI        |
| Eastern Europe                                   | 0.785    |                 |
| Belarus                                          | 0.773    | High-middle SDI |
| Estonia                                          | 0.858    | High SDI        |
| Latvia                                           | 0.825    | High SDI        |
| Lithuania                                        | 0.841    | High SDI        |
| Moldova                                          | 0.676    | Middle SDI      |
| Russian Federation                               | 0.792    | High-middle SDI |
| Ukraine                                          | 0.74     | High-middle SDI |
| High-income                                      | 0.854    |                 |
| Australasia                                      | 0.869    |                 |
| Australia                                        | 0.873    | High SDI        |
| New Zealand                                      | 0.842    | High SDI        |
| High-income Asia-Pacific                         | 0.869    |                 |
| Brunei                                           | 0.856    | High SDI        |
| Japan                                            | 0.865    | High SDI        |
| Aichi                                            | 0.875    | High SDI        |
| Akita                                            | 0.829    | High SDI        |
| Aomori                                           | 0.825    | High SDI        |

**Appendix Table 7. Socio-demographic Index groupings by geography, based on 2017 values**

| Geography   | 2017 SDI | SDI Quintile |
|-------------|----------|--------------|
| Chiba       | 0.859    | High SDI     |
| Ehime       | 0.838    | High SDI     |
| Fukui       | 0.852    | High SDI     |
| Fukuoka     | 0.855    | High SDI     |
| Fukushima   | 0.831    | High SDI     |
| Gifu        | 0.849    | High SDI     |
| Gunma       | 0.851    | High SDI     |
| Hiroshima   | 0.863    | High SDI     |
| Hokkaidō    | 0.842    | High SDI     |
| Hyōgo       | 0.86     | High SDI     |
| Ibaraki     | 0.851    | High SDI     |
| Ishikawa    | 0.856    | High SDI     |
| Iwate       | 0.825    | High SDI     |
| Kagawa      | 0.85     | High SDI     |
| Kagoshima   | 0.83     | High SDI     |
| Kanagawa    | 0.875    | High SDI     |
| Kōchi       | 0.825    | High SDI     |
| Kumamoto    | 0.832    | High SDI     |
| Kyōto       | 0.873    | High SDI     |
| Mie         | 0.854    | High SDI     |
| Miyagi      | 0.85     | High SDI     |
| Miyazaki    | 0.823    | High SDI     |
| Nagano      | 0.851    | High SDI     |
| Nagasaki    | 0.826    | High SDI     |
| Nara        | 0.848    | High SDI     |
| Niigata     | 0.843    | High SDI     |
| Ōita        | 0.846    | High SDI     |
| Okayama     | 0.856    | High SDI     |
| Okinawa     | 0.818    | High SDI     |
| Ōsaka       | 0.872    | High SDI     |
| Saga        | 0.834    | High SDI     |
| Saitama     | 0.852    | High SDI     |
| Shiga       | 0.871    | High SDI     |
| Shimane     | 0.831    | High SDI     |
| Shizuoka    | 0.859    | High SDI     |
| Tochigi     | 0.853    | High SDI     |
| Tokushima   | 0.845    | High SDI     |
| Tōkyō       | 0.924    | High SDI     |
| Tottori     | 0.834    | High SDI     |
| Toyama      | 0.86     | High SDI     |
| Wakayama    | 0.84     | High SDI     |
| Yamagata    | 0.832    | High SDI     |
| Yamaguchi   | 0.849    | High SDI     |
| Yamanashi   | 0.854    | High SDI     |
| South Korea | 0.872    | High SDI     |

**Appendix Table 7. Socio-demographic Index groupings by geography, based on 2017 values**

| Geography                 | 2017 SDI | SDI Quintile    |
|---------------------------|----------|-----------------|
| Singapore                 | 0.872    | High SDI        |
| High-income North America | 0.868    |                 |
| Canada                    | 0.882    | High SDI        |
| Greenland                 | 0.76     | High-middle SDI |
| USA                       | 0.867    | High SDI        |
| Alabama                   | 0.837    | High SDI        |
| Alaska                    | 0.861    | High SDI        |
| Arizona                   | 0.845    | High SDI        |
| Arkansas                  | 0.826    | High SDI        |
| California                | 0.872    | High SDI        |
| Colorado                  | 0.882    | High SDI        |
| Connecticut               | 0.906    | High SDI        |
| Delaware                  | 0.874    | High SDI        |
| Washington, DC            | 0.89     | High SDI        |
| Florida                   | 0.864    | High SDI        |
| Georgia                   | 0.848    | High SDI        |
| Hawaii                    | 0.872    | High SDI        |
| Idaho                     | 0.841    | High SDI        |
| Illinois                  | 0.879    | High SDI        |
| Indiana                   | 0.848    | High SDI        |
| Iowa                      | 0.87     | High SDI        |
| Kansas                    | 0.864    | High SDI        |
| Kentucky                  | 0.831    | High SDI        |
| Louisiana                 | 0.835    | High SDI        |
| Maine                     | 0.872    | High SDI        |
| Maryland                  | 0.896    | High SDI        |
| Massachusetts             | 0.913    | High SDI        |
| Michigan                  | 0.868    | High SDI        |
| Minnesota                 | 0.893    | High SDI        |
| Mississippi               | 0.819    | High SDI        |
| Missouri                  | 0.853    | High SDI        |
| Montana                   | 0.863    | High SDI        |
| Nebraska                  | 0.873    | High SDI        |
| Nevada                    | 0.847    | High SDI        |
| New Hampshire             | 0.904    | High SDI        |
| New Jersey                | 0.899    | High SDI        |
| New Mexico                | 0.835    | High SDI        |
| New York                  | 0.893    | High SDI        |
| North Carolina            | 0.85     | High SDI        |
| North Dakota              | 0.88     | High SDI        |
| Ohio                      | 0.858    | High SDI        |
| Oklahoma                  | 0.838    | High SDI        |
| Oregon                    | 0.871    | High SDI        |
| Pennsylvania              | 0.879    | High SDI        |
| Rhode Island              | 0.89     | High SDI        |

**Appendix Table 7. Socio-demographic Index groupings by geography, based on 2017 values**

| Geography               | 2017 SDI | SDI Quintile    |
|-------------------------|----------|-----------------|
| South Carolina          | 0.846    | High SDI        |
| South Dakota            | 0.86     | High SDI        |
| Tennessee               | 0.837    | High SDI        |
| Texas                   | 0.838    | High SDI        |
| Utah                    | 0.856    | High SDI        |
| Vermont                 | 0.896    | High SDI        |
| Virginia                | 0.885    | High SDI        |
| Washington              | 0.884    | High SDI        |
| West Virginia           | 0.825    | High SDI        |
| Wisconsin               | 0.878    | High SDI        |
| Wyoming                 | 0.869    | High SDI        |
| Southern Latin America  | 0.72     |                 |
| Argentina               | 0.71     | High-middle SDI |
| Chile                   | 0.748    | High-middle SDI |
| Uruguay                 | 0.707    | High-middle SDI |
| Western Europe          | 0.857    |                 |
| Andorra                 | 0.902    | High SDI        |
| Austria                 | 0.866    | High SDI        |
| Belgium                 | 0.886    | High SDI        |
| Cyprus                  | 0.865    | High SDI        |
| Denmark                 | 0.918    | High SDI        |
| Finland                 | 0.893    | High SDI        |
| France                  | 0.865    | High SDI        |
| Germany                 | 0.87     | High SDI        |
| Greece                  | 0.817    | High SDI        |
| Iceland                 | 0.907    | High SDI        |
| Ireland                 | 0.882    | High SDI        |
| Israel                  | 0.816    | High-middle SDI |
| Italy                   | 0.843    | High SDI        |
| Luxembourg              | 0.916    | High SDI        |
| Malta                   | 0.836    | High SDI        |
| Netherlands             | 0.912    | High SDI        |
| Norway                  | 0.911    | High SDI        |
| Portugal                | 0.778    | High-middle SDI |
| Spain                   | 0.825    | High SDI        |
| Sweden                  | 0.883    | High SDI        |
| Stockholm               | 0.914    | High SDI        |
| Sweden except Stockholm | 0.873    | High SDI        |
| Switzerland             | 0.889    | High SDI        |
| United Kingdom          | 0.843    | High SDI        |
| England                 | 0.849    | High SDI        |
| East Midlands           | 0.83     | High SDI        |
| Derby                   | 0.846    | High SDI        |
| Derbyshire              | 0.817    | High SDI        |
| Leicester               | 0.839    | High SDI        |

**Appendix Table 7. Socio-demographic Index groupings by geography, based on 2017 values**

| Geography              | 2017 SDI | SDI Quintile |
|------------------------|----------|--------------|
| Leicestershire         | 0.846    | High SDI     |
| Lincolnshire           | 0.812    | High SDI     |
| Northamptonshire       | 0.829    | High SDI     |
| Nottingham             | 0.863    | High SDI     |
| Nottinghamshire        | 0.814    | High SDI     |
| Rutland                | 0.833    | High SDI     |
| East of England        | 0.84     | High SDI     |
| Bedford                | 0.838    | High SDI     |
| Cambridgeshire         | 0.871    | High SDI     |
| Central Bedfordshire   | 0.834    | High SDI     |
| Essex                  | 0.832    | High SDI     |
| Hertfordshire          | 0.87     | High SDI     |
| Luton                  | 0.833    | High SDI     |
| Norfolk                | 0.826    | High SDI     |
| Peterborough           | 0.818    | High SDI     |
| Southend-on-Sea        | 0.811    | High SDI     |
| Suffolk                | 0.821    | High SDI     |
| Thurrock               | 0.807    | High SDI     |
| Greater London         | 0.894    | High SDI     |
| Barking and Dagenham   | 0.802    | High SDI     |
| Barnet                 | 0.865    | High SDI     |
| Bexley                 | 0.826    | High SDI     |
| Brent                  | 0.849    | High SDI     |
| Bromley                | 0.848    | High SDI     |
| Camden                 | 0.93     | High SDI     |
| Croydon                | 0.833    | High SDI     |
| Ealing                 | 0.865    | High SDI     |
| Enfield                | 0.839    | High SDI     |
| Greenwich              | 0.833    | High SDI     |
| Hackney                | 0.887    | High SDI     |
| Hammersmith and Fulham | 0.927    | High SDI     |
| Haringey               | 0.854    | High SDI     |
| Harrow                 | 0.848    | High SDI     |
| Havering               | 0.824    | High SDI     |
| Hillingdon             | 0.882    | High SDI     |
| Hounslow               | 0.879    | High SDI     |
| Islington              | 0.922    | High SDI     |
| Kensington and Chelsea | 0.932    | High SDI     |
| Kingston upon Thames   | 0.89     | High SDI     |
| Lambeth                | 0.9      | High SDI     |
| Lewisham               | 0.843    | High SDI     |
| Merton                 | 0.873    | High SDI     |
| Newham                 | 0.838    | High SDI     |
| Redbridge              | 0.831    | High SDI     |
| Richmond upon Thames   | 0.902    | High SDI     |

**Appendix Table 7. Socio-demographic Index groupings by geography, based on 2017 values**

| Geography                 | 2017 SDI | SDI Quintile |
|---------------------------|----------|--------------|
| Southwark                 | 0.912    | High SDI     |
| Sutton                    | 0.843    | High SDI     |
| Tower Hamlets             | 0.905    | High SDI     |
| Waltham Forest            | 0.819    | High SDI     |
| Wandsworth                | 0.911    | High SDI     |
| Westminster               | 0.927    | High SDI     |
| North East England        | 0.821    | High SDI     |
| County Durham             | 0.81     | High SDI     |
| Darlington                | 0.825    | High SDI     |
| Gateshead                 | 0.826    | High SDI     |
| Hartlepool                | 0.793    | High SDI     |
| Middlesbrough             | 0.808    | High SDI     |
| Newcastle upon Tyne       | 0.872    | High SDI     |
| North Tyneside            | 0.825    | High SDI     |
| Northumberland            | 0.808    | High SDI     |
| Redcar and Cleveland      | 0.79     | High SDI     |
| South Tyneside            | 0.794    | High SDI     |
| Stockton-on-Tees          | 0.823    | High SDI     |
| Sunderland                | 0.815    | High SDI     |
| North West England        | 0.834    | High SDI     |
| Blackburn with Darwen     | 0.802    | High SDI     |
| Blackpool                 | 0.781    | High SDI     |
| Bolton                    | 0.805    | High SDI     |
| Bury                      | 0.815    | High SDI     |
| Cheshire East             | 0.864    | High SDI     |
| Cheshire West and Chester | 0.855    | High SDI     |
| Cumbria                   | 0.828    | High SDI     |
| Halton                    | 0.824    | High SDI     |
| Knowsley                  | 0.816    | High SDI     |
| Lancashire                | 0.831    | High SDI     |
| Liverpool                 | 0.852    | High SDI     |
| Manchester                | 0.885    | High SDI     |
| Oldham                    | 0.79     | High SDI     |
| Rochdale                  | 0.795    | High SDI     |
| Salford                   | 0.838    | High SDI     |
| Sefton                    | 0.812    | High SDI     |
| St Helens                 | 0.803    | High SDI     |
| Stockport                 | 0.843    | High SDI     |
| Tameside                  | 0.797    | High SDI     |
| Trafford                  | 0.873    | High SDI     |
| Warrington                | 0.86     | High SDI     |
| Wigan                     | 0.798    | High SDI     |
| Wirral                    | 0.803    | High SDI     |
| South East England        | 0.856    | High SDI     |
| Bracknell Forest          | 0.869    | High SDI     |

**Appendix Table 7. Socio-demographic Index groupings by geography, based on 2017 values**

| <b>Geography</b>             | <b>2017 SDI</b> | <b>SDI Quintile</b> |
|------------------------------|-----------------|---------------------|
| Brighton and Hove            | 0.885           | High SDI            |
| Buckinghamshire              | 0.865           | High SDI            |
| East Sussex                  | 0.814           | High SDI            |
| Hampshire                    | 0.85            | High SDI            |
| Isle of Wight                | 0.814           | High SDI            |
| Kent                         | 0.828           | High SDI            |
| Medway                       | 0.809           | High SDI            |
| Milton Keynes                | 0.86            | High SDI            |
| Oxfordshire                  | 0.879           | High SDI            |
| Portsmouth                   | 0.86            | High SDI            |
| Reading                      | 0.895           | High SDI            |
| Slough                       | 0.859           | High SDI            |
| Southampton                  | 0.858           | High SDI            |
| Surrey                       | 0.883           | High SDI            |
| West Berkshire               | 0.872           | High SDI            |
| West Sussex                  | 0.843           | High SDI            |
| Windsor and Maidenhead       | 0.889           | High SDI            |
| Wokingham                    | 0.885           | High SDI            |
| South West England           | 0.841           | High SDI            |
| Bath and North East Somerset | 0.875           | High SDI            |
| Bournemouth                  | 0.858           | High SDI            |
| Bristol, City of             | 0.884           | High SDI            |
| Cornwall                     | 0.817           | High SDI            |
| Devon                        | 0.837           | High SDI            |
| Dorset                       | 0.825           | High SDI            |
| Gloucestershire              | 0.85            | High SDI            |
| North Somerset               | 0.832           | High SDI            |
| Plymouth                     | 0.836           | High SDI            |
| Poole                        | 0.842           | High SDI            |
| Somerset                     | 0.816           | High SDI            |
| South Gloucestershire        | 0.867           | High SDI            |
| Swindon                      | 0.847           | High SDI            |
| Torbay                       | 0.79            | High SDI            |
| Wiltshire                    | 0.829           | High SDI            |
| West Midlands                | 0.829           | High SDI            |
| Birmingham                   | 0.84            | High SDI            |
| Coventry                     | 0.848           | High SDI            |
| Dudley                       | 0.799           | High SDI            |
| Herefordshire, County of     | 0.828           | High SDI            |
| Sandwell                     | 0.797           | High SDI            |
| Shropshire                   | 0.832           | High SDI            |
| Solihull                     | 0.855           | High SDI            |
| Staffordshire                | 0.826           | High SDI            |
| Stoke-on-Trent               | 0.804           | High SDI            |
| Telford and Wrekin           | 0.822           | High SDI            |



**Appendix Table 7. Socio-demographic Index groupings by geography, based on 2017 values**

| Geography                        | 2017 SDI | SDI Quintile    |
|----------------------------------|----------|-----------------|
| Walsall                          | 0.791    | High SDI        |
| Warwickshire                     | 0.857    | High SDI        |
| Wolverhampton                    | 0.811    | High SDI        |
| Worcestershire                   | 0.833    | High SDI        |
| Yorkshire and the Humber         | 0.83     | High SDI        |
| Barnsley                         | 0.787    | High SDI        |
| Bradford                         | 0.807    | High SDI        |
| Calderdale                       | 0.827    | High SDI        |
| Doncaster                        | 0.791    | High SDI        |
| East Riding of Yorkshire         | 0.822    | High SDI        |
| Kingston upon Hull, City of      | 0.813    | High SDI        |
| Kirklees                         | 0.816    | High SDI        |
| Leeds                            | 0.868    | High SDI        |
| North East Lincolnshire          | 0.804    | High SDI        |
| North Lincolnshire               | 0.811    | High SDI        |
| North Yorkshire                  | 0.839    | High SDI        |
| Rotherham                        | 0.796    | High SDI        |
| Sheffield                        | 0.853    | High SDI        |
| Wakefield                        | 0.806    | High SDI        |
| York                             | 0.879    | High SDI        |
| Northern Ireland                 | 0.835    | High SDI        |
| Scotland                         | 0.805    | High SDI        |
| Wales                            | 0.806    | High SDI        |
| Latin America and Caribbean      | 0.64     |                 |
| Andean Latin America             | 0.628    |                 |
| Bolivia                          | 0.587    | Low-middle SDI  |
| Ecuador                          | 0.636    | Middle SDI      |
| Peru                             | 0.636    | Middle SDI      |
| Caribbean                        | 0.638    |                 |
| Antigua and Barbuda              | 0.715    | High-middle SDI |
| The Bahamas                      | 0.756    | High-middle SDI |
| Barbados                         | 0.739    | High-middle SDI |
| Belize                           | 0.602    | Low-middle SDI  |
| Bermuda                          | 0.805    | High-middle SDI |
| Cuba                             | 0.688    | Middle SDI      |
| Dominica                         | 0.687    | Middle SDI      |
| Dominican Republic               | 0.593    | Low-middle SDI  |
| Grenada                          | 0.64     | Middle SDI      |
| Guyana                           | 0.584    | Low-middle SDI  |
| Haiti                            | 0.442    | Low SDI         |
| Jamaica                          | 0.679    | Middle SDI      |
| Puerto Rico                      | 0.813    | High-middle SDI |
| Saint Lucia                      | 0.653    | Middle SDI      |
| Saint Vincent and the Grenadines | 0.608    | Middle SDI      |
| Suriname                         | 0.641    | Middle SDI      |

**Appendix Table 7. Socio-demographic Index groupings by geography, based on 2017 values**

| Geography                       | 2017 SDI | SDI Quintile    |
|---------------------------------|----------|-----------------|
| Trinidad and Tobago             | 0.698    | Middle SDI      |
| Virgin Islands                  | 0.807    | High-middle SDI |
| Central Latin America           | 0.623    |                 |
| Colombia                        | 0.634    | Middle SDI      |
| Costa Rica                      | 0.662    | Middle SDI      |
| El Salvador                     | 0.593    | Low-middle SDI  |
| Guatemala                       | 0.524    | Low-middle SDI  |
| Honduras                        | 0.512    | Low-middle SDI  |
| Mexico                          | 0.628    | Middle SDI      |
| Aguascalientes                  | 0.659    | Middle SDI      |
| Baja California                 | 0.657    | Middle SDI      |
| Baja California Sur             | 0.659    | Middle SDI      |
| Campeche                        | 0.616    | Middle SDI      |
| Chiapas                         | 0.533    | Middle SDI      |
| Chihuahua                       | 0.639    | Middle SDI      |
| Coahuila                        | 0.645    | Middle SDI      |
| Colima                          | 0.654    | Middle SDI      |
| Mexico City                     | 0.716    | Middle SDI      |
| Durango                         | 0.624    | Middle SDI      |
| Guanajuato                      | 0.621    | Middle SDI      |
| Guerrero                        | 0.562    | Middle SDI      |
| Hidalgo                         | 0.587    | Middle SDI      |
| Jalisco                         | 0.649    | Middle SDI      |
| México                          | 0.635    | Middle SDI      |
| Michoacán de Ocampo             | 0.586    | Middle SDI      |
| Morelos                         | 0.635    | Middle SDI      |
| Nayarit                         | 0.62     | Middle SDI      |
| Nuevo León                      | 0.677    | Middle SDI      |
| Oaxaca                          | 0.561    | Middle SDI      |
| Puebla                          | 0.584    | Middle SDI      |
| Querétaro                       | 0.639    | Middle SDI      |
| Quintana Roo                    | 0.626    | Middle SDI      |
| San Luis Potosí                 | 0.621    | Middle SDI      |
| Sinaloa                         | 0.649    | Middle SDI      |
| Sonora                          | 0.65     | Middle SDI      |
| Tabasco                         | 0.611    | Middle SDI      |
| Tamaulipas                      | 0.647    | Middle SDI      |
| Tlaxcala                        | 0.604    | Middle SDI      |
| Veracruz de Ignacio de la Llave | 0.592    | Middle SDI      |
| Yucatán                         | 0.63     | Middle SDI      |
| Zacatecas                       | 0.608    | Middle SDI      |
| Nicaragua                       | 0.53     | Low-middle SDI  |
| Panama                          | 0.677    | Middle SDI      |
| Venezuela                       | 0.655    | Middle SDI      |
| Tropical Latin America          | 0.662    |                 |

**Appendix Table 7. Socio-demographic Index groupings by geography, based on 2017 values**

| Geography                    | 2017 SDI | SDI Quintile    |
|------------------------------|----------|-----------------|
| Brazil                       | 0.663    | Middle SDI      |
| Acre                         | 0.602    | Low-middle SDI  |
| Alagoas                      | 0.556    | Low-middle SDI  |
| Amapá                        | 0.659    | Middle SDI      |
| Amazonas                     | 0.629    | Middle SDI      |
| Bahia                        | 0.591    | Low-middle SDI  |
| Ceará                        | 0.6      | Low-middle SDI  |
| Distrito Federal             | 0.792    | High-middle SDI |
| Espírito Santo               | 0.677    | Middle SDI      |
| Goiás                        | 0.65     | Middle SDI      |
| Maranhão                     | 0.507    | Low-middle SDI  |
| Mato Grosso                  | 0.662    | Middle SDI      |
| Mato Grosso do Sul           | 0.65     | Middle SDI      |
| Minas Gerais                 | 0.661    | Middle SDI      |
| Pará                         | 0.579    | Low-middle SDI  |
| Paraíba                      | 0.574    | Low-middle SDI  |
| Paraná                       | 0.682    | Middle SDI      |
| Pernambuco                   | 0.594    | Low-middle SDI  |
| Piauí                        | 0.552    | Low-middle SDI  |
| Rio de Janeiro               | 0.709    | High-middle SDI |
| Rio Grande do Norte          | 0.605    | Low-middle SDI  |
| Rio Grande do Sul            | 0.693    | Middle SDI      |
| Rondônia                     | 0.622    | Middle SDI      |
| Roraima                      | 0.646    | Middle SDI      |
| Santa Catarina               | 0.702    | High-middle SDI |
| São Paulo                    | 0.72     | High-middle SDI |
| Sergipe                      | 0.616    | Middle SDI      |
| Tocantins                    | 0.611    | Middle SDI      |
| Paraguay                     | 0.619    | Middle SDI      |
| North Africa and Middle East | 0.639    |                 |
| North Africa and Middle East | 0.639    |                 |
| Afghanistan                  | 0.29     | Low SDI         |
| Algeria                      | 0.696    | Middle SDI      |
| Bahrain                      | 0.712    | High-middle SDI |
| Egypt                        | 0.604    | Low-middle SDI  |
| Iran                         | 0.7      | High-middle SDI |
| Iraq                         | 0.585    | Low-middle SDI  |
| Jordan                       | 0.697    | Middle SDI      |
| Kuwait                       | 0.786    | High-middle SDI |
| Lebanon                      | 0.73     | High-middle SDI |
| Libya                        | 0.761    | High-middle SDI |
| Morocco                      | 0.579    | Low-middle SDI  |
| Palestine                    | 0.541    | Low-middle SDI  |
| Oman                         | 0.744    | High-middle SDI |
| Qatar                        | 0.766    | High-middle SDI |

**Appendix Table 7. Socio-demographic Index groupings by geography, based on 2017 values**

| Geography                          | 2017 SDI | SDI Quintile    |
|------------------------------------|----------|-----------------|
| Saudi Arabia                       | 0.779    | High-middle SDI |
| Sudan                              | 0.478    | Low-middle SDI  |
| Syria                              | 0.611    | Middle SDI      |
| Tunisia                            | 0.675    | Middle SDI      |
| Turkey                             | 0.729    | High-middle SDI |
| United Arab Emirates               | 0.795    | High-middle SDI |
| Yemen                              | 0.43     | Low SDI         |
| South Asia                         | 0.534    |                 |
| South Asia                         | 0.534    |                 |
| Bangladesh                         | 0.458    | Low SDI         |
| Bhutan                             | 0.57     | Low-middle SDI  |
| India                              | 0.55     | Low-middle SDI  |
| Andhra Pradesh                     | 0.536    | Low-middle SDI  |
| Arunachal Pradesh                  | 0.556    | Low-middle SDI  |
| Assam                              | 0.53     | Low-middle SDI  |
| Bihar                              | 0.433    | Low SDI         |
| Chhattisgarh                       | 0.512    | Low-middle SDI  |
| Delhi                              | 0.715    | High-middle SDI |
| Goa                                | 0.74     | High-middle SDI |
| Gujarat                            | 0.584    | Low-middle SDI  |
| Haryana                            | 0.6      | Low-middle SDI  |
| Himachal Pradesh                   | 0.633    | Middle SDI      |
| Jammu and Kashmir                  | 0.59     | Low-middle SDI  |
| Jharkhand                          | 0.487    | Low-middle SDI  |
| Karnataka                          | 0.574    | Low-middle SDI  |
| Kerala                             | 0.659    | Middle SDI      |
| Madhya Pradesh                     | 0.487    | Low-middle SDI  |
| Maharashtra                        | 0.618    | Middle SDI      |
| Manipur                            | 0.59     | Low-middle SDI  |
| Meghalaya                          | 0.565    | Low-middle SDI  |
| Mizoram                            | 0.616    | Middle SDI      |
| Nagaland                           | 0.633    | Middle SDI      |
| Odisha                             | 0.524    | Low-middle SDI  |
| Punjab                             | 0.622    | Middle SDI      |
| Rajasthan                          | 0.492    | Low-middle SDI  |
| Sikkim                             | 0.628    | Middle SDI      |
| Tamil Nadu                         | 0.615    | Middle SDI      |
| Telangana                          | 0.575    | Low-middle SDI  |
| Tripura                            | 0.543    | Low-middle SDI  |
| Uttar Pradesh                      | 0.488    | Low-middle SDI  |
| Uttarakhand                        | 0.607    | Middle SDI      |
| West Bengal                        | 0.538    | Low-middle SDI  |
| Union Territories other than Delhi | 0.653    | Middle SDI      |
| Nepal                              | 0.429    | Low SDI         |
| Pakistan                           | 0.492    | Low-middle SDI  |

**Appendix Table 7. Socio-demographic Index groupings by geography, based on 2017 values**

| Geography                              | 2017 SDI | SDI Quintile    |
|----------------------------------------|----------|-----------------|
| Southeast Asia, East Asia, and Oceania | 0.685    |                 |
| East Asia                              | 0.709    |                 |
| China                                  | 0.707    | High-middle SDI |
| North Korea                            | 0.538    | Low-middle SDI  |
| Taiwan (Province of China)             | 0.864    | High SDI        |
| Oceania                                | 0.471    |                 |
| American Samoa                         | 0.702    | High-middle SDI |
| Federated States of Micronesia         | 0.575    | Low-middle SDI  |
| Fiji                                   | 0.641    | Middle SDI      |
| Guam                                   | 0.794    | High-middle SDI |
| Kiribati                               | 0.427    | Low SDI         |
| Marshall Islands                       | 0.55     | Low-middle SDI  |
| Northern Mariana Islands               | 0.758    | High-middle SDI |
| Papua New Guinea                       | 0.419    | Low SDI         |
| Samoa                                  | 0.576    | Low-middle SDI  |
| Solomon Islands                        | 0.425    | Low SDI         |
| Tonga                                  | 0.625    | Middle SDI      |
| Vanuatu                                | 0.475    | Low-middle SDI  |
| Southeast Asia                         | 0.641    |                 |
| Cambodia                               | 0.482    | Low-middle SDI  |
| Indonesia                              | 0.648    | Middle SDI      |
| Laos                                   | 0.519    | Low-middle SDI  |
| Malaysia                               | 0.759    | High-middle SDI |
| Maldives                               | 0.655    | Middle SDI      |
| Mauritius                              | 0.72     | High-middle SDI |
| Myanmar                                | 0.556    | Low-middle SDI  |
| Philippines                            | 0.617    | Middle SDI      |
| Sri Lanka                              | 0.68     | Middle SDI      |
| Seychelles                             | 0.692    | Middle SDI      |
| Thailand                               | 0.684    | Middle SDI      |
| Timor-Leste                            | 0.505    | Low-middle SDI  |
| Vietnam                                | 0.607    | Middle SDI      |
| Sub-Saharan Africa                     | 0.446    |                 |
| Central sub-Saharan Africa             | 0.457    |                 |
| Angola                                 | 0.461    | Low-middle SDI  |
| Central African Republic               | 0.334    | Low SDI         |
| Congo (Brazzaville)                    | 0.574    | Low-middle SDI  |
| DR Congo                               | 0.364    | Low SDI         |
| Equatorial Guinea                      | 0.625    | Middle SDI      |
| Gabon                                  | 0.651    | Middle SDI      |
| Eastern sub-Saharan Africa             | 0.387    |                 |
| Burundi                                | 0.31     | Low SDI         |
| Comoros                                | 0.434    | Low SDI         |
| Djibouti                               | 0.485    | Low-middle SDI  |
| Eritrea                                | 0.409    | Low SDI         |

**Appendix Table 7. Socio-demographic Index groupings by geography, based on 2017 values**

| Geography       | 2017 SDI | SDI Quintile   |
|-----------------|----------|----------------|
| Ethiopia        | 0.334    | Low SDI        |
| Kenya           | 0.499    | Low-middle SDI |
| Baringo         | 0.444    | Low-middle SDI |
| Bomet           | 0.496    | Low-middle SDI |
| Bungoma         | 0.463    | Low-middle SDI |
| Busia           | 0.438    | Low-middle SDI |
| Elgeyo Marakwet | 0.496    | Low-middle SDI |
| Embu            | 0.533    | Low-middle SDI |
| Garissa         | 0.334    | Low-middle SDI |
| Homa Bay        | 0.425    | Low-middle SDI |
| Isiolo          | 0.385    | Low-middle SDI |
| Kajiado         | 0.534    | Low-middle SDI |
| Kakamega        | 0.45     | Low-middle SDI |
| Kericho         | 0.5      | Low-middle SDI |
| Kiambu          | 0.58     | Low-middle SDI |
| Kilifi          | 0.456    | Low-middle SDI |
| Kirinyaga       | 0.533    | Low-middle SDI |
| Kisii           | 0.522    | Low-middle SDI |
| Kisumu          | 0.503    | Low-middle SDI |
| Kitui           | 0.461    | Low-middle SDI |
| Kwale           | 0.457    | Low-middle SDI |
| Laikipia        | 0.556    | Low-middle SDI |
| Lamu            | 0.453    | Low-middle SDI |
| Machakos        | 0.518    | Low-middle SDI |
| Makueni         | 0.469    | Low-middle SDI |
| Mandera         | 0.295    | Low-middle SDI |
| Marsabit        | 0.34     | Low-middle SDI |
| Meru            | 0.508    | Low-middle SDI |
| Migori          | 0.419    | Low-middle SDI |
| Mombasa         | 0.568    | Low-middle SDI |
| Murang'a        | 0.528    | Low-middle SDI |
| Nairobi         | 0.674    | Low-middle SDI |
| Nakuru          | 0.545    | Low-middle SDI |
| Nandi           | 0.501    | Low-middle SDI |
| Narok           | 0.402    | Low-middle SDI |
| Nyamira         | 0.544    | Low-middle SDI |
| Nyandarua       | 0.534    | Low-middle SDI |
| Nyeri           | 0.554    | Low-middle SDI |
| Samburu         | 0.308    | Low-middle SDI |
| Siaya           | 0.46     | Low-middle SDI |
| Taita Taveta    | 0.529    | Low-middle SDI |
| Tana River      | 0.379    | Low-middle SDI |
| Tharaka Nithi   | 0.528    | Low-middle SDI |
| Trans Nzoia     | 0.496    | Low-middle SDI |
| Turkana         | 0.295    | Low-middle SDI |

**Appendix Table 7. Socio-demographic Index groupings by geography, based on 2017 values**

| Geography                   | 2017 SDI | SDI Quintile   |
|-----------------------------|----------|----------------|
| Uasin Gishu                 | 0.545    | Low-middle SDI |
| Vihiga                      | 0.477    | Low-middle SDI |
| Wajir                       | 0.243    | Low-middle SDI |
| West Pokot                  | 0.382    | Low-middle SDI |
| Madagascar                  | 0.331    | Low SDI        |
| Malawi                      | 0.349    | Low SDI        |
| Mozambique                  | 0.34     | Low SDI        |
| Rwanda                      | 0.407    | Low SDI        |
| Somalia                     | 0.235    | Low SDI        |
| South Sudan                 | 0.275    | Low SDI        |
| Tanzania                    | 0.412    | Low SDI        |
| Uganda                      | 0.388    | Low SDI        |
| Zambia                      | 0.472    | Low-middle SDI |
| Southern sub-Saharan Africa | 0.64     |                |
| Botswana                    | 0.663    | Middle SDI     |
| Lesotho                     | 0.493    | Low-middle SDI |
| Namibia                     | 0.616    | Middle SDI     |
| South Africa                | 0.677    | Middle SDI     |
| Swaziland                   | 0.578    | Low-middle SDI |
| Zimbabwe                    | 0.463    | Low-middle SDI |
| Western sub-Saharan Africa  | 0.441    |                |
| Benin                       | 0.373    | Low SDI        |
| Burkina Faso                | 0.284    | Low SDI        |
| Cameroon                    | 0.482    | Low-middle SDI |
| Cape Verde                  | 0.549    | Low-middle SDI |
| Chad                        | 0.253    | Low SDI        |
| Cote d'Ivoire               | 0.412    | Low SDI        |
| The Gambia                  | 0.405    | Low SDI        |
| Ghana                       | 0.537    | Low-middle SDI |
| Guinea                      | 0.325    | Low SDI        |
| Guinea-Bissau               | 0.349    | Low SDI        |
| Liberia                     | 0.328    | Low SDI        |
| Mali                        | 0.267    | Low SDI        |
| Mauritania                  | 0.471    | Low-middle SDI |
| Niger                       | 0.191    | Low SDI        |
| Nigeria                     | 0.493    | Low-middle SDI |
| Sao Tome and Principe       | 0.488    | Low-middle SDI |
| Senegal                     | 0.373    | Low SDI        |
| Sierra Leone                | 0.357    | Low SDI        |
| Togo                        | 0.413    | Low SDI        |

**Appendix Table 8. Socio-Demographic Index values for all estimated GBD 2017 locations, 1950-1969**

| Location                                         | 1950  | 1951  | 1952  | 1953  | 1954  | 1955  | 1956  | 1957  | 1958  | 1959  | 1960  | 1961  | 1962  | 1963  | 1964  | 1965  | 1966  | 1967  | 1968  | 1969  |
|--------------------------------------------------|-------|-------|-------|-------|-------|-------|-------|-------|-------|-------|-------|-------|-------|-------|-------|-------|-------|-------|-------|-------|
| Global                                           | 0.359 | 0.361 | 0.364 | 0.366 | 0.368 | 0.371 | 0.372 | 0.373 | 0.374 | 0.376 | 0.378 | 0.381 | 0.385 | 0.389 | 0.393 | 0.398 | 0.402 | 0.406 | 0.411 | 0.417 |
| Central Europe, Eastern Europe, and Central Asia | 0.53  | 0.533 | 0.539 | 0.543 | 0.545 | 0.549 | 0.551 | 0.552 | 0.553 | 0.554 | 0.557 | 0.563 | 0.57  | 0.577 | 0.584 | 0.59  | 0.591 | 0.591 | 0.593 | 0.594 |
| Central Asia                                     | 0.404 | 0.408 | 0.412 | 0.415 | 0.418 | 0.421 | 0.424 | 0.427 | 0.429 | 0.431 | 0.435 | 0.44  | 0.446 | 0.45  | 0.455 | 0.46  | 0.464 | 0.469 | 0.474 | 0.48  |
| Armenia                                          | 0.378 | 0.381 | 0.386 | 0.391 | 0.396 | 0.402 | 0.409 | 0.416 | 0.422 | 0.428 | 0.436 | 0.445 | 0.452 | 0.457 | 0.464 | 0.471 | 0.477 | 0.484 | 0.489 | 0.495 |
| Azerbaijan                                       | 0.381 | 0.384 | 0.39  | 0.395 | 0.4   | 0.406 | 0.413 | 0.419 | 0.425 | 0.43  | 0.436 | 0.444 | 0.451 | 0.456 | 0.465 | 0.473 | 0.481 | 0.488 | 0.496 | 0.503 |
| Georgia                                          | 0.477 | 0.481 | 0.487 | 0.493 | 0.499 | 0.506 | 0.513 | 0.519 | 0.524 | 0.528 | 0.534 | 0.539 | 0.545 | 0.548 | 0.553 | 0.558 | 0.562 | 0.566 | 0.569 | 0.573 |
| Kazakhstan                                       | 0.437 | 0.442 | 0.447 | 0.45  | 0.451 | 0.453 | 0.454 | 0.455 | 0.456 | 0.457 | 0.46  | 0.465 | 0.473 | 0.481 | 0.49  | 0.497 | 0.504 | 0.511 | 0.517 | 0.522 |
| Kyrgyzstan                                       | 0.43  | 0.433 | 0.437 | 0.44  | 0.443 | 0.446 | 0.45  | 0.452 | 0.455 | 0.456 | 0.46  | 0.464 | 0.469 | 0.471 | 0.474 | 0.477 | 0.479 | 0.481 | 0.483 | 0.484 |
| Mongolia                                         | 0.323 | 0.33  | 0.336 | 0.343 | 0.349 | 0.354 | 0.356 | 0.358 | 0.359 | 0.361 | 0.364 | 0.367 | 0.37  | 0.373 | 0.378 | 0.384 | 0.39  | 0.397 | 0.403 | 0.41  |
| Tajikistan                                       | 0.271 | 0.273 | 0.276 | 0.278 | 0.281 | 0.284 | 0.288 | 0.292 | 0.295 | 0.297 | 0.301 | 0.306 | 0.309 | 0.309 | 0.312 | 0.316 | 0.32  | 0.322 | 0.324 | 0.326 |
| Turkmenistan                                     | 0.421 | 0.424 | 0.428 | 0.431 | 0.434 | 0.437 | 0.44  | 0.442 | 0.444 | 0.445 | 0.447 | 0.45  | 0.453 | 0.457 | 0.463 | 0.469 | 0.475 | 0.481 | 0.486 | 0.491 |
| Uzbekistan                                       | 0.331 | 0.332 | 0.334 | 0.336 | 0.337 | 0.338 | 0.34  | 0.341 | 0.343 | 0.344 | 0.347 | 0.352 | 0.355 | 0.358 | 0.362 | 0.367 | 0.371 | 0.376 | 0.38  | 0.384 |
| Central Europe                                   | 0.519 | 0.523 | 0.526 | 0.527 | 0.528 | 0.531 | 0.534 | 0.536 | 0.54  | 0.544 | 0.549 | 0.555 | 0.56  | 0.564 | 0.57  | 0.576 | 0.575 | 0.573 | 0.579 | 0.585 |
| Albania                                          | 0.369 | 0.372 | 0.371 | 0.371 | 0.373 | 0.374 | 0.376 | 0.378 | 0.38  | 0.382 | 0.385 | 0.389 | 0.394 | 0.4   | 0.407 | 0.413 | 0.417 | 0.42  | 0.423 | 0.427 |
| Bosnia and Herzegovina                           | 0.259 | 0.264 | 0.27  | 0.274 | 0.276 | 0.283 | 0.287 | 0.292 | 0.297 | 0.306 | 0.315 | 0.323 | 0.329 | 0.337 | 0.345 | 0.353 | 0.36  | 0.367 | 0.373 | 0.38  |
| Bulgaria                                         | 0.48  | 0.496 | 0.498 | 0.503 | 0.504 | 0.504 | 0.505 | 0.509 | 0.511 | 0.512 | 0.516 | 0.523 | 0.53  | 0.534 | 0.542 | 0.551 | 0.556 | 0.553 | 0.552 | 0.558 |
| Croatia                                          | 0.505 | 0.509 | 0.513 | 0.518 | 0.523 | 0.53  | 0.535 | 0.542 | 0.549 | 0.555 | 0.563 | 0.57  | 0.576 | 0.583 | 0.591 | 0.597 | 0.604 | 0.61  | 0.616 | 0.622 |
| Czech Republic                                   | 0.598 | 0.6   | 0.605 | 0.609 | 0.611 | 0.612 | 0.613 | 0.618 | 0.625 | 0.629 | 0.63  | 0.63  | 0.627 | 0.626 | 0.633 | 0.644 | 0.652 | 0.658 | 0.66  | 0.662 |
| Hungary                                          | 0.516 | 0.521 | 0.521 | 0.515 | 0.513 | 0.518 | 0.525 | 0.532 | 0.538 | 0.544 | 0.55  | 0.558 | 0.566 | 0.57  | 0.574 | 0.575 | 0.573 | 0.575 | 0.576 | 0.582 |
| Macedonia                                        | 0.444 | 0.447 | 0.451 | 0.455 | 0.458 | 0.464 | 0.469 | 0.475 | 0.481 | 0.486 | 0.492 | 0.498 | 0.502 | 0.508 | 0.517 | 0.523 | 0.53  | 0.535 | 0.541 | 0.546 |
| Montenegro                                       | 0.56  | 0.564 | 0.569 | 0.574 | 0.578 | 0.583 | 0.588 | 0.592 | 0.596 | 0.6   | 0.604 | 0.608 | 0.612 | 0.616 | 0.621 | 0.625 | 0.629 | 0.634 | 0.638 | 0.643 |
| Poland                                           | 0.537 | 0.538 | 0.538 | 0.538 | 0.536 | 0.536 | 0.535 | 0.535 | 0.539 | 0.546 | 0.554 | 0.561 | 0.567 | 0.574 | 0.581 | 0.588 | 0.597 | 0.603 | 0.607 | 0.61  |
| Romania                                          | 0.462 | 0.468 | 0.473 | 0.478 | 0.483 | 0.488 | 0.492 | 0.496 | 0.5   | 0.505 | 0.511 | 0.518 | 0.524 | 0.528 | 0.537 | 0.542 | 0.513 | 0.482 | 0.499 | 0.519 |
| Serbia                                           | 0.52  | 0.524 | 0.527 | 0.527 | 0.53  | 0.538 | 0.545 | 0.547 | 0.545 | 0.541 | 0.539 | 0.542 | 0.545 | 0.547 | 0.547 | 0.549 | 0.553 | 0.556 | 0.56  | 0.566 |
| Slovakia                                         | 0.544 | 0.546 | 0.55  | 0.554 | 0.555 | 0.555 | 0.556 | 0.561 | 0.565 | 0.567 | 0.571 | 0.576 | 0.581 | 0.585 | 0.592 | 0.6   | 0.609 | 0.617 | 0.621 | 0.623 |
| Slovenia                                         | 0.571 | 0.578 | 0.584 | 0.589 | 0.594 | 0.597 | 0.601 | 0.606 | 0.611 | 0.615 | 0.619 | 0.621 | 0.622 | 0.623 | 0.623 | 0.626 | 0.631 | 0.638 | 0.645 | 0.648 |
| Eastern Europe                                   | 0.545 | 0.549 | 0.558 | 0.563 | 0.566 | 0.572 | 0.574 | 0.573 | 0.573 | 0.575 | 0.576 | 0.583 | 0.593 | 0.601 | 0.611 | 0.617 | 0.62  | 0.622 | 0.621 | 0.618 |
| Belarus                                          | 0.487 | 0.49  | 0.495 | 0.499 | 0.502 | 0.506 | 0.51  | 0.514 | 0.518 | 0.522 | 0.527 | 0.532 | 0.537 | 0.54  | 0.544 | 0.548 | 0.55  | 0.552 | 0.554 | 0.556 |
| Estonia                                          | 0.606 | 0.61  | 0.615 | 0.621 | 0.626 | 0.631 | 0.637 | 0.64  | 0.644 | 0.646 | 0.649 | 0.654 | 0.66  | 0.665 | 0.669 | 0.671 | 0.672 | 0.672 | 0.67  | 0.669 |
| Latvia                                           | 0.578 | 0.584 | 0.59  | 0.595 | 0.598 | 0.601 | 0.605 | 0.609 | 0.613 | 0.616 | 0.62  | 0.624 | 0.631 | 0.637 | 0.643 | 0.647 | 0.649 | 0.65  | 0.651 | 0.651 |
| Lithuania                                        | 0.565 | 0.572 | 0.581 | 0.589 | 0.597 | 0.606 | 0.614 | 0.619 | 0.624 | 0.627 | 0.631 | 0.636 | 0.643 | 0.649 | 0.653 | 0.656 | 0.658 | 0.659 | 0.659 | 0.658 |
| Moldova                                          | 0.419 | 0.424 | 0.43  | 0.435 | 0.441 | 0.446 | 0.451 | 0.457 | 0.463 | 0.469 | 0.476 | 0.483 | 0.49  | 0.495 | 0.499 | 0.504 | 0.508 | 0.513 | 0.517 | 0.521 |
| Russian Federation                               | 0.555 | 0.559 | 0.57  | 0.575 | 0.578 | 0.585 | 0.586 | 0.584 | 0.582 | 0.582 | 0.582 | 0.589 | 0.602 | 0.612 | 0.624 | 0.632 | 0.635 | 0.635 | 0.632 | 0.628 |
| Ukraine                                          | 0.515 | 0.52  | 0.525 | 0.529 | 0.533 | 0.537 | 0.54  | 0.542 | 0.545 | 0.548 | 0.552 | 0.558 | 0.564 | 0.569 | 0.575 | 0.58  | 0.584 | 0.586 | 0.589 | 0.59  |
| High-income                                      | 0.598 | 0.601 | 0.603 | 0.606 | 0.607 | 0.609 | 0.61  | 0.611 | 0.612 | 0.614 | 0.616 | 0.619 | 0.623 | 0.627 | 0.633 | 0.639 | 0.645 | 0.651 | 0.657 | 0.661 |
| Australasia                                      | 0.621 | 0.616 | 0.612 | 0.612 | 0.611 | 0.609 | 0.607 | 0.606 | 0.606 | 0.607 | 0.608 | 0.612 | 0.621 | 0.633 | 0.642 | 0.649 | 0.654 | 0.656 | 0.658 | 0.661 |
| Australia                                        | 0.628 | 0.622 | 0.618 | 0.617 | 0.616 | 0.614 | 0.612 | 0.611 | 0.611 | 0.613 | 0.614 | 0.618 | 0.626 | 0.636 | 0.647 | 0.654 | 0.659 | 0.66  | 0.662 | 0.665 |
| New Zealand                                      | 0.589 | 0.588 | 0.587 | 0.586 | 0.585 | 0.585 | 0.585 | 0.584 | 0.583 | 0.581 | 0.579 | 0.583 | 0.599 | 0.616 | 0.622 | 0.623 | 0.628 | 0.634 | 0.639 | 0.643 |
| High-income Asia-Pacific                         | 0.532 | 0.543 | 0.551 | 0.558 | 0.563 | 0.569 | 0.575 | 0.58  | 0.582 | 0.587 | 0.594 | 0.602 | 0.608 | 0.615 | 0.619 | 0.628 | 0.635 | 0.639 | 0.65  | 0.658 |
| Brunei                                           | 0.436 | 0.436 | 0.434 | 0.428 | 0.421 | 0.417 | 0.416 | 0.415 | 0.417 | 0.426 | 0.444 | 0.466 | 0.486 | 0.5   | 0.512 | 0.523 | 0.532 | 0.541 | 0.551 | 0.561 |
| Japan                                            | 0.555 | 0.568 | 0.577 | 0.585 | 0.591 | 0.597 | 0.605 | 0.609 | 0.613 | 0.618 | 0.627 | 0.635 | 0.642 | 0.649 | 0.652 | 0.662 | 0.67  | 0.674 | 0.685 | 0.693 |
| Aichi                                            | 0.563 | 0.576 | 0.586 | 0.593 | 0.599 | 0.605 | 0.613 | 0.617 | 0.62  | 0.625 | 0.633 | 0.641 | 0.648 | 0.654 | 0.656 | 0.667 | 0.674 | 0.676 | 0.689 | 0.696 |
| Akita                                            | 0.527 | 0.539 | 0.548 | 0.555 | 0.56  | 0.565 | 0.573 | 0.577 | 0.579 | 0.584 | 0.592 | 0.599 | 0.606 | 0.613 | 0.615 | 0.626 | 0.633 | 0.636 | 0.648 | 0.656 |
| Aomori                                           | 0.517 | 0.53  | 0.54  | 0.547 | 0.553 | 0.558 | 0.566 | 0.57  | 0.572 | 0.577 | 0.585 | 0.593 | 0.6   | 0.606 | 0.608 | 0.619 | 0.626 | 0.629 | 0.641 | 0.648 |
| Chiba                                            | 0.55  | 0.562 | 0.572 | 0.579 | 0.585 | 0.592 | 0.599 | 0.604 | 0.607 | 0.613 | 0.621 | 0.63  | 0.637 | 0.644 | 0.647 | 0.657 | 0.665 | 0.668 | 0.68  | 0.688 |
| Ehime                                            | 0.528 | 0.541 | 0.55  | 0.558 | 0.564 | 0.569 | 0.577 | 0.581 | 0.584 | 0.59  | 0.598 | 0.606 | 0.613 | 0.62  | 0.622 | 0.633 | 0.641 | 0.644 | 0.657 | 0.664 |
| Fukui                                            | 0.532 | 0.545 | 0.555 | 0.562 | 0.568 | 0.574 | 0.581 | 0.586 | 0.588 | 0.593 | 0.601 | 0.609 | 0.616 | 0.622 | 0.624 | 0.635 | 0.643 | 0.645 | 0.658 | 0.666 |
| Fukuoka                                          | 0.55  | 0.562 | 0.572 | 0.579 | 0.585 | 0.591 | 0.599 | 0.603 | 0.607 | 0.612 | 0.62  | 0.629 | 0.636 | 0.643 | 0.647 | 0.657 | 0.665 | 0.669 | 0.681 | 0.688 |
| Fukushima                                        | 0.527 | 0.54  | 0.549 | 0.557 | 0.562 | 0.568 | 0.575 | 0.58  | 0.582 | 0.587 | 0.595 | 0.602 | 0.61  | 0.616 | 0.619 | 0.63  | 0.637 | 0.64  | 0.653 | 0.66  |
| Gifu                                             | 0.535 | 0.547 | 0.556 | 0.564 | 0.569 | 0.575 | 0.583 | 0.587 | 0.59  | 0.596 | 0.604 | 0.612 | 0.619 | 0.625 | 0.628 | 0.639 | 0.646 | 0.649 | 0.661 | 0.669 |
| Gunma                                            | 0.541 | 0.554 | 0.563 | 0.571 | 0.576 | 0.582 | 0.59  | 0.595 | 0.598 | 0.603 | 0.612 | 0.62  | 0.627 | 0.634 | 0.637 | 0.648 | 0.656 | 0.66  | 0.672 | 0.679 |
| Hiroshima                                        | 0.55  | 0.563 | 0.573 | 0.581 | 0.587 | 0.593 | 0.6   | 0.605 | 0.607 | 0.613 | 0.621 | 0.629 | 0.636 | 0.642 | 0.    |       |       |       |       |       |



**Appendix Table 8. Socio-Demographic Index values for all estimated GBD 2017 locations, 1950-1969**

| Location                  | 1950  | 1951  | 1952  | 1953  | 1954  | 1955  | 1956  | 1957  | 1958  | 1959  | 1960  | 1961  | 1962  | 1963  | 1964  | 1965  | 1966  | 1967  | 1968  | 1969  |
|---------------------------|-------|-------|-------|-------|-------|-------|-------|-------|-------|-------|-------|-------|-------|-------|-------|-------|-------|-------|-------|-------|
| Miyazaki                  | 0.515 | 0.528 | 0.538 | 0.545 | 0.551 | 0.556 | 0.564 | 0.568 | 0.571 | 0.576 | 0.584 | 0.592 | 0.599 | 0.606 | 0.608 | 0.619 | 0.627 | 0.63  | 0.642 | 0.65  |
| Nagano                    | 0.55  | 0.56  | 0.569 | 0.576 | 0.581 | 0.587 | 0.594 | 0.599 | 0.603 | 0.609 | 0.617 | 0.625 | 0.632 | 0.64  | 0.644 | 0.654 | 0.662 | 0.667 | 0.678 | 0.686 |
| Nagasaki                  | 0.525 | 0.537 | 0.546 | 0.553 | 0.558 | 0.564 | 0.571 | 0.575 | 0.578 | 0.584 | 0.592 | 0.599 | 0.607 | 0.614 | 0.617 | 0.627 | 0.635 | 0.639 | 0.651 | 0.658 |
| Nara                      | 0.535 | 0.546 | 0.555 | 0.563 | 0.569 | 0.575 | 0.582 | 0.587 | 0.591 | 0.597 | 0.606 | 0.614 | 0.622 | 0.629 | 0.634 | 0.644 | 0.652 | 0.656 | 0.668 | 0.676 |
| Niigata                   | 0.534 | 0.546 | 0.555 | 0.562 | 0.568 | 0.573 | 0.581 | 0.585 | 0.588 | 0.593 | 0.601 | 0.608 | 0.616 | 0.622 | 0.625 | 0.636 | 0.643 | 0.646 | 0.658 | 0.666 |
| Ōita                      | 0.541 | 0.553 | 0.562 | 0.569 | 0.575 | 0.581 | 0.588 | 0.593 | 0.596 | 0.602 | 0.61  | 0.618 | 0.625 | 0.632 | 0.635 | 0.645 | 0.653 | 0.657 | 0.669 | 0.676 |
| Okayama                   | 0.537 | 0.551 | 0.561 | 0.568 | 0.574 | 0.58  | 0.588 | 0.593 | 0.595 | 0.601 | 0.609 | 0.617 | 0.624 | 0.631 | 0.633 | 0.644 | 0.651 | 0.654 | 0.667 | 0.674 |
| Okinawa                   | 0.505 | 0.519 | 0.53  | 0.538 | 0.543 | 0.549 | 0.557 | 0.562 | 0.564 | 0.569 | 0.577 | 0.584 | 0.592 | 0.598 | 0.6   | 0.612 | 0.619 | 0.621 | 0.634 | 0.641 |
| Ōsaka                     | 0.572 | 0.585 | 0.594 | 0.602 | 0.608 | 0.614 | 0.621 | 0.626 | 0.629 | 0.634 | 0.642 | 0.65  | 0.657 | 0.664 | 0.667 | 0.677 | 0.684 | 0.687 | 0.699 | 0.706 |
| Saga                      | 0.527 | 0.539 | 0.548 | 0.555 | 0.561 | 0.566 | 0.574 | 0.579 | 0.582 | 0.587 | 0.595 | 0.603 | 0.611 | 0.618 | 0.621 | 0.632 | 0.64  | 0.644 | 0.656 | 0.664 |
| Saitama                   | 0.543 | 0.555 | 0.564 | 0.572 | 0.578 | 0.584 | 0.591 | 0.596 | 0.6   | 0.605 | 0.614 | 0.622 | 0.629 | 0.636 | 0.639 | 0.649 | 0.657 | 0.66  | 0.672 | 0.68  |
| Shiga                     | 0.552 | 0.565 | 0.574 | 0.582 | 0.588 | 0.594 | 0.602 | 0.606 | 0.609 | 0.615 | 0.623 | 0.631 | 0.638 | 0.645 | 0.648 | 0.659 | 0.667 | 0.67  | 0.682 | 0.69  |
| Shimane                   | 0.518 | 0.53  | 0.54  | 0.547 | 0.553 | 0.558 | 0.566 | 0.57  | 0.573 | 0.579 | 0.587 | 0.594 | 0.602 | 0.609 | 0.612 | 0.623 | 0.63  | 0.634 | 0.646 | 0.654 |
| Shizuoka                  | 0.553 | 0.565 | 0.575 | 0.582 | 0.588 | 0.593 | 0.601 | 0.605 | 0.608 | 0.613 | 0.621 | 0.629 | 0.636 | 0.642 | 0.644 | 0.655 | 0.662 | 0.665 | 0.677 | 0.684 |
| Tochigi                   | 0.543 | 0.556 | 0.565 | 0.573 | 0.579 | 0.584 | 0.592 | 0.596 | 0.599 | 0.604 | 0.612 | 0.62  | 0.627 | 0.634 | 0.637 | 0.648 | 0.655 | 0.659 | 0.671 | 0.678 |
| Tokushima                 | 0.529 | 0.542 | 0.551 | 0.559 | 0.564 | 0.57  | 0.578 | 0.582 | 0.585 | 0.59  | 0.598 | 0.606 | 0.613 | 0.62  | 0.623 | 0.634 | 0.641 | 0.645 | 0.657 | 0.665 |
| Tōkyō                     | 0.642 | 0.652 | 0.661 | 0.667 | 0.673 | 0.678 | 0.685 | 0.69  | 0.694 | 0.699 | 0.707 | 0.714 | 0.721 | 0.728 | 0.732 | 0.74  | 0.747 | 0.752 | 0.762 | 0.77  |
| Tottori                   | 0.521 | 0.534 | 0.543 | 0.551 | 0.557 | 0.563 | 0.57  | 0.575 | 0.578 | 0.584 | 0.592 | 0.6   | 0.607 | 0.614 | 0.617 | 0.628 | 0.636 | 0.64  | 0.652 | 0.66  |
| Toyama                    | 0.541 | 0.554 | 0.563 | 0.571 | 0.576 | 0.582 | 0.59  | 0.594 | 0.596 | 0.601 | 0.609 | 0.617 | 0.624 | 0.63  | 0.632 | 0.643 | 0.65  | 0.652 | 0.665 | 0.672 |
| Wakayama                  | 0.524 | 0.538 | 0.547 | 0.555 | 0.561 | 0.567 | 0.575 | 0.58  | 0.582 | 0.588 | 0.596 | 0.604 | 0.611 | 0.618 | 0.62  | 0.631 | 0.639 | 0.642 | 0.655 | 0.662 |
| Yamagata                  | 0.524 | 0.536 | 0.545 | 0.552 | 0.557 | 0.563 | 0.57  | 0.575 | 0.577 | 0.582 | 0.59  | 0.598 | 0.605 | 0.612 | 0.615 | 0.626 | 0.634 | 0.637 | 0.649 | 0.657 |
| Yamaguchi                 | 0.545 | 0.558 | 0.567 | 0.575 | 0.581 | 0.586 | 0.594 | 0.599 | 0.601 | 0.607 | 0.615 | 0.623 | 0.63  | 0.637 | 0.639 | 0.65  | 0.658 | 0.661 | 0.673 | 0.681 |
| Yamanashi                 | 0.55  | 0.56  | 0.569 | 0.576 | 0.581 | 0.587 | 0.594 | 0.599 | 0.603 | 0.609 | 0.617 | 0.625 | 0.632 | 0.64  | 0.644 | 0.654 | 0.662 | 0.667 | 0.678 | 0.686 |
| South Korea               | 0.39  | 0.389 | 0.392 | 0.401 | 0.408 | 0.414 | 0.418 | 0.423 | 0.427 | 0.431 | 0.435 | 0.438 | 0.442 | 0.445 | 0.448 | 0.451 | 0.457 | 0.464 | 0.472 | 0.482 |
| Singapore                 | 0.419 | 0.414 | 0.406 | 0.403 | 0.407 | 0.412 | 0.416 | 0.422 | 0.428 | 0.443 | 0.458 | 0.467 | 0.476 | 0.486 | 0.499 | 0.509 | 0.518 | 0.533 | 0.548 | 0.559 |
| High-income North America | 0.619 | 0.614 | 0.612 | 0.607 | 0.603 | 0.598 | 0.59  | 0.59  | 0.592 | 0.593 | 0.596 | 0.603 | 0.617 | 0.63  | 0.647 | 0.662 | 0.673 | 0.685 | 0.692 | 0.695 |
| Canada                    | 0.632 | 0.627 | 0.622 | 0.617 | 0.615 | 0.614 | 0.611 | 0.608 | 0.608 | 0.608 | 0.612 | 0.617 | 0.624 | 0.633 | 0.647 | 0.663 | 0.673 | 0.681 | 0.689 | 0.694 |
| Greenland                 | 0.48  | 0.487 | 0.49  | 0.488 | 0.483 | 0.479 | 0.476 | 0.473 | 0.469 | 0.465 | 0.461 | 0.459 | 0.457 | 0.451 | 0.444 | 0.445 | 0.458 | 0.481 | 0.512 | 0.543 |
| USA                       | 0.617 | 0.612 | 0.611 | 0.606 | 0.601 | 0.596 | 0.587 | 0.588 | 0.59  | 0.591 | 0.593 | 0.601 | 0.616 | 0.629 | 0.646 | 0.662 | 0.673 | 0.685 | 0.692 | 0.695 |
| Alabama                   | 0.543 | 0.537 | 0.536 | 0.529 | 0.523 | 0.517 | 0.506 | 0.507 | 0.511 | 0.513 | 0.517 | 0.528 | 0.547 | 0.563 | 0.584 | 0.603 | 0.615 | 0.629 | 0.637 | 0.638 |
| Alaska                    | 0.609 | 0.601 | 0.599 | 0.588 | 0.578 | 0.565 | 0.544 | 0.54  | 0.539 | 0.535 | 0.535 | 0.545 | 0.568 | 0.587 | 0.614 | 0.637 | 0.652 | 0.669 | 0.679 | 0.68  |
| Arizona                   | 0.592 | 0.586 | 0.585 | 0.577 | 0.57  | 0.562 | 0.55  | 0.55  | 0.552 | 0.553 | 0.557 | 0.568 | 0.588 | 0.604 | 0.626 | 0.645 | 0.657 | 0.67  | 0.677 | 0.677 |
| Arkansas                  | 0.529 | 0.522 | 0.52  | 0.511 | 0.504 | 0.497 | 0.484 | 0.484 | 0.487 | 0.489 | 0.493 | 0.505 | 0.526 | 0.544 | 0.567 | 0.587 | 0.601 | 0.617 | 0.626 | 0.627 |
| California                | 0.649 | 0.644 | 0.644 | 0.639 | 0.635 | 0.63  | 0.621 | 0.621 | 0.623 | 0.623 | 0.625 | 0.632 | 0.645 | 0.657 | 0.674 | 0.689 | 0.699 | 0.711 | 0.719 | 0.723 |
| Colorado                  | 0.64  | 0.636 | 0.636 | 0.63  | 0.625 | 0.62  | 0.611 | 0.611 | 0.612 | 0.612 | 0.614 | 0.621 | 0.635 | 0.647 | 0.664 | 0.679 | 0.69  | 0.702 | 0.71  | 0.713 |
| Connecticut               | 0.672 | 0.669 | 0.669 | 0.666 | 0.663 | 0.66  | 0.654 | 0.653 | 0.653 | 0.653 | 0.654 | 0.658 | 0.668 | 0.677 | 0.691 | 0.704 | 0.714 | 0.726 | 0.734 | 0.74  |
| Delaware                  | 0.647 | 0.64  | 0.639 | 0.632 | 0.627 | 0.622 | 0.613 | 0.612 | 0.613 | 0.612 | 0.613 | 0.619 | 0.633 | 0.645 | 0.662 | 0.678 | 0.688 | 0.701 | 0.71  | 0.713 |
| Washington, DC            | 0.663 | 0.657 | 0.654 | 0.647 | 0.641 | 0.633 | 0.621 | 0.62  | 0.621 | 0.62  | 0.62  | 0.627 | 0.643 | 0.657 | 0.674 | 0.69  | 0.702 | 0.716 | 0.727 | 0.73  |
| Florida                   | 0.604 | 0.596 | 0.596 | 0.59  | 0.585 | 0.58  | 0.57  | 0.572 | 0.575 | 0.578 | 0.581 | 0.591 | 0.607 | 0.621 | 0.639 | 0.654 | 0.664 | 0.675 | 0.681 | 0.68  |
| Georgia                   | 0.553 | 0.547 | 0.546 | 0.539 | 0.534 | 0.528 | 0.517 | 0.518 | 0.522 | 0.524 | 0.528 | 0.539 | 0.558 | 0.574 | 0.594 | 0.612 | 0.624 | 0.638 | 0.645 | 0.645 |
| Hawaii                    | 0.621 | 0.616 | 0.616 | 0.61  | 0.605 | 0.599 | 0.589 | 0.588 | 0.589 | 0.59  | 0.594 | 0.603 | 0.619 | 0.634 | 0.654 | 0.672 | 0.684 | 0.699 | 0.708 | 0.711 |
| Idaho                     | 0.588 | 0.579 | 0.577 | 0.567 | 0.558 | 0.547 | 0.532 | 0.53  | 0.53  | 0.528 | 0.53  | 0.54  | 0.56  | 0.578 | 0.602 | 0.624 | 0.638 | 0.654 | 0.663 | 0.665 |
| Illinois                  | 0.629 | 0.624 | 0.623 | 0.618 | 0.615 | 0.61  | 0.602 | 0.603 | 0.605 | 0.607 | 0.61  | 0.618 | 0.633 | 0.645 | 0.662 | 0.677 | 0.687 | 0.698 | 0.704 | 0.704 |
| Indiana                   | 0.608 | 0.603 | 0.602 | 0.596 | 0.591 | 0.585 | 0.575 | 0.575 | 0.577 | 0.577 | 0.58  | 0.588 | 0.604 | 0.617 | 0.636 | 0.652 | 0.663 | 0.674 | 0.681 | 0.681 |
| Iowa                      | 0.633 | 0.627 | 0.626 | 0.619 | 0.614 | 0.607 | 0.596 | 0.595 | 0.595 | 0.593 | 0.594 | 0.599 | 0.612 | 0.623 | 0.641 | 0.657 | 0.669 | 0.682 | 0.691 | 0.696 |
| Kansas                    | 0.625 | 0.619 | 0.619 | 0.613 | 0.608 | 0.601 | 0.59  | 0.588 | 0.589 | 0.588 | 0.589 | 0.596 | 0.61  | 0.623 | 0.641 | 0.658 | 0.67  | 0.684 | 0.693 | 0.698 |
| Kentucky                  | 0.551 | 0.546 | 0.546 | 0.539 | 0.534 | 0.528 | 0.518 | 0.519 | 0.522 | 0.524 | 0.527 | 0.537 | 0.555 | 0.571 | 0.59  | 0.608 | 0.62  | 0.633 | 0.641 | 0.642 |
| Louisiana                 | 0.545 | 0.537 | 0.535 | 0.527 | 0.519 | 0.51  | 0.496 | 0.495 | 0.496 | 0.495 | 0.497 | 0.505 | 0.524 | 0.541 | 0.564 | 0.584 | 0.599 | 0.616 | 0.628 | 0.633 |
| Maine                     | 0.6   | 0.593 | 0.592 | 0.585 | 0.579 | 0.573 | 0.562 | 0.561 | 0.562 | 0.561 | 0.563 | 0.571 | 0.587 | 0.601 | 0.62  | 0.638 | 0.65  | 0.663 | 0.671 | 0.673 |
| Maryland                  | 0.641 | 0.636 | 0.636 | 0.632 | 0.627 | 0.622 | 0.614 | 0.614 | 0.615 | 0.615 | 0.617 | 0.623 | 0.636 | 0.647 | 0.663 | 0.678 | 0.689 | 0.702 | 0.711 | 0.717 |
| Massachusetts             | 0.676 | 0.673 | 0.673 | 0.67  | 0.668 | 0.665 | 0.66  | 0.66  | 0.661 | 0.662 | 0.664 | 0.67  | 0.679 | 0.688 | 0.701 | 0.713 | 0.721 | 0.731 | 0.738 | 0.742 |
| Michigan                  | 0.627 | 0.622 | 0.621 | 0.616 | 0.612 | 0.607 | 0.597 | 0.597 | 0.597 | 0.597 | 0.598 | 0.604 | 0.617 | 0.629 | 0.646 | 0.662 | 0.672 | 0.684 | 0.691 | 0.693 |
| Minnesota                 | 0.645 | 0.641 | 0.64  | 0.635 | 0.632 | 0.627 | 0.62  | 0.619 | 0.619 | 0.619 | 0.62  | 0.626 | 0.637 | 0.648 | 0.663 | 0.678 | 0.689 | 0.702 | 0.711 | 0.717 |
| Mississippi               | 0.51  | 0.5   | 0.498 | 0.488 | 0.48  | 0.471 | 0.456 | 0.455 | 0.457 | 0.458 | 0.462 | 0.474 | 0.497 | 0.516 | 0.541 | 0.562 | 0.576 | 0.592 | 0.602 | 0.602 |
| Missouri                  | 0.601 | 0.595 | 0.594 | 0.588 | 0.584 | 0.578 | 0.569 | 0.569 | 0.571 | 0.572 | 0.574 | 0.582 | 0.598 | 0.612 | 0.63  | 0.647 | 0.658 | 0.671 | 0.68  | 0.683 |
| Montana                   | 0.621 | 0.614 | 0.611 | 0.604 | 0.597 | 0.59  | 0.578 | 0.577 | 0.578 | 0.577 | 0.579 | 0.587 | 0.603 | 0.618 | 0.637 | 0.655 | 0.667 | 0.68  | 0.687 | 0.687 |
| Nebraska                  | 0.634 | 0.626 | 0.625 | 0.618 | 0.613 | 0.607 | 0.596 | 0.596 | 0.597 | 0.596 | 0.598 | 0.605 | 0.619 | 0.632 | 0.649 | 0.666 | 0.677 | 0.69  | 0.698 | 0.701 |
| Nevada                    | 0.627 | 0.619 | 0.618 | 0.611 | 0.604 | 0.597 | 0.583 | 0     |       |       |       |       |       |       |       |       |       |       |       |       |

**Appendix Table 8. Socio-Demographic Index values for all estimated GBD 2017 locations, 1950-1969**

| Location                | 1950  | 1951  | 1952  | 1953  | 1954  | 1955  | 1956  | 1957  | 1958  | 1959  | 1960  | 1961  | 1962  | 1963  | 1964  | 1965  | 1966  | 1967  | 1968  | 1969  |
|-------------------------|-------|-------|-------|-------|-------|-------|-------|-------|-------|-------|-------|-------|-------|-------|-------|-------|-------|-------|-------|-------|
| Oklahoma                | 0.575 | 0.569 | 0.568 | 0.561 | 0.556 | 0.549 | 0.538 | 0.538 | 0.541 | 0.542 | 0.545 | 0.556 | 0.574 | 0.59  | 0.611 | 0.629 | 0.641 | 0.655 | 0.664 | 0.666 |
| Oregon                  | 0.645 | 0.639 | 0.638 | 0.632 | 0.627 | 0.621 | 0.611 | 0.609 | 0.609 | 0.608 | 0.609 | 0.615 | 0.628 | 0.639 | 0.657 | 0.673 | 0.684 | 0.698 | 0.707 | 0.712 |
| Pennsylvania            | 0.636 | 0.632 | 0.632 | 0.629 | 0.626 | 0.622 | 0.617 | 0.618 | 0.621 | 0.622 | 0.626 | 0.633 | 0.645 | 0.656 | 0.67  | 0.683 | 0.691 | 0.701 | 0.706 | 0.706 |
| Rhode Island            | 0.642 | 0.638 | 0.637 | 0.633 | 0.629 | 0.625 | 0.617 | 0.617 | 0.617 | 0.617 | 0.618 | 0.624 | 0.635 | 0.646 | 0.661 | 0.675 | 0.686 | 0.698 | 0.706 | 0.71  |
| South Carolina          | 0.545 | 0.54  | 0.54  | 0.533 | 0.526 | 0.518 | 0.506 | 0.505 | 0.508 | 0.509 | 0.512 | 0.523 | 0.542 | 0.558 | 0.58  | 0.599 | 0.613 | 0.628 | 0.637 | 0.639 |
| South Dakota            | 0.601 | 0.596 | 0.592 | 0.584 | 0.579 | 0.57  | 0.559 | 0.559 | 0.559 | 0.562 | 0.571 | 0.588 | 0.603 | 0.622 | 0.641 | 0.653 | 0.667 | 0.676 | 0.678 |       |
| Tennessee               | 0.563 | 0.557 | 0.556 | 0.55  | 0.545 | 0.54  | 0.53  | 0.531 | 0.534 | 0.536 | 0.539 | 0.549 | 0.566 | 0.58  | 0.599 | 0.616 | 0.628 | 0.642 | 0.651 | 0.653 |
| Texas                   | 0.572 | 0.565 | 0.564 | 0.555 | 0.549 | 0.541 | 0.528 | 0.528 | 0.53  | 0.53  | 0.532 | 0.542 | 0.56  | 0.576 | 0.597 | 0.616 | 0.629 | 0.643 | 0.652 | 0.655 |
| Utah                    | 0.608 | 0.6   | 0.598 | 0.589 | 0.581 | 0.573 | 0.56  | 0.559 | 0.56  | 0.559 | 0.563 | 0.574 | 0.593 | 0.61  | 0.634 | 0.654 | 0.667 | 0.682 | 0.69  | 0.689 |
| Vermont                 | 0.627 | 0.623 | 0.622 | 0.617 | 0.612 | 0.607 | 0.598 | 0.598 | 0.598 | 0.598 | 0.6   | 0.607 | 0.62  | 0.631 | 0.648 | 0.664 | 0.675 | 0.688 | 0.697 | 0.7   |
| Virginia                | 0.607 | 0.603 | 0.603 | 0.597 | 0.593 | 0.588 | 0.579 | 0.58  | 0.582 | 0.583 | 0.586 | 0.594 | 0.609 | 0.622 | 0.64  | 0.656 | 0.667 | 0.68  | 0.689 | 0.692 |
| Washington              | 0.655 | 0.648 | 0.647 | 0.641 | 0.636 | 0.629 | 0.618 | 0.616 | 0.615 | 0.613 | 0.612 | 0.617 | 0.629 | 0.64  | 0.657 | 0.673 | 0.684 | 0.699 | 0.71  | 0.718 |
| West Virginia           | 0.569 | 0.563 | 0.562 | 0.555 | 0.55  | 0.544 | 0.534 | 0.535 | 0.538 | 0.54  | 0.544 | 0.553 | 0.569 | 0.584 | 0.603 | 0.62  | 0.631 | 0.644 | 0.651 | 0.65  |
| Wisconsin               | 0.638 | 0.634 | 0.634 | 0.629 | 0.624 | 0.619 | 0.612 | 0.611 | 0.612 | 0.611 | 0.613 | 0.619 | 0.63  | 0.64  | 0.656 | 0.671 | 0.681 | 0.693 | 0.701 | 0.705 |
| Wyoming                 | 0.609 | 0.6   | 0.597 | 0.587 | 0.578 | 0.569 | 0.554 | 0.552 | 0.552 | 0.55  | 0.551 | 0.56  | 0.579 | 0.596 | 0.619 | 0.639 | 0.651 | 0.666 | 0.676 | 0.678 |
| Southern Latin America  | 0.464 | 0.468 | 0.47  | 0.472 | 0.474 | 0.475 | 0.477 | 0.481 | 0.485 | 0.486 | 0.489 | 0.492 | 0.494 | 0.496 | 0.501 | 0.507 | 0.513 | 0.517 | 0.516 | 0.517 |
| Argentina               | 0.472 | 0.475 | 0.477 | 0.479 | 0.482 | 0.485 | 0.488 | 0.492 | 0.497 | 0.501 | 0.504 | 0.506 | 0.508 | 0.51  | 0.515 | 0.521 | 0.527 | 0.53  | 0.525 | 0.524 |
| Chile                   | 0.436 | 0.441 | 0.443 | 0.445 | 0.446 | 0.445 | 0.443 | 0.446 | 0.449 | 0.446 | 0.448 | 0.455 | 0.456 | 0.458 | 0.464 | 0.471 | 0.477 | 0.485 | 0.494 | 0.498 |
| Uruguay                 | 0.479 | 0.484 | 0.484 | 0.484 | 0.484 | 0.483 | 0.484 | 0.487 | 0.489 | 0.49  | 0.49  | 0.491 | 0.495 | 0.5   | 0.504 | 0.507 | 0.511 | 0.514 | 0.514 | 0.515 |
| Western Europe          | 0.597 | 0.6   | 0.602 | 0.605 | 0.607 | 0.609 | 0.61  | 0.612 | 0.613 | 0.614 | 0.615 | 0.616 | 0.617 | 0.619 | 0.622 | 0.624 | 0.629 | 0.634 | 0.637 | 0.643 |
| Andorra                 | 0.721 | 0.724 | 0.728 | 0.733 | 0.737 | 0.741 | 0.745 | 0.75  | 0.754 | 0.758 | 0.762 | 0.767 | 0.771 | 0.776 | 0.781 | 0.786 | 0.79  | 0.794 | 0.798 | 0.801 |
| Austria                 | 0.651 | 0.654 | 0.654 | 0.656 | 0.656 | 0.655 | 0.654 | 0.653 | 0.652 | 0.647 | 0.645 | 0.649 | 0.652 | 0.655 | 0.658 | 0.659 | 0.658 | 0.657 | 0.659 | 0.665 |
| Belgium                 | 0.657 | 0.659 | 0.66  | 0.66  | 0.66  | 0.66  | 0.66  | 0.66  | 0.66  | 0.66  | 0.66  | 0.66  | 0.66  | 0.661 | 0.665 | 0.67  | 0.676 | 0.682 | 0.686 | 0.689 |
| Cyprus                  | 0.544 | 0.55  | 0.556 | 0.561 | 0.563 | 0.562 | 0.561 | 0.561 | 0.562 | 0.564 | 0.567 | 0.571 | 0.575 | 0.579 | 0.581 | 0.584 | 0.587 | 0.591 | 0.595 | 0.6   |
| Denmark                 | 0.693 | 0.692 | 0.689 | 0.688 | 0.688 | 0.688 | 0.689 | 0.691 | 0.694 | 0.697 | 0.7   | 0.701 | 0.702 | 0.704 | 0.705 | 0.706 | 0.714 | 0.73  | 0.744 | 0.753 |
| Finland                 | 0.633 | 0.637 | 0.637 | 0.637 | 0.638 | 0.64  | 0.643 | 0.648 | 0.652 | 0.653 | 0.656 | 0.658 | 0.659 | 0.663 | 0.671 | 0.678 | 0.682 | 0.688 | 0.697 | 0.707 |
| France                  | 0.561 | 0.564 | 0.567 | 0.569 | 0.571 | 0.574 | 0.577 | 0.58  | 0.58  | 0.581 | 0.582 | 0.584 | 0.583 | 0.582 | 0.585 | 0.589 | 0.595 | 0.603 | 0.61  | 0.615 |
| Germany                 | 0.615 | 0.62  | 0.623 | 0.631 | 0.638 | 0.642 | 0.644 | 0.647 | 0.648 | 0.649 | 0.65  | 0.651 | 0.652 | 0.655 | 0.659 | 0.662 | 0.667 | 0.674 | 0.672 | 0.68  |
| Greece                  | 0.55  | 0.553 | 0.554 | 0.556 | 0.559 | 0.563 | 0.568 | 0.571 | 0.572 | 0.574 | 0.578 | 0.581 | 0.582 | 0.583 | 0.583 | 0.582 | 0.579 | 0.576 | 0.58  | 0.588 |
| Iceland                 | 0.629 | 0.627 | 0.623 | 0.62  | 0.618 | 0.617 | 0.617 | 0.62  | 0.627 | 0.635 | 0.636 | 0.632 | 0.629 | 0.628 | 0.631 | 0.639 | 0.651 | 0.664 | 0.674 | 0.68  |
| Ireland                 | 0.609 | 0.611 | 0.615 | 0.62  | 0.623 | 0.626 | 0.628 | 0.629 | 0.629 | 0.629 | 0.629 | 0.628 | 0.628 | 0.629 | 0.631 | 0.634 | 0.637 | 0.639 | 0.641 | 0.641 |
| Israel                  | 0.525 | 0.526 | 0.527 | 0.531 | 0.533 | 0.536 | 0.542 | 0.551 | 0.561 | 0.566 | 0.571 | 0.578 | 0.583 | 0.587 | 0.592 | 0.6   | 0.61  | 0.619 | 0.623 | 0.624 |
| Italy                   | 0.578 | 0.583 | 0.587 | 0.588 | 0.59  | 0.592 | 0.595 | 0.598 | 0.601 | 0.604 | 0.607 | 0.609 | 0.611 | 0.617 | 0.619 | 0.617 | 0.621 | 0.625 | 0.629 | 0.633 |
| Luxembourg              | 0.706 | 0.71  | 0.712 | 0.711 | 0.71  | 0.709 | 0.71  | 0.71  | 0.711 | 0.712 | 0.713 | 0.714 | 0.715 | 0.715 | 0.717 | 0.719 | 0.721 | 0.725 | 0.729 | 0.735 |
| Malta                   | 0.494 | 0.501 | 0.508 | 0.515 | 0.522 | 0.526 | 0.53  | 0.532 | 0.534 | 0.536 | 0.542 | 0.55  | 0.56  | 0.571 | 0.583 | 0.594 | 0.602 | 0.608 | 0.613 | 0.618 |
| Netherlands             | 0.683 | 0.683 | 0.685 | 0.688 | 0.689 | 0.691 | 0.692 | 0.692 | 0.691 | 0.691 | 0.692 | 0.692 | 0.692 | 0.692 | 0.694 | 0.696 | 0.698 | 0.702 | 0.705 | 0.71  |
| Norway                  | 0.684 | 0.684 | 0.68  | 0.677 | 0.674 | 0.672 | 0.67  | 0.67  | 0.67  | 0.67  | 0.668 | 0.667 | 0.668 | 0.669 | 0.67  | 0.673 | 0.675 | 0.677 | 0.68  | 0.684 |
| Portugal                | 0.454 | 0.456 | 0.458 | 0.461 | 0.462 | 0.463 | 0.464 | 0.466 | 0.467 | 0.468 | 0.469 | 0.47  | 0.474 | 0.478 | 0.481 | 0.485 | 0.488 | 0.493 | 0.5   | 0.507 |
| Spain                   | 0.533 | 0.536 | 0.537 | 0.537 | 0.537 | 0.537 | 0.537 | 0.538 | 0.54  | 0.543 | 0.547 | 0.55  | 0.553 | 0.555 | 0.558 | 0.563 | 0.568 | 0.57  | 0.572 | 0.577 |
| Sweden                  | 0.645 | 0.647 | 0.647 | 0.648 | 0.649 | 0.65  | 0.652 | 0.656 | 0.66  | 0.664 | 0.668 | 0.669 | 0.67  | 0.669 | 0.67  | 0.673 | 0.678 | 0.687 | 0.697 | 0.702 |
| Stockholm               | 0.697 | 0.699 | 0.699 | 0.701 | 0.702 | 0.703 | 0.706 | 0.71  | 0.714 | 0.719 | 0.722 | 0.724 | 0.726 | 0.726 | 0.728 | 0.73  | 0.734 | 0.741 | 0.748 | 0.75  |
| Sweden except Stockholm | 0.634 | 0.636 | 0.636 | 0.637 | 0.638 | 0.638 | 0.64  | 0.644 | 0.648 | 0.652 | 0.655 | 0.657 | 0.657 | 0.656 | 0.656 | 0.659 | 0.664 | 0.674 | 0.684 | 0.69  |
| Switzerland             | 0.761 | 0.765 | 0.766 | 0.767 | 0.768 | 0.768 | 0.768 | 0.768 | 0.768 | 0.769 | 0.768 | 0.766 | 0.763 | 0.761 | 0.763 | 0.767 | 0.771 | 0.774 | 0.778 | 0.781 |
| United Kingdom          | 0.572 | 0.574 | 0.575 | 0.576 | 0.576 | 0.576 | 0.575 | 0.574 | 0.573 | 0.571 | 0.57  | 0.569 | 0.568 | 0.569 | 0.572 | 0.576 | 0.581 | 0.587 | 0.593 | 0.599 |
| England                 | 0.587 | 0.589 | 0.59  | 0.591 | 0.592 | 0.591 | 0.59  | 0.588 | 0.587 | 0.585 | 0.584 | 0.582 | 0.582 | 0.582 | 0.585 | 0.589 | 0.594 | 0.6   | 0.606 | 0.611 |
| East Midlands           | 0.552 | 0.555 | 0.556 | 0.557 | 0.558 | 0.558 | 0.557 | 0.556 | 0.555 | 0.554 | 0.553 | 0.552 | 0.551 | 0.553 | 0.555 | 0.56  | 0.565 | 0.571 | 0.577 | 0.583 |
| Derby                   | 0.559 | 0.561 | 0.562 | 0.563 | 0.564 | 0.563 | 0.562 | 0.561 | 0.559 | 0.557 | 0.556 | 0.554 | 0.553 | 0.554 | 0.557 | 0.561 | 0.566 | 0.572 | 0.578 | 0.584 |
| Derbyshire              | 0.542 | 0.545 | 0.546 | 0.547 | 0.548 | 0.548 | 0.547 | 0.546 | 0.545 | 0.544 | 0.543 | 0.542 | 0.542 | 0.543 | 0.546 | 0.55  | 0.556 | 0.562 | 0.568 | 0.574 |
| Leicester               | 0.54  | 0.542 | 0.543 | 0.545 | 0.545 | 0.545 | 0.544 | 0.543 | 0.542 | 0.541 | 0.539 | 0.538 | 0.538 | 0.539 | 0.542 | 0.546 | 0.552 | 0.558 | 0.564 | 0.57  |
| Leicestershire          | 0.57  | 0.572 | 0.573 | 0.574 | 0.575 | 0.575 | 0.575 | 0.574 | 0.573 | 0.572 | 0.571 | 0.571 | 0.571 | 0.572 | 0.575 | 0.579 | 0.585 | 0.591 | 0.597 | 0.603 |
| Lincolnshire            | 0.546 | 0.548 | 0.549 | 0.55  | 0.551 | 0.551 | 0.55  | 0.549 | 0.548 | 0.547 | 0.546 | 0.545 | 0.545 | 0.546 | 0.549 | 0.553 | 0.558 | 0.564 | 0.571 | 0.577 |
| Northamptonshire        | 0.555 | 0.557 | 0.558 | 0.559 | 0.56  | 0.56  | 0.559 | 0.558 | 0.557 | 0.556 | 0.554 | 0.553 | 0.553 | 0.554 | 0.557 | 0.561 | 0.567 | 0.573 | 0.579 | 0.585 |
| Nottingham              | 0.568 | 0.57  | 0.571 | 0.572 | 0.573 | 0.573 | 0.572 | 0.572 | 0.571 | 0.57  | 0.569 | 0.568 | 0.568 | 0.569 | 0.572 | 0.577 | 0.582 | 0.588 | 0.594 | 0.6   |
| Nottinghamshire         | 0.541 | 0.543 | 0.544 | 0.546 | 0.546 | 0.546 | 0.546 | 0.545 | 0.544 | 0.543 | 0.541 | 0.541 | 0.541 | 0.542 | 0.545 | 0.549 | 0.554 | 0.56  | 0.566 | 0.572 |
| Rutland                 | 0.57  | 0.573 | 0.574 | 0.575 | 0.576 | 0.576 | 0.575 | 0.574 | 0.573 | 0.572 | 0.571 | 0.57  | 0.57  | 0.571 | 0.574 | 0.579 | 0.584 | 0.59  | 0.596 | 0.602 |
| East of England         | 0.567 | 0.57  | 0.571 | 0.572 | 0.573 | 0.573 | 0.572 | 0.572 | 0.571 | 0.57  | 0.568 | 0.568 | 0.568 | 0.569 | 0.572 | 0.576 | 0.581 | 0.587 | 0.594 | 0.6   |
| Bedford                 | 0.57  | 0.573 | 0.574 | 0.575 | 0.576 | 0.576 | 0.575 | 0.574 | 0.573 | 0.572 | 0.571 | 0.57  | 0.569 | 0.571 | 0.573 | 0.578 | 0.583 | 0.589 | 0.595 | 0.601 |
| Cambridgeshire          | 0.589 | 0.592 | 0.593 | 0.594 | 0.595 | 0.595 | 0.595 | 0.594 | 0.594 | 0.593 | 0.593 | 0.592 |       |       |       |       |       |       |       |       |

**Appendix Table 8. Socio-Demographic Index values for all estimated GBD 2017 locations, 1950-1969**

| Location                  | 1950  | 1951  | 1952  | 1953  | 1954  | 1955  | 1956  | 1957  | 1958  | 1959  | 1960  | 1961  | 1962  | 1963  | 1964  | 1965  | 1966  | 1967  | 1968  | 1969  |
|---------------------------|-------|-------|-------|-------|-------|-------|-------|-------|-------|-------|-------|-------|-------|-------|-------|-------|-------|-------|-------|-------|
| Suffolk                   | 0.556 | 0.559 | 0.56  | 0.561 | 0.562 | 0.562 | 0.561 | 0.56  | 0.559 | 0.557 | 0.556 | 0.555 | 0.554 | 0.555 | 0.558 | 0.562 | 0.568 | 0.574 | 0.58  | 0.586 |
| Thurrock                  | 0.56  | 0.562 | 0.563 | 0.564 | 0.564 | 0.564 | 0.563 | 0.562 | 0.561 | 0.559 | 0.558 | 0.557 | 0.556 | 0.557 | 0.56  | 0.564 | 0.57  | 0.576 | 0.582 | 0.588 |
| Greater London            | 0.635 | 0.638 | 0.639 | 0.639 | 0.64  | 0.64  | 0.638 | 0.637 | 0.636 | 0.634 | 0.633 | 0.631 | 0.631 | 0.632 | 0.634 | 0.638 | 0.643 | 0.648 | 0.653 | 0.659 |
| Barking and Dagenham      | 0.564 | 0.566 | 0.567 | 0.567 | 0.568 | 0.567 | 0.566 | 0.565 | 0.563 | 0.561 | 0.559 | 0.558 | 0.557 | 0.557 | 0.56  | 0.564 | 0.568 | 0.574 | 0.58  | 0.586 |
| Barnet                    | 0.609 | 0.611 | 0.612 | 0.613 | 0.614 | 0.614 | 0.613 | 0.613 | 0.612 | 0.611 | 0.61  | 0.609 | 0.609 | 0.61  | 0.612 | 0.616 | 0.621 | 0.626 | 0.632 | 0.637 |
| Bexley                    | 0.574 | 0.577 | 0.578 | 0.579 | 0.58  | 0.58  | 0.579 | 0.578 | 0.577 | 0.576 | 0.575 | 0.575 | 0.574 | 0.575 | 0.578 | 0.582 | 0.587 | 0.593 | 0.598 | 0.604 |
| Brent                     | 0.597 | 0.599 | 0.6   | 0.601 | 0.602 | 0.602 | 0.601 | 0.6   | 0.599 | 0.597 | 0.596 | 0.595 | 0.594 | 0.595 | 0.598 | 0.602 | 0.607 | 0.613 | 0.618 | 0.624 |
| Bromley                   | 0.606 | 0.608 | 0.609 | 0.611 | 0.611 | 0.611 | 0.611 | 0.61  | 0.609 | 0.608 | 0.607 | 0.606 | 0.606 | 0.607 | 0.609 | 0.613 | 0.618 | 0.624 | 0.629 | 0.635 |
| Camden                    | 0.709 | 0.712 | 0.713 | 0.714 | 0.715 | 0.715 | 0.715 | 0.715 | 0.714 | 0.714 | 0.714 | 0.713 | 0.714 | 0.715 | 0.718 | 0.722 | 0.726 | 0.731 | 0.735 | 0.739 |
| Croydon                   | 0.591 | 0.593 | 0.594 | 0.596 | 0.596 | 0.596 | 0.595 | 0.594 | 0.592 | 0.591 | 0.589 | 0.588 | 0.588 | 0.588 | 0.591 | 0.595 | 0.6   | 0.606 | 0.612 | 0.618 |
| Ealing                    | 0.609 | 0.611 | 0.612 | 0.613 | 0.614 | 0.614 | 0.613 | 0.611 | 0.61  | 0.609 | 0.607 | 0.606 | 0.605 | 0.606 | 0.608 | 0.612 | 0.617 | 0.623 | 0.628 | 0.634 |
| Enfield                   | 0.585 | 0.588 | 0.589 | 0.59  | 0.591 | 0.591 | 0.59  | 0.589 | 0.588 | 0.587 | 0.585 | 0.584 | 0.584 | 0.585 | 0.587 | 0.591 | 0.596 | 0.602 | 0.608 | 0.614 |
| Greenwich                 | 0.577 | 0.579 | 0.58  | 0.581 | 0.581 | 0.581 | 0.58  | 0.579 | 0.577 | 0.576 | 0.574 | 0.573 | 0.572 | 0.573 | 0.575 | 0.579 | 0.584 | 0.59  | 0.595 | 0.601 |
| Hackney                   | 0.65  | 0.652 | 0.652 | 0.652 | 0.651 | 0.649 | 0.645 | 0.642 | 0.638 | 0.634 | 0.629 | 0.625 | 0.622 | 0.62  | 0.621 | 0.624 | 0.629 | 0.635 | 0.641 | 0.647 |
| Hammersmith and Fulham    | 0.665 | 0.668 | 0.669 | 0.67  | 0.671 | 0.671 | 0.671 | 0.67  | 0.669 | 0.669 | 0.668 | 0.668 | 0.668 | 0.67  | 0.672 | 0.676 | 0.68  | 0.686 | 0.691 | 0.696 |
| Haringey                  | 0.597 | 0.599 | 0.6   | 0.602 | 0.603 | 0.602 | 0.602 | 0.601 | 0.6   | 0.598 | 0.597 | 0.596 | 0.596 | 0.597 | 0.599 | 0.603 | 0.608 | 0.614 | 0.62  | 0.626 |
| Harrow                    | 0.597 | 0.599 | 0.6   | 0.602 | 0.602 | 0.602 | 0.602 | 0.601 | 0.6   | 0.598 | 0.597 | 0.596 | 0.596 | 0.597 | 0.599 | 0.603 | 0.608 | 0.614 | 0.62  | 0.625 |
| Havering                  | 0.579 | 0.581 | 0.582 | 0.584 | 0.584 | 0.584 | 0.583 | 0.582 | 0.582 | 0.58  | 0.579 | 0.579 | 0.578 | 0.579 | 0.582 | 0.586 | 0.591 | 0.596 | 0.602 | 0.607 |
| Hillingdon                | 0.631 | 0.634 | 0.635 | 0.636 | 0.637 | 0.636 | 0.635 | 0.634 | 0.633 | 0.632 | 0.63  | 0.629 | 0.629 | 0.63  | 0.632 | 0.636 | 0.641 | 0.647 | 0.653 | 0.658 |
| Hounslow                  | 0.615 | 0.617 | 0.619 | 0.62  | 0.62  | 0.62  | 0.619 | 0.618 | 0.616 | 0.615 | 0.613 | 0.612 | 0.612 | 0.612 | 0.615 | 0.619 | 0.624 | 0.63  | 0.636 | 0.641 |
| Islington                 | 0.669 | 0.672 | 0.673 | 0.674 | 0.674 | 0.674 | 0.673 | 0.671 | 0.67  | 0.669 | 0.668 | 0.667 | 0.666 | 0.667 | 0.67  | 0.673 | 0.678 | 0.684 | 0.69  | 0.695 |
| Kensington and Chelsea    | 0.688 | 0.69  | 0.691 | 0.693 | 0.694 | 0.694 | 0.695 | 0.695 | 0.695 | 0.695 | 0.695 | 0.695 | 0.696 | 0.698 | 0.7   | 0.704 | 0.708 | 0.713 | 0.719 | 0.724 |
| Kingston upon Thames      | 0.637 | 0.639 | 0.641 | 0.642 | 0.643 | 0.643 | 0.643 | 0.643 | 0.642 | 0.642 | 0.642 | 0.641 | 0.642 | 0.643 | 0.646 | 0.649 | 0.654 | 0.659 | 0.664 | 0.669 |
| Lambeth                   | 0.616 | 0.618 | 0.619 | 0.62  | 0.621 | 0.62  | 0.619 | 0.617 | 0.616 | 0.614 | 0.613 | 0.611 | 0.611 | 0.612 | 0.614 | 0.618 | 0.623 | 0.628 | 0.634 | 0.64  |
| Lewisham                  | 0.579 | 0.581 | 0.582 | 0.583 | 0.584 | 0.584 | 0.583 | 0.582 | 0.581 | 0.579 | 0.578 | 0.577 | 0.577 | 0.578 | 0.58  | 0.584 | 0.589 | 0.594 | 0.6   | 0.605 |
| Merton                    | 0.607 | 0.609 | 0.61  | 0.611 | 0.612 | 0.612 | 0.61  | 0.609 | 0.608 | 0.607 | 0.605 | 0.604 | 0.604 | 0.605 | 0.607 | 0.611 | 0.616 | 0.621 | 0.627 | 0.633 |
| Newham                    | 0.564 | 0.566 | 0.567 | 0.567 | 0.568 | 0.567 | 0.565 | 0.564 | 0.562 | 0.56  | 0.557 | 0.555 | 0.554 | 0.555 | 0.557 | 0.561 | 0.567 | 0.573 | 0.579 | 0.585 |
| Redbridge                 | 0.581 | 0.583 | 0.584 | 0.585 | 0.586 | 0.586 | 0.585 | 0.584 | 0.583 | 0.582 | 0.581 | 0.58  | 0.58  | 0.581 | 0.583 | 0.587 | 0.592 | 0.597 | 0.603 | 0.609 |
| Richmond upon Thames      | 0.648 | 0.65  | 0.651 | 0.653 | 0.653 | 0.654 | 0.653 | 0.653 | 0.652 | 0.651 | 0.651 | 0.651 | 0.651 | 0.652 | 0.654 | 0.658 | 0.662 | 0.667 | 0.673 | 0.678 |
| Southwark                 | 0.637 | 0.639 | 0.64  | 0.64  | 0.641 | 0.64  | 0.638 | 0.637 | 0.635 | 0.633 | 0.631 | 0.63  | 0.629 | 0.629 | 0.631 | 0.635 | 0.64  | 0.646 | 0.652 | 0.657 |
| Sutton                    | 0.584 | 0.587 | 0.588 | 0.589 | 0.59  | 0.59  | 0.589 | 0.589 | 0.588 | 0.587 | 0.585 | 0.585 | 0.584 | 0.586 | 0.588 | 0.592 | 0.597 | 0.603 | 0.609 | 0.615 |
| Tower Hamlets             | 0.636 | 0.638 | 0.639 | 0.639 | 0.638 | 0.637 | 0.634 | 0.631 | 0.628 | 0.625 | 0.621 | 0.618 | 0.615 | 0.614 | 0.615 | 0.618 | 0.622 | 0.628 | 0.633 | 0.639 |
| Waltham Forest            | 0.558 | 0.56  | 0.561 | 0.563 | 0.563 | 0.563 | 0.562 | 0.561 | 0.56  | 0.559 | 0.557 | 0.556 | 0.555 | 0.556 | 0.559 | 0.562 | 0.568 | 0.573 | 0.579 | 0.585 |
| Wandsworth                | 0.634 | 0.636 | 0.637 | 0.639 | 0.639 | 0.639 | 0.638 | 0.638 | 0.637 | 0.636 | 0.635 | 0.634 | 0.634 | 0.635 | 0.637 | 0.641 | 0.645 | 0.651 | 0.656 | 0.661 |
| Westminster               | 0.72  | 0.722 | 0.723 | 0.723 | 0.723 | 0.722 | 0.721 | 0.72  | 0.718 | 0.717 | 0.715 | 0.714 | 0.713 | 0.714 | 0.715 | 0.718 | 0.721 | 0.725 | 0.73  | 0.734 |
| North East England        | 0.536 | 0.538 | 0.539 | 0.541 | 0.542 | 0.542 | 0.541 | 0.539 | 0.538 | 0.537 | 0.535 | 0.534 | 0.534 | 0.535 | 0.538 | 0.542 | 0.548 | 0.554 | 0.56  | 0.566 |
| County Durham             | 0.529 | 0.531 | 0.533 | 0.534 | 0.535 | 0.535 | 0.534 | 0.533 | 0.532 | 0.531 | 0.53  | 0.529 | 0.529 | 0.53  | 0.533 | 0.537 | 0.543 | 0.549 | 0.556 | 0.561 |
| Darlington                | 0.547 | 0.55  | 0.55  | 0.552 | 0.552 | 0.552 | 0.551 | 0.55  | 0.548 | 0.546 | 0.545 | 0.543 | 0.542 | 0.543 | 0.546 | 0.55  | 0.556 | 0.563 | 0.569 | 0.576 |
| Gateshead                 | 0.542 | 0.544 | 0.545 | 0.546 | 0.547 | 0.547 | 0.546 | 0.545 | 0.543 | 0.541 | 0.54  | 0.539 | 0.538 | 0.539 | 0.542 | 0.546 | 0.551 | 0.558 | 0.564 | 0.57  |
| Hartlepool                | 0.522 | 0.524 | 0.525 | 0.527 | 0.527 | 0.527 | 0.525 | 0.524 | 0.522 | 0.52  | 0.518 | 0.516 | 0.515 | 0.516 | 0.519 | 0.523 | 0.529 | 0.535 | 0.542 | 0.548 |
| Middlesbrough             | 0.526 | 0.528 | 0.529 | 0.53  | 0.531 | 0.531 | 0.529 | 0.528 | 0.526 | 0.524 | 0.522 | 0.521 | 0.52  | 0.521 | 0.523 | 0.528 | 0.534 | 0.54  | 0.547 | 0.553 |
| Newcastle upon Tyne       | 0.566 | 0.569 | 0.57  | 0.571 | 0.572 | 0.573 | 0.572 | 0.572 | 0.571 | 0.571 | 0.57  | 0.57  | 0.57  | 0.572 | 0.575 | 0.579 | 0.585 | 0.591 | 0.597 | 0.603 |
| North Tyneside            | 0.539 | 0.541 | 0.542 | 0.544 | 0.545 | 0.544 | 0.543 | 0.542 | 0.54  | 0.54  | 0.538 | 0.537 | 0.537 | 0.538 | 0.541 | 0.545 | 0.55  | 0.557 | 0.563 | 0.569 |
| Northumberland            | 0.535 | 0.538 | 0.539 | 0.54  | 0.541 | 0.541 | 0.541 | 0.539 | 0.538 | 0.537 | 0.536 | 0.534 | 0.534 | 0.535 | 0.538 | 0.542 | 0.548 | 0.554 | 0.561 | 0.567 |
| Redcar and Cleveland      | 0.513 | 0.516 | 0.517 | 0.518 | 0.519 | 0.518 | 0.517 | 0.516 | 0.514 | 0.513 | 0.511 | 0.51  | 0.509 | 0.509 | 0.512 | 0.517 | 0.522 | 0.529 | 0.535 | 0.541 |
| South Tyneside            | 0.507 | 0.509 | 0.51  | 0.512 | 0.513 | 0.512 | 0.511 | 0.51  | 0.509 | 0.508 | 0.506 | 0.505 | 0.505 | 0.506 | 0.509 | 0.513 | 0.519 | 0.525 | 0.531 | 0.538 |
| Stockton-on-Tees          | 0.546 | 0.549 | 0.55  | 0.551 | 0.551 | 0.551 | 0.55  | 0.548 | 0.547 | 0.545 | 0.543 | 0.541 | 0.54  | 0.541 | 0.544 | 0.548 | 0.554 | 0.56  | 0.567 | 0.573 |
| Sunderland                | 0.528 | 0.53  | 0.531 | 0.532 | 0.533 | 0.533 | 0.532 | 0.53  | 0.529 | 0.527 | 0.525 | 0.524 | 0.523 | 0.523 | 0.526 | 0.531 | 0.536 | 0.543 | 0.549 | 0.556 |
| North West England        | 0.567 | 0.57  | 0.571 | 0.572 | 0.572 | 0.572 | 0.571 | 0.57  | 0.568 | 0.567 | 0.565 | 0.564 | 0.563 | 0.564 | 0.567 | 0.571 | 0.576 | 0.582 | 0.588 | 0.594 |
| Blackburn with Darwen     | 0.539 | 0.541 | 0.542 | 0.544 | 0.544 | 0.543 | 0.542 | 0.54  | 0.538 | 0.536 | 0.533 | 0.531 | 0.53  | 0.53  | 0.533 | 0.537 | 0.542 | 0.549 | 0.555 | 0.562 |
| Blackpool                 | 0.53  | 0.532 | 0.534 | 0.535 | 0.536 | 0.536 | 0.535 | 0.534 | 0.533 | 0.532 | 0.531 | 0.53  | 0.53  | 0.531 | 0.534 | 0.538 | 0.544 | 0.55  | 0.556 | 0.562 |
| Bolton                    | 0.551 | 0.553 | 0.554 | 0.555 | 0.556 | 0.556 | 0.554 | 0.553 | 0.551 | 0.549 | 0.548 | 0.546 | 0.545 | 0.546 | 0.548 | 0.552 | 0.558 | 0.564 | 0.57  | 0.576 |
| Bury                      | 0.555 | 0.558 | 0.559 | 0.56  | 0.561 | 0.56  | 0.559 | 0.558 | 0.557 | 0.555 | 0.554 | 0.552 | 0.552 | 0.553 | 0.555 | 0.559 | 0.565 | 0.571 | 0.577 | 0.583 |
| Cheshire East             | 0.602 | 0.604 | 0.605 | 0.606 | 0.607 | 0.607 | 0.606 | 0.604 | 0.603 | 0.602 | 0.6   | 0.599 | 0.598 | 0.599 | 0.602 | 0.606 | 0.611 | 0.617 | 0.623 | 0.628 |
| Cheshire West and Chester | 0.594 | 0.596 | 0.597 | 0.598 | 0.599 | 0.598 | 0.597 | 0.596 | 0.594 | 0.593 | 0.591 | 0.59  | 0.589 | 0.59  | 0.592 | 0.596 | 0.602 | 0.607 | 0.613 | 0.619 |
| Cumbria                   | 0.572 | 0.575 | 0.576 | 0.577 | 0.578 | 0.578 | 0.576 | 0.575 | 0.574 | 0.572 | 0.571 | 0.569 | 0.569 | 0.57  | 0.573 | 0.577 | 0.582 | 0.588 | 0.594 | 0.6   |
| Halton                    | 0.557 | 0.559 | 0.56  | 0.561 | 0.562 | 0.561 | 0.559 | 0.557 | 0.556 | 0.553 | 0.551 | 0.549 | 0.548 | 0.549 | 0.551 | 0.555 | 0.561 | 0.567 | 0.573 | 0.579 |
| Knowsley                  | 0.547 | 0.549 | 0.55  | 0.551 | 0.551 | 0.55  |       |       |       |       |       |       |       |       |       |       |       |       |       |       |

**Appendix Table 8. Socio-Demographic Index values for all estimated GBD 2017 locations, 1950-1969**

| Location                     | 1950  | 1951  | 1952  | 1953  | 1954  | 1955  | 1956  | 1957  | 1958  | 1959  | 1960  | 1961  | 1962  | 1963  | 1964  | 1965  | 1966  | 1967  | 1968  | 1969  |
|------------------------------|-------|-------|-------|-------|-------|-------|-------|-------|-------|-------|-------|-------|-------|-------|-------|-------|-------|-------|-------|-------|
| St Helens                    | 0.539 | 0.541 | 0.542 | 0.543 | 0.544 | 0.543 | 0.542 | 0.541 | 0.54  | 0.538 | 0.537 | 0.535 | 0.535 | 0.535 | 0.538 | 0.542 | 0.547 | 0.553 | 0.559 | 0.565 |
| Stockport                    | 0.581 | 0.583 | 0.584 | 0.585 | 0.586 | 0.585 | 0.584 | 0.583 | 0.581 | 0.58  | 0.578 | 0.577 | 0.576 | 0.577 | 0.58  | 0.584 | 0.589 | 0.594 | 0.6   | 0.606 |
| Tameside                     | 0.544 | 0.547 | 0.547 | 0.549 | 0.549 | 0.549 | 0.548 | 0.546 | 0.545 | 0.543 | 0.542 | 0.54  | 0.539 | 0.54  | 0.543 | 0.547 | 0.552 | 0.558 | 0.564 | 0.57  |
| Trafford                     | 0.606 | 0.608 | 0.609 | 0.61  | 0.61  | 0.61  | 0.608 | 0.607 | 0.605 | 0.603 | 0.601 | 0.6   | 0.599 | 0.6   | 0.602 | 0.606 | 0.611 | 0.617 | 0.623 | 0.628 |
| Warrington                   | 0.593 | 0.596 | 0.596 | 0.597 | 0.598 | 0.597 | 0.596 | 0.594 | 0.592 | 0.59  | 0.588 | 0.587 | 0.586 | 0.586 | 0.589 | 0.593 | 0.598 | 0.604 | 0.61  | 0.616 |
| Wigan                        | 0.543 | 0.545 | 0.546 | 0.547 | 0.548 | 0.547 | 0.546 | 0.545 | 0.543 | 0.542 | 0.54  | 0.539 | 0.538 | 0.539 | 0.541 | 0.546 | 0.551 | 0.557 | 0.563 | 0.569 |
| Wirral                       | 0.549 | 0.551 | 0.552 | 0.553 | 0.554 | 0.553 | 0.552 | 0.551 | 0.549 | 0.547 | 0.546 | 0.544 | 0.544 | 0.544 | 0.547 | 0.551 | 0.556 | 0.562 | 0.568 | 0.574 |
| South East England           | 0.608 | 0.611 | 0.611 | 0.612 | 0.613 | 0.613 | 0.611 | 0.61  | 0.609 | 0.607 | 0.605 | 0.604 | 0.603 | 0.604 | 0.607 | 0.611 | 0.616 | 0.621 | 0.627 | 0.633 |
| Bracknell Forest             | 0.62  | 0.622 | 0.622 | 0.623 | 0.623 | 0.623 | 0.621 | 0.619 | 0.617 | 0.615 | 0.613 | 0.612 | 0.611 | 0.611 | 0.613 | 0.617 | 0.622 | 0.628 | 0.633 | 0.639 |
| Brighton and Hove            | 0.616 | 0.618 | 0.619 | 0.62  | 0.621 | 0.622 | 0.622 | 0.621 | 0.621 | 0.621 | 0.62  | 0.62  | 0.621 | 0.622 | 0.625 | 0.629 | 0.633 | 0.638 | 0.643 | 0.648 |
| Buckinghamshire              | 0.628 | 0.63  | 0.631 | 0.631 | 0.632 | 0.631 | 0.63  | 0.628 | 0.626 | 0.625 | 0.623 | 0.621 | 0.62  | 0.621 | 0.623 | 0.627 | 0.632 | 0.637 | 0.643 | 0.649 |
| East Sussex                  | 0.568 | 0.571 | 0.572 | 0.573 | 0.574 | 0.574 | 0.573 | 0.572 | 0.571 | 0.569 | 0.568 | 0.566 | 0.566 | 0.567 | 0.57  | 0.574 | 0.579 | 0.585 | 0.591 | 0.597 |
| Hampshire                    | 0.605 | 0.607 | 0.608 | 0.609 | 0.609 | 0.609 | 0.607 | 0.606 | 0.604 | 0.602 | 0.6   | 0.599 | 0.598 | 0.598 | 0.601 | 0.605 | 0.61  | 0.616 | 0.621 | 0.627 |
| Isle of Wight                | 0.565 | 0.568 | 0.569 | 0.57  | 0.571 | 0.57  | 0.569 | 0.567 | 0.566 | 0.564 | 0.562 | 0.56  | 0.559 | 0.56  | 0.562 | 0.566 | 0.572 | 0.578 | 0.584 | 0.59  |
| Kent                         | 0.582 | 0.585 | 0.586 | 0.587 | 0.587 | 0.587 | 0.585 | 0.584 | 0.582 | 0.581 | 0.579 | 0.577 | 0.577 | 0.577 | 0.58  | 0.584 | 0.589 | 0.595 | 0.601 | 0.607 |
| Medway                       | 0.56  | 0.563 | 0.564 | 0.565 | 0.565 | 0.564 | 0.563 | 0.561 | 0.559 | 0.557 | 0.555 | 0.554 | 0.553 | 0.553 | 0.556 | 0.56  | 0.565 | 0.571 | 0.577 | 0.583 |
| Milton Keynes                | 0.602 | 0.605 | 0.606 | 0.607 | 0.608 | 0.607 | 0.605 | 0.603 | 0.601 | 0.599 | 0.596 | 0.594 | 0.592 | 0.593 | 0.595 | 0.599 | 0.605 | 0.611 | 0.618 | 0.625 |
| Oxfordshire                  | 0.63  | 0.632 | 0.633 | 0.634 | 0.634 | 0.634 | 0.633 | 0.631 | 0.63  | 0.629 | 0.627 | 0.626 | 0.626 | 0.627 | 0.629 | 0.633 | 0.638 | 0.643 | 0.649 | 0.654 |
| Portsmouth                   | 0.593 | 0.596 | 0.597 | 0.598 | 0.599 | 0.599 | 0.598 | 0.597 | 0.596 | 0.595 | 0.594 | 0.593 | 0.592 | 0.593 | 0.596 | 0.601 | 0.606 | 0.612 | 0.619 | 0.625 |
| Reading                      | 0.635 | 0.637 | 0.638 | 0.639 | 0.639 | 0.639 | 0.638 | 0.636 | 0.635 | 0.633 | 0.632 | 0.631 | 0.63  | 0.631 | 0.634 | 0.637 | 0.643 | 0.648 | 0.654 | 0.66  |
| Slough                       | 0.625 | 0.627 | 0.628 | 0.628 | 0.628 | 0.627 | 0.624 | 0.621 | 0.619 | 0.616 | 0.612 | 0.609 | 0.607 | 0.607 | 0.609 | 0.613 | 0.618 | 0.624 | 0.631 | 0.637 |
| Southampton                  | 0.609 | 0.611 | 0.612 | 0.613 | 0.613 | 0.613 | 0.612 | 0.61  | 0.609 | 0.608 | 0.606 | 0.605 | 0.605 | 0.605 | 0.608 | 0.612 | 0.617 | 0.623 | 0.628 | 0.634 |
| Surrey                       | 0.636 | 0.638 | 0.639 | 0.64  | 0.641 | 0.64  | 0.639 | 0.638 | 0.637 | 0.635 | 0.634 | 0.633 | 0.633 | 0.634 | 0.636 | 0.64  | 0.645 | 0.65  | 0.655 | 0.661 |
| West Berkshire               | 0.631 | 0.633 | 0.634 | 0.635 | 0.635 | 0.634 | 0.633 | 0.631 | 0.629 | 0.627 | 0.624 | 0.623 | 0.621 | 0.622 | 0.624 | 0.628 | 0.634 | 0.64  | 0.646 | 0.652 |
| West Sussex                  | 0.596 | 0.598 | 0.599 | 0.601 | 0.601 | 0.601 | 0.6   | 0.599 | 0.597 | 0.596 | 0.594 | 0.593 | 0.593 | 0.593 | 0.596 | 0.6   | 0.605 | 0.611 | 0.617 | 0.623 |
| Windsor and Maidenhead       | 0.642 | 0.644 | 0.645 | 0.646 | 0.646 | 0.646 | 0.644 | 0.643 | 0.641 | 0.639 | 0.637 | 0.636 | 0.635 | 0.636 | 0.638 | 0.642 | 0.647 | 0.652 | 0.658 | 0.664 |
| Wokingham                    | 0.642 | 0.643 | 0.644 | 0.645 | 0.645 | 0.644 | 0.643 | 0.642 | 0.64  | 0.639 | 0.637 | 0.636 | 0.635 | 0.636 | 0.638 | 0.642 | 0.647 | 0.652 | 0.658 | 0.664 |
| South West England           | 0.577 | 0.58  | 0.581 | 0.582 | 0.583 | 0.583 | 0.582 | 0.581 | 0.58  | 0.579 | 0.578 | 0.577 | 0.577 | 0.578 | 0.58  | 0.585 | 0.59  | 0.596 | 0.602 | 0.608 |
| Bath and North East Somerset | 0.597 | 0.599 | 0.601 | 0.602 | 0.603 | 0.604 | 0.604 | 0.604 | 0.604 | 0.603 | 0.604 | 0.604 | 0.605 | 0.606 | 0.609 | 0.613 | 0.618 | 0.624 | 0.629 | 0.634 |
| Bournemouth                  | 0.573 | 0.576 | 0.577 | 0.579 | 0.58  | 0.581 | 0.581 | 0.581 | 0.581 | 0.581 | 0.581 | 0.582 | 0.583 | 0.585 | 0.588 | 0.592 | 0.597 | 0.603 | 0.608 | 0.614 |
| Bristol, City of             | 0.607 | 0.609 | 0.61  | 0.611 | 0.612 | 0.612 | 0.611 | 0.61  | 0.61  | 0.609 | 0.608 | 0.607 | 0.607 | 0.608 | 0.611 | 0.615 | 0.62  | 0.626 | 0.632 | 0.637 |
| Cornwall                     | 0.548 | 0.551 | 0.552 | 0.553 | 0.554 | 0.554 | 0.553 | 0.552 | 0.551 | 0.549 | 0.548 | 0.547 | 0.546 | 0.547 | 0.55  | 0.554 | 0.56  | 0.566 | 0.572 | 0.578 |
| Devon                        | 0.566 | 0.568 | 0.57  | 0.571 | 0.572 | 0.572 | 0.572 | 0.571 | 0.57  | 0.57  | 0.569 | 0.568 | 0.568 | 0.57  | 0.573 | 0.577 | 0.582 | 0.588 | 0.594 | 0.6   |
| Dorset                       | 0.568 | 0.57  | 0.571 | 0.573 | 0.573 | 0.573 | 0.573 | 0.572 | 0.571 | 0.569 | 0.568 | 0.567 | 0.567 | 0.568 | 0.571 | 0.575 | 0.58  | 0.586 | 0.593 | 0.599 |
| Gloucestershire              | 0.584 | 0.587 | 0.588 | 0.589 | 0.59  | 0.59  | 0.589 | 0.587 | 0.586 | 0.585 | 0.584 | 0.583 | 0.582 | 0.583 | 0.586 | 0.59  | 0.595 | 0.601 | 0.607 | 0.613 |
| North Somerset               | 0.561 | 0.563 | 0.564 | 0.566 | 0.566 | 0.566 | 0.566 | 0.565 | 0.564 | 0.562 | 0.561 | 0.56  | 0.56  | 0.561 | 0.564 | 0.568 | 0.573 | 0.579 | 0.585 | 0.591 |
| Plymouth                     | 0.56  | 0.563 | 0.564 | 0.566 | 0.567 | 0.567 | 0.566 | 0.566 | 0.565 | 0.564 | 0.563 | 0.562 | 0.562 | 0.563 | 0.566 | 0.571 | 0.576 | 0.582 | 0.588 | 0.594 |
| Poole                        | 0.575 | 0.578 | 0.579 | 0.58  | 0.581 | 0.581 | 0.58  | 0.579 | 0.578 | 0.576 | 0.575 | 0.574 | 0.574 | 0.575 | 0.578 | 0.582 | 0.587 | 0.593 | 0.6   | 0.606 |
| Somerset                     | 0.564 | 0.567 | 0.568 | 0.569 | 0.57  | 0.57  | 0.569 | 0.568 | 0.566 | 0.565 | 0.563 | 0.562 | 0.562 | 0.563 | 0.565 | 0.57  | 0.575 | 0.581 | 0.587 | 0.593 |
| South Gloucestershire        | 0.599 | 0.601 | 0.602 | 0.603 | 0.604 | 0.604 | 0.603 | 0.601 | 0.6   | 0.599 | 0.597 | 0.596 | 0.596 | 0.597 | 0.6   | 0.604 | 0.609 | 0.615 | 0.621 | 0.627 |
| Swindon                      | 0.598 | 0.6   | 0.601 | 0.602 | 0.603 | 0.602 | 0.601 | 0.599 | 0.597 | 0.595 | 0.593 | 0.591 | 0.59  | 0.591 | 0.593 | 0.597 | 0.602 | 0.609 | 0.615 | 0.621 |
| Torbay                       | 0.542 | 0.545 | 0.546 | 0.548 | 0.549 | 0.549 | 0.549 | 0.548 | 0.548 | 0.547 | 0.546 | 0.545 | 0.545 | 0.546 | 0.549 | 0.554 | 0.559 | 0.565 | 0.571 | 0.578 |
| Wiltshire                    | 0.58  | 0.582 | 0.584 | 0.585 | 0.585 | 0.585 | 0.583 | 0.582 | 0.58  | 0.579 | 0.577 | 0.575 | 0.574 | 0.575 | 0.578 | 0.582 | 0.587 | 0.593 | 0.599 | 0.605 |
| West Midlands                | 0.555 | 0.557 | 0.558 | 0.559 | 0.56  | 0.559 | 0.558 | 0.557 | 0.555 | 0.554 | 0.552 | 0.551 | 0.55  | 0.551 | 0.553 | 0.557 | 0.563 | 0.569 | 0.575 | 0.581 |
| Birmingham                   | 0.552 | 0.554 | 0.555 | 0.555 | 0.556 | 0.555 | 0.554 | 0.552 | 0.551 | 0.549 | 0.547 | 0.545 | 0.544 | 0.545 | 0.547 | 0.551 | 0.557 | 0.563 | 0.569 | 0.575 |
| Coventry                     | 0.57  | 0.572 | 0.572 | 0.573 | 0.574 | 0.573 | 0.572 | 0.57  | 0.569 | 0.567 | 0.565 | 0.564 | 0.563 | 0.564 | 0.567 | 0.571 | 0.576 | 0.582 | 0.588 | 0.594 |
| Dudley                       | 0.543 | 0.545 | 0.546 | 0.547 | 0.548 | 0.547 | 0.546 | 0.545 | 0.543 | 0.542 | 0.54  | 0.539 | 0.538 | 0.539 | 0.541 | 0.546 | 0.551 | 0.557 | 0.563 | 0.569 |
| Herefordshire, County of     | 0.557 | 0.559 | 0.56  | 0.561 | 0.562 | 0.562 | 0.56  | 0.559 | 0.558 | 0.556 | 0.555 | 0.553 | 0.553 | 0.554 | 0.556 | 0.56  | 0.566 | 0.572 | 0.578 | 0.584 |
| Sandwell                     | 0.535 | 0.537 | 0.538 | 0.539 | 0.539 | 0.539 | 0.537 | 0.535 | 0.534 | 0.531 | 0.529 | 0.527 | 0.526 | 0.527 | 0.529 | 0.533 | 0.538 | 0.544 | 0.55  | 0.556 |
| Shropshire                   | 0.558 | 0.56  | 0.561 | 0.562 | 0.563 | 0.563 | 0.562 | 0.561 | 0.56  | 0.558 | 0.557 | 0.556 | 0.555 | 0.556 | 0.559 | 0.563 | 0.569 | 0.575 | 0.581 | 0.587 |
| Solihull                     | 0.59  | 0.592 | 0.593 | 0.594 | 0.595 | 0.594 | 0.593 | 0.591 | 0.59  | 0.588 | 0.586 | 0.585 | 0.584 | 0.585 | 0.587 | 0.591 | 0.596 | 0.602 | 0.608 | 0.614 |
| Staffordshire                | 0.557 | 0.559 | 0.56  | 0.561 | 0.562 | 0.562 | 0.561 | 0.559 | 0.558 | 0.557 | 0.555 | 0.554 | 0.554 | 0.555 | 0.557 | 0.562 | 0.567 | 0.573 | 0.579 | 0.585 |
| Stoke-on-Trent               | 0.538 | 0.54  | 0.54  | 0.541 | 0.542 | 0.541 | 0.54  | 0.539 | 0.537 | 0.536 | 0.534 | 0.532 | 0.532 | 0.532 | 0.535 | 0.539 | 0.544 | 0.55  | 0.556 | 0.562 |
| Telford and Wrekin           | 0.561 | 0.564 | 0.564 | 0.565 | 0.566 | 0.565 | 0.564 | 0.562 | 0.56  | 0.558 | 0.556 | 0.554 | 0.553 | 0.554 | 0.556 | 0.56  | 0.566 | 0.572 | 0.579 | 0.585 |
| Walsall                      | 0.534 | 0.536 | 0.537 | 0.538 | 0.539 | 0.538 | 0.537 | 0.535 | 0.533 | 0.532 | 0.53  | 0.528 | 0.527 | 0.528 | 0.53  | 0.534 | 0.54  | 0.546 | 0.552 | 0.558 |
| Warwickshire                 | 0.582 | 0.584 | 0.585 | 0.586 | 0.586 | 0.586 | 0.585 | 0.584 | 0.582 | 0.581 | 0.579 | 0.578 | 0.577 | 0.578 | 0.581 | 0.585 | 0.59  | 0.596 | 0.602 | 0.608 |
| Wolverhampton                | 0.544 | 0.546 | 0.547 | 0.547 | 0.548 | 0.547 | 0.546 | 0.544 | 0.542 | 0.541 | 0.539 | 0.537 | 0.536 | 0.536 | 0.539 | 0.543 | 0.548 | 0.554 | 0.56  | 0.566 |
| Worcestershire               | 0.556 | 0.558 | 0.559 |       |       |       |       |       |       |       |       |       |       |       |       |       |       |       |       |       |

**Appendix Table 8. Socio-Demographic Index values for all estimated GBD 2017 locations, 1950-1969**

| Location                         | 1950  | 1951  | 1952  | 1953  | 1954  | 1955  | 1956  | 1957  | 1958  | 1959  | 1960  | 1961  | 1962  | 1963  | 1964  | 1965  | 1966  | 1967  | 1968  | 1969  |
|----------------------------------|-------|-------|-------|-------|-------|-------|-------|-------|-------|-------|-------|-------|-------|-------|-------|-------|-------|-------|-------|-------|
| Kirklees                         | 0.543 | 0.545 | 0.546 | 0.548 | 0.548 | 0.548 | 0.547 | 0.546 | 0.545 | 0.543 | 0.542 | 0.54  | 0.54  | 0.541 | 0.544 | 0.548 | 0.553 | 0.56  | 0.566 | 0.572 |
| Leeds                            | 0.579 | 0.581 | 0.582 | 0.583 | 0.584 | 0.584 | 0.583 | 0.583 | 0.582 | 0.581 | 0.58  | 0.579 | 0.579 | 0.58  | 0.583 | 0.587 | 0.592 | 0.598 | 0.604 | 0.61  |
| North East Lincolnshire          | 0.547 | 0.549 | 0.55  | 0.551 | 0.552 | 0.551 | 0.549 | 0.547 | 0.545 | 0.543 | 0.541 | 0.538 | 0.537 | 0.538 | 0.54  | 0.545 | 0.55  | 0.557 | 0.564 | 0.57  |
| North Lincolnshire               | 0.554 | 0.556 | 0.557 | 0.558 | 0.558 | 0.558 | 0.556 | 0.555 | 0.553 | 0.551 | 0.549 | 0.547 | 0.546 | 0.547 | 0.549 | 0.553 | 0.559 | 0.565 | 0.572 | 0.578 |
| North Yorkshire                  | 0.569 | 0.571 | 0.573 | 0.574 | 0.575 | 0.575 | 0.574 | 0.573 | 0.572 | 0.571 | 0.569 | 0.568 | 0.568 | 0.569 | 0.572 | 0.576 | 0.582 | 0.588 | 0.594 | 0.6   |
| Rotherham                        | 0.531 | 0.533 | 0.534 | 0.535 | 0.536 | 0.536 | 0.534 | 0.533 | 0.532 | 0.53  | 0.528 | 0.527 | 0.526 | 0.527 | 0.53  | 0.534 | 0.539 | 0.546 | 0.552 | 0.558 |
| Sheffield                        | 0.569 | 0.571 | 0.572 | 0.573 | 0.574 | 0.574 | 0.574 | 0.573 | 0.573 | 0.572 | 0.571 | 0.571 | 0.571 | 0.572 | 0.575 | 0.58  | 0.585 | 0.591 | 0.596 | 0.602 |
| Wakefield                        | 0.539 | 0.542 | 0.543 | 0.544 | 0.545 | 0.544 | 0.543 | 0.542 | 0.54  | 0.539 | 0.537 | 0.536 | 0.535 | 0.536 | 0.539 | 0.543 | 0.548 | 0.555 | 0.561 | 0.567 |
| York                             | 0.601 | 0.603 | 0.605 | 0.606 | 0.607 | 0.607 | 0.606 | 0.606 | 0.605 | 0.605 | 0.604 | 0.604 | 0.604 | 0.606 | 0.609 | 0.613 | 0.618 | 0.623 | 0.629 | 0.635 |
| Northern Ireland                 | 0.502 | 0.505 | 0.506 | 0.508 | 0.508 | 0.509 | 0.509 | 0.511 | 0.512 | 0.513 | 0.514 | 0.515 | 0.517 | 0.52  | 0.525 | 0.533 | 0.541 | 0.549 | 0.557 | 0.565 |
| Scotland                         | 0.508 | 0.51  | 0.51  | 0.51  | 0.511 | 0.511 | 0.509 | 0.508 | 0.508 | 0.509 | 0.509 | 0.509 | 0.509 | 0.511 | 0.514 | 0.519 | 0.523 | 0.527 | 0.533 | 0.538 |
| Wales                            | 0.465 | 0.467 | 0.468 | 0.469 | 0.47  | 0.47  | 0.469 | 0.468 | 0.467 | 0.466 | 0.464 | 0.463 | 0.463 | 0.464 | 0.467 | 0.471 | 0.477 | 0.483 | 0.489 | 0.496 |
| Latin America and Caribbean      | 0.28  | 0.284 | 0.287 | 0.29  | 0.293 | 0.296 | 0.3   | 0.303 | 0.306 | 0.308 | 0.312 | 0.316 | 0.321 | 0.326 | 0.331 | 0.338 | 0.345 | 0.352 | 0.359 | 0.366 |
| Andean Latin America             | 0.256 | 0.264 | 0.272 | 0.278 | 0.28  | 0.282 | 0.285 | 0.288 | 0.289 | 0.291 | 0.293 | 0.296 | 0.301 | 0.306 | 0.312 | 0.32  | 0.329 | 0.337 | 0.344 | 0.349 |
| Bolivia                          | 0.235 | 0.245 | 0.251 | 0.255 | 0.258 | 0.264 | 0.268 | 0.265 | 0.258 | 0.253 | 0.252 | 0.253 | 0.256 | 0.26  | 0.265 | 0.272 | 0.279 | 0.285 | 0.29  | 0.295 |
| Ecuador                          | 0.288 | 0.3   | 0.313 | 0.323 | 0.325 | 0.321 | 0.319 | 0.322 | 0.326 | 0.329 | 0.327 | 0.325 | 0.328 | 0.333 | 0.339 | 0.35  | 0.362 | 0.37  | 0.38  | 0.385 |
| Peru                             | 0.244 | 0.248 | 0.252 | 0.255 | 0.259 | 0.263 | 0.268 | 0.272 | 0.277 | 0.281 | 0.286 | 0.293 | 0.299 | 0.305 | 0.31  | 0.316 | 0.324 | 0.332 | 0.338 | 0.341 |
| Caribbean                        | 0.344 | 0.348 | 0.35  | 0.35  | 0.35  | 0.351 | 0.353 | 0.355 | 0.355 | 0.354 | 0.354 | 0.355 | 0.357 | 0.359 | 0.364 | 0.374 | 0.387 | 0.398 | 0.403 | 0.407 |
| Antigua and Barbuda              | 0.331 | 0.334 | 0.335 | 0.336 | 0.336 | 0.337 | 0.341 | 0.346 | 0.352 | 0.359 | 0.367 | 0.375 | 0.384 | 0.392 | 0.402 | 0.411 | 0.421 | 0.433 | 0.444 | 0.456 |
| The Bahamas                      | 0.446 | 0.45  | 0.454 | 0.46  | 0.468 | 0.475 | 0.481 | 0.489 | 0.498 | 0.504 | 0.504 | 0.502 | 0.501 | 0.505 | 0.512 | 0.519 | 0.526 | 0.534 | 0.543 | 0.553 |
| Barbados                         | 0.433 | 0.428 | 0.422 | 0.416 | 0.415 | 0.42  | 0.427 | 0.431 | 0.432 | 0.434 | 0.442 | 0.455 | 0.464 | 0.47  | 0.473 | 0.479 | 0.489 | 0.499 | 0.507 | 0.515 |
| Belize                           | 0.274 | 0.276 | 0.276 | 0.275 | 0.274 | 0.272 | 0.27  | 0.267 | 0.264 | 0.261 | 0.258 | 0.255 | 0.253 | 0.252 | 0.252 | 0.254 | 0.259 | 0.264 | 0.269 | 0.273 |
| Bermuda                          | 0.451 | 0.458 | 0.463 | 0.468 | 0.473 | 0.478 | 0.484 | 0.489 | 0.496 | 0.502 | 0.508 | 0.514 | 0.522 | 0.533 | 0.545 | 0.556 | 0.568 | 0.58  | 0.591 | 0.6   |
| Cuba                             | 0.412 | 0.417 | 0.418 | 0.415 | 0.413 | 0.414 | 0.414 | 0.414 | 0.41  | 0.402 | 0.392 | 0.382 | 0.376 | 0.375 | 0.38  | 0.393 | 0.412 | 0.428 | 0.429 | 0.428 |
| Dominica                         | 0.322 | 0.322 | 0.319 | 0.314 | 0.307 | 0.303 | 0.299 | 0.295 | 0.294 | 0.294 | 0.298 | 0.304 | 0.31  | 0.312 | 0.312 | 0.314 | 0.318 | 0.322 | 0.329 | 0.339 |
| Dominican Republic               | 0.208 | 0.213 | 0.215 | 0.215 | 0.214 | 0.217 | 0.221 | 0.225 | 0.227 | 0.228 | 0.234 | 0.244 | 0.25  | 0.251 | 0.253 | 0.258 | 0.267 | 0.275 | 0.281 | 0.285 |
| Grenada                          | 0.227 | 0.225 | 0.222 | 0.217 | 0.211 | 0.207 | 0.206 | 0.21  | 0.22  | 0.232 | 0.246 | 0.26  | 0.273 | 0.284 | 0.295 | 0.303 | 0.311 | 0.317 | 0.323 | 0.329 |
| Guyana                           | 0.28  | 0.282 | 0.284 | 0.285 | 0.285 | 0.285 | 0.285 | 0.285 | 0.286 | 0.287 | 0.291 | 0.297 | 0.305 | 0.313 | 0.323 | 0.335 | 0.348 | 0.362 | 0.374 | 0.384 |
| Haiti                            | 0.206 | 0.208 | 0.211 | 0.214 | 0.217 | 0.22  | 0.223 | 0.226 | 0.23  | 0.233 | 0.237 | 0.24  | 0.244 | 0.248 | 0.251 | 0.254 | 0.258 | 0.261 | 0.264 | 0.267 |
| Jamaica                          | 0.402 | 0.404 | 0.404 | 0.404 | 0.402 | 0.399 | 0.396 | 0.394 | 0.39  | 0.386 | 0.382 | 0.377 | 0.374 | 0.372 | 0.37  | 0.372 | 0.377 | 0.385 | 0.393 | 0.399 |
| Puerto Rico                      | 0.401 | 0.409 | 0.419 | 0.425 | 0.423 | 0.421 | 0.426 | 0.433 | 0.44  | 0.448 | 0.457 | 0.465 | 0.471 | 0.476 | 0.485 | 0.501 | 0.522 | 0.54  | 0.552 | 0.559 |
| Saint Lucia                      | 0.317 | 0.321 | 0.322 | 0.32  | 0.316 | 0.312 | 0.307 | 0.303 | 0.3   | 0.3   | 0.302 | 0.304 | 0.306 | 0.308 | 0.309 | 0.311 | 0.314 | 0.316 | 0.319 | 0.324 |
| Saint Vincent and the Grenadines | 0.26  | 0.258 | 0.252 | 0.238 | 0.22  | 0.199 | 0.18  | 0.171 | 0.169 | 0.173 | 0.185 | 0.202 | 0.213 | 0.216 | 0.218 | 0.226 | 0.24  | 0.255 | 0.266 | 0.271 |
| Suriname                         | 0.314 | 0.311 | 0.309 | 0.308 | 0.308 | 0.309 | 0.309 | 0.307 | 0.306 | 0.306 | 0.309 | 0.318 | 0.335 | 0.349 | 0.356 | 0.361 | 0.366 | 0.371 | 0.377 | 0.385 |
| Trinidad and Tobago              | 0.363 | 0.366 | 0.366 | 0.365 | 0.365 | 0.366 | 0.367 | 0.368 | 0.371 | 0.374 | 0.38  | 0.388 | 0.397 | 0.409 | 0.423 | 0.436 | 0.45  | 0.463 | 0.476 | 0.487 |
| Virgin Islands                   | 0.453 | 0.456 | 0.457 | 0.453 | 0.446 | 0.439 | 0.431 | 0.424 | 0.419 | 0.419 | 0.424 | 0.429 | 0.433 | 0.437 | 0.442 | 0.45  | 0.46  | 0.471 | 0.485 | 0.499 |
| Central Latin America            | 0.275 | 0.277 | 0.28  | 0.282 | 0.285 | 0.288 | 0.292 | 0.294 | 0.296 | 0.298 | 0.301 | 0.306 | 0.311 | 0.316 | 0.322 | 0.329 | 0.336 | 0.344 | 0.353 | 0.36  |
| Colombia                         | 0.28  | 0.281 | 0.283 | 0.285 | 0.287 | 0.287 | 0.287 | 0.287 | 0.287 | 0.287 | 0.288 | 0.291 | 0.296 | 0.301 | 0.308 | 0.315 | 0.324 | 0.333 | 0.342 | 0.351 |
| Costa Rica                       | 0.308 | 0.313 | 0.317 | 0.316 | 0.312 | 0.313 | 0.315 | 0.314 | 0.307 | 0.303 | 0.306 | 0.314 | 0.325 | 0.339 | 0.352 | 0.364 | 0.376 | 0.39  | 0.405 | 0.417 |
| El Salvador                      | 0.22  | 0.222 | 0.224 | 0.226 | 0.228 | 0.23  | 0.233 | 0.236 | 0.239 | 0.242 | 0.245 | 0.249 | 0.253 | 0.257 | 0.262 | 0.267 | 0.272 | 0.278 | 0.284 | 0.29  |
| Guatemala                        | 0.203 | 0.208 | 0.211 | 0.213 | 0.219 | 0.226 | 0.228 | 0.229 | 0.23  | 0.229 | 0.23  | 0.235 | 0.239 | 0.238 | 0.244 | 0.253 | 0.259 | 0.264 | 0.269 | 0.273 |
| Honduras                         | 0.17  | 0.173 | 0.176 | 0.18  | 0.182 | 0.185 | 0.189 | 0.193 | 0.198 | 0.202 | 0.204 | 0.206 | 0.207 | 0.208 | 0.211 | 0.215 | 0.219 | 0.224 | 0.23  | 0.236 |
| Mexico                           | 0.271 | 0.274 | 0.278 | 0.281 | 0.284 | 0.289 | 0.293 | 0.297 | 0.301 | 0.306 | 0.31  | 0.315 | 0.32  | 0.325 | 0.331 | 0.337 | 0.344 | 0.351 | 0.358 | 0.365 |
| Aguascalientes                   | 0.29  | 0.294 | 0.297 | 0.3   | 0.303 | 0.308 | 0.312 | 0.317 | 0.321 | 0.326 | 0.332 | 0.339 | 0.345 | 0.351 | 0.356 | 0.363 | 0.371 | 0.379 | 0.387 | 0.394 |
| Baja California                  | 0.297 | 0.302 | 0.306 | 0.309 | 0.313 | 0.318 | 0.322 | 0.327 | 0.331 | 0.336 | 0.341 | 0.347 | 0.352 | 0.359 | 0.366 | 0.373 | 0.381 | 0.39  | 0.399 | 0.408 |
| Baja California Sur              | 0.303 | 0.307 | 0.31  | 0.313 | 0.317 | 0.321 | 0.325 | 0.329 | 0.332 | 0.336 | 0.34  | 0.345 | 0.35  | 0.356 | 0.361 | 0.368 | 0.375 | 0.383 | 0.392 | 0.4   |
| Campeche                         | 0.267 | 0.271 | 0.275 | 0.278 | 0.282 | 0.286 | 0.29  | 0.294 | 0.297 | 0.301 | 0.304 | 0.308 | 0.311 | 0.315 | 0.32  | 0.324 | 0.33  | 0.335 | 0.341 | 0.346 |
| Chiapas                          | 0.22  | 0.223 | 0.226 | 0.229 | 0.232 | 0.236 | 0.239 | 0.243 | 0.246 | 0.25  | 0.253 | 0.257 | 0.261 | 0.265 | 0.27  | 0.275 | 0.28  | 0.286 | 0.291 | 0.297 |
| Chihuahua                        | 0.271 | 0.275 | 0.279 | 0.282 | 0.286 | 0.29  | 0.294 | 0.299 | 0.303 | 0.307 | 0.312 | 0.318 | 0.323 | 0.329 | 0.335 | 0.342 | 0.349 | 0.357 | 0.365 | 0.373 |
| Coahuila                         | 0.295 | 0.299 | 0.303 | 0.307 | 0.311 | 0.315 | 0.319 | 0.324 | 0.328 | 0.333 | 0.338 | 0.343 | 0.348 | 0.354 | 0.36  | 0.367 | 0.373 | 0.38  | 0.387 | 0.394 |
| Colima                           | 0.272 | 0.275 | 0.279 | 0.282 | 0.286 | 0.291 | 0.295 | 0.299 | 0.304 | 0.308 | 0.314 | 0.319 | 0.325 | 0.33  | 0.337 | 0.344 | 0.351 | 0.358 | 0.366 | 0.373 |
| Mexico City                      | 0.313 | 0.318 | 0.322 | 0.325 | 0.33  | 0.335 | 0.34  | 0.345 | 0.351 | 0.357 | 0.362 | 0.368 | 0.374 | 0.381 | 0.389 | 0.397 | 0.404 | 0.415 | 0.426 | 0.436 |
| Durango                          | 0.253 | 0.256 | 0.259 | 0.262 | 0.265 | 0.269 | 0.273 | 0.277 | 0.281 | 0.285 | 0.29  | 0.296 | 0.301 | 0.306 | 0.312 | 0.319 | 0.326 | 0.333 | 0.339 | 0.346 |
| Guanajuato                       | 0.244 | 0.247 | 0.25  | 0.252 | 0.256 | 0.26  | 0.264 | 0.268 | 0.272 | 0.276 | 0.281 | 0.286 | 0.291 | 0.297 | 0.302 | 0.308 | 0.315 | 0.321 | 0.328 | 0.334 |
| Guerrero                         | 0.203 | 0.207 | 0.21  | 0.213 | 0.216 | 0.22  | 0.224 | 0.228 | 0.232 | 0.236 | 0.24  | 0.244 | 0.249 | 0.253 | 0.259 | 0.264 | 0.27  | 0.276 | 0.282 | 0.287 |
| Hidalgo                          | 0.192 | 0.195 | 0.198 | 0.2   | 0.204 | 0.207 | 0.21  | 0.214 | 0.218 | 0.223 | 0.227 | 0.23  | 0.235 | 0.24  | 0.246 | 0.252 | 0.257 | 0.263 | 0.269 | 0.275 |
| Jalisco                          | 0.278 | 0.282 | 0.286 | 0.289 | 0.293 | 0.298 | 0.303 | 0.307 | 0.312 | 0.317 | 0.323 | 0.329 | 0.335 | 0.341 | 0.347 | 0.354 | 0.361 | 0.368 | 0.375 | 0.382 |
| México                           | 0.272 | 0.276 | 0.279 | 0.282 | 0.286 | 0.2   |       |       |       |       |       |       |       |       |       |       |       |       |       |       |

**Appendix Table 8. Socio-Demographic Index values for all estimated GBD 2017 locations, 1950-1969**

| Location                        | 1950  | 1951  | 1952  | 1953  | 1954    | 1955  | 1956  | 1957  | 1958  | 1959  | 1960  | 1961  | 1962  | 1963  | 1964  | 1965  | 1966  | 1967  | 1968  | 1969  |
|---------------------------------|-------|-------|-------|-------|---------|-------|-------|-------|-------|-------|-------|-------|-------|-------|-------|-------|-------|-------|-------|-------|
| Quintana Roo                    | 0.301 | 0.305 | 0.309 | 0.313 | 0.318   | 0.322 | 0.326 | 0.33  | 0.334 | 0.339 | 0.344 | 0.349 | 0.354 | 0.359 | 0.365 | 0.371 | 0.378 | 0.385 | 0.391 | 0.395 |
| San Luis Potosí                 | 0.235 | 0.239 | 0.242 | 0.245 | 0.249   | 0.253 | 0.257 | 0.261 | 0.266 | 0.27  | 0.275 | 0.28  | 0.285 | 0.29  | 0.296 | 0.302 | 0.309 | 0.316 | 0.323 | 0.329 |
| Sinaloa                         | 0.265 | 0.268 | 0.271 | 0.274 | 0.277   | 0.281 | 0.285 | 0.288 | 0.292 | 0.296 | 0.301 | 0.306 | 0.311 | 0.316 | 0.322 | 0.328 | 0.335 | 0.342 | 0.348 | 0.355 |
| Sonora                          | 0.279 | 0.283 | 0.286 | 0.289 | 0.293   | 0.298 | 0.302 | 0.306 | 0.31  | 0.315 | 0.32  | 0.326 | 0.331 | 0.338 | 0.345 | 0.352 | 0.36  | 0.368 | 0.377 | 0.386 |
| Tabasco                         | 0.234 | 0.237 | 0.241 | 0.244 | 0.247   | 0.251 | 0.255 | 0.259 | 0.262 | 0.266 | 0.27  | 0.274 | 0.278 | 0.282 | 0.287 | 0.292 | 0.299 | 0.305 | 0.311 | 0.316 |
| Tamaulipas                      | 0.286 | 0.29  | 0.293 | 0.297 | 0.301   | 0.306 | 0.31  | 0.315 | 0.319 | 0.324 | 0.329 | 0.335 | 0.34  | 0.346 | 0.353 | 0.36  | 0.368 | 0.376 | 0.384 | 0.393 |
| Tlaxcala                        | 0.225 | 0.228 | 0.232 | 0.235 | 0.239   | 0.243 | 0.247 | 0.252 | 0.257 | 0.262 | 0.267 | 0.272 | 0.278 | 0.283 | 0.289 | 0.295 | 0.302 | 0.308 | 0.315 | 0.321 |
| Veracruz de Ignacio de la Llave | 0.236 | 0.24  | 0.244 | 0.247 | 0.25    | 0.255 | 0.258 | 0.263 | 0.267 | 0.271 | 0.275 | 0.279 | 0.283 | 0.288 | 0.294 | 0.299 | 0.305 | 0.311 | 0.317 | 0.323 |
| Yucatán                         | 0.274 | 0.278 | 0.281 | 0.284 | 0.288   | 0.293 | 0.297 | 0.301 | 0.306 | 0.311 | 0.315 | 0.318 | 0.322 | 0.327 | 0.332 | 0.337 | 0.341 | 0.346 | 0.352 | 0.357 |
| Zacatecas                       | 0.221 | 0.225 | 0.227 | 0.23  | 0.233   | 0.237 | 0.24  | 0.244 | 0.248 | 0.252 | 0.258 | 0.263 | 0.269 | 0.274 | 0.28  | 0.287 | 0.294 | 0.301 | 0.307 | 0.313 |
| Nicaragua                       | 0.217 | 0.219 | 0.221 | 0.221 | 0.22    | 0.219 | 0.218 | 0.216 | 0.215 | 0.214 | 0.215 | 0.217 | 0.221 | 0.224 | 0.227 | 0.232 | 0.237 | 0.243 | 0.249 | 0.257 |
| Panama                          | 0.323 | 0.322 | 0.322 | 0.324 | 0.327   | 0.33  | 0.332 | 0.337 | 0.342 | 0.346 | 0.347 | 0.348 | 0.349 | 0.351 | 0.354 | 0.36  | 0.367 | 0.374 | 0.382 | 0.391 |
| Venezuela                       | 0.342 | 0.34  | 0.337 | 0.333 | 0.336   | 0.344 | 0.351 | 0.353 | 0.345 | 0.334 | 0.334 | 0.345 | 0.356 | 0.362 | 0.37  | 0.379 | 0.384 | 0.396 | 0.412 | 0.422 |
| Tropical Latin America          | 0.261 | 0.265 | 0.269 | 0.273 | 0.277   | 0.281 | 0.285 | 0.289 | 0.294 | 0.298 | 0.303 | 0.308 | 0.314 | 0.32  | 0.325 | 0.331 | 0.336 | 0.342 | 0.348 | 0.355 |
| Brazil                          | 0.26  | 0.264 | 0.268 | 0.272 | 0.276   | 0.28  | 0.284 | 0.289 | 0.293 | 0.297 | 0.302 | 0.308 | 0.314 | 0.319 | 0.325 | 0.33  | 0.336 | 0.342 | 0.348 | 0.354 |
| Acre                            | 0.172 | 0.175 | 0.177 | 0.18  | 0.182   | 0.185 | 0.187 | 0.189 | 0.192 | 0.195 | 0.199 | 0.203 | 0.208 | 0.213 | 0.218 | 0.223 | 0.228 | 0.232 | 0.237 | 0.242 |
| Alagoas                         | 0.149 | 0.151 | 0.154 | 0.156 | 0.159   | 0.161 | 0.163 | 0.166 | 0.168 | 0.171 | 0.174 | 0.177 | 0.181 | 0.184 | 0.188 | 0.191 | 0.195 | 0.2   | 0.205 | 0.209 |
| Amapá                           | 0.234 | 0.238 | 0.242 | 0.245 | 0.249   | 0.253 | 0.257 | 0.26  | 0.264 | 0.269 | 0.274 | 0.279 | 0.285 | 0.29  | 0.295 | 0.3   | 0.305 | 0.309 | 0.313 | 0.318 |
| Amazonas                        | 0.189 | 0.192 | 0.195 | 0.198 | 0.201   | 0.203 | 0.206 | 0.208 | 0.211 | 0.214 | 0.218 | 0.223 | 0.229 | 0.234 | 0.24  | 0.245 | 0.251 | 0.256 | 0.262 | 0.268 |
| Bahia                           | 0.184 | 0.187 | 0.19  | 0.193 | 0.196   | 0.2   | 0.203 | 0.206 | 0.209 | 0.213 | 0.217 | 0.222 | 0.226 | 0.231 | 0.235 | 0.24  | 0.244 | 0.248 | 0.252 | 0.256 |
| Ceará                           | 0.194 | 0.197 | 0.2   | 0.202 | 0.206   | 0.209 | 0.212 | 0.216 | 0.219 | 0.223 | 0.228 | 0.233 | 0.238 | 0.243 | 0.248 | 0.253 | 0.258 | 0.263 | 0.268 | 0.273 |
| Distrito Federal                | 0.372 | 0.376 | 0.382 | 0.387 | 0.392   | 0.397 | 0.403 | 0.408 | 0.413 | 0.419 | 0.426 | 0.432 | 0.439 | 0.446 | 0.454 | 0.461 | 0.468 | 0.475 | 0.483 | 0.491 |
| Espírito Santo                  | 0.257 | 0.26  | 0.263 | 0.267 | 0.27    | 0.274 | 0.278 | 0.281 | 0.286 | 0.29  | 0.296 | 0.303 | 0.31  | 0.316 | 0.323 | 0.33  | 0.337 | 0.344 | 0.351 | 0.358 |
| Goiás                           | 0.215 | 0.218 | 0.222 | 0.225 | 0.228   | 0.232 | 0.235 | 0.239 | 0.243 | 0.246 | 0.251 | 0.256 | 0.261 | 0.266 | 0.271 | 0.276 | 0.282 | 0.288 | 0.294 | 0.3   |
| Maranhão                        | 0.127 | 0.129 | 0.132 | 0.134 | 0.136   | 0.138 | 0.14  | 0.142 | 0.144 | 0.147 | 0.15  | 0.154 | 0.158 | 0.162 | 0.167 | 0.17  | 0.173 | 0.176 | 0.179 | 0.183 |
| Mato Grosso                     | 0.232 | 0.235 | 0.238 | 0.242 | 0.245   | 0.248 | 0.252 | 0.255 | 0.258 | 0.262 | 0.266 | 0.27  | 0.275 | 0.28  | 0.285 | 0.29  | 0.296 | 0.302 | 0.31  | 0.318 |
| Mato Grosso do Sul              | 0.229 | 0.232 | 0.235 | 0.237 | 0.24    | 0.243 | 0.246 | 0.249 | 0.253 | 0.256 | 0.262 | 0.268 | 0.274 | 0.28  | 0.286 | 0.292 | 0.299 | 0.306 | 0.314 | 0.321 |
| Minas Gerais                    | 0.26  | 0.264 | 0.268 | 0.272 | 0.276   | 0.28  | 0.284 | 0.288 | 0.293 | 0.297 | 0.302 | 0.307 | 0.313 | 0.318 | 0.323 | 0.329 | 0.334 | 0.339 | 0.345 | 0.351 |
| Pará                            | 0.204 | 0.207 | 0.21  | 0.214 | 0.217   | 0.22  | 0.224 | 0.227 | 0.23  | 0.234 | 0.239 | 0.244 | 0.249 | 0.254 | 0.259 | 0.263 | 0.268 | 0.273 | 0.277 | 0.282 |
| Paraíba                         | 0.172 | 0.175 | 0.178 | 0.181 | 0.184   | 0.187 | 0.19  | 0.192 | 0.195 | 0.198 | 0.202 | 0.206 | 0.21  | 0.214 | 0.218 | 0.221 | 0.225 | 0.229 | 0.234 | 0.238 |
| Paraná                          | 0.267 | 0.27  | 0.274 | 0.278 | 0.282   | 0.286 | 0.29  | 0.294 | 0.298 | 0.302 | 0.306 | 0.311 | 0.315 | 0.32  | 0.324 | 0.328 | 0.333 | 0.339 | 0.345 | 0.351 |
| Pernambuco                      | 0.19  | 0.193 | 0.196 | 0.199 | 0.202   | 0.205 | 0.209 | 0.212 | 0.215 | 0.219 | 0.223 | 0.228 | 0.232 | 0.237 | 0.242 | 0.246 | 0.251 | 0.256 | 0.262 | 0.267 |
| Piauí                           | 0.162 | 0.164 | 0.167 | 0.169 | 0.171   | 0.174 | 0.176 | 0.179 | 0.182 | 0.185 | 0.189 | 0.193 | 0.198 | 0.202 | 0.206 | 0.21  | 0.214 | 0.218 | 0.222 | 0.227 |
| Rio de Janeiro                  | 0.342 | 0.347 | 0.352 | 0.357 | 0.362   | 0.367 | 0.373 | 0.378 | 0.383 | 0.389 | 0.395 | 0.402 | 0.409 | 0.416 | 0.422 | 0.429 | 0.436 | 0.442 | 0.449 | 0.456 |
| Rio Grande do Norte             | 0.184 | 0.187 | 0.19  | 0.193 | 0.196   | 0.199 | 0.202 | 0.205 | 0.208 | 0.211 | 0.215 | 0.219 | 0.223 | 0.227 | 0.231 | 0.235 | 0.24  | 0.244 | 0.25  | 0.254 |
| Rio Grande do Sul               | 0.314 | 0.318 | 0.323 | 0.327 | 0.331   | 0.336 | 0.34  | 0.345 | 0.349 | 0.354 | 0.36  | 0.366 | 0.372 | 0.378 | 0.384 | 0.391 | 0.398 | 0.405 | 0.412 | 0.419 |
| Rondônia                        | 0.199 | 0.202 | 0.205 | 0.207 | 0.21    | 0.214 | 0.216 | 0.219 | 0.222 | 0.226 | 0.23  | 0.235 | 0.241 | 0.246 | 0.251 | 0.256 | 0.262 | 0.267 | 0.272 | 0.278 |
| Roraima                         | 0.205 | 0.208 | 0.212 | 0.215 | 0.219   | 0.222 | 0.225 | 0.228 | 0.232 | 0.236 | 0.241 | 0.246 | 0.252 | 0.258 | 0.263 | 0.269 | 0.275 | 0.28  | 0.285 | 0.29  |
| Santa Catarina                  | 0.296 | 0.3   | 0.304 | 0.308 | 0.312   | 0.316 | 0.32  | 0.325 | 0.329 | 0.334 | 0.34  | 0.347 | 0.353 | 0.359 | 0.365 | 0.371 | 0.378 | 0.384 | 0.39  | 0.397 |
| São Paulo                       | 0.323 | 0.327 | 0.332 | 0.337 | 0.341   | 0.346 | 0.351 | 0.356 | 0.361 | 0.366 | 0.372 | 0.378 | 0.384 | 0.39  | 0.397 | 0.403 | 0.409 | 0.416 | 0.423 | 0.429 |
| Sergipe                         | 0.196 | 0.199 | 0.202 | 0.205 | 0.208   | 0.212 | 0.215 | 0.218 | 0.221 | 0.225 | 0.229 | 0.233 | 0.238 | 0.242 | 0.246 | 0.251 | 0.255 | 0.259 | 0.264 | 0.269 |
| Tocantins                       | 0.175 | 0.178 | 0.181 | 0.185 | 0.188   | 0.191 | 0.193 | 0.196 | 0.199 | 0.202 | 0.205 | 0.209 | 0.214 | 0.218 | 0.222 | 0.226 | 0.229 | 0.232 | 0.236 | 0.239 |
| Paraguay                        | 0.285 | 0.293 | 0.3   | 0.307 | 0.312   | 0.317 | 0.319 | 0.32  | 0.32  | 0.318 | 0.318 | 0.319 | 0.321 | 0.323 | 0.326 | 0.33  | 0.334 | 0.338 | 0.341 | 0.346 |
| North Africa and Middle East    | 0.182 | 0.186 | 0.19  | 0.195 | 0.199   | 0.204 | 0.209 | 0.214 | 0.219 | 0.224 | 0.23  | 0.236 | 0.242 | 0.248 | 0.255 | 0.261 | 0.269 | 0.276 | 0.283 | 0.29  |
| North Africa and Middle East    | 0.182 | 0.186 | 0.19  | 0.195 | 0.199   | 0.204 | 0.209 | 0.214 | 0.219 | 0.224 | 0.23  | 0.236 | 0.242 | 0.248 | 0.255 | 0.261 | 0.269 | 0.276 | 0.283 | 0.29  |
| Afghanistan                     | 0.078 | 0.08  | 0.081 | 0.083 | 0.085   | 0.087 | 0.089 | 0.09  | 0.092 | 0.094 | 0.096 | 0.098 | 0.1   | 0.101 | 0.103 | 0.105 | 0.106 | 0.108 | 0.11  | 0.111 |
| Algeria                         | 0.194 | 0.198 | 0.202 | 0.207 | 0.212   | 0.217 | 0.222 | 0.228 | 0.234 | 0.241 | 0.249 | 0.255 | 0.26  | 0.265 | 0.271 | 0.278 | 0.283 | 0.288 | 0.293 | 0.298 |
| Bahrain                         | 0.226 | 0.232 | 0.238 | 0.244 | 0.25    | 0.257 | 0.264 | 0.272 | 0.28  | 0.289 | 0.298 | 0.309 | 0.321 | 0.334 | 0.347 | 0.36  | 0.372 | 0.384 | 0.393 | 0.404 |
| Egypt                           | 0.178 | 0.182 | 0.186 | 0.189 | 0.191   | 0.193 | 0.196 | 0.198 | 0.201 | 0.204 | 0.209 | 0.215 | 0.221 | 0.227 | 0.234 | 0.242 | 0.25  | 0.259 | 0.267 | 0.275 |
| Iran                            | 0.166 | 0.17  | 0.174 | 0.178 | 0.182   | 0.186 | 0.192 | 0.199 | 0.206 | 0.213 | 0.222 | 0.235 | 0.246 | 0.254 | 0.261 | 0.27  | 0.281 | 0.293 | 0.302 | 0.311 |
| Iraq                            | 0.151 | 0.155 | 0.159 | 0.165 | 0.172   | 0.177 | 0.183 | 0.188 | 0.194 | 0.2   | 0.207 | 0.214 | 0.221 | 0.227 | 0.234 | 0.241 | 0.247 | 0.254 | 0.26  | 0.267 |
| Jordan                          | 0.054 | 0.056 | 0.057 | 0.059 | 0.06    | 0.077 | 0.106 | 0.129 | 0.148 | 0.16  | 0.167 | 0.177 | 0.195 | 0.214 | 0.228 | 0.24  | 0.252 | 0.263 | 0.276 | 0.289 |
| Kuwait                          | 0.278 | 0.286 | 0.294 | 0.303 | 0.311   | 0.319 | 0.328 | 0.334 | 0.337 | 0.336 | 0.336 | 0.332 | 0.324 | 0.321 | 0.327 | 0.331 | 0.33  | 0.328 | 0.345 | 0.38  |
| Lebanon                         | 0.154 | 0.157 | 0.161 | 0.166 | 0.172   | 0.177 | 0.183 | 0.188 | 0.194 | 0.199 | 0.204 | 0.21  | 0.217 | 0.224 | 0.232 | 0.242 | 0.251 | 0.261 | 0.272 | 0.283 |
| Libya                           | 0.183 | 0.19  | 0.198 | 0.204 | 0.211   | 0.219 | 0.227 | 0.236 | 0.243 | 0.25  | 0.259 | 0.267 | 0.275 | 0.281 | 0.288 | 0.296 | 0.304 | 0.312 | 0.32  | 0.323 |
| Morocco                         | 0.136 | 0.138 | 0.141 | 0.144 | 0.146   | 0.149 | 0.152 | 0.154 | 0.157 | 0.16  | 0.163 | 0.167 | 0.172 | 0.177 | 0.183 | 0.189 | 0.195 | 0.202 | 0.209 | 0.216 |
| Palestine                       | 0.097 | 0.101 | 0.105 | 0.109 | 0.114   | 0.118 | 0.123 | 0.129 | 0.134 | 0.14  | 0.147 | 0.153 | 0.16  | 0.167 | 0.175 | 0.183 | 0.191 | 0.198 | 0.206 | 0.215 |
| Oman                            | 0.141 | 0.144 | 0.148 | 0.152 | 0.157</ |       |       |       |       |       |       |       |       |       |       |       |       |       |       |       |

**Appendix Table 8. Socio-Demographic Index values for all estimated GBD 2017 locations, 1950-1969**

| Location                               | 1950  | 1951  | 1952  | 1953  | 1954  | 1955  | 1956  | 1957  | 1958  | 1959  | 1960  | 1961  | 1962  | 1963  | 1964  | 1965  | 1966  | 1967  | 1968  | 1969  |
|----------------------------------------|-------|-------|-------|-------|-------|-------|-------|-------|-------|-------|-------|-------|-------|-------|-------|-------|-------|-------|-------|-------|
| Yemen                                  | 0.075 | 0.077 | 0.079 | 0.081 | 0.083 | 0.085 | 0.088 | 0.09  | 0.093 | 0.095 | 0.097 | 0.099 | 0.102 | 0.104 | 0.106 | 0.108 | 0.111 | 0.114 | 0.116 | 0.118 |
| South Asia                             | 0.171 | 0.173 | 0.175 | 0.177 | 0.18  | 0.182 | 0.183 | 0.184 | 0.185 | 0.186 | 0.188 | 0.19  | 0.192 | 0.195 | 0.197 | 0.199 | 0.202 | 0.204 | 0.208 | 0.214 |
| South Asia                             | 0.171 | 0.173 | 0.175 | 0.177 | 0.18  | 0.182 | 0.183 | 0.184 | 0.185 | 0.186 | 0.188 | 0.19  | 0.192 | 0.195 | 0.197 | 0.199 | 0.202 | 0.204 | 0.208 | 0.214 |
| Bangladesh                             | 0.045 | 0.046 | 0.046 | 0.047 | 0.047 | 0.047 | 0.048 | 0.048 | 0.048 | 0.049 | 0.049 | 0.05  | 0.05  | 0.051 | 0.051 | 0.052 | 0.053 | 0.053 | 0.053 | 0.054 |
| Bhutan                                 | 0.112 | 0.115 | 0.118 | 0.122 | 0.126 | 0.13  | 0.134 | 0.138 | 0.142 | 0.146 | 0.151 | 0.156 | 0.161 | 0.165 | 0.17  | 0.175 | 0.181 | 0.186 | 0.191 | 0.197 |
| India                                  | 0.175 | 0.177 | 0.18  | 0.182 | 0.185 | 0.187 | 0.189 | 0.189 | 0.19  | 0.191 | 0.194 | 0.196 | 0.199 | 0.201 | 0.204 | 0.206 | 0.209 | 0.212 | 0.215 | 0.22  |
| Andhra Pradesh                         | 0.14  | 0.142 | 0.143 | 0.145 | 0.147 | 0.148 | 0.148 | 0.146 | 0.144 | 0.143 | 0.143 | 0.145 | 0.146 | 0.146 | 0.146 | 0.146 | 0.148 | 0.149 | 0.152 | 0.158 |
| Arunachal Pradesh                      | 0.145 | 0.147 | 0.149 | 0.151 | 0.153 | 0.155 | 0.155 | 0.153 | 0.152 | 0.15  | 0.151 | 0.153 | 0.155 | 0.157 | 0.159 | 0.16  | 0.163 | 0.167 | 0.173 | 0.179 |
| Assam                                  | 0.17  | 0.172 | 0.175 | 0.178 | 0.181 | 0.183 | 0.185 | 0.186 | 0.186 | 0.188 | 0.191 | 0.194 | 0.197 | 0.201 | 0.205 | 0.209 | 0.212 | 0.213 | 0.215 | 0.218 |
| Bihar                                  | 0.153 | 0.155 | 0.157 | 0.159 | 0.162 | 0.164 | 0.166 | 0.167 | 0.168 | 0.17  | 0.172 | 0.174 | 0.177 | 0.179 | 0.181 | 0.183 | 0.185 | 0.187 | 0.189 | 0.193 |
| Chhattisgarh                           | 0.168 | 0.17  | 0.172 | 0.173 | 0.175 | 0.177 | 0.178 | 0.178 | 0.177 | 0.177 | 0.178 | 0.18  | 0.181 | 0.183 | 0.183 | 0.184 | 0.186 | 0.188 | 0.191 | 0.197 |
| Delhi                                  | 0.295 | 0.3   | 0.304 | 0.31  | 0.315 | 0.319 | 0.323 | 0.324 | 0.326 | 0.329 | 0.334 | 0.34  | 0.346 | 0.351 | 0.356 | 0.361 | 0.367 | 0.374 | 0.381 | 0.387 |
| Goa                                    | 0.278 | 0.282 | 0.285 | 0.291 | 0.295 | 0.299 | 0.302 | 0.305 | 0.308 | 0.311 | 0.316 | 0.32  | 0.324 | 0.328 | 0.332 | 0.336 | 0.34  | 0.346 | 0.352 | 0.359 |
| Gujarat                                | 0.189 | 0.192 | 0.194 | 0.197 | 0.2   | 0.202 | 0.204 | 0.206 | 0.207 | 0.208 | 0.209 | 0.212 | 0.214 | 0.216 | 0.217 | 0.219 | 0.222 | 0.226 | 0.231 | 0.239 |
| Haryana                                | 0.192 | 0.194 | 0.197 | 0.199 | 0.202 | 0.204 | 0.206 | 0.207 | 0.208 | 0.209 | 0.212 | 0.214 | 0.216 | 0.217 | 0.217 | 0.219 | 0.222 | 0.226 | 0.231 | 0.237 |
| Himachal Pradesh                       | 0.168 | 0.17  | 0.172 | 0.175 | 0.177 | 0.179 | 0.181 | 0.182 | 0.183 | 0.184 | 0.186 | 0.188 | 0.189 | 0.191 | 0.192 | 0.193 | 0.195 | 0.198 | 0.202 | 0.207 |
| Jammu and Kashmir                      | 0.176 | 0.178 | 0.181 | 0.183 | 0.186 | 0.189 | 0.191 | 0.193 | 0.195 | 0.197 | 0.2   | 0.203 | 0.205 | 0.208 | 0.21  | 0.212 | 0.215 | 0.218 | 0.222 | 0.228 |
| Jharkhand                              | 0.171 | 0.173 | 0.175 | 0.177 | 0.179 | 0.181 | 0.181 | 0.181 | 0.181 | 0.181 | 0.182 | 0.184 | 0.185 | 0.187 | 0.188 | 0.188 | 0.19  | 0.192 | 0.195 | 0.2   |
| Karnataka                              | 0.167 | 0.169 | 0.171 | 0.174 | 0.176 | 0.178 | 0.18  | 0.18  | 0.18  | 0.18  | 0.183 | 0.185 | 0.187 | 0.19  | 0.192 | 0.193 | 0.196 | 0.201 | 0.207 | 0.214 |
| Kerala                                 | 0.231 | 0.235 | 0.238 | 0.244 | 0.248 | 0.252 | 0.256 | 0.259 | 0.263 | 0.267 | 0.272 | 0.277 | 0.281 | 0.286 | 0.291 | 0.296 | 0.3   | 0.305 | 0.308 | 0.312 |
| Madhya Pradesh                         | 0.148 | 0.15  | 0.152 | 0.154 | 0.156 | 0.158 | 0.159 | 0.158 | 0.158 | 0.157 | 0.159 | 0.161 | 0.162 | 0.163 | 0.163 | 0.165 | 0.166 | 0.167 | 0.168 | 0.172 |
| Maharashtra                            | 0.198 | 0.2   | 0.203 | 0.206 | 0.209 | 0.211 | 0.213 | 0.213 | 0.214 | 0.214 | 0.217 | 0.219 | 0.222 | 0.225 | 0.227 | 0.229 | 0.233 | 0.238 | 0.244 | 0.252 |
| Manipur                                | 0.184 | 0.187 | 0.19  | 0.193 | 0.196 | 0.199 | 0.201 | 0.203 | 0.205 | 0.207 | 0.21  | 0.214 | 0.218 | 0.222 | 0.225 | 0.229 | 0.232 | 0.236 | 0.24  | 0.246 |
| Meghalaya                              | 0.168 | 0.171 | 0.174 | 0.177 | 0.18  | 0.183 | 0.185 | 0.186 | 0.187 | 0.188 | 0.191 | 0.195 | 0.198 | 0.201 | 0.204 | 0.207 | 0.21  | 0.214 | 0.218 | 0.224 |
| Mizoram                                | 0.194 | 0.197 | 0.201 | 0.205 | 0.209 | 0.212 | 0.215 | 0.217 | 0.219 | 0.222 | 0.226 | 0.231 | 0.235 | 0.239 | 0.244 | 0.249 | 0.252 | 0.255 | 0.258 | 0.264 |
| Nagaland                               | 0.203 | 0.206 | 0.21  | 0.213 | 0.217 | 0.221 | 0.225 | 0.227 | 0.23  | 0.233 | 0.238 | 0.243 | 0.248 | 0.253 | 0.258 | 0.263 | 0.267 | 0.27  | 0.273 | 0.278 |
| Odisha                                 | 0.147 | 0.149 | 0.151 | 0.153 | 0.155 | 0.157 | 0.158 | 0.159 | 0.16  | 0.16  | 0.162 | 0.165 | 0.167 | 0.169 | 0.171 | 0.173 | 0.175 | 0.178 | 0.181 | 0.185 |
| Punjab                                 | 0.218 | 0.221 | 0.224 | 0.228 | 0.232 | 0.235 | 0.238 | 0.241 | 0.244 | 0.247 | 0.251 | 0.255 | 0.258 | 0.261 | 0.265 | 0.269 | 0.273 | 0.278 | 0.283 | 0.289 |
| Rajasthan                              | 0.131 | 0.132 | 0.134 | 0.136 | 0.138 | 0.14  | 0.14  | 0.14  | 0.14  | 0.139 | 0.141 | 0.143 | 0.144 | 0.146 | 0.147 | 0.147 | 0.149 | 0.152 | 0.156 | 0.161 |
| Sikkim                                 | 0.16  | 0.163 | 0.165 | 0.167 | 0.17  | 0.171 | 0.173 | 0.173 | 0.173 | 0.173 | 0.176 | 0.178 | 0.181 | 0.183 | 0.186 | 0.188 | 0.191 | 0.194 | 0.198 | 0.204 |
| Tamil Nadu                             | 0.189 | 0.192 | 0.194 | 0.198 | 0.201 | 0.203 | 0.205 | 0.207 | 0.208 | 0.21  | 0.213 | 0.216 | 0.219 | 0.222 | 0.225 | 0.228 | 0.23  | 0.233 | 0.238 | 0.244 |
| Telangana                              | 0.151 | 0.153 | 0.155 | 0.157 | 0.16  | 0.161 | 0.162 | 0.163 | 0.163 | 0.163 | 0.165 | 0.167 | 0.168 | 0.17  | 0.171 | 0.172 | 0.174 | 0.176 | 0.179 | 0.184 |
| Tripura                                | 0.164 | 0.167 | 0.17  | 0.173 | 0.176 | 0.178 | 0.179 | 0.178 | 0.177 | 0.176 | 0.179 | 0.182 | 0.185 | 0.189 | 0.192 | 0.194 | 0.198 | 0.201 | 0.206 | 0.212 |
| Uttar Pradesh                          | 0.152 | 0.154 | 0.156 | 0.158 | 0.161 | 0.163 | 0.164 | 0.165 | 0.166 | 0.168 | 0.17  | 0.172 | 0.175 | 0.177 | 0.179 | 0.181 | 0.183 | 0.185 | 0.188 | 0.192 |
| Uttarakhand                            | 0.183 | 0.185 | 0.187 | 0.189 | 0.191 | 0.193 | 0.194 | 0.194 | 0.194 | 0.195 | 0.196 | 0.198 | 0.2   | 0.201 | 0.202 | 0.203 | 0.204 | 0.206 | 0.21  | 0.215 |
| West Bengal                            | 0.19  | 0.193 | 0.196 | 0.199 | 0.202 | 0.204 | 0.205 | 0.205 | 0.204 | 0.204 | 0.207 | 0.21  | 0.213 | 0.217 | 0.22  | 0.223 | 0.226 | 0.226 | 0.227 | 0.231 |
| Union Territories other than Delhi     | 0.236 | 0.24  | 0.243 | 0.245 | 0.249 | 0.252 | 0.253 | 0.254 | 0.253 | 0.253 | 0.256 | 0.259 | 0.262 | 0.265 | 0.267 | 0.269 | 0.273 | 0.277 | 0.283 | 0.291 |
| Nepal                                  | 0.118 | 0.12  | 0.122 | 0.124 | 0.126 | 0.127 | 0.129 | 0.131 | 0.133 | 0.135 | 0.137 | 0.139 | 0.141 | 0.142 | 0.145 | 0.147 | 0.149 | 0.151 | 0.153 | 0.154 |
| Pakistan                               | 0.185 | 0.186 | 0.188 | 0.19  | 0.192 | 0.194 | 0.196 | 0.198 | 0.2   | 0.202 | 0.205 | 0.207 | 0.21  | 0.213 | 0.217 | 0.221 | 0.225 | 0.229 | 0.233 | 0.237 |
| Southeast Asia, East Asia, and Oceania | 0.19  | 0.194 | 0.199 | 0.204 | 0.21  | 0.215 | 0.219 | 0.223 | 0.227 | 0.232 | 0.236 | 0.239 | 0.242 | 0.247 | 0.253 | 0.259 | 0.264 | 0.269 | 0.275 | 0.284 |
| East Asia                              | 0.17  | 0.175 | 0.182 | 0.188 | 0.194 | 0.199 | 0.203 | 0.208 | 0.212 | 0.217 | 0.222 | 0.222 | 0.224 | 0.227 | 0.233 | 0.239 | 0.245 | 0.249 | 0.255 | 0.265 |
| China                                  | 0.165 | 0.171 | 0.177 | 0.183 | 0.189 | 0.194 | 0.198 | 0.202 | 0.207 | 0.212 | 0.216 | 0.216 | 0.218 | 0.221 | 0.226 | 0.233 | 0.238 | 0.242 | 0.248 | 0.258 |
| North Korea                            | 0.259 | 0.257 | 0.26  | 0.268 | 0.276 | 0.283 | 0.29  | 0.297 | 0.304 | 0.311 | 0.318 | 0.325 | 0.331 | 0.339 | 0.345 | 0.352 | 0.361 | 0.37  | 0.379 | 0.389 |
| Taiwan (Province of China)             | 0.345 | 0.345 | 0.357 | 0.366 | 0.368 | 0.371 | 0.381 | 0.39  | 0.391 | 0.392 | 0.397 | 0.4   | 0.406 | 0.418 | 0.43  | 0.443 | 0.456 | 0.467 | 0.474 | 0.479 |
| Oceania                                | 0.253 | 0.257 | 0.26  | 0.263 | 0.266 | 0.27  | 0.273 | 0.276 | 0.279 | 0.283 | 0.286 | 0.29  | 0.294 | 0.298 | 0.303 | 0.307 | 0.312 | 0.316 | 0.32  | 0.325 |
| American Samoa                         | 0.452 | 0.458 | 0.465 | 0.471 | 0.477 | 0.483 | 0.488 | 0.491 | 0.493 | 0.495 | 0.497 | 0.497 | 0.497 | 0.497 | 0.498 | 0.501 | 0.505 | 0.512 | 0.52  | 0.529 |
| Federated States of Micronesia         | 0.249 | 0.251 | 0.254 | 0.257 | 0.26  | 0.262 | 0.265 | 0.269 | 0.272 | 0.275 | 0.278 | 0.282 | 0.285 | 0.289 | 0.294 | 0.298 | 0.303 | 0.308 | 0.313 | 0.319 |
| Fiji                                   | 0.313 | 0.315 | 0.317 | 0.32  | 0.321 | 0.323 | 0.324 | 0.326 | 0.328 | 0.331 | 0.335 | 0.341 | 0.348 | 0.358 | 0.369 | 0.377 | 0.386 | 0.394 | 0.402 | 0.409 |
| Guam                                   | 0.551 | 0.549 | 0.542 | 0.531 | 0.517 | 0.501 | 0.487 | 0.478 | 0.467 | 0.458 | 0.463 | 0.482 | 0.505 | 0.526 | 0.544 | 0.559 | 0.573 | 0.583 | 0.59  | 0.592 |
| Kiribati                               | 0.249 | 0.251 | 0.253 | 0.255 | 0.257 | 0.259 | 0.261 | 0.264 | 0.266 | 0.268 | 0.27  | 0.274 | 0.277 | 0.281 | 0.285 | 0.289 | 0.293 | 0.297 | 0.301 | 0.306 |
| Marshall Islands                       | 0.221 | 0.224 | 0.227 | 0.229 | 0.232 | 0.235 | 0.237 | 0.24  | 0.242 | 0.244 | 0.247 | 0.249 | 0.252 | 0.254 | 0.256 | 0.258 | 0.26  | 0.262 | 0.264 | 0.267 |
| Northern Mariana Islands               | 0.457 | 0.463 | 0.47  | 0.476 | 0.483 | 0.489 | 0.496 | 0.503 | 0.51  | 0.517 | 0.524 | 0.531 | 0.538 | 0.544 | 0.549 | 0.554 | 0.56  | 0.566 | 0.572 | 0.578 |
| Papua New Guinea                       | 0.186 | 0.189 | 0.192 | 0.195 | 0.199 | 0.202 | 0.205 | 0.209 | 0.212 | 0.215 | 0.218 | 0.221 | 0.224 | 0.227 | 0.231 | 0.234 | 0.238 | 0.242 | 0.246 | 0.25  |
| Samoa                                  | 0.311 | 0.315 | 0.318 | 0.32  | 0.322 | 0.324 | 0.327 | 0.331 | 0.335 | 0.34  | 0.346 | 0.353 | 0.361 | 0.368 | 0.374 | 0.38  | 0.386 | 0.393 | 0.398 | 0.403 |
| Solomon Islands                        | 0.181 | 0.183 | 0.185 | 0.187 | 0.19  | 0.192 | 0.195 | 0.197 | 0.2   | 0.203 | 0.206 | 0.209 | 0.212 | 0.216 | 0.22  | 0.223 | 0.227 | 0.231 | 0.235 | 0.238 |
| Tonga                                  | 0.278 | 0.282 | 0.287 | 0.292 | 0.297 | 0.302 | 0.307 | 0.313 | 0.318 | 0.322 | 0.328 | 0.333 | 0.339 | 0.344 | 0.349 | 0.354 | 0.359 | 0.363 | 0.368 | 0.372 |
| Vanuatu                                | 0.216 | 0.218 | 0.221 | 0.224 | 0.227 | 0.23  | 0.234 | 0.237 | 0.241 | 0.244 | 0.248 | 0.251 | 0.256 | 0.26  | 0.265 | 0.269 | 0.274 | 0.278 | 0.283 | 0.287 |
| Southeast Asia                         | 0.216 | 0.22  | 0.224 | 0.    |       |       |       |       |       |       |       |       |       |       |       |       |       |       |       |       |



**Appendix Table 8. Socio-Demographic Index values for all estimated GBD 2017 locations, 1950-1969**

| Location                   | 1950  | 1951  | 1952  | 1953  | 1954  | 1955  | 1956  | 1957  | 1958  | 1959  | 1960  | 1961  | 1962  | 1963  | 1964  | 1965  | 1966  | 1967  | 1968  | 1969  |
|----------------------------|-------|-------|-------|-------|-------|-------|-------|-------|-------|-------|-------|-------|-------|-------|-------|-------|-------|-------|-------|-------|
| Philippines                | 0.298 | 0.304 | 0.31  | 0.317 | 0.324 | 0.33  | 0.336 | 0.343 | 0.352 | 0.36  | 0.367 | 0.374 | 0.382 | 0.388 | 0.393 | 0.398 | 0.402 | 0.406 | 0.41  | 0.414 |
| Sri Lanka                  | 0.28  | 0.286 | 0.29  | 0.295 | 0.3   | 0.305 | 0.309 | 0.313 | 0.316 | 0.32  | 0.324 | 0.328 | 0.333 | 0.339 | 0.345 | 0.352 | 0.36  | 0.368 | 0.375 | 0.38  |
| Seychelles                 | 0.297 | 0.302 | 0.305 | 0.307 | 0.309 | 0.31  | 0.311 | 0.313 | 0.314 | 0.315 | 0.316 | 0.316 | 0.318 | 0.321 | 0.325 | 0.329 | 0.333 | 0.339 | 0.345 | 0.351 |
| Thailand                   | 0.245 | 0.249 | 0.252 | 0.256 | 0.259 | 0.263 | 0.267 | 0.271 | 0.276 | 0.281 | 0.286 | 0.291 | 0.296 | 0.302 | 0.309 | 0.315 | 0.322 | 0.328 | 0.333 | 0.338 |
| Timor-Leste                | 0.082 | 0.085 | 0.089 | 0.092 | 0.095 | 0.098 | 0.102 | 0.105 | 0.108 | 0.113 | 0.117 | 0.12  | 0.125 | 0.129 | 0.134 | 0.139 | 0.144 | 0.149 | 0.155 | 0.161 |
| Vietnam                    | 0.194 | 0.197 | 0.201 | 0.205 | 0.209 | 0.213 | 0.217 | 0.221 | 0.226 | 0.23  | 0.235 | 0.24  | 0.246 | 0.252 | 0.258 | 0.264 | 0.269 | 0.273 | 0.276 | 0.28  |
| Sub-Saharan Africa         | 0.14  | 0.143 | 0.146 | 0.149 | 0.152 | 0.155 | 0.158 | 0.161 | 0.165 | 0.168 | 0.172 | 0.176 | 0.18  | 0.184 | 0.188 | 0.191 | 0.195 | 0.199 | 0.203 | 0.207 |
| Central sub-Saharan Africa | 0.118 | 0.121 | 0.123 | 0.126 | 0.128 | 0.13  | 0.132 | 0.135 | 0.137 | 0.139 | 0.142 | 0.144 | 0.148 | 0.151 | 0.154 | 0.158 | 0.163 | 0.167 | 0.172 | 0.176 |
| Angola                     | 0.11  | 0.111 | 0.112 | 0.113 | 0.112 | 0.112 | 0.111 | 0.11  | 0.11  | 0.11  | 0.11  | 0.11  | 0.111 | 0.111 | 0.111 | 0.111 | 0.113 | 0.115 | 0.118 | 0.122 |
| Central African Republic   | 0.107 | 0.11  | 0.112 | 0.114 | 0.116 | 0.118 | 0.121 | 0.122 | 0.124 | 0.126 | 0.128 | 0.131 | 0.134 | 0.135 | 0.137 | 0.139 | 0.143 | 0.145 | 0.147 | 0.149 |
| Congo (Brazzaville)        | 0.137 | 0.14  | 0.144 | 0.147 | 0.151 | 0.155 | 0.158 | 0.162 | 0.166 | 0.17  | 0.174 | 0.179 | 0.183 | 0.188 | 0.193 | 0.197 | 0.202 | 0.207 | 0.211 | 0.216 |
| DR Congo                   | 0.111 | 0.114 | 0.117 | 0.12  | 0.123 | 0.126 | 0.129 | 0.132 | 0.135 | 0.138 | 0.141 | 0.143 | 0.147 | 0.151 | 0.154 | 0.158 | 0.163 | 0.167 | 0.172 | 0.177 |
| Equatorial Guinea          | 0.055 | 0.057 | 0.057 | 0.057 | 0.056 | 0.053 | 0.049 | 0.04  | 0.032 | 0.033 | 0.034 | 0.036 | 0.037 | 0.039 | 0.04  | 0.042 | 0.043 | 0.045 | 0.046 | 0.048 |
| Gabon                      | 0.146 | 0.149 | 0.153 | 0.156 | 0.159 | 0.162 | 0.165 | 0.169 | 0.173 | 0.177 | 0.182 | 0.188 | 0.194 | 0.201 | 0.208 | 0.216 | 0.226 | 0.234 | 0.24  | 0.245 |
| Eastern sub-Saharan Africa | 0.099 | 0.102 | 0.103 | 0.105 | 0.107 | 0.11  | 0.112 | 0.115 | 0.118 | 0.12  | 0.123 | 0.126 | 0.129 | 0.133 | 0.135 | 0.138 | 0.141 | 0.144 | 0.148 | 0.152 |
| Burundi                    | 0.081 | 0.084 | 0.086 | 0.088 | 0.09  | 0.093 | 0.095 | 0.098 | 0.101 | 0.104 | 0.107 | 0.11  | 0.113 | 0.116 | 0.119 | 0.122 | 0.125 | 0.129 | 0.133 | 0.136 |
| Comoros                    | 0.131 | 0.133 | 0.134 | 0.135 | 0.136 | 0.137 | 0.137 | 0.137 | 0.138 | 0.139 | 0.14  | 0.141 | 0.143 | 0.145 | 0.147 | 0.148 | 0.149 | 0.15  | 0.151 | 0.153 |
| Djibouti                   | 0.14  | 0.142 | 0.145 | 0.147 | 0.15  | 0.154 | 0.158 | 0.163 | 0.167 | 0.17  | 0.172 | 0.174 | 0.176 | 0.178 | 0.18  | 0.181 | 0.184 | 0.187 | 0.19  | 0.194 |
| Eritrea                    | 0.053 | 0.056 | 0.058 | 0.06  | 0.063 | 0.066 | 0.069 | 0.071 | 0.074 | 0.077 | 0.08  | 0.084 | 0.087 | 0.09  | 0.094 | 0.097 | 0.101 | 0.104 | 0.108 | 0.112 |
| Ethiopia                   | 0.053 | 0.055 | 0.057 | 0.059 | 0.06  | 0.062 | 0.064 | 0.066 | 0.067 | 0.069 | 0.071 | 0.073 | 0.076 | 0.078 | 0.079 | 0.08  | 0.082 | 0.084 | 0.086 | 0.087 |
| Kenya                      | 0.08  | 0.085 | 0.089 | 0.094 | 0.099 | 0.104 | 0.11  | 0.116 | 0.122 | 0.126 | 0.13  | 0.134 | 0.14  | 0.146 | 0.151 | 0.155 | 0.161 | 0.169 | 0.179 | 0.19  |
| Baringo                    | 0.052 | 0.058 | 0.063 | 0.069 | 0.075 | 0.081 | 0.088 | 0.094 | 0.099 | 0.102 | 0.104 | 0.107 | 0.111 | 0.116 | 0.117 | 0.116 | 0.118 | 0.125 | 0.135 | 0.145 |
| Bomet                      | 0.047 | 0.048 | 0.049 | 0.05  | 0.051 | 0.052 | 0.053 | 0.054 | 0.055 | 0.056 | 0.057 | 0.058 | 0.059 | 0.06  | 0.061 | 0.062 | 0.063 | 0.087 | 0.112 | 0.133 |
| Bungoma                    | 0.047 | 0.049 | 0.05  | 0.05  | 0.052 | 0.053 | 0.055 | 0.057 | 0.082 | 0.088 | 0.094 | 0.101 | 0.109 | 0.117 | 0.123 | 0.127 | 0.133 | 0.143 | 0.156 | 0.169 |
| Busia                      | 0.049 | 0.05  | 0.051 | 0.052 | 0.053 | 0.054 | 0.055 | 0.056 | 0.066 | 0.071 | 0.074 | 0.08  | 0.088 | 0.101 | 0.111 | 0.12  | 0.129 | 0.143 | 0.159 | 0.175 |
| Elgeyo Marakwet            | 0.057 | 0.061 | 0.065 | 0.069 | 0.074 | 0.078 | 0.084 | 0.089 | 0.094 | 0.097 | 0.1   | 0.103 | 0.108 | 0.112 | 0.116 | 0.118 | 0.123 | 0.131 | 0.141 | 0.152 |
| Embu                       | 0.095 | 0.1   | 0.103 | 0.107 | 0.111 | 0.116 | 0.12  | 0.126 | 0.131 | 0.136 | 0.141 | 0.146 | 0.151 | 0.157 | 0.163 | 0.168 | 0.174 | 0.182 | 0.191 | 0.2   |
| Garissa                    | 0.042 | 0.044 | 0.045 | 0.046 | 0.048 | 0.05  | 0.052 | 0.054 | 0.055 | 0.057 | 0.058 | 0.06  | 0.062 | 0.064 | 0.066 | 0.068 | 0.07  | 0.075 | 0.079 | 0.085 |
| Homa Bay                   | 0.041 | 0.042 | 0.043 | 0.044 | 0.045 | 0.046 | 0.047 | 0.048 | 0.049 | 0.049 | 0.05  | 0.051 | 0.052 | 0.053 | 0.054 | 0.055 | 0.061 | 0.09  | 0.113 | 0.132 |
| Isiolo                     | 0.101 | 0.104 | 0.106 | 0.109 | 0.112 | 0.115 | 0.118 | 0.122 | 0.126 | 0.129 | 0.132 | 0.135 | 0.139 | 0.143 | 0.148 | 0.152 | 0.157 | 0.164 | 0.172 | 0.18  |
| Kajiado                    | 0.149 | 0.155 | 0.159 | 0.163 | 0.168 | 0.173 | 0.179 | 0.184 | 0.19  | 0.194 | 0.198 | 0.202 | 0.207 | 0.212 | 0.215 | 0.218 | 0.222 | 0.228 | 0.235 | 0.243 |
| Kakamega                   | 0.047 | 0.049 | 0.049 | 0.05  | 0.051 | 0.052 | 0.066 | 0.077 | 0.086 | 0.092 | 0.097 | 0.104 | 0.111 | 0.119 | 0.126 | 0.131 | 0.138 | 0.149 | 0.162 | 0.175 |
| Kericho                    | 0.041 | 0.043 | 0.043 | 0.044 | 0.045 | 0.046 | 0.047 | 0.052 | 0.062 | 0.066 | 0.069 | 0.074 | 0.081 | 0.088 | 0.092 | 0.095 | 0.1   | 0.112 | 0.125 | 0.137 |
| Kiambu                     | 0.099 | 0.106 | 0.112 | 0.118 | 0.125 | 0.133 | 0.141 | 0.149 | 0.156 | 0.163 | 0.169 | 0.176 | 0.183 | 0.191 | 0.197 | 0.203 | 0.21  | 0.22  | 0.231 | 0.244 |
| Kilifi                     | 0.098 | 0.102 | 0.104 | 0.107 | 0.11  | 0.113 | 0.117 | 0.121 | 0.124 | 0.126 | 0.129 | 0.132 | 0.135 | 0.139 | 0.141 | 0.143 | 0.146 | 0.151 | 0.158 | 0.165 |
| Kirinyaga                  | 0.072 | 0.077 | 0.081 | 0.084 | 0.089 | 0.094 | 0.1   | 0.106 | 0.111 | 0.115 | 0.12  | 0.125 | 0.13  | 0.137 | 0.144 | 0.151 | 0.159 | 0.17  | 0.183 | 0.196 |
| Kisii                      | 0.058 | 0.062 | 0.066 | 0.07  | 0.075 | 0.08  | 0.086 | 0.092 | 0.098 | 0.102 | 0.107 | 0.112 | 0.118 | 0.125 | 0.131 | 0.135 | 0.142 | 0.152 | 0.163 | 0.175 |
| Kisumu                     | 0.043 | 0.045 | 0.046 | 0.046 | 0.047 | 0.048 | 0.049 | 0.058 | 0.066 | 0.067 | 0.069 | 0.073 | 0.08  | 0.088 | 0.094 | 0.097 | 0.105 | 0.119 | 0.135 | 0.15  |
| Kitui                      | 0.063 | 0.067 | 0.069 | 0.072 | 0.075 | 0.079 | 0.083 | 0.087 | 0.091 | 0.094 | 0.098 | 0.102 | 0.107 | 0.113 | 0.119 | 0.124 | 0.13  | 0.139 | 0.149 | 0.158 |
| Kwale                      | 0.08  | 0.083 | 0.085 | 0.087 | 0.089 | 0.092 | 0.095 | 0.098 | 0.101 | 0.104 | 0.106 | 0.109 | 0.112 | 0.116 | 0.12  | 0.124 | 0.129 | 0.136 | 0.144 | 0.154 |
| Laikipia                   | 0.038 | 0.04  | 0.041 | 0.045 | 0.053 | 0.06  | 0.067 | 0.074 | 0.08  | 0.083 | 0.087 | 0.091 | 0.096 | 0.103 | 0.108 | 0.111 | 0.118 | 0.129 | 0.142 | 0.155 |
| Lamu                       | 0.04  | 0.041 | 0.044 | 0.049 | 0.054 | 0.059 | 0.064 | 0.07  | 0.075 | 0.076 | 0.077 | 0.079 | 0.083 | 0.088 | 0.092 | 0.092 | 0.097 | 0.108 | 0.121 | 0.134 |
| Machakos                   | 0.085 | 0.09  | 0.093 | 0.097 | 0.101 | 0.106 | 0.111 | 0.117 | 0.122 | 0.126 | 0.13  | 0.135 | 0.141 | 0.147 | 0.152 | 0.157 | 0.163 | 0.172 | 0.184 | 0.196 |
| Makueni                    | 0.075 | 0.078 | 0.081 | 0.085 | 0.089 | 0.094 | 0.099 | 0.104 | 0.109 | 0.113 | 0.117 | 0.122 | 0.128 | 0.135 | 0.142 | 0.148 | 0.155 | 0.166 | 0.178 | 0.19  |
| Mandera                    | 0.03  | 0.031 | 0.032 | 0.033 | 0.034 | 0.036 | 0.037 | 0.039 | 0.04  | 0.04  | 0.041 | 0.041 | 0.042 | 0.044 | 0.045 | 0.046 | 0.047 | 0.052 | 0.057 | 0.063 |
| Marsabit                   | 0.085 | 0.089 | 0.09  | 0.092 | 0.094 | 0.097 | 0.1   | 0.103 | 0.105 | 0.108 | 0.11  | 0.112 | 0.115 | 0.118 | 0.121 | 0.124 | 0.128 | 0.133 | 0.139 | 0.145 |
| Meru                       | 0.088 | 0.093 | 0.096 | 0.099 | 0.104 | 0.108 | 0.113 | 0.118 | 0.123 | 0.127 | 0.131 | 0.135 | 0.14  | 0.145 | 0.15  | 0.154 | 0.16  | 0.168 | 0.177 | 0.187 |
| Migori                     | 0.041 | 0.042 | 0.043 | 0.044 | 0.045 | 0.046 | 0.047 | 0.048 | 0.049 | 0.05  | 0.051 | 0.052 | 0.053 | 0.062 | 0.072 | 0.075 | 0.086 | 0.103 | 0.12  | 0.136 |
| Mombasa                    | 0.103 | 0.111 | 0.113 | 0.116 | 0.12  | 0.125 | 0.13  | 0.136 | 0.141 | 0.146 | 0.151 | 0.156 | 0.162 | 0.168 | 0.174 | 0.18  | 0.187 | 0.195 | 0.204 | 0.214 |
| Murang'a                   | 0.098 | 0.104 | 0.109 | 0.115 | 0.121 | 0.128 | 0.135 | 0.142 | 0.149 | 0.154 | 0.159 | 0.165 | 0.171 | 0.178 | 0.183 | 0.188 | 0.193 | 0.202 | 0.211 | 0.221 |
| Nairobi                    | 0.13  | 0.14  | 0.146 | 0.151 | 0.159 | 0.167 | 0.176 | 0.185 | 0.194 | 0.202 | 0.21  | 0.219 | 0.228 | 0.237 | 0.246 | 0.254 | 0.265 | 0.277 | 0.289 | 0.302 |
| Nakuru                     | 0.076 | 0.083 | 0.085 | 0.088 | 0.092 | 0.097 | 0.102 | 0.108 | 0.113 | 0.117 | 0.122 | 0.126 | 0.131 | 0.137 | 0.142 | 0.146 | 0.151 | 0.159 | 0.167 | 0.175 |
| Nandi                      | 0.066 | 0.072 | 0.077 | 0.083 | 0.089 | 0.095 | 0.102 | 0.109 | 0.115 | 0.118 | 0.122 | 0.126 | 0.131 | 0.136 | 0.139 | 0.14  | 0.143 | 0.151 | 0.16  | 0.17  |
| Narok                      | 0.041 | 0.042 | 0.043 | 0.044 | 0.045 | 0.046 | 0.047 | 0.047 | 0.048 | 0.049 | 0.05  | 0.051 | 0.052 | 0.053 | 0.053 | 0.054 | 0.055 | 0.056 | 0.057 | 0.076 |
| Nyamira                    | 0.042 | 0.043 | 0.044 | 0.05  | 0.058 | 0.065 | 0.073 | 0.081 | 0.087 | 0.091 | 0.096 | 0.102 | 0.11  | 0.118 | 0.125 | 0.131 | 0.141 | 0.153 | 0.167 | 0.181 |
| Nyandarua                  | 0.045 | 0.047 | 0.048 | 0.048 | 0.05  | 0.051 | 0.052 | 0.053 | 0.054 | 0.055 | 0.056 | 0.057 | 0.063 | 0.079 | 0.091 | 0.101 | 0.113 | 0.131 | 0.149 | 0.167 |
| Nyeri                      | 0.077 | 0.084 | 0.088 | 0.094 | 0.1   | 0.106 | 0.113 | 0.12  | 0.126 | 0.131 | 0.136 | 0.142 | 0.148 | 0.156 | 0.163 | 0.168 | 0.176 | 0.188 | 0.201 | 0.215 |
| Samburu                    | 0.043 | 0.045 | 0.047 | 0.05  | 0.053 | 0.057 | 0     |       |       |       |       |       |       |       |       |       |       |       |       |       |



**Appendix Table 8. Socio-Demographic Index values for all estimated GBD 2017 locations, 1950-1969**

| Location                    | 1950  | 1951  | 1952  | 1953  | 1954  | 1955  | 1956  | 1957  | 1958  | 1959  | 1960  | 1961  | 1962  | 1963  | 1964  | 1965  | 1966  | 1967  | 1968  | 1969  |
|-----------------------------|-------|-------|-------|-------|-------|-------|-------|-------|-------|-------|-------|-------|-------|-------|-------|-------|-------|-------|-------|-------|
| Vihiga                      | 0.064 | 0.071 | 0.078 | 0.085 | 0.092 | 0.099 | 0.107 | 0.114 | 0.121 | 0.126 | 0.13  | 0.136 | 0.142 | 0.148 | 0.154 | 0.158 | 0.164 | 0.173 | 0.184 | 0.195 |
| Wajir                       | 0.041 | 0.042 | 0.043 | 0.044 | 0.046 | 0.048 | 0.049 | 0.051 | 0.053 | 0.053 | 0.054 | 0.055 | 0.057 | 0.059 | 0.06  | 0.06  | 0.061 | 0.065 | 0.07  | 0.075 |
| West Pokot                  | 0.064 | 0.067 | 0.069 | 0.072 | 0.075 | 0.078 | 0.082 | 0.086 | 0.089 | 0.092 | 0.094 | 0.097 | 0.1   | 0.104 | 0.107 | 0.109 | 0.113 | 0.119 | 0.126 | 0.133 |
| Madagascar                  | 0.125 | 0.127 | 0.128 | 0.129 | 0.13  | 0.132 | 0.134 | 0.136 | 0.138 | 0.141 | 0.142 | 0.144 | 0.146 | 0.147 | 0.147 | 0.147 | 0.147 | 0.148 | 0.15  | 0.153 |
| Malawi                      | 0.067 | 0.068 | 0.069 | 0.071 | 0.072 | 0.074 | 0.076 | 0.078 | 0.081 | 0.083 | 0.085 | 0.088 | 0.091 | 0.093 | 0.096 | 0.099 | 0.103 | 0.107 | 0.111 | 0.115 |
| Mozambique                  | 0.054 | 0.056 | 0.057 | 0.059 | 0.061 | 0.063 | 0.064 | 0.066 | 0.069 | 0.071 | 0.074 | 0.076 | 0.079 | 0.082 | 0.085 | 0.088 | 0.09  | 0.093 | 0.096 | 0.1   |
| Rwanda                      | 0.113 | 0.115 | 0.118 | 0.12  | 0.123 | 0.126 | 0.128 | 0.131 | 0.134 | 0.138 | 0.142 | 0.146 | 0.152 | 0.157 | 0.159 | 0.16  | 0.16  | 0.162 | 0.165 | 0.17  |
| Somalia                     | 0.079 | 0.08  | 0.082 | 0.084 | 0.085 | 0.087 | 0.089 | 0.091 | 0.093 | 0.095 | 0.096 | 0.099 | 0.101 | 0.103 | 0.104 | 0.105 | 0.107 | 0.109 | 0.111 | 0.112 |
| South Sudan                 | 0.104 | 0.106 | 0.107 | 0.109 | 0.11  | 0.112 | 0.113 | 0.115 | 0.116 | 0.118 | 0.12  | 0.121 | 0.123 | 0.125 | 0.127 | 0.129 | 0.13  | 0.132 | 0.134 | 0.136 |
| Tanzania                    | 0.101 | 0.105 | 0.107 | 0.11  | 0.113 | 0.116 | 0.119 | 0.122 | 0.125 | 0.128 | 0.132 | 0.135 | 0.138 | 0.141 | 0.144 | 0.147 | 0.15  | 0.153 | 0.155 | 0.158 |
| Uganda                      | 0.085 | 0.085 | 0.084 | 0.083 | 0.083 | 0.082 | 0.082 | 0.082 | 0.083 | 0.084 | 0.084 | 0.085 | 0.087 | 0.089 | 0.091 | 0.093 | 0.094 | 0.097 | 0.099 | 0.101 |
| Zambia                      | 0.135 | 0.138 | 0.142 | 0.145 | 0.149 | 0.153 | 0.157 | 0.161 | 0.164 | 0.169 | 0.174 | 0.179 | 0.184 | 0.189 | 0.195 | 0.201 | 0.208 | 0.215 | 0.222 | 0.23  |
| Southern sub-Saharan Africa | 0.277 | 0.282 | 0.287 | 0.293 | 0.298 | 0.304 | 0.31  | 0.316 | 0.321 | 0.327 | 0.332 | 0.338 | 0.344 | 0.349 | 0.355 | 0.36  | 0.365 | 0.372 | 0.378 | 0.384 |
| Botswana                    | 0.166 | 0.17  | 0.174 | 0.178 | 0.182 | 0.187 | 0.191 | 0.196 | 0.2   | 0.205 | 0.209 | 0.213 | 0.217 | 0.221 | 0.225 | 0.228 | 0.232 | 0.237 | 0.242 | 0.247 |
| Lesotho                     | 0.126 | 0.131 | 0.135 | 0.139 | 0.143 | 0.147 | 0.152 | 0.156 | 0.16  | 0.165 | 0.17  | 0.174 | 0.179 | 0.185 | 0.192 | 0.197 | 0.202 | 0.208 | 0.212 | 0.217 |
| Namibia                     | 0.215 | 0.219 | 0.224 | 0.228 | 0.233 | 0.238 | 0.244 | 0.249 | 0.254 | 0.26  | 0.266 | 0.271 | 0.277 | 0.283 | 0.29  | 0.297 | 0.303 | 0.308 | 0.313 | 0.318 |
| South Africa                | 0.31  | 0.316 | 0.321 | 0.326 | 0.332 | 0.339 | 0.345 | 0.351 | 0.356 | 0.362 | 0.368 | 0.374 | 0.38  | 0.385 | 0.391 | 0.396 | 0.402 | 0.409 | 0.416 | 0.422 |
| Swaziland                   | 0.166 | 0.171 | 0.175 | 0.179 | 0.184 | 0.188 | 0.193 | 0.198 | 0.203 | 0.208 | 0.215 | 0.222 | 0.231 | 0.239 | 0.248 | 0.257 | 0.264 | 0.269 | 0.274 | 0.278 |
| Zimbabwe                    | 0.152 | 0.157 | 0.161 | 0.166 | 0.17  | 0.175 | 0.18  | 0.185 | 0.19  | 0.195 | 0.201 | 0.206 | 0.211 | 0.216 | 0.22  | 0.225 | 0.229 | 0.233 | 0.237 | 0.241 |
| Western sub-Saharan Africa  | 0.131 | 0.134 | 0.137 | 0.14  | 0.144 | 0.147 | 0.15  | 0.153 | 0.157 | 0.161 | 0.165 | 0.169 | 0.173 | 0.177 | 0.182 | 0.186 | 0.189 | 0.193 | 0.196 | 0.201 |
| Benin                       | 0.098 | 0.1   | 0.102 | 0.104 | 0.106 | 0.109 | 0.111 | 0.113 | 0.116 | 0.119 | 0.122 | 0.124 | 0.127 | 0.129 | 0.131 | 0.134 | 0.137 | 0.14  | 0.142 | 0.145 |
| Burkina Faso                | 0.056 | 0.058 | 0.06  | 0.062 | 0.064 | 0.066 | 0.068 | 0.071 | 0.073 | 0.076 | 0.078 | 0.08  | 0.083 | 0.085 | 0.087 | 0.088 | 0.089 | 0.09  | 0.092 | 0.094 |
| Cameroon                    | 0.128 | 0.132 | 0.136 | 0.14  | 0.145 | 0.149 | 0.154 | 0.159 | 0.164 | 0.17  | 0.175 | 0.18  | 0.185 | 0.19  | 0.194 | 0.199 | 0.203 | 0.206 | 0.209 | 0.212 |
| Cape Verde                  | 0.123 | 0.124 | 0.125 | 0.125 | 0.126 | 0.127 | 0.128 | 0.128 | 0.13  | 0.133 | 0.136 | 0.14  | 0.144 | 0.147 | 0.152 | 0.157 | 0.163 | 0.17  | 0.177 | 0.185 |
| Chad                        | 0.064 | 0.065 | 0.067 | 0.068 | 0.07  | 0.071 | 0.073 | 0.075 | 0.076 | 0.078 | 0.08  | 0.081 | 0.083 | 0.085 | 0.086 | 0.088 | 0.089 | 0.091 | 0.092 | 0.093 |
| Cote d'Ivoire               | 0.113 | 0.116 | 0.118 | 0.121 | 0.124 | 0.127 | 0.13  | 0.134 | 0.137 | 0.141 | 0.145 | 0.149 | 0.153 | 0.158 | 0.162 | 0.166 | 0.171 | 0.175 | 0.18  | 0.184 |
| The Gambia                  | 0.099 | 0.101 | 0.104 | 0.106 | 0.109 | 0.111 | 0.114 | 0.117 | 0.119 | 0.123 | 0.126 | 0.129 | 0.132 | 0.134 | 0.137 | 0.139 | 0.142 | 0.145 | 0.148 | 0.151 |
| Ghana                       | 0.225 | 0.229 | 0.231 | 0.234 | 0.237 | 0.239 | 0.239 | 0.241 | 0.243 | 0.246 | 0.249 | 0.252 | 0.255 | 0.26  | 0.264 | 0.268 | 0.271 | 0.272 | 0.274 | 0.277 |
| Guinea                      | 0.066 | 0.068 | 0.069 | 0.07  | 0.073 | 0.075 | 0.078 | 0.081 | 0.084 | 0.087 | 0.091 | 0.094 | 0.098 | 0.101 | 0.104 | 0.107 | 0.11  | 0.113 | 0.116 | 0.118 |
| Guinea-Bissau               | 0.059 | 0.061 | 0.062 | 0.064 | 0.067 | 0.071 | 0.074 | 0.079 | 0.083 | 0.087 | 0.092 | 0.098 | 0.104 | 0.109 | 0.115 | 0.12  | 0.124 | 0.127 | 0.131 | 0.134 |
| Liberia                     | 0.103 | 0.106 | 0.108 | 0.111 | 0.114 | 0.116 | 0.119 | 0.122 | 0.126 | 0.129 | 0.132 | 0.135 | 0.139 | 0.141 | 0.144 | 0.145 | 0.148 | 0.15  | 0.152 | 0.155 |
| Mali                        | 0.059 | 0.06  | 0.061 | 0.063 | 0.064 | 0.065 | 0.067 | 0.068 | 0.07  | 0.072 | 0.073 | 0.075 | 0.077 | 0.078 | 0.08  | 0.081 | 0.082 | 0.084 | 0.085 | 0.087 |
| Mauritania                  | 0.124 | 0.128 | 0.131 | 0.135 | 0.138 | 0.142 | 0.146 | 0.15  | 0.154 | 0.159 | 0.164 | 0.168 | 0.172 | 0.175 | 0.18  | 0.185 | 0.189 | 0.193 | 0.196 | 0.2   |
| Niger                       | 0.056 | 0.057 | 0.058 | 0.059 | 0.06  | 0.061 | 0.062 | 0.063 | 0.065 | 0.066 | 0.067 | 0.068 | 0.07  | 0.071 | 0.071 | 0.072 | 0.073 | 0.074 | 0.075 | 0.076 |
| Nigeria                     | 0.144 | 0.147 | 0.151 | 0.154 | 0.158 | 0.162 | 0.166 | 0.17  | 0.174 | 0.179 | 0.184 | 0.189 | 0.194 | 0.199 | 0.205 | 0.21  | 0.215 | 0.22  | 0.225 | 0.231 |
| Sao Tome and Principe       | 0.146 | 0.15  | 0.152 | 0.153 | 0.153 | 0.154 | 0.154 | 0.154 | 0.155 | 0.157 | 0.158 | 0.16  | 0.162 | 0.164 | 0.165 | 0.167 | 0.169 | 0.171 | 0.174 | 0.179 |
| Senegal                     | 0.108 | 0.111 | 0.114 | 0.117 | 0.12  | 0.124 | 0.128 | 0.132 | 0.135 | 0.137 | 0.14  | 0.144 | 0.146 | 0.146 | 0.146 | 0.147 | 0.149 | 0.152 | 0.154 | 0.155 |
| Sierra Leone                | 0.093 | 0.096 | 0.098 | 0.1   | 0.102 | 0.105 | 0.107 | 0.11  | 0.112 | 0.115 | 0.118 | 0.121 | 0.124 | 0.127 | 0.13  | 0.133 | 0.136 | 0.139 | 0.142 | 0.145 |
| Togo                        | 0.103 | 0.105 | 0.108 | 0.11  | 0.112 | 0.115 | 0.117 | 0.12  | 0.122 | 0.125 | 0.128 | 0.131 | 0.134 | 0.137 | 0.14  | 0.143 | 0.147 | 0.151 | 0.155 | 0.159 |

**Appendix Table 9. Socio-Demographic Index values for all estimated GBD 2017 locations, 1970–1989**

| Location                                         | 1970  | 1971  | 1972  | 1973  | 1974  | 1975  | 1976  | 1977  | 1978  | 1979  | 1980  | 1981  | 1982  | 1983  | 1984  | 1985  | 1986  | 1987  | 1988  | 1989  |
|--------------------------------------------------|-------|-------|-------|-------|-------|-------|-------|-------|-------|-------|-------|-------|-------|-------|-------|-------|-------|-------|-------|-------|
| Global                                           | 0.423 | 0.43  | 0.436 | 0.443 | 0.45  | 0.457 | 0.462 | 0.467 | 0.472 | 0.477 | 0.482 | 0.486 | 0.488 | 0.491 | 0.494 | 0.498 | 0.501 | 0.507 | 0.513 | 0.518 |
| Central Europe, Eastern Europe, and Central Asia | 0.597 | 0.601 | 0.605 | 0.608 | 0.61  | 0.613 | 0.617 | 0.621 | 0.623 | 0.626 | 0.629 | 0.632 | 0.632 | 0.633 | 0.635 | 0.637 | 0.64  | 0.643 | 0.647 | 0.651 |
| Central Asia                                     | 0.486 | 0.49  | 0.494 | 0.499 | 0.503 | 0.508 | 0.514 | 0.519 | 0.525 | 0.529 | 0.532 | 0.536 | 0.538 | 0.541 | 0.543 | 0.545 | 0.548 | 0.552 | 0.556 | 0.56  |
| Armenia                                          | 0.501 | 0.507 | 0.512 | 0.518 | 0.524 | 0.529 | 0.534 | 0.538 | 0.541 | 0.544 | 0.546 | 0.546 | 0.546 | 0.546 | 0.546 | 0.545 | 0.546 | 0.547 | 0.549 | 0.552 |
| Azerbaijan                                       | 0.511 | 0.519 | 0.526 | 0.534 | 0.542 | 0.55  | 0.559 | 0.567 | 0.574 | 0.579 | 0.584 | 0.589 | 0.593 | 0.596 | 0.599 | 0.601 | 0.604 | 0.606 | 0.608 | 0.61  |
| Georgia                                          | 0.578 | 0.584 | 0.589 | 0.595 | 0.6   | 0.603 | 0.607 | 0.612 | 0.616 | 0.617 | 0.618 | 0.62  | 0.623 | 0.627 | 0.629 | 0.63  | 0.633 | 0.639 | 0.645 | 0.65  |
| Kazakhstan                                       | 0.527 | 0.533 | 0.539 | 0.546 | 0.553 | 0.559 | 0.565 | 0.57  | 0.576 | 0.58  | 0.584 | 0.588 | 0.591 | 0.593 | 0.594 | 0.595 | 0.598 | 0.602 | 0.606 | 0.61  |
| Kyrgyzstan                                       | 0.485 | 0.487 | 0.492 | 0.499 | 0.504 | 0.509 | 0.515 | 0.52  | 0.525 | 0.529 | 0.531 | 0.532 | 0.533 | 0.536 | 0.54  | 0.543 | 0.547 | 0.552 | 0.557 | 0.56  |
| Mongolia                                         | 0.417 | 0.423 | 0.429 | 0.435 | 0.44  | 0.446 | 0.451 | 0.456 | 0.461 | 0.466 | 0.472 | 0.479 | 0.486 | 0.492 | 0.498 | 0.503 | 0.509 | 0.516 | 0.523 | 0.529 |
| Tajikistan                                       | 0.327 | 0.328 | 0.326 | 0.322 | 0.324 | 0.34  | 0.36  | 0.375 | 0.384 | 0.393 | 0.403 | 0.412 | 0.419 | 0.425 | 0.43  | 0.436 | 0.444 | 0.455 | 0.464 | 0.469 |
| Turkmenistan                                     | 0.497 | 0.502 | 0.507 | 0.513 | 0.518 | 0.523 | 0.528 | 0.533 | 0.537 | 0.542 | 0.546 | 0.55  | 0.554 | 0.558 | 0.562 | 0.565 | 0.569 | 0.574 | 0.579 | 0.584 |
| Uzbekistan                                       | 0.388 | 0.393 | 0.396 | 0.401 | 0.405 | 0.41  | 0.416 | 0.422 | 0.428 | 0.433 | 0.437 | 0.442 | 0.446 | 0.45  | 0.454 | 0.458 | 0.463 | 0.467 | 0.472 | 0.477 |
| Central Europe                                   | 0.59  | 0.595 | 0.598 | 0.598 | 0.598 | 0.601 | 0.605 | 0.609 | 0.613 | 0.617 | 0.622 | 0.626 | 0.629 | 0.631 | 0.633 | 0.637 | 0.641 | 0.646 | 0.651 | 0.658 |
| Albania                                          | 0.433 | 0.441 | 0.451 | 0.46  | 0.469 | 0.478 | 0.486 | 0.495 | 0.503 | 0.511 | 0.519 | 0.526 | 0.532 | 0.535 | 0.537 | 0.541 | 0.546 | 0.549 | 0.549 | 0.549 |
| Bosnia and Herzegovina                           | 0.386 | 0.393 | 0.4   | 0.406 | 0.413 | 0.419 | 0.425 | 0.432 | 0.438 | 0.445 | 0.452 | 0.458 | 0.465 | 0.47  | 0.475 | 0.48  | 0.484 | 0.489 | 0.492 | 0.495 |
| Bulgaria                                         | 0.565 | 0.571 | 0.572 | 0.567 | 0.568 | 0.572 | 0.575 | 0.579 | 0.583 | 0.589 | 0.596 | 0.601 | 0.605 | 0.61  | 0.617 | 0.621 | 0.624 | 0.628 | 0.635 | 0.646 |
| Croatia                                          | 0.628 | 0.633 | 0.637 | 0.64  | 0.644 | 0.647 | 0.651 | 0.656 | 0.661 | 0.667 | 0.672 | 0.678 | 0.683 | 0.688 | 0.692 | 0.697 | 0.702 | 0.707 | 0.713 | 0.719 |
| Czech Republic                                   | 0.664 | 0.664 | 0.657 | 0.648 | 0.644 | 0.646 | 0.65  | 0.652 | 0.656 | 0.666 | 0.677 | 0.681 | 0.683 | 0.686 | 0.688 | 0.692 | 0.697 | 0.701 | 0.704 | 0.708 |
| Hungary                                          | 0.586 | 0.591 | 0.593 | 0.587 | 0.58  | 0.583 | 0.59  | 0.598 | 0.605 | 0.615 | 0.624 | 0.633 | 0.642 | 0.648 | 0.65  | 0.653 | 0.658 | 0.664 | 0.67  | 0.675 |
| Macedonia                                        | 0.552 | 0.557 | 0.561 | 0.564 | 0.567 | 0.57  | 0.574 | 0.576 | 0.579 | 0.583 | 0.588 | 0.594 | 0.598 | 0.601 | 0.605 | 0.61  | 0.614 | 0.617 | 0.62  | 0.623 |
| Montenegro                                       | 0.647 | 0.652 | 0.656 | 0.661 | 0.665 | 0.669 | 0.674 | 0.677 | 0.681 | 0.685 | 0.687 | 0.689 | 0.691 | 0.692 | 0.694 | 0.696 | 0.698 | 0.699 | 0.701 | 0.704 |
| Poland                                           | 0.612 | 0.615 | 0.619 | 0.621 | 0.623 | 0.623 | 0.626 | 0.631 | 0.633 | 0.633 | 0.636 | 0.635 | 0.63  | 0.63  | 0.633 | 0.639 | 0.645 | 0.649 | 0.654 | 0.659 |
| Romania                                          | 0.532 | 0.542 | 0.55  | 0.549 | 0.548 | 0.555 | 0.559 | 0.564 | 0.569 | 0.573 | 0.58  | 0.589 | 0.601 | 0.604 | 0.604 | 0.604 | 0.606 | 0.611 | 0.62  | 0.626 |
| Serbia                                           | 0.571 | 0.574 | 0.577 | 0.58  | 0.582 | 0.584 | 0.587 | 0.591 | 0.593 | 0.595 | 0.601 | 0.604 | 0.604 | 0.605 | 0.608 | 0.612 | 0.615 | 0.617 | 0.622 | 0.627 |
| Slovakia                                         | 0.628 | 0.631 | 0.63  | 0.628 | 0.63  | 0.633 | 0.636 | 0.638 | 0.64  | 0.645 | 0.652 | 0.655 | 0.657 | 0.658 | 0.659 | 0.663 | 0.669 | 0.674 | 0.679 | 0.681 |
| Slovenia                                         | 0.651 | 0.654 | 0.657 | 0.661 | 0.664 | 0.665 | 0.668 | 0.671 | 0.675 | 0.68  | 0.685 | 0.691 | 0.697 | 0.704 | 0.71  | 0.714 | 0.718 | 0.724 | 0.73  | 0.736 |
| Eastern Europe                                   | 0.619 | 0.622 | 0.628 | 0.633 | 0.637 | 0.641 | 0.644 | 0.648 | 0.65  | 0.653 | 0.655 | 0.658 | 0.657 | 0.658 | 0.66  | 0.662 | 0.664 | 0.666 | 0.671 | 0.674 |
| Belarus                                          | 0.559 | 0.561 | 0.565 | 0.569 | 0.573 | 0.576 | 0.58  | 0.583 | 0.585 | 0.588 | 0.59  | 0.592 | 0.593 | 0.595 | 0.597 | 0.601 | 0.605 | 0.609 | 0.615 | 0.62  |
| Estonia                                          | 0.668 | 0.671 | 0.676 | 0.682 | 0.684 | 0.684 | 0.684 | 0.686 | 0.69  | 0.692 | 0.69  | 0.689 | 0.69  | 0.694 | 0.696 | 0.695 | 0.692 | 0.692 | 0.699 | 0.705 |
| Latvia                                           | 0.651 | 0.655 | 0.659 | 0.664 | 0.668 | 0.669 | 0.672 | 0.675 | 0.678 | 0.68  | 0.681 | 0.681 | 0.68  | 0.681 | 0.683 | 0.683 | 0.683 | 0.685 | 0.689 | 0.693 |
| Lithuania                                        | 0.66  | 0.664 | 0.67  | 0.677 | 0.681 | 0.684 | 0.686 | 0.689 | 0.692 | 0.695 | 0.701 | 0.705 | 0.707 | 0.708 | 0.709 | 0.711 | 0.712 | 0.712 | 0.71  | 0.709 |
| Moldova                                          | 0.524 | 0.528 | 0.531 | 0.536 | 0.54  | 0.545 | 0.549 | 0.552 | 0.554 | 0.556 | 0.558 | 0.558 | 0.558 | 0.559 | 0.56  | 0.562 | 0.564 | 0.566 | 0.569 | 0.571 |
| Russian Federation                               | 0.628 | 0.632 | 0.639 | 0.644 | 0.648 | 0.651 | 0.655 | 0.658 | 0.66  | 0.663 | 0.666 | 0.668 | 0.666 | 0.666 | 0.668 | 0.669 | 0.671 | 0.673 | 0.677 | 0.679 |
| Ukraine                                          | 0.593 | 0.596 | 0.599 | 0.604 | 0.609 | 0.613 | 0.617 | 0.62  | 0.624 | 0.627 | 0.63  | 0.632 | 0.633 | 0.636 | 0.639 | 0.643 | 0.646 | 0.65  | 0.655 | 0.659 |
| High-income                                      | 0.666 | 0.673 | 0.681 | 0.688 | 0.694 | 0.7   | 0.705 | 0.71  | 0.715 | 0.718 | 0.723 | 0.728 | 0.734 | 0.74  | 0.744 | 0.749 | 0.754 | 0.758 | 0.762 | 0.765 |
| Australasia                                      | 0.66  | 0.664 | 0.677 | 0.687 | 0.697 | 0.707 | 0.716 | 0.724 | 0.731 | 0.736 | 0.739 | 0.743 | 0.747 | 0.752 | 0.758 | 0.762 | 0.767 | 0.772 | 0.776 | 0.779 |
| Australia                                        | 0.664 | 0.667 | 0.68  | 0.69  | 0.699 | 0.709 | 0.718 | 0.725 | 0.732 | 0.737 | 0.741 | 0.744 | 0.748 | 0.754 | 0.759 | 0.764 | 0.77  | 0.775 | 0.779 | 0.783 |
| New Zealand                                      | 0.645 | 0.651 | 0.662 | 0.675 | 0.687 | 0.697 | 0.706 | 0.716 | 0.723 | 0.728 | 0.733 | 0.738 | 0.743 | 0.747 | 0.751 | 0.754 | 0.756 | 0.757 | 0.759 | 0.762 |
| High-income Asia-Pacific                         | 0.663 | 0.667 | 0.672 | 0.68  | 0.688 | 0.695 | 0.702 | 0.708 | 0.713 | 0.718 | 0.722 | 0.726 | 0.732 | 0.738 | 0.745 | 0.752 | 0.758 | 0.764 | 0.771 | 0.777 |
| Brunei                                           | 0.57  | 0.584 | 0.601 | 0.619 | 0.639 | 0.654 | 0.657 | 0.654 | 0.653 | 0.656 | 0.66  | 0.668 | 0.677 | 0.685 | 0.691 | 0.697 | 0.704 | 0.712 | 0.718 | 0.724 |
| Japan                                            | 0.696 | 0.697 | 0.701 | 0.707 | 0.714 | 0.722 | 0.73  | 0.737 | 0.743 | 0.749 | 0.754 | 0.759 | 0.762 | 0.766 | 0.771 | 0.777 | 0.781 | 0.787 | 0.792 | 0.798 |
| Aichi                                            | 0.698 | 0.698 | 0.701 | 0.706 | 0.715 | 0.724 | 0.733 | 0.74  | 0.747 | 0.754 | 0.76  | 0.764 | 0.768 | 0.771 | 0.777 | 0.782 | 0.787 | 0.793 | 0.8   | 0.806 |
| Akita                                            | 0.658 | 0.658 | 0.66  | 0.665 | 0.671 | 0.679 | 0.686 | 0.693 | 0.7   | 0.707 | 0.714 | 0.719 | 0.723 | 0.728 | 0.734 | 0.74  | 0.745 | 0.75  | 0.756 | 0.762 |
| Aomori                                           | 0.65  | 0.65  | 0.652 | 0.657 | 0.664 | 0.673 | 0.68  | 0.688 | 0.695 | 0.702 | 0.708 | 0.713 | 0.716 | 0.721 | 0.727 | 0.733 | 0.738 | 0.744 | 0.75  | 0.756 |
| Chiba                                            | 0.691 | 0.692 | 0.696 | 0.701 | 0.709 | 0.718 | 0.726 | 0.734 | 0.741 | 0.747 | 0.753 | 0.757 | 0.761 | 0.765 | 0.77  | 0.775 | 0.78  | 0.786 | 0.792 | 0.798 |
| Ehime                                            | 0.667 | 0.668 | 0.671 | 0.677 | 0.685 | 0.693 | 0.701 | 0.708 | 0.714 | 0.721 | 0.727 | 0.731 | 0.735 | 0.739 | 0.744 | 0.749 | 0.754 | 0.759 | 0.765 | 0.771 |
| Fukui                                            | 0.667 | 0.667 | 0.669 | 0.674 | 0.682 | 0.691 | 0.698 | 0.706 | 0.713 | 0.72  | 0.727 | 0.732 | 0.737 | 0.741 | 0.748 | 0.754 | 0.759 | 0.765 | 0.772 | 0.779 |
| Fukuoka                                          | 0.692 | 0.695 | 0.699 | 0.705 | 0.713 | 0.72  | 0.727 | 0.734 | 0.739 | 0.745 | 0.75  | 0.754 | 0.757 | 0.761 | 0.766 | 0.771 | 0.775 | 0.781 | 0.787 | 0.792 |
| Fukushima                                        | 0.663 | 0.663 | 0.665 | 0.671 | 0.678 | 0.686 | 0.694 | 0.701 | 0.707 | 0.713 | 0.719 | 0.723 | 0.727 | 0.73  | 0.736 | 0.741 | 0.746 | 0.752 | 0.759 | 0.765 |
| Gifu                                             | 0.672 | 0.673 | 0.676 | 0.681 | 0.689 | 0.697 | 0.705 | 0.712 | 0.719 | 0.725 | 0.732 | 0.737 | 0.741 | 0.745 | 0.751 | 0.757 | 0.762 | 0.768 | 0.774 | 0.78  |
| Gunma                                            | 0.683 | 0.685 | 0.689 | 0.695 | 0.702 | 0.71  | 0.717 | 0.724 | 0.729 | 0.735 | 0.74  | 0.745 | 0.748 | 0.751 | 0.756 | 0.761 | 0.766 | 0.771 | 0.776 | 0.782 |
| Hiroshima                                        | 0.688 | 0.688 | 0.691 | 0.697 | 0.705 | 0.715 | 0.723 | 0.731 | 0.738 | 0.744 | 0.75  | 0.755 | 0.758 | 0.762 | 0.768 | 0.773 | 0.778 | 0.783 | 0.789 | 0.795 |
| Hokkaidō                                         | 0.676 | 0.677 | 0.68  | 0.686 | 0.693 | 0.702 | 0.71  | 0.718 | 0.725 | 0.731 | 0.737 | 0.742 | 0.745 | 0.749 | 0.754 | 0.758 | 0.763 | 0.768 | 0.773 | 0.779 |
| Hyōgo                                            | 0.689 | 0.691 | 0.694 | 0.7   | 0.708 | 0.717 | 0.725 | 0.732 | 0.739 | 0.745 | 0.75  | 0.755 | 0.758 | 0.762 | 0.767 | 0.772 | 0.776 | 0.782 | 0.787 | 0.793 |
| Ibaraki                                          | 0.679 | 0.68  | 0.683 | 0.689 | 0.697 | 0.706 | 0.713 | 0.72  | 0.726 | 0.732 | 0.738 | 0.742 | 0.745 | 0.749 | 0.755 | 0.76  | 0.765 | 0.771 | 0.777 | 0.783 |
| Ishikawa                                         | 0.669 | 0.668 | 0.67  | 0.675 | 0.682 | 0.691 | 0.7   | 0.707 | 0.715 | 0.722 | 0.729 | 0.734 | 0.739 | 0.744 | 0.751 | 0.757 | 0.763 | 0.77  | 0.777 | 0.783 |
| Iwate                                            | 0.65  | 0.65  | 0.652 | 0.657 | 0.665 | 0.674 | 0.681 | 0.688 | 0.695 | 0.701 | 0.707 | 0.712 | 0.716 | 0.721 | 0.727 | 0.733 | 0.738 | 0.744 | 0.749 | 0.755 |
| Kagawa                                           | 0.675 | 0.676 | 0.678 | 0.684 | 0.692 | 0.701 | 0     |       |       |       |       |       |       |       |       |       |       |       |       |       |

**Appendix Table 9. Socio-Demographic Index values for all estimated GBD 2017 locations, 1970–1989**

| Location                  | 1970  | 1971  | 1972  | 1973  | 1974  | 1975  | 1976  | 1977    | 1978  | 1979  | 1980  | 1981  | 1982  | 1983  | 1984  | 1985  | 1986  | 1987  | 1988  | 1989  |
|---------------------------|-------|-------|-------|-------|-------|-------|-------|---------|-------|-------|-------|-------|-------|-------|-------|-------|-------|-------|-------|-------|
| Öita                      | 0.679 | 0.681 | 0.684 | 0.689 | 0.696 | 0.704 | 0.711 | 0.717   | 0.723 | 0.729 | 0.735 | 0.74  | 0.744 | 0.748 | 0.754 | 0.759 | 0.764 | 0.769 | 0.774 | 0.78  |
| Okayama                   | 0.677 | 0.677 | 0.68  | 0.685 | 0.694 | 0.703 | 0.711 | 0.719   | 0.726 | 0.732 | 0.737 | 0.742 | 0.745 | 0.749 | 0.755 | 0.761 | 0.766 | 0.772 | 0.778 | 0.784 |
| Okinawa                   | 0.643 | 0.643 | 0.644 | 0.649 | 0.657 | 0.665 | 0.673 | 0.68    | 0.686 | 0.692 | 0.698 | 0.703 | 0.707 | 0.711 | 0.717 | 0.723 | 0.729 | 0.735 | 0.742 | 0.748 |
| Osaka                     | 0.709 | 0.711 | 0.714 | 0.72  | 0.728 | 0.737 | 0.745 | 0.752   | 0.759 | 0.765 | 0.77  | 0.774 | 0.777 | 0.781 | 0.785 | 0.789 | 0.794 | 0.799 | 0.804 | 0.81  |
| Saga                      | 0.668 | 0.67  | 0.674 | 0.68  | 0.687 | 0.695 | 0.701 | 0.707   | 0.713 | 0.719 | 0.724 | 0.729 | 0.732 | 0.736 | 0.742 | 0.747 | 0.751 | 0.757 | 0.762 | 0.768 |
| Saitama                   | 0.683 | 0.685 | 0.688 | 0.694 | 0.702 | 0.711 | 0.719 | 0.726   | 0.733 | 0.74  | 0.746 | 0.75  | 0.754 | 0.757 | 0.763 | 0.767 | 0.772 | 0.777 | 0.783 | 0.788 |
| Shiga                     | 0.694 | 0.695 | 0.698 | 0.704 | 0.712 | 0.72  | 0.727 | 0.734   | 0.74  | 0.747 | 0.753 | 0.758 | 0.761 | 0.765 | 0.77  | 0.775 | 0.78  | 0.786 | 0.792 | 0.798 |
| Shimane                   | 0.658 | 0.659 | 0.662 | 0.668 | 0.676 | 0.684 | 0.69  | 0.697   | 0.702 | 0.708 | 0.713 | 0.718 | 0.722 | 0.725 | 0.731 | 0.736 | 0.74  | 0.746 | 0.751 | 0.757 |
| Shizuoka                  | 0.687 | 0.687 | 0.69  | 0.696 | 0.704 | 0.713 | 0.721 | 0.729   | 0.735 | 0.742 | 0.747 | 0.752 | 0.755 | 0.759 | 0.764 | 0.77  | 0.774 | 0.78  | 0.786 | 0.792 |
| Tochigi                   | 0.682 | 0.683 | 0.686 | 0.692 | 0.699 | 0.707 | 0.714 | 0.721   | 0.727 | 0.733 | 0.738 | 0.743 | 0.746 | 0.749 | 0.754 | 0.759 | 0.764 | 0.77  | 0.776 | 0.782 |
| Tokushima                 | 0.668 | 0.669 | 0.672 | 0.678 | 0.685 | 0.694 | 0.701 | 0.707   | 0.713 | 0.719 | 0.725 | 0.729 | 0.732 | 0.736 | 0.742 | 0.748 | 0.753 | 0.758 | 0.765 | 0.771 |
| Tōkyō                     | 0.774 | 0.777 | 0.782 | 0.788 | 0.795 | 0.803 | 0.809 | 0.815   | 0.821 | 0.826 | 0.83  | 0.834 | 0.837 | 0.84  | 0.844 | 0.848 | 0.85  | 0.856 | 0.861 | 0.866 |
| Tottori                   | 0.664 | 0.665 | 0.668 | 0.674 | 0.682 | 0.69  | 0.697 | 0.704   | 0.71  | 0.715 | 0.721 | 0.726 | 0.729 | 0.733 | 0.739 | 0.744 | 0.749 | 0.754 | 0.76  | 0.766 |
| Toyama                    | 0.674 | 0.673 | 0.675 | 0.68  | 0.687 | 0.696 | 0.704 | 0.712   | 0.719 | 0.726 | 0.733 | 0.738 | 0.743 | 0.747 | 0.753 | 0.759 | 0.765 | 0.771 | 0.778 | 0.785 |
| Wakayama                  | 0.665 | 0.667 | 0.67  | 0.676 | 0.685 | 0.694 | 0.702 | 0.709   | 0.714 | 0.718 | 0.721 | 0.723 | 0.726 | 0.73  | 0.738 | 0.744 | 0.75  | 0.757 | 0.763 | 0.77  |
| Yamagata                  | 0.66  | 0.661 | 0.663 | 0.669 | 0.675 | 0.683 | 0.689 | 0.696   | 0.702 | 0.709 | 0.715 | 0.72  | 0.725 | 0.729 | 0.734 | 0.74  | 0.744 | 0.75  | 0.756 | 0.761 |
| Yamaguchi                 | 0.684 | 0.685 | 0.688 | 0.694 | 0.702 | 0.71  | 0.717 | 0.724   | 0.73  | 0.736 | 0.742 | 0.746 | 0.75  | 0.753 | 0.759 | 0.764 | 0.768 | 0.774 | 0.78  | 0.786 |
| Yamanashi                 | 0.691 | 0.694 | 0.699 | 0.705 | 0.712 | 0.72  | 0.726 | 0.732   | 0.737 | 0.743 | 0.748 | 0.753 | 0.756 | 0.76  | 0.764 | 0.769 | 0.772 | 0.777 | 0.782 | 0.787 |
| South Korea               | 0.494 | 0.508 | 0.523 | 0.542 | 0.557 | 0.568 | 0.578 | 0.587   | 0.595 | 0.601 | 0.605 | 0.611 | 0.623 | 0.636 | 0.647 | 0.659 | 0.671 | 0.682 | 0.692 | 0.702 |
| Singapore                 | 0.568 | 0.576 | 0.586 | 0.598 | 0.612 | 0.621 | 0.63  | 0.641   | 0.647 | 0.654 | 0.662 | 0.669 | 0.678 | 0.687 | 0.694 | 0.702 | 0.71  | 0.715 | 0.722 | 0.729 |
| High-income North America | 0.702 | 0.719 | 0.733 | 0.74  | 0.745 | 0.751 | 0.755 | 0.758   | 0.762 | 0.762 | 0.765 | 0.769 | 0.773 | 0.777 | 0.779 | 0.782 | 0.786 | 0.787 | 0.786 | 0.784 |
| Canada                    | 0.702 | 0.712 | 0.721 | 0.728 | 0.732 | 0.736 | 0.742 | 0.749   | 0.755 | 0.759 | 0.764 | 0.769 | 0.772 | 0.777 | 0.782 | 0.787 | 0.792 | 0.796 | 0.798 | 0.8   |
| Greenland                 | 0.57  | 0.592 | 0.609 | 0.622 | 0.631 | 0.636 | 0.642 | 0.648   | 0.653 | 0.657 | 0.662 | 0.666 | 0.671 | 0.674 | 0.675 | 0.676 | 0.676 | 0.675 | 0.673 | 0.673 |
| USA                       | 0.702 | 0.719 | 0.734 | 0.741 | 0.746 | 0.752 | 0.756 | 0.759   | 0.762 | 0.762 | 0.765 | 0.769 | 0.772 | 0.777 | 0.779 | 0.781 | 0.785 | 0.786 | 0.784 | 0.782 |
| Alabama                   | 0.643 | 0.659 | 0.675 | 0.684 | 0.69  | 0.699 | 0.705 | 0.71    | 0.716 | 0.718 | 0.723 | 0.729 | 0.733 | 0.739 | 0.742 | 0.745 | 0.749 | 0.75  | 0.748 | 0.745 |
| Alaska                    | 0.687 | 0.706 | 0.722 | 0.728 | 0.734 | 0.745 | 0.752 | 0.757   | 0.761 | 0.758 | 0.76  | 0.762 | 0.764 | 0.768 | 0.767 | 0.768 | 0.772 | 0.771 | 0.767 | 0.759 |
| Arizona                   | 0.679 | 0.694 | 0.708 | 0.715 | 0.723 | 0.734 | 0.741 | 0.746   | 0.75  | 0.748 | 0.75  | 0.751 | 0.752 | 0.755 | 0.754 | 0.755 | 0.759 | 0.759 | 0.757 | 0.753 |
| Arkansas                  | 0.631 | 0.646 | 0.659 | 0.667 | 0.673 | 0.683 | 0.689 | 0.695   | 0.701 | 0.702 | 0.706 | 0.711 | 0.716 | 0.721 | 0.723 | 0.726 | 0.729 | 0.729 | 0.727 | 0.723 |
| California                | 0.733 | 0.752 | 0.765 | 0.769 | 0.77  | 0.773 | 0.775 | 0.777   | 0.779 | 0.777 | 0.779 | 0.781 | 0.782 | 0.786 | 0.786 | 0.786 | 0.788 | 0.786 | 0.782 | 0.775 |
| Colorado                  | 0.721 | 0.738 | 0.752 | 0.761 | 0.768 | 0.775 | 0.78  | 0.783   | 0.785 | 0.784 | 0.786 | 0.789 | 0.791 | 0.794 | 0.795 | 0.797 | 0.8   | 0.801 | 0.801 | 0.799 |
| Connecticut               | 0.751 | 0.768 | 0.782 | 0.789 | 0.794 | 0.8   | 0.803 | 0.805   | 0.808 | 0.809 | 0.812 | 0.816 | 0.819 | 0.824 | 0.827 | 0.83  | 0.835 | 0.837 | 0.839 | 0.84  |
| Delaware                  | 0.722 | 0.738 | 0.752 | 0.76  | 0.765 | 0.772 | 0.775 | 0.778   | 0.78  | 0.779 | 0.782 | 0.785 | 0.787 | 0.791 | 0.793 | 0.795 | 0.799 | 0.8   | 0.8   | 0.8   |
| Washington, DC            | 0.736 | 0.749 | 0.761 | 0.768 | 0.774 | 0.783 | 0.788 | 0.792   | 0.796 | 0.795 | 0.797 | 0.799 | 0.8   | 0.802 | 0.801 | 0.802 | 0.804 | 0.803 | 0.801 | 0.797 |
| Florida                   | 0.684 | 0.701 | 0.717 | 0.727 | 0.736 | 0.748 | 0.755 | 0.76    | 0.764 | 0.763 | 0.765 | 0.768 | 0.77  | 0.773 | 0.773 | 0.775 | 0.778 | 0.778 | 0.777 | 0.774 |
| Georgia                   | 0.651 | 0.668 | 0.685 | 0.696 | 0.704 | 0.714 | 0.72  | 0.726   | 0.73  | 0.731 | 0.734 | 0.738 | 0.742 | 0.747 | 0.75  | 0.753 | 0.757 | 0.758 | 0.757 | 0.755 |
| Hawaii                    | 0.717 | 0.731 | 0.744 | 0.75  | 0.756 | 0.764 | 0.768 | 0.772   | 0.775 | 0.774 | 0.776 | 0.778 | 0.779 | 0.782 | 0.782 | 0.783 | 0.787 | 0.787 | 0.786 | 0.782 |
| Idaho                     | 0.671 | 0.687 | 0.7   | 0.705 | 0.709 | 0.715 | 0.717 | 0.719   | 0.724 | 0.725 | 0.731 | 0.738 | 0.743 | 0.751 | 0.753 | 0.756 | 0.76  | 0.761 | 0.76  | 0.757 |
| Illinois                  | 0.711 | 0.728 | 0.742 | 0.75  | 0.755 | 0.761 | 0.764 | 0.767   | 0.77  | 0.769 | 0.772 | 0.776 | 0.779 | 0.784 | 0.787 | 0.789 | 0.793 | 0.793 | 0.791 | 0.788 |
| Indiana                   | 0.687 | 0.704 | 0.719 | 0.726 | 0.731 | 0.738 | 0.742 | 0.745   | 0.749 | 0.749 | 0.753 | 0.758 | 0.762 | 0.767 | 0.769 | 0.771 | 0.775 | 0.775 | 0.774 | 0.772 |
| Iowa                      | 0.706 | 0.724 | 0.738 | 0.746 | 0.75  | 0.755 | 0.756 | 0.758   | 0.762 | 0.763 | 0.767 | 0.772 | 0.777 | 0.783 | 0.785 | 0.789 | 0.793 | 0.794 | 0.794 | 0.793 |
| Kansas                    | 0.707 | 0.724 | 0.738 | 0.744 | 0.748 | 0.753 | 0.754 | 0.755   | 0.757 | 0.756 | 0.759 | 0.763 | 0.767 | 0.772 | 0.774 | 0.777 | 0.782 | 0.784 | 0.784 | 0.782 |
| Kentucky                  | 0.647 | 0.664 | 0.679 | 0.687 | 0.692 | 0.699 | 0.703 | 0.707   | 0.712 | 0.714 | 0.72  | 0.726 | 0.731 | 0.737 | 0.74  | 0.744 | 0.747 | 0.748 | 0.747 | 0.744 |
| Louisiana                 | 0.642 | 0.662 | 0.678 | 0.687 | 0.692 | 0.698 | 0.702 | 0.705   | 0.708 | 0.708 | 0.713 | 0.719 | 0.724 | 0.73  | 0.733 | 0.736 | 0.741 | 0.741 | 0.74  | 0.736 |
| Maine                     | 0.68  | 0.697 | 0.712 | 0.72  | 0.726 | 0.734 | 0.739 | 0.743   | 0.748 | 0.749 | 0.754 | 0.758 | 0.763 | 0.768 | 0.77  | 0.774 | 0.779 | 0.782 | 0.784 | 0.786 |
| Maryland                  | 0.727 | 0.746 | 0.762 | 0.771 | 0.778 | 0.785 | 0.788 | 0.791   | 0.794 | 0.794 | 0.796 | 0.798 | 0.8   | 0.804 | 0.806 | 0.808 | 0.812 | 0.813 | 0.813 | 0.812 |
| Massachusetts             | 0.75  | 0.766 | 0.779 | 0.787 | 0.792 | 0.798 | 0.801 | 0.804   | 0.808 | 0.809 | 0.812 | 0.815 | 0.818 | 0.823 | 0.826 | 0.83  | 0.834 | 0.838 | 0.84  | 0.841 |
| Michigan                  | 0.701 | 0.719 | 0.735 | 0.743 | 0.749 | 0.756 | 0.76  | 0.763   | 0.766 | 0.766 | 0.77  | 0.773 | 0.777 | 0.782 | 0.784 | 0.787 | 0.791 | 0.792 | 0.79  | 0.788 |
| Minnesota                 | 0.728 | 0.744 | 0.756 | 0.761 | 0.765 | 0.769 | 0.77  | 0.772   | 0.776 | 0.777 | 0.781 | 0.786 | 0.791 | 0.797 | 0.801 | 0.806 | 0.811 | 0.814 | 0.816 | 0.816 |
| Mississippi               | 0.607 | 0.625 | 0.642 | 0.653 | 0.661 | 0.672 | 0.679 | 0.685   | 0.691 | 0.692 | 0.698 | 0.704 | 0.709 | 0.716 | 0.718 | 0.721 | 0.725 | 0.725 | 0.723 | 0.719 |
| Missouri                  | 0.69  | 0.706 | 0.72  | 0.727 | 0.732 | 0.739 | 0.742 | 0.744   | 0.747 | 0.746 | 0.749 | 0.753 | 0.757 | 0.763 | 0.765 | 0.768 | 0.773 | 0.774 | 0.773 | 0.77  |
| Montana                   | 0.693 | 0.708 | 0.721 | 0.728 | 0.733 | 0.742 | 0.745 | 0.749   | 0.754 | 0.755 | 0.759 | 0.763 | 0.767 | 0.772 | 0.773 | 0.775 | 0.778 | 0.779 | 0.778 | 0.775 |
| Nebraska                  | 0.708 | 0.724 | 0.737 | 0.744 | 0.749 | 0.756 | 0.759 | 0.762   | 0.766 | 0.766 | 0.769 | 0.774 | 0.778 | 0.783 | 0.785 | 0.788 | 0.793 | 0.794 | 0.795 | 0.794 |
| Nevada                    | 0.708 | 0.726 | 0.742 | 0.75  | 0.756 | 0.765 | 0.769 | 0.772   | 0.774 | 0.772 | 0.773 | 0.774 | 0.775 | 0.778 | 0.777 | 0.776 | 0.778 | 0.775 | 0.771 | 0.764 |
| New Hampshire             | 0.711 | 0.728 | 0.743 | 0.751 | 0.759 | 0.767 | 0.772 | 0.777   | 0.782 | 0.784 | 0.788 | 0.792 | 0.796 | 0.801 | 0.804 | 0.808 | 0.814 | 0.818 | 0.822 | 0.824 |
| New Jersey                | 0.732 | 0.749 | 0.763 | 0.772 | 0.778 | 0.784 | 0.788 | 0.791   | 0.795 | 0.796 | 0.799 | 0.803 | 0.807 | 0.812 | 0.816 | 0.819 | 0.823 | 0.825 | 0.826 | 0.827 |
| New Mexico                | 0.663 | 0.68  | 0.694 | 0.7   | 0.706 | 0.715 | 0.719 | 0.722   | 0.725 | 0.723 | 0.725 | 0.729 | 0.732 | 0.737 | 0.738 | 0.74  | 0.744 | 0.744 | 0.741 | 0.735 |
| New York                  | 0.735 | 0.753 | 0.767 | 0.773 | 0.776 | 0.781 | 0.784 | 0.787   | 0.792 | 0.793 | 0.796 | 0.8   | 0.802 | 0.806 | 0.808 | 0.811 | 0.814 | 0.815 | 0.816 | 0.815 |
| North Carolina            | 0.662 | 0.678 | 0.693 | 0.703 | 0.711 | 0.72  | 0.727 | 0.733</ |       |       |       |       |       |       |       |       |       |       |       |       |

Appendix Table 9. Socio-Demographic Index values for all estimated GBD 2017 locations, 1970–1989

| Location                | 1970  | 1971  | 1972  | 1973  | 1974  | 1975  | 1976  | 1977  | 1978  | 1979  | 1980  | 1981  | 1982  | 1983  | 1984  | 1985  | 1986  | 1987  | 1988  | 1989  |
|-------------------------|-------|-------|-------|-------|-------|-------|-------|-------|-------|-------|-------|-------|-------|-------|-------|-------|-------|-------|-------|-------|
| Washington              | 0.732 | 0.752 | 0.767 | 0.773 | 0.776 | 0.78  | 0.781 | 0.782 | 0.784 | 0.782 | 0.785 | 0.788 | 0.79  | 0.794 | 0.795 | 0.797 | 0.8   | 0.801 | 0.8   | 0.797 |
| West Virginia           | 0.654 | 0.669 | 0.684 | 0.692 | 0.697 | 0.704 | 0.708 | 0.712 | 0.717 | 0.719 | 0.724 | 0.73  | 0.736 | 0.742 | 0.744 | 0.747 | 0.751 | 0.752 | 0.751 | 0.748 |
| Wisconsin               | 0.715 | 0.732 | 0.745 | 0.752 | 0.755 | 0.761 | 0.764 | 0.767 | 0.77  | 0.77  | 0.773 | 0.777 | 0.781 | 0.785 | 0.788 | 0.791 | 0.796 | 0.799 | 0.8   | 0.8   |
| Wyoming                 | 0.685 | 0.703 | 0.717 | 0.723 | 0.728 | 0.736 | 0.738 | 0.739 | 0.741 | 0.739 | 0.742 | 0.746 | 0.75  | 0.755 | 0.755 | 0.758 | 0.765 | 0.767 | 0.767 | 0.765 |
| Southern Latin America  | 0.522 | 0.527 | 0.529 | 0.531 | 0.534 | 0.537 | 0.54  | 0.542 | 0.545 | 0.549 | 0.554 | 0.56  | 0.566 | 0.572 | 0.576 | 0.577 | 0.579 | 0.583 | 0.586 | 0.591 |
| Argentina               | 0.531 | 0.536 | 0.538 | 0.539 | 0.538 | 0.537 | 0.537 | 0.537 | 0.538 | 0.543 | 0.55  | 0.557 | 0.563 | 0.569 | 0.572 | 0.572 | 0.575 | 0.579 | 0.584 | 0.589 |
| Chile                   | 0.501 | 0.506 | 0.509 | 0.517 | 0.527 | 0.536 | 0.544 | 0.55  | 0.554 | 0.557 | 0.558 | 0.562 | 0.569 | 0.575 | 0.579 | 0.583 | 0.586 | 0.587 | 0.589 | 0.593 |
| Uruguay                 | 0.516 | 0.517 | 0.519 | 0.522 | 0.526 | 0.53  | 0.533 | 0.537 | 0.543 | 0.55  | 0.557 | 0.562 | 0.567 | 0.572 | 0.577 | 0.579 | 0.581 | 0.582 | 0.583 | 0.587 |
| Western Europe          | 0.649 | 0.653 | 0.66  | 0.667 | 0.674 | 0.68  | 0.685 | 0.691 | 0.697 | 0.701 | 0.707 | 0.714 | 0.72  | 0.727 | 0.732 | 0.737 | 0.743 | 0.748 | 0.753 | 0.758 |
| Andorra                 | 0.803 | 0.805 | 0.807 | 0.81  | 0.812 | 0.815 | 0.818 | 0.82  | 0.822 | 0.824 | 0.826 | 0.829 | 0.832 | 0.835 | 0.838 | 0.841 | 0.843 | 0.844 | 0.846 | 0.847 |
| Austria                 | 0.674 | 0.68  | 0.688 | 0.697 | 0.704 | 0.712 | 0.72  | 0.726 | 0.73  | 0.732 | 0.733 | 0.736 | 0.741 | 0.748 | 0.754 | 0.759 | 0.763 | 0.767 | 0.771 | 0.774 |
| Belgium                 | 0.693 | 0.7   | 0.708 | 0.717 | 0.725 | 0.731 | 0.737 | 0.741 | 0.746 | 0.75  | 0.755 | 0.761 | 0.767 | 0.773 | 0.779 | 0.784 | 0.789 | 0.792 | 0.796 | 0.8   |
| Cyprus                  | 0.604 | 0.609 | 0.619 | 0.632 | 0.64  | 0.643 | 0.645 | 0.646 | 0.646 | 0.648 | 0.652 | 0.658 | 0.664 | 0.67  | 0.677 | 0.685 | 0.694 | 0.702 | 0.71  | 0.718 |
| Denmark                 | 0.756 | 0.758 | 0.764 | 0.769 | 0.771 | 0.777 | 0.785 | 0.791 | 0.796 | 0.802 | 0.809 | 0.815 | 0.821 | 0.825 | 0.828 | 0.832 | 0.836 | 0.839 | 0.841 | 0.843 |
| Finland                 | 0.715 | 0.723 | 0.731 | 0.736 | 0.739 | 0.743 | 0.748 | 0.754 | 0.759 | 0.765 | 0.769 | 0.772 | 0.776 | 0.782 | 0.789 | 0.795 | 0.799 | 0.803 | 0.807 | 0.811 |
| France                  | 0.62  | 0.626 | 0.63  | 0.64  | 0.657 | 0.667 | 0.673 | 0.679 | 0.686 | 0.692 | 0.698 | 0.705 | 0.713 | 0.721 | 0.728 | 0.735 | 0.742 | 0.75  | 0.756 | 0.763 |
| Germany                 | 0.693 | 0.699 | 0.71  | 0.717 | 0.722 | 0.727 | 0.73  | 0.735 | 0.741 | 0.744 | 0.747 | 0.752 | 0.757 | 0.763 | 0.768 | 0.768 | 0.771 | 0.777 | 0.78  | 0.781 |
| Greece                  | 0.596 | 0.602 | 0.607 | 0.61  | 0.611 | 0.614 | 0.617 | 0.62  | 0.623 | 0.627 | 0.634 | 0.643 | 0.651 | 0.66  | 0.67  | 0.68  | 0.689 | 0.696 | 0.703 | 0.711 |
| Iceland                 | 0.682 | 0.684 | 0.69  | 0.7   | 0.711 | 0.72  | 0.729 | 0.736 | 0.741 | 0.747 | 0.754 | 0.762 | 0.771 | 0.78  | 0.788 | 0.794 | 0.798 | 0.802 | 0.805 | 0.809 |
| Ireland                 | 0.641 | 0.642 | 0.645 | 0.65  | 0.656 | 0.663 | 0.669 | 0.675 | 0.68  | 0.684 | 0.69  | 0.698 | 0.706 | 0.713 | 0.721 | 0.727 | 0.733 | 0.74  | 0.746 | 0.751 |
| Israel                  | 0.626 | 0.631 | 0.637 | 0.64  | 0.641 | 0.642 | 0.648 | 0.657 | 0.664 | 0.67  | 0.676 | 0.679 | 0.682 | 0.689 | 0.696 | 0.705 | 0.713 | 0.719 | 0.724 | 0.729 |
| Italy                   | 0.636 | 0.639 | 0.643 | 0.647 | 0.653 | 0.662 | 0.666 | 0.675 | 0.688 | 0.694 | 0.701 | 0.71  | 0.717 | 0.724 | 0.731 | 0.738 | 0.744 | 0.75  | 0.756 | 0.762 |
| Luxembourg              | 0.744 | 0.753 | 0.76  | 0.768 | 0.774 | 0.779 | 0.783 | 0.787 | 0.791 | 0.794 | 0.798 | 0.802 | 0.808 | 0.813 | 0.818 | 0.823 | 0.828 | 0.831 | 0.835 | 0.84  |
| Malta                   | 0.623 | 0.627 | 0.632 | 0.635 | 0.639 | 0.646 | 0.656 | 0.665 | 0.673 | 0.68  | 0.687 | 0.694 | 0.7   | 0.706 | 0.71  | 0.714 | 0.717 | 0.72  | 0.723 | 0.726 |
| Netherlands             | 0.718 | 0.727 | 0.736 | 0.746 | 0.754 | 0.761 | 0.767 | 0.773 | 0.777 | 0.781 | 0.786 | 0.791 | 0.796 | 0.799 | 0.803 | 0.807 | 0.811 | 0.815 | 0.819 | 0.823 |
| Norway                  | 0.689 | 0.694 | 0.703 | 0.712 | 0.722 | 0.732 | 0.743 | 0.751 | 0.757 | 0.762 | 0.768 | 0.774 | 0.781 | 0.786 | 0.791 | 0.796 | 0.799 | 0.802 | 0.804 | 0.807 |
| Portugal                | 0.512 | 0.517 | 0.526 | 0.535 | 0.535 | 0.527 | 0.526 | 0.536 | 0.547 | 0.556 | 0.564 | 0.571 | 0.577 | 0.584 | 0.592 | 0.601 | 0.609 | 0.616 | 0.624 | 0.633 |
| Spain                   | 0.581 | 0.582 | 0.586 | 0.591 | 0.596 | 0.599 | 0.601 | 0.608 | 0.617 | 0.625 | 0.634 | 0.644 | 0.653 | 0.661 | 0.668 | 0.676 | 0.683 | 0.691 | 0.698 | 0.707 |
| Sweden                  | 0.703 | 0.705 | 0.71  | 0.715 | 0.721 | 0.73  | 0.738 | 0.744 | 0.749 | 0.753 | 0.757 | 0.763 | 0.768 | 0.773 | 0.776 | 0.779 | 0.78  | 0.781 | 0.781 | 0.781 |
| Stockholm               | 0.75  | 0.752 | 0.757 | 0.763 | 0.769 | 0.777 | 0.784 | 0.789 | 0.794 | 0.797 | 0.802 | 0.807 | 0.811 | 0.815 | 0.817 | 0.819 | 0.82  | 0.821 | 0.822 | 0.823 |
| Sweden except Stockholm | 0.691 | 0.694 | 0.698 | 0.703 | 0.709 | 0.718 | 0.726 | 0.733 | 0.738 | 0.742 | 0.746 | 0.751 | 0.757 | 0.762 | 0.765 | 0.768 | 0.77  | 0.771 | 0.77  | 0.771 |
| Switzerland             | 0.785 | 0.79  | 0.796 | 0.801 | 0.806 | 0.812 | 0.817 | 0.821 | 0.821 | 0.821 | 0.822 | 0.825 | 0.827 | 0.829 | 0.832 | 0.835 | 0.837 | 0.839 | 0.84  | 0.841 |
| United Kingdom          | 0.605 | 0.612 | 0.62  | 0.629 | 0.639 | 0.647 | 0.654 | 0.659 | 0.661 | 0.664 | 0.669 | 0.678 | 0.684 | 0.689 | 0.693 | 0.698 | 0.702 | 0.706 | 0.711 | 0.717 |
| England                 | 0.618 | 0.625 | 0.633 | 0.642 | 0.652 | 0.66  | 0.667 | 0.672 | 0.673 | 0.676 | 0.682 | 0.689 | 0.696 | 0.701 | 0.705 | 0.709 | 0.713 | 0.716 | 0.722 | 0.727 |
| East Midlands           | 0.59  | 0.598 | 0.606 | 0.615 | 0.625 | 0.634 | 0.641 | 0.646 | 0.648 | 0.651 | 0.657 | 0.665 | 0.672 | 0.677 | 0.681 | 0.685 | 0.689 | 0.693 | 0.699 | 0.705 |
| Derby                   | 0.591 | 0.599 | 0.608 | 0.617 | 0.628 | 0.636 | 0.644 | 0.649 | 0.65  | 0.652 | 0.658 | 0.667 | 0.674 | 0.68  | 0.684 | 0.689 | 0.694 | 0.698 | 0.704 | 0.71  |
| Derbyshire              | 0.581 | 0.588 | 0.597 | 0.606 | 0.616 | 0.625 | 0.632 | 0.637 | 0.639 | 0.642 | 0.648 | 0.656 | 0.663 | 0.668 | 0.672 | 0.676 | 0.679 | 0.683 | 0.688 | 0.693 |
| Leicester               | 0.577 | 0.585 | 0.593 | 0.603 | 0.613 | 0.621 | 0.629 | 0.634 | 0.635 | 0.638 | 0.643 | 0.652 | 0.659 | 0.665 | 0.67  | 0.676 | 0.682 | 0.687 | 0.694 | 0.702 |
| Leicestershire          | 0.609 | 0.616 | 0.624 | 0.634 | 0.643 | 0.651 | 0.658 | 0.663 | 0.666 | 0.669 | 0.675 | 0.683 | 0.689 | 0.694 | 0.698 | 0.702 | 0.706 | 0.709 | 0.715 | 0.721 |
| Lincolnshire            | 0.584 | 0.591 | 0.6   | 0.609 | 0.619 | 0.628 | 0.635 | 0.64  | 0.643 | 0.646 | 0.652 | 0.66  | 0.666 | 0.67  | 0.674 | 0.678 | 0.681 | 0.684 | 0.689 | 0.695 |
| Northamptonshire        | 0.593 | 0.6   | 0.609 | 0.619 | 0.629 | 0.638 | 0.646 | 0.651 | 0.653 | 0.656 | 0.662 | 0.671 | 0.677 | 0.682 | 0.686 | 0.69  | 0.693 | 0.697 | 0.702 | 0.708 |
| Nottingham              | 0.607 | 0.614 | 0.622 | 0.632 | 0.641 | 0.649 | 0.657 | 0.662 | 0.664 | 0.667 | 0.673 | 0.681 | 0.688 | 0.694 | 0.7   | 0.705 | 0.71  | 0.715 | 0.721 | 0.728 |
| Nottinghamshire         | 0.579 | 0.587 | 0.595 | 0.604 | 0.614 | 0.622 | 0.629 | 0.634 | 0.637 | 0.64  | 0.645 | 0.653 | 0.66  | 0.664 | 0.668 | 0.672 | 0.676 | 0.68  | 0.685 | 0.691 |
| Rutland                 | 0.609 | 0.617 | 0.625 | 0.634 | 0.644 | 0.652 | 0.659 | 0.663 | 0.665 | 0.667 | 0.673 | 0.681 | 0.687 | 0.692 | 0.697 | 0.702 | 0.708 | 0.712 | 0.719 | 0.725 |
| East of England         | 0.606 | 0.614 | 0.622 | 0.632 | 0.642 | 0.65  | 0.658 | 0.663 | 0.665 | 0.667 | 0.673 | 0.681 | 0.688 | 0.693 | 0.697 | 0.701 | 0.705 | 0.708 | 0.714 | 0.719 |
| Bedford                 | 0.608 | 0.615 | 0.624 | 0.633 | 0.643 | 0.652 | 0.659 | 0.664 | 0.666 | 0.668 | 0.674 | 0.682 | 0.689 | 0.695 | 0.699 | 0.704 | 0.708 | 0.712 | 0.718 | 0.724 |
| Cambridgeshire          | 0.631 | 0.638 | 0.646 | 0.655 | 0.665 | 0.673 | 0.68  | 0.685 | 0.688 | 0.691 | 0.697 | 0.704 | 0.711 | 0.715 | 0.72  | 0.724 | 0.728 | 0.732 | 0.738 | 0.744 |
| Central Bedfordshire    | 0.602 | 0.609 | 0.618 | 0.628 | 0.638 | 0.647 | 0.655 | 0.66  | 0.661 | 0.663 | 0.669 | 0.678 | 0.684 | 0.689 | 0.694 | 0.698 | 0.702 | 0.707 | 0.712 | 0.718 |
| Essex                   | 0.597 | 0.605 | 0.613 | 0.623 | 0.632 | 0.641 | 0.648 | 0.653 | 0.656 | 0.658 | 0.664 | 0.672 | 0.678 | 0.683 | 0.687 | 0.691 | 0.694 | 0.698 | 0.703 | 0.708 |
| Hertfordshire           | 0.631 | 0.638 | 0.646 | 0.655 | 0.665 | 0.673 | 0.681 | 0.686 | 0.688 | 0.691 | 0.697 | 0.705 | 0.711 | 0.716 | 0.72  | 0.725 | 0.729 | 0.732 | 0.738 | 0.743 |
| Luton                   | 0.586 | 0.594 | 0.603 | 0.613 | 0.624 | 0.633 | 0.641 | 0.646 | 0.648 | 0.65  | 0.655 | 0.664 | 0.671 | 0.677 | 0.681 | 0.685 | 0.689 | 0.693 | 0.699 | 0.705 |
| Norfolk                 | 0.596 | 0.603 | 0.612 | 0.621 | 0.631 | 0.64  | 0.647 | 0.652 | 0.654 | 0.657 | 0.663 | 0.671 | 0.677 | 0.682 | 0.686 | 0.69  | 0.694 | 0.697 | 0.702 | 0.707 |
| Peterborough            | 0.592 | 0.6   | 0.609 | 0.619 | 0.63  | 0.64  | 0.648 | 0.653 | 0.654 | 0.656 | 0.662 | 0.671 | 0.678 | 0.684 | 0.688 | 0.693 | 0.697 | 0.7   | 0.705 | 0.71  |
| Southend-on-Sea         | 0.575 | 0.583 | 0.591 | 0.601 | 0.611 | 0.619 | 0.627 | 0.632 | 0.634 | 0.637 | 0.643 | 0.652 | 0.658 | 0.663 | 0.667 | 0.671 | 0.676 | 0.68  | 0.686 | 0.691 |
| Suffolk                 | 0.593 | 0.601 | 0.61  | 0.62  | 0.63  | 0.639 | 0.647 | 0.651 | 0.653 | 0.655 | 0.661 | 0.669 | 0.676 | 0.681 | 0.685 | 0.69  | 0.694 | 0.697 | 0.703 | 0.708 |
| Thurrock                | 0.595 | 0.603 | 0.611 | 0.621 | 0.631 | 0.64  | 0.647 | 0.652 | 0.654 | 0.656 | 0.662 | 0.67  | 0.676 | 0.68  | 0.684 | 0.688 | 0.691 | 0.695 | 0.7   | 0.705 |
| Greater London          | 0.665 | 0.672 | 0.68  | 0.688 | 0.697 | 0.705 | 0.712 | 0.717 | 0.719 | 0.721 | 0.727 | 0.735 | 0.741 | 0.746 | 0.75  | 0.755 | 0.759 | 0.763 | 0.768 | 0.774 |
| Barking and Dagenham    | 0.592 | 0.6   | 0.609 | 0.618 | 0.628 | 0.637 | 0.644 | 0.649 | 0.    |       |       |       |       |       |       |       |       |       |       |       |

**Appendix Table 9. Socio-Demographic Index values for all estimated GBD 2017 locations, 1970–1989**

| Location                  | 1970  | 1971  | 1972  | 1973  | 1974  | 1975  | 1976  | 1977  | 1978  | 1979  | 1980  | 1981  | 1982  | 1983  | 1984  | 1985  | 1986  | 1987  | 1988  | 1989  |
|---------------------------|-------|-------|-------|-------|-------|-------|-------|-------|-------|-------|-------|-------|-------|-------|-------|-------|-------|-------|-------|-------|
| Havering                  | 0.613 | 0.621 | 0.628 | 0.637 | 0.646 | 0.654 | 0.661 | 0.666 | 0.668 | 0.671 | 0.677 | 0.684 | 0.69  | 0.694 | 0.697 | 0.7   | 0.703 | 0.705 | 0.71  | 0.715 |
| Hillingdon                | 0.665 | 0.672 | 0.681 | 0.69  | 0.699 | 0.708 | 0.715 | 0.72  | 0.722 | 0.725 | 0.731 | 0.739 | 0.746 | 0.751 | 0.755 | 0.759 | 0.763 | 0.766 | 0.771 | 0.776 |
| Hounslow                  | 0.648 | 0.656 | 0.664 | 0.674 | 0.684 | 0.693 | 0.7   | 0.705 | 0.707 | 0.71  | 0.716 | 0.724 | 0.731 | 0.736 | 0.74  | 0.744 | 0.748 | 0.752 | 0.757 | 0.764 |
| Islington                 | 0.702 | 0.709 | 0.717 | 0.726 | 0.736 | 0.744 | 0.751 | 0.755 | 0.756 | 0.757 | 0.762 | 0.769 | 0.775 | 0.779 | 0.784 | 0.789 | 0.793 | 0.796 | 0.801 | 0.806 |
| Kensington and Chelsea    | 0.73  | 0.736 | 0.742 | 0.75  | 0.757 | 0.764 | 0.77  | 0.775 | 0.778 | 0.782 | 0.787 | 0.793 | 0.799 | 0.804 | 0.808 | 0.813 | 0.817 | 0.821 | 0.826 | 0.833 |
| Kingston upon Thames      | 0.674 | 0.681 | 0.688 | 0.695 | 0.703 | 0.711 | 0.717 | 0.721 | 0.724 | 0.727 | 0.733 | 0.739 | 0.745 | 0.75  | 0.754 | 0.759 | 0.764 | 0.768 | 0.775 | 0.781 |
| Lambeth                   | 0.647 | 0.655 | 0.663 | 0.672 | 0.682 | 0.69  | 0.698 | 0.702 | 0.705 | 0.707 | 0.713 | 0.721 | 0.728 | 0.734 | 0.739 | 0.745 | 0.751 | 0.756 | 0.762 | 0.769 |
| Lewisham                  | 0.612 | 0.619 | 0.627 | 0.636 | 0.645 | 0.653 | 0.66  | 0.665 | 0.667 | 0.67  | 0.675 | 0.683 | 0.69  | 0.696 | 0.701 | 0.707 | 0.712 | 0.716 | 0.722 | 0.728 |
| Merton                    | 0.639 | 0.646 | 0.654 | 0.663 | 0.673 | 0.681 | 0.688 | 0.693 | 0.695 | 0.698 | 0.704 | 0.711 | 0.718 | 0.722 | 0.726 | 0.731 | 0.736 | 0.74  | 0.746 | 0.752 |
| Newham                    | 0.592 | 0.601 | 0.61  | 0.62  | 0.631 | 0.64  | 0.648 | 0.653 | 0.655 | 0.657 | 0.663 | 0.673 | 0.68  | 0.685 | 0.69  | 0.694 | 0.698 | 0.702 | 0.707 | 0.712 |
| Redbridge                 | 0.615 | 0.623 | 0.63  | 0.639 | 0.649 | 0.657 | 0.664 | 0.669 | 0.671 | 0.674 | 0.68  | 0.688 | 0.694 | 0.698 | 0.702 | 0.706 | 0.71  | 0.713 | 0.718 | 0.723 |
| Richmond upon Thames      | 0.683 | 0.69  | 0.697 | 0.705 | 0.713 | 0.72  | 0.727 | 0.731 | 0.734 | 0.737 | 0.743 | 0.749 | 0.755 | 0.76  | 0.764 | 0.768 | 0.773 | 0.777 | 0.782 | 0.789 |
| Southwark                 | 0.664 | 0.672 | 0.68  | 0.69  | 0.7   | 0.708 | 0.715 | 0.72  | 0.722 | 0.725 | 0.731 | 0.74  | 0.746 | 0.753 | 0.758 | 0.763 | 0.769 | 0.774 | 0.78  | 0.787 |
| Sutton                    | 0.621 | 0.629 | 0.637 | 0.646 | 0.656 | 0.664 | 0.671 | 0.676 | 0.679 | 0.682 | 0.688 | 0.695 | 0.702 | 0.706 | 0.71  | 0.713 | 0.716 | 0.72  | 0.725 | 0.73  |
| Tower Hamlets             | 0.645 | 0.653 | 0.662 | 0.672 | 0.683 | 0.692 | 0.7   | 0.704 | 0.703 | 0.703 | 0.708 | 0.717 | 0.724 | 0.729 | 0.734 | 0.739 | 0.745 | 0.749 | 0.755 | 0.761 |
| Waltham Forest            | 0.592 | 0.6   | 0.608 | 0.618 | 0.628 | 0.636 | 0.643 | 0.648 | 0.65  | 0.653 | 0.659 | 0.667 | 0.673 | 0.679 | 0.683 | 0.688 | 0.692 | 0.696 | 0.702 | 0.707 |
| Wandsworth                | 0.667 | 0.674 | 0.681 | 0.689 | 0.698 | 0.705 | 0.712 | 0.716 | 0.718 | 0.721 | 0.727 | 0.734 | 0.741 | 0.747 | 0.753 | 0.76  | 0.766 | 0.772 | 0.78  | 0.787 |
| Westminster               | 0.739 | 0.745 | 0.751 | 0.758 | 0.766 | 0.772 | 0.778 | 0.782 | 0.784 | 0.787 | 0.791 | 0.797 | 0.802 | 0.806 | 0.808 | 0.811 | 0.814 | 0.817 | 0.821 | 0.826 |
| North East England        | 0.573 | 0.581 | 0.59  | 0.6   | 0.61  | 0.619 | 0.627 | 0.632 | 0.634 | 0.637 | 0.643 | 0.651 | 0.658 | 0.663 | 0.667 | 0.671 | 0.676 | 0.679 | 0.685 | 0.691 |
| County Durham             | 0.568 | 0.576 | 0.585 | 0.594 | 0.604 | 0.613 | 0.62  | 0.626 | 0.628 | 0.631 | 0.637 | 0.645 | 0.652 | 0.658 | 0.662 | 0.667 | 0.671 | 0.674 | 0.679 | 0.685 |
| Darlington                | 0.583 | 0.591 | 0.6   | 0.611 | 0.622 | 0.631 | 0.639 | 0.644 | 0.646 | 0.649 | 0.655 | 0.664 | 0.671 | 0.676 | 0.68  | 0.684 | 0.687 | 0.689 | 0.693 | 0.698 |
| Gateshead                 | 0.577 | 0.585 | 0.594 | 0.604 | 0.614 | 0.623 | 0.631 | 0.636 | 0.638 | 0.64  | 0.646 | 0.655 | 0.661 | 0.666 | 0.67  | 0.674 | 0.679 | 0.682 | 0.688 | 0.694 |
| Hartlepool                | 0.556 | 0.564 | 0.573 | 0.584 | 0.595 | 0.604 | 0.612 | 0.617 | 0.619 | 0.621 | 0.627 | 0.636 | 0.643 | 0.648 | 0.651 | 0.655 | 0.658 | 0.661 | 0.666 | 0.672 |
| Middlesbrough             | 0.56  | 0.569 | 0.578 | 0.588 | 0.599 | 0.609 | 0.617 | 0.622 | 0.623 | 0.625 | 0.631 | 0.64  | 0.647 | 0.652 | 0.656 | 0.66  | 0.665 | 0.669 | 0.675 | 0.682 |
| Newcastle upon Tyne       | 0.609 | 0.617 | 0.625 | 0.634 | 0.643 | 0.651 | 0.658 | 0.663 | 0.666 | 0.669 | 0.675 | 0.683 | 0.689 | 0.695 | 0.699 | 0.704 | 0.709 | 0.715 | 0.721 | 0.729 |
| North Tyneside            | 0.576 | 0.584 | 0.592 | 0.602 | 0.612 | 0.621 | 0.629 | 0.634 | 0.636 | 0.639 | 0.645 | 0.653 | 0.659 | 0.664 | 0.668 | 0.671 | 0.675 | 0.679 | 0.685 | 0.691 |
| Northumberland            | 0.574 | 0.582 | 0.591 | 0.601 | 0.611 | 0.62  | 0.628 | 0.633 | 0.635 | 0.638 | 0.644 | 0.653 | 0.66  | 0.665 | 0.67  | 0.674 | 0.678 | 0.681 | 0.687 | 0.692 |
| Redcar and Cleveland      | 0.549 | 0.557 | 0.566 | 0.576 | 0.587 | 0.596 | 0.604 | 0.608 | 0.61  | 0.612 | 0.618 | 0.627 | 0.634 | 0.639 | 0.643 | 0.646 | 0.65  | 0.653 | 0.659 | 0.665 |
| South Tyneside            | 0.545 | 0.553 | 0.562 | 0.572 | 0.582 | 0.591 | 0.599 | 0.604 | 0.606 | 0.609 | 0.615 | 0.623 | 0.629 | 0.633 | 0.636 | 0.639 | 0.643 | 0.646 | 0.652 | 0.659 |
| Stockton-on-Tees          | 0.581 | 0.589 | 0.598 | 0.609 | 0.62  | 0.629 | 0.637 | 0.642 | 0.644 | 0.646 | 0.652 | 0.661 | 0.667 | 0.672 | 0.676 | 0.68  | 0.684 | 0.687 | 0.693 | 0.699 |
| Sunderland                | 0.563 | 0.571 | 0.58  | 0.59  | 0.601 | 0.61  | 0.618 | 0.623 | 0.624 | 0.626 | 0.632 | 0.641 | 0.648 | 0.654 | 0.658 | 0.663 | 0.667 | 0.671 | 0.677 | 0.684 |
| North West England        | 0.6   | 0.608 | 0.616 | 0.625 | 0.635 | 0.643 | 0.65  | 0.655 | 0.657 | 0.659 | 0.665 | 0.673 | 0.679 | 0.684 | 0.688 | 0.692 | 0.696 | 0.7   | 0.705 | 0.711 |
| Blackburn with Darwen     | 0.569 | 0.577 | 0.586 | 0.597 | 0.608 | 0.617 | 0.625 | 0.63  | 0.631 | 0.633 | 0.639 | 0.648 | 0.655 | 0.661 | 0.665 | 0.669 | 0.673 | 0.676 | 0.681 | 0.687 |
| Blackpool                 | 0.569 | 0.576 | 0.585 | 0.594 | 0.604 | 0.612 | 0.62  | 0.625 | 0.628 | 0.631 | 0.637 | 0.645 | 0.651 | 0.655 | 0.658 | 0.661 | 0.663 | 0.666 | 0.671 | 0.676 |
| Bolton                    | 0.583 | 0.591 | 0.599 | 0.609 | 0.619 | 0.628 | 0.635 | 0.64  | 0.641 | 0.644 | 0.649 | 0.658 | 0.664 | 0.669 | 0.673 | 0.677 | 0.681 | 0.685 | 0.69  | 0.696 |
| Bury                      | 0.589 | 0.597 | 0.605 | 0.615 | 0.624 | 0.632 | 0.64  | 0.644 | 0.646 | 0.649 | 0.655 | 0.663 | 0.669 | 0.673 | 0.677 | 0.68  | 0.684 | 0.687 | 0.692 | 0.698 |
| Cheshire East             | 0.635 | 0.642 | 0.65  | 0.659 | 0.669 | 0.677 | 0.684 | 0.688 | 0.691 | 0.693 | 0.699 | 0.707 | 0.712 | 0.717 | 0.721 | 0.725 | 0.728 | 0.732 | 0.737 | 0.743 |
| Cheshire West and Chester | 0.626 | 0.633 | 0.641 | 0.65  | 0.66  | 0.668 | 0.675 | 0.679 | 0.681 | 0.684 | 0.69  | 0.697 | 0.703 | 0.708 | 0.712 | 0.716 | 0.72  | 0.723 | 0.729 | 0.735 |
| Cumbria                   | 0.606 | 0.614 | 0.622 | 0.631 | 0.641 | 0.649 | 0.656 | 0.661 | 0.663 | 0.665 | 0.671 | 0.679 | 0.685 | 0.69  | 0.694 | 0.698 | 0.702 | 0.705 | 0.71  | 0.715 |
| Halton                    | 0.586 | 0.594 | 0.603 | 0.613 | 0.624 | 0.632 | 0.64  | 0.645 | 0.647 | 0.649 | 0.655 | 0.663 | 0.669 | 0.674 | 0.677 | 0.68  | 0.683 | 0.686 | 0.692 | 0.698 |
| Knowsley                  | 0.575 | 0.582 | 0.591 | 0.6   | 0.61  | 0.618 | 0.626 | 0.63  | 0.632 | 0.634 | 0.639 | 0.648 | 0.654 | 0.659 | 0.664 | 0.668 | 0.672 | 0.675 | 0.68  | 0.686 |
| Lancashire                | 0.603 | 0.611 | 0.619 | 0.629 | 0.638 | 0.647 | 0.654 | 0.659 | 0.661 | 0.663 | 0.669 | 0.677 | 0.683 | 0.688 | 0.692 | 0.696 | 0.7   | 0.703 | 0.708 | 0.715 |
| Liverpool                 | 0.602 | 0.609 | 0.617 | 0.626 | 0.635 | 0.642 | 0.649 | 0.654 | 0.656 | 0.659 | 0.664 | 0.672 | 0.678 | 0.683 | 0.687 | 0.692 | 0.697 | 0.702 | 0.708 | 0.715 |
| Manchester                | 0.623 | 0.63  | 0.638 | 0.647 | 0.657 | 0.665 | 0.672 | 0.677 | 0.679 | 0.682 | 0.688 | 0.696 | 0.703 | 0.709 | 0.713 | 0.718 | 0.723 | 0.728 | 0.734 | 0.741 |
| Oldham                    | 0.569 | 0.577 | 0.586 | 0.596 | 0.606 | 0.615 | 0.622 | 0.627 | 0.628 | 0.631 | 0.636 | 0.645 | 0.652 | 0.657 | 0.66  | 0.664 | 0.668 | 0.671 | 0.676 | 0.681 |
| Rochdale                  | 0.571 | 0.579 | 0.588 | 0.598 | 0.608 | 0.617 | 0.624 | 0.629 | 0.631 | 0.633 | 0.639 | 0.648 | 0.654 | 0.659 | 0.663 | 0.666 | 0.67  | 0.672 | 0.677 | 0.682 |
| Salford                   | 0.592 | 0.599 | 0.608 | 0.617 | 0.627 | 0.636 | 0.643 | 0.648 | 0.65  | 0.652 | 0.658 | 0.666 | 0.672 | 0.677 | 0.681 | 0.685 | 0.689 | 0.692 | 0.697 | 0.703 |
| Sefton                    | 0.593 | 0.601 | 0.608 | 0.617 | 0.627 | 0.634 | 0.641 | 0.646 | 0.648 | 0.651 | 0.656 | 0.664 | 0.67  | 0.674 | 0.678 | 0.682 | 0.686 | 0.689 | 0.694 | 0.701 |
| St Helens                 | 0.571 | 0.579 | 0.587 | 0.596 | 0.605 | 0.613 | 0.62  | 0.625 | 0.627 | 0.629 | 0.635 | 0.643 | 0.65  | 0.655 | 0.659 | 0.663 | 0.667 | 0.67  | 0.675 | 0.681 |
| Stockport                 | 0.613 | 0.62  | 0.628 | 0.637 | 0.646 | 0.654 | 0.661 | 0.666 | 0.668 | 0.67  | 0.676 | 0.683 | 0.69  | 0.694 | 0.698 | 0.702 | 0.706 | 0.71  | 0.715 | 0.722 |
| Tameside                  | 0.577 | 0.584 | 0.593 | 0.602 | 0.612 | 0.62  | 0.628 | 0.633 | 0.634 | 0.637 | 0.643 | 0.651 | 0.657 | 0.662 | 0.666 | 0.669 | 0.673 | 0.676 | 0.681 | 0.687 |
| Trafford                  | 0.635 | 0.642 | 0.65  | 0.659 | 0.669 | 0.677 | 0.684 | 0.689 | 0.691 | 0.693 | 0.699 | 0.706 | 0.712 | 0.717 | 0.721 | 0.725 | 0.73  | 0.734 | 0.739 | 0.745 |
| Warrington                | 0.623 | 0.63  | 0.638 | 0.648 | 0.658 | 0.666 | 0.673 | 0.678 | 0.68  | 0.682 | 0.688 | 0.696 | 0.702 | 0.707 | 0.711 | 0.715 | 0.719 | 0.722 | 0.728 | 0.734 |
| Wigan                     | 0.575 | 0.583 | 0.591 | 0.601 | 0.61  | 0.619 | 0.626 | 0.631 | 0.632 | 0.635 | 0.64  | 0.648 | 0.655 | 0.66  | 0.664 | 0.668 | 0.672 | 0.676 | 0.681 | 0.687 |
| Wirral                    | 0.581 | 0.589 | 0.597 | 0.607 | 0.616 | 0.625 | 0.632 | 0.637 | 0.638 | 0.641 | 0.647 | 0.655 | 0.661 | 0.666 | 0.669 | 0.673 | 0.676 | 0.679 | 0.685 | 0.69  |
| South East England        | 0.639 | 0.646 | 0.654 | 0.663 | 0.672 | 0.68  | 0.687 | 0.692 | 0.694 | 0.696 | 0.701 | 0.709 | 0.715 | 0.72  | 0.724 | 0.727 | 0.731 | 0.735 | 0.739 | 0.745 |
| Bracknell Forest          | 0.645 | 0.653 | 0.66  | 0.669 | 0.679 | 0.687 | 0.694 | 0.698 | 0.699 | 0.701 | 0.707 | 0.715 | 0.721 | 0.727 | 0.732 | 0.736 | 0.74  | 0.744 | 0.749 | 0.755 |
| Brighton and Hove         | 0.654 | 0.66  | 0.667 | 0.674 | 0     |       |       |       |       |       |       |       |       |       |       |       |       |       |       |       |

Appendix Table 9. Socio-Demographic Index values for all estimated GBD 2017 locations, 1970–1989

| Location                     | 1970  | 1971  | 1972  | 1973  | 1974  | 1975  | 1976  | 1977  | 1978  | 1979  | 1980  | 1981  | 1982  | 1983  | 1984  | 1985  | 1986  | 1987  | 1988  | 1989  |
|------------------------------|-------|-------|-------|-------|-------|-------|-------|-------|-------|-------|-------|-------|-------|-------|-------|-------|-------|-------|-------|-------|
| West Berkshire               | 0.659 | 0.667 | 0.675 | 0.685 | 0.695 | 0.703 | 0.711 | 0.715 | 0.717 | 0.719 | 0.724 | 0.733 | 0.739 | 0.743 | 0.747 | 0.751 | 0.755 | 0.758 | 0.764 | 0.769 |
| West Sussex                  | 0.629 | 0.636 | 0.644 | 0.654 | 0.663 | 0.671 | 0.678 | 0.683 | 0.684 | 0.687 | 0.692 | 0.7   | 0.706 | 0.711 | 0.715 | 0.719 | 0.722 | 0.725 | 0.73  | 0.735 |
| Windsor and Maidenhead       | 0.67  | 0.677 | 0.685 | 0.693 | 0.702 | 0.71  | 0.717 | 0.721 | 0.723 | 0.725 | 0.731 | 0.738 | 0.744 | 0.748 | 0.752 | 0.756 | 0.761 | 0.764 | 0.769 | 0.774 |
| Wokingham                    | 0.67  | 0.677 | 0.684 | 0.693 | 0.701 | 0.709 | 0.715 | 0.72  | 0.722 | 0.724 | 0.729 | 0.736 | 0.741 | 0.745 | 0.749 | 0.753 | 0.757 | 0.761 | 0.767 | 0.773 |
| South West England           | 0.614 | 0.622 | 0.63  | 0.639 | 0.648 | 0.656 | 0.664 | 0.668 | 0.67  | 0.673 | 0.679 | 0.687 | 0.693 | 0.698 | 0.702 | 0.705 | 0.709 | 0.713 | 0.718 | 0.724 |
| Bath and North East Somerset | 0.64  | 0.647 | 0.654 | 0.662 | 0.67  | 0.676 | 0.683 | 0.688 | 0.691 | 0.694 | 0.699 | 0.706 | 0.712 | 0.717 | 0.721 | 0.725 | 0.73  | 0.734 | 0.74  | 0.746 |
| Bournemouth                  | 0.62  | 0.627 | 0.634 | 0.642 | 0.65  | 0.657 | 0.664 | 0.669 | 0.672 | 0.675 | 0.681 | 0.688 | 0.694 | 0.698 | 0.703 | 0.708 | 0.713 | 0.718 | 0.724 | 0.73  |
| Bristol, City of             | 0.644 | 0.651 | 0.659 | 0.667 | 0.676 | 0.684 | 0.691 | 0.696 | 0.698 | 0.701 | 0.706 | 0.714 | 0.72  | 0.726 | 0.73  | 0.735 | 0.74  | 0.744 | 0.751 | 0.757 |
| Cornwall                     | 0.585 | 0.593 | 0.602 | 0.611 | 0.621 | 0.63  | 0.637 | 0.642 | 0.644 | 0.646 | 0.652 | 0.66  | 0.666 | 0.67  | 0.674 | 0.677 | 0.681 | 0.684 | 0.689 | 0.695 |
| Devon                        | 0.606 | 0.614 | 0.622 | 0.631 | 0.64  | 0.648 | 0.655 | 0.66  | 0.662 | 0.665 | 0.671 | 0.679 | 0.685 | 0.69  | 0.693 | 0.697 | 0.701 | 0.704 | 0.709 | 0.715 |
| Dorset                       | 0.605 | 0.613 | 0.621 | 0.63  | 0.64  | 0.648 | 0.655 | 0.66  | 0.662 | 0.665 | 0.671 | 0.679 | 0.685 | 0.689 | 0.692 | 0.696 | 0.699 | 0.702 | 0.707 | 0.712 |
| Gloucestershire              | 0.62  | 0.627 | 0.635 | 0.644 | 0.654 | 0.662 | 0.669 | 0.674 | 0.676 | 0.679 | 0.684 | 0.692 | 0.699 | 0.704 | 0.708 | 0.712 | 0.716 | 0.719 | 0.724 | 0.73  |
| North Somerset               | 0.598 | 0.605 | 0.614 | 0.623 | 0.633 | 0.641 | 0.648 | 0.653 | 0.655 | 0.657 | 0.663 | 0.671 | 0.677 | 0.682 | 0.687 | 0.691 | 0.694 | 0.698 | 0.704 | 0.71  |
| Plymouth                     | 0.601 | 0.608 | 0.616 | 0.626 | 0.636 | 0.644 | 0.651 | 0.656 | 0.658 | 0.66  | 0.666 | 0.674 | 0.681 | 0.687 | 0.692 | 0.697 | 0.702 | 0.706 | 0.713 | 0.719 |
| Poole                        | 0.613 | 0.62  | 0.629 | 0.639 | 0.648 | 0.657 | 0.664 | 0.669 | 0.671 | 0.674 | 0.68  | 0.687 | 0.693 | 0.697 | 0.7   | 0.704 | 0.708 | 0.712 | 0.717 | 0.723 |
| Somerset                     | 0.6   | 0.608 | 0.616 | 0.626 | 0.636 | 0.645 | 0.652 | 0.657 | 0.659 | 0.661 | 0.667 | 0.675 | 0.682 | 0.687 | 0.69  | 0.694 | 0.697 | 0.699 | 0.704 | 0.708 |
| South Gloucestershire        | 0.633 | 0.641 | 0.649 | 0.658 | 0.667 | 0.676 | 0.683 | 0.688 | 0.69  | 0.693 | 0.698 | 0.706 | 0.712 | 0.717 | 0.721 | 0.725 | 0.729 | 0.732 | 0.738 | 0.743 |
| Swindon                      | 0.628 | 0.636 | 0.644 | 0.654 | 0.664 | 0.673 | 0.681 | 0.686 | 0.687 | 0.689 | 0.695 | 0.703 | 0.71  | 0.715 | 0.719 | 0.723 | 0.727 | 0.73  | 0.736 | 0.742 |
| Torbay                       | 0.584 | 0.592 | 0.601 | 0.61  | 0.62  | 0.628 | 0.636 | 0.641 | 0.643 | 0.646 | 0.652 | 0.66  | 0.665 | 0.669 | 0.672 | 0.676 | 0.68  | 0.683 | 0.689 | 0.694 |
| Wiltshire                    | 0.612 | 0.62  | 0.628 | 0.638 | 0.648 | 0.656 | 0.664 | 0.668 | 0.67  | 0.672 | 0.677 | 0.686 | 0.693 | 0.698 | 0.702 | 0.706 | 0.71  | 0.713 | 0.718 | 0.722 |
| West Midlands                | 0.588 | 0.595 | 0.604 | 0.613 | 0.623 | 0.632 | 0.639 | 0.644 | 0.646 | 0.649 | 0.655 | 0.663 | 0.669 | 0.674 | 0.679 | 0.683 | 0.687 | 0.69  | 0.696 | 0.702 |
| Birmingham                   | 0.582 | 0.59  | 0.598 | 0.608 | 0.618 | 0.627 | 0.635 | 0.639 | 0.641 | 0.643 | 0.649 | 0.658 | 0.665 | 0.67  | 0.675 | 0.68  | 0.685 | 0.689 | 0.695 | 0.702 |
| Coventry                     | 0.601 | 0.608 | 0.617 | 0.626 | 0.636 | 0.644 | 0.652 | 0.656 | 0.658 | 0.661 | 0.666 | 0.674 | 0.681 | 0.686 | 0.69  | 0.694 | 0.698 | 0.702 | 0.709 | 0.716 |
| Dudley                       | 0.576 | 0.583 | 0.592 | 0.601 | 0.611 | 0.619 | 0.627 | 0.632 | 0.633 | 0.636 | 0.642 | 0.65  | 0.656 | 0.661 | 0.665 | 0.669 | 0.673 | 0.677 | 0.682 | 0.688 |
| Herefordshire, County of     | 0.591 | 0.599 | 0.607 | 0.617 | 0.627 | 0.635 | 0.643 | 0.648 | 0.65  | 0.653 | 0.659 | 0.667 | 0.674 | 0.678 | 0.682 | 0.685 | 0.688 | 0.691 | 0.695 | 0.701 |
| Sandwell                     | 0.563 | 0.571 | 0.579 | 0.589 | 0.599 | 0.608 | 0.615 | 0.62  | 0.621 | 0.623 | 0.629 | 0.638 | 0.645 | 0.65  | 0.654 | 0.658 | 0.663 | 0.666 | 0.672 | 0.678 |
| Shropshire                   | 0.594 | 0.601 | 0.61  | 0.619 | 0.629 | 0.637 | 0.645 | 0.65  | 0.652 | 0.655 | 0.661 | 0.669 | 0.675 | 0.679 | 0.683 | 0.687 | 0.69  | 0.693 | 0.698 | 0.704 |
| Solihull                     | 0.621 | 0.629 | 0.637 | 0.647 | 0.656 | 0.665 | 0.672 | 0.677 | 0.679 | 0.682 | 0.688 | 0.695 | 0.701 | 0.706 | 0.709 | 0.712 | 0.715 | 0.718 | 0.723 | 0.728 |
| Staffordshire                | 0.592 | 0.599 | 0.607 | 0.617 | 0.627 | 0.635 | 0.642 | 0.647 | 0.649 | 0.652 | 0.658 | 0.666 | 0.672 | 0.677 | 0.68  | 0.684 | 0.688 | 0.691 | 0.696 | 0.702 |
| Stoke-on-Trent               | 0.569 | 0.576 | 0.584 | 0.594 | 0.604 | 0.612 | 0.62  | 0.624 | 0.626 | 0.628 | 0.634 | 0.643 | 0.649 | 0.655 | 0.659 | 0.664 | 0.668 | 0.672 | 0.677 | 0.684 |
| Telford and Wrekin           | 0.592 | 0.6   | 0.609 | 0.619 | 0.63  | 0.639 | 0.647 | 0.652 | 0.653 | 0.655 | 0.661 | 0.67  | 0.677 | 0.683 | 0.687 | 0.691 | 0.695 | 0.698 | 0.703 | 0.709 |
| Walsall                      | 0.565 | 0.572 | 0.581 | 0.59  | 0.6   | 0.609 | 0.616 | 0.621 | 0.623 | 0.625 | 0.631 | 0.639 | 0.646 | 0.651 | 0.655 | 0.659 | 0.663 | 0.666 | 0.671 | 0.676 |
| Warwickshire                 | 0.615 | 0.622 | 0.63  | 0.64  | 0.65  | 0.658 | 0.665 | 0.67  | 0.672 | 0.675 | 0.681 | 0.689 | 0.695 | 0.7   | 0.704 | 0.707 | 0.711 | 0.715 | 0.72  | 0.726 |
| Wolverhampton                | 0.573 | 0.581 | 0.589 | 0.599 | 0.609 | 0.618 | 0.625 | 0.63  | 0.631 | 0.634 | 0.64  | 0.648 | 0.655 | 0.66  | 0.664 | 0.668 | 0.672 | 0.675 | 0.68  | 0.686 |
| Worcestershire               | 0.591 | 0.599 | 0.607 | 0.617 | 0.626 | 0.635 | 0.642 | 0.647 | 0.65  | 0.653 | 0.659 | 0.666 | 0.673 | 0.678 | 0.681 | 0.685 | 0.688 | 0.692 | 0.697 | 0.702 |
| Yorkshire and the Humber     | 0.59  | 0.598 | 0.606 | 0.616 | 0.626 | 0.634 | 0.642 | 0.647 | 0.649 | 0.652 | 0.658 | 0.666 | 0.672 | 0.677 | 0.681 | 0.686 | 0.69  | 0.694 | 0.699 | 0.705 |
| Barnsley                     | 0.558 | 0.566 | 0.575 | 0.584 | 0.594 | 0.603 | 0.61  | 0.615 | 0.617 | 0.619 | 0.625 | 0.634 | 0.64  | 0.645 | 0.649 | 0.653 | 0.657 | 0.661 | 0.665 | 0.671 |
| Bradford                     | 0.567 | 0.575 | 0.584 | 0.595 | 0.605 | 0.615 | 0.623 | 0.627 | 0.629 | 0.631 | 0.637 | 0.646 | 0.653 | 0.658 | 0.663 | 0.668 | 0.672 | 0.676 | 0.682 | 0.688 |
| Calderdale                   | 0.585 | 0.593 | 0.602 | 0.612 | 0.623 | 0.632 | 0.64  | 0.645 | 0.647 | 0.649 | 0.655 | 0.664 | 0.67  | 0.675 | 0.679 | 0.683 | 0.687 | 0.691 | 0.697 | 0.703 |
| Doncaster                    | 0.557 | 0.566 | 0.574 | 0.584 | 0.595 | 0.603 | 0.611 | 0.616 | 0.618 | 0.62  | 0.626 | 0.635 | 0.641 | 0.646 | 0.649 | 0.653 | 0.657 | 0.66  | 0.665 | 0.67  |
| East Riding of Yorkshire     | 0.598 | 0.605 | 0.614 | 0.623 | 0.633 | 0.641 | 0.648 | 0.653 | 0.656 | 0.659 | 0.665 | 0.673 | 0.679 | 0.684 | 0.687 | 0.691 | 0.694 | 0.698 | 0.703 | 0.709 |
| Kingston upon Hull, City of  | 0.567 | 0.576 | 0.584 | 0.594 | 0.605 | 0.613 | 0.621 | 0.626 | 0.628 | 0.631 | 0.637 | 0.645 | 0.652 | 0.657 | 0.66  | 0.664 | 0.668 | 0.672 | 0.677 | 0.683 |
| Kirklees                     | 0.579 | 0.587 | 0.596 | 0.606 | 0.616 | 0.624 | 0.632 | 0.637 | 0.639 | 0.641 | 0.647 | 0.656 | 0.662 | 0.668 | 0.672 | 0.677 | 0.681 | 0.685 | 0.691 | 0.697 |
| Leeds                        | 0.617 | 0.624 | 0.632 | 0.641 | 0.65  | 0.657 | 0.664 | 0.669 | 0.672 | 0.675 | 0.681 | 0.688 | 0.695 | 0.7   | 0.705 | 0.709 | 0.714 | 0.719 | 0.725 | 0.732 |
| North East Lincolnshire      | 0.578 | 0.586 | 0.595 | 0.606 | 0.617 | 0.626 | 0.634 | 0.639 | 0.641 | 0.643 | 0.649 | 0.658 | 0.664 | 0.669 | 0.672 | 0.675 | 0.679 | 0.682 | 0.687 | 0.693 |
| North Lincolnshire           | 0.585 | 0.593 | 0.602 | 0.612 | 0.622 | 0.631 | 0.639 | 0.644 | 0.645 | 0.648 | 0.654 | 0.662 | 0.669 | 0.674 | 0.677 | 0.681 | 0.685 | 0.687 | 0.692 | 0.698 |
| North Yorkshire              | 0.607 | 0.615 | 0.623 | 0.633 | 0.643 | 0.651 | 0.658 | 0.663 | 0.666 | 0.669 | 0.675 | 0.683 | 0.689 | 0.694 | 0.698 | 0.702 | 0.705 | 0.709 | 0.714 | 0.719 |
| Rotherham                    | 0.565 | 0.573 | 0.582 | 0.592 | 0.602 | 0.61  | 0.618 | 0.623 | 0.624 | 0.627 | 0.633 | 0.641 | 0.648 | 0.653 | 0.656 | 0.66  | 0.664 | 0.667 | 0.672 | 0.677 |
| Sheffield                    | 0.609 | 0.616 | 0.624 | 0.633 | 0.641 | 0.649 | 0.656 | 0.661 | 0.664 | 0.667 | 0.673 | 0.681 | 0.687 | 0.692 | 0.696 | 0.7   | 0.705 | 0.709 | 0.715 | 0.721 |
| Wakefield                    | 0.574 | 0.582 | 0.591 | 0.601 | 0.611 | 0.62  | 0.627 | 0.632 | 0.634 | 0.637 | 0.643 | 0.651 | 0.658 | 0.662 | 0.666 | 0.67  | 0.674 | 0.677 | 0.682 | 0.688 |
| York                         | 0.641 | 0.648 | 0.656 | 0.664 | 0.673 | 0.68  | 0.687 | 0.692 | 0.695 | 0.698 | 0.704 | 0.711 | 0.717 | 0.723 | 0.727 | 0.732 | 0.737 | 0.742 | 0.748 | 0.756 |
| Northern Ireland             | 0.574 | 0.582 | 0.59  | 0.598 | 0.607 | 0.614 | 0.622 | 0.627 | 0.628 | 0.63  | 0.638 | 0.649 | 0.657 | 0.663 | 0.668 | 0.673 | 0.679 | 0.685 | 0.695 | 0.704 |
| Scotland                     | 0.541 | 0.547 | 0.556 | 0.563 | 0.571 | 0.58  | 0.59  | 0.596 | 0.598 | 0.601 | 0.607 | 0.616 | 0.624 | 0.631 | 0.636 | 0.642 | 0.648 | 0.653 | 0.66  | 0.667 |
| Wales                        | 0.503 | 0.51  | 0.519 | 0.529 | 0.54  | 0.549 | 0.557 | 0.563 | 0.566 | 0.569 | 0.576 | 0.586 | 0.593 | 0.6   | 0.605 | 0.61  | 0.615 | 0.62  | 0.627 | 0.635 |
| Latin America and Caribbean  | 0.372 | 0.378 | 0.385 | 0.392 | 0.399 | 0.406 | 0.413 | 0.421 | 0.428 | 0.434 | 0.441 | 0.447 | 0.453 | 0.46  | 0.466 | 0.472 | 0.477 | 0.483 | 0.488 | 0.493 |
| Andean Latin America         | 0.352 | 0.358 | 0.364 | 0.371 | 0.377 | 0.385 | 0.395 | 0.404 | 0.412 | 0.419 | 0.425 | 0.432 | 0.44  | 0.448 | 0.455 | 0.461 | 0.467 | 0.472 | 0.477 | 0.48  |
| Bolivia                      | 0.302 | 0.31  | 0.318 | 0.324 | 0.329 | 0.332 | 0.332 | 0.332 | 0.335 | 0.34  | 0.346 | 0.352 | 0.36  | 0.366 | 0.371 | 0.375 | 0.38  | 0.388 | 0.396 | 0.4   |
| Ecuador                      | 0.384 | 0.387 | 0.395 |       |       |       |       |       |       |       |       |       |       |       |       |       |       |       |       |       |

Appendix Table 9. Socio-Demographic Index values for all estimated GBD 2017 locations, 1970–1989

| Location                         | 1970  | 1971  | 1972  | 1973  | 1974  | 1975  | 1976   | 1977  | 1978  | 1979  | 1980  | 1981  | 1982  | 1983  | 1984  | 1985  | 1986  | 1987  | 1988  | 1989  |
|----------------------------------|-------|-------|-------|-------|-------|-------|--------|-------|-------|-------|-------|-------|-------|-------|-------|-------|-------|-------|-------|-------|
| Jamaica                          | 0.406 | 0.416 | 0.429 | 0.442 | 0.453 | 0.465 | 0.476  | 0.486 | 0.493 | 0.498 | 0.502 | 0.508 | 0.513 | 0.519 | 0.524 | 0.531 | 0.537 | 0.54  | 0.542 | 0.543 |
| Puerto Rico                      | 0.564 | 0.572 | 0.579 | 0.586 | 0.593 | 0.596 | 0.597  | 0.6   | 0.61  | 0.62  | 0.628 | 0.637 | 0.648 | 0.657 | 0.664 | 0.668 | 0.672 | 0.675 | 0.677 | 0.68  |
| Saint Lucia                      | 0.333 | 0.342 | 0.352 | 0.362 | 0.373 | 0.383 | 0.395  | 0.406 | 0.417 | 0.426 | 0.432 | 0.436 | 0.44  | 0.445 | 0.451 | 0.461 | 0.471 | 0.482 | 0.491 | 0.5   |
| Saint Vincent and the Grenadines | 0.274 | 0.283 | 0.298 | 0.314 | 0.329 | 0.342 | 0.354  | 0.361 | 0.367 | 0.373 | 0.379 | 0.385 | 0.395 | 0.407 | 0.419 | 0.43  | 0.44  | 0.448 | 0.455 | 0.46  |
| Suriname                         | 0.395 | 0.406 | 0.415 | 0.422 | 0.43  | 0.436 | 0.438  | 0.443 | 0.45  | 0.455 | 0.457 | 0.458 | 0.461 | 0.468 | 0.478 | 0.491 | 0.504 | 0.512 | 0.517 | 0.523 |
| Trinidad and Tobago              | 0.497 | 0.505 | 0.513 | 0.52  | 0.528 | 0.534 | 0.54   | 0.545 | 0.548 | 0.552 | 0.556 | 0.559 | 0.563 | 0.568 | 0.573 | 0.579 | 0.585 | 0.59  | 0.594 | 0.597 |
| Virgin Islands                   | 0.514 | 0.531 | 0.551 | 0.57  | 0.586 | 0.6   | 0.611  | 0.619 | 0.626 | 0.631 | 0.635 | 0.638 | 0.64  | 0.643 | 0.647 | 0.65  | 0.652 | 0.655 | 0.657 | 0.659 |
| Central Latin America            | 0.368 | 0.376 | 0.384 | 0.391 | 0.398 | 0.405 | 0.413  | 0.422 | 0.429 | 0.436 | 0.442 | 0.45  | 0.457 | 0.463 | 0.47  | 0.475 | 0.479 | 0.483 | 0.487 | 0.49  |
| Colombia                         | 0.36  | 0.37  | 0.379 | 0.387 | 0.395 | 0.402 | 0.409  | 0.416 | 0.423 | 0.43  | 0.438 | 0.445 | 0.451 | 0.457 | 0.463 | 0.468 | 0.472 | 0.475 | 0.478 | 0.481 |
| Costa Rica                       | 0.427 | 0.436 | 0.445 | 0.451 | 0.454 | 0.455 | 0.457  | 0.459 | 0.464 | 0.471 | 0.477 | 0.483 | 0.489 | 0.494 | 0.497 | 0.5   | 0.503 | 0.506 | 0.51  | 0.516 |
| El Salvador                      | 0.296 | 0.3   | 0.304 | 0.309 | 0.315 | 0.322 | 0.329  | 0.339 | 0.349 | 0.357 | 0.363 | 0.37  | 0.377 | 0.383 | 0.388 | 0.392 | 0.395 | 0.397 | 0.4   | 0.402 |
| Guatemala                        | 0.273 | 0.273 | 0.277 | 0.284 | 0.289 | 0.284 | 0.271  | 0.265 | 0.265 | 0.264 | 0.263 | 0.266 | 0.274 | 0.282 | 0.287 | 0.293 | 0.303 | 0.303 | 0.302 | 0.308 |
| Honduras                         | 0.24  | 0.244 | 0.248 | 0.252 | 0.255 | 0.258 | 0.262  | 0.266 | 0.272 | 0.278 | 0.286 | 0.296 | 0.305 | 0.311 | 0.315 | 0.319 | 0.322 | 0.326 | 0.33  | 0.336 |
| Mexico                           | 0.372 | 0.379 | 0.387 | 0.396 | 0.404 | 0.413 | 0.424  | 0.435 | 0.443 | 0.449 | 0.456 | 0.463 | 0.47  | 0.477 | 0.483 | 0.489 | 0.494 | 0.499 | 0.504 | 0.509 |
| Aguascalientes                   | 0.402 | 0.412 | 0.422 | 0.432 | 0.442 | 0.453 | 0.464  | 0.475 | 0.484 | 0.491 | 0.498 | 0.506 | 0.513 | 0.519 | 0.526 | 0.532 | 0.538 | 0.543 | 0.549 | 0.554 |
| Baja California                  | 0.417 | 0.427 | 0.436 | 0.447 | 0.457 | 0.467 | 0.48   | 0.492 | 0.5   | 0.507 | 0.514 | 0.523 | 0.531 | 0.538 | 0.545 | 0.551 | 0.557 | 0.561 | 0.564 | 0.567 |
| Baja California Sur              | 0.409 | 0.417 | 0.427 | 0.437 | 0.446 | 0.457 | 0.469  | 0.482 | 0.49  | 0.497 | 0.504 | 0.512 | 0.521 | 0.528 | 0.535 | 0.542 | 0.549 | 0.555 | 0.56  | 0.565 |
| Campeche                         | 0.352 | 0.358 | 0.365 | 0.372 | 0.379 | 0.387 | 0.398  | 0.408 | 0.415 | 0.42  | 0.426 | 0.434 | 0.441 | 0.446 | 0.451 | 0.458 | 0.464 | 0.47  | 0.475 | 0.48  |
| Chiapas                          | 0.302 | 0.309 | 0.315 | 0.321 | 0.327 | 0.334 | 0.344  | 0.352 | 0.358 | 0.362 | 0.367 | 0.372 | 0.377 | 0.38  | 0.384 | 0.388 | 0.391 | 0.394 | 0.397 | 0.4   |
| Chihuahua                        | 0.381 | 0.389 | 0.399 | 0.408 | 0.418 | 0.428 | 0.44   | 0.453 | 0.462 | 0.469 | 0.477 | 0.487 | 0.497 | 0.505 | 0.513 | 0.52  | 0.528 | 0.534 | 0.538 | 0.543 |
| Coahuila                         | 0.401 | 0.409 | 0.417 | 0.425 | 0.432 | 0.44  | 0.451  | 0.462 | 0.468 | 0.473 | 0.479 | 0.487 | 0.494 | 0.501 | 0.509 | 0.517 | 0.524 | 0.531 | 0.538 | 0.544 |
| Colima                           | 0.381 | 0.389 | 0.398 | 0.406 | 0.414 | 0.423 | 0.434  | 0.445 | 0.452 | 0.457 | 0.464 | 0.471 | 0.478 | 0.485 | 0.492 | 0.5   | 0.508 | 0.516 | 0.524 | 0.531 |
| Mexico City                      | 0.446 | 0.456 | 0.468 | 0.48  | 0.492 | 0.504 | 0.518  | 0.532 | 0.542 | 0.551 | 0.56  | 0.569 | 0.576 | 0.579 | 0.581 | 0.581 | 0.58  | 0.581 | 0.585 | 0.593 |
| Durango                          | 0.354 | 0.362 | 0.371 | 0.38  | 0.388 | 0.398 | 0.411  | 0.423 | 0.432 | 0.439 | 0.447 | 0.457 | 0.465 | 0.472 | 0.478 | 0.485 | 0.491 | 0.496 | 0.499 | 0.503 |
| Guanajuato                       | 0.34  | 0.348 | 0.356 | 0.364 | 0.372 | 0.381 | 0.391  | 0.401 | 0.408 | 0.413 | 0.419 | 0.424 | 0.43  | 0.436 | 0.442 | 0.451 | 0.459 | 0.468 | 0.477 | 0.486 |
| Guerrero                         | 0.294 | 0.3   | 0.308 | 0.315 | 0.322 | 0.33  | 0.34   | 0.351 | 0.358 | 0.364 | 0.371 | 0.379 | 0.386 | 0.392 | 0.398 | 0.404 | 0.409 | 0.414 | 0.418 | 0.423 |
| Hidalgo                          | 0.282 | 0.289 | 0.296 | 0.304 | 0.313 | 0.321 | 0.333  | 0.344 | 0.35  | 0.355 | 0.36  | 0.364 | 0.368 | 0.371 | 0.374 | 0.38  | 0.386 | 0.394 | 0.402 | 0.41  |
| Jalisco                          | 0.389 | 0.396 | 0.404 | 0.412 | 0.419 | 0.427 | 0.437  | 0.447 | 0.454 | 0.461 | 0.468 | 0.476 | 0.483 | 0.49  | 0.496 | 0.503 | 0.508 | 0.514 | 0.52  | 0.526 |
| México                           | 0.375 | 0.381 | 0.389 | 0.396 | 0.404 | 0.412 | 0.424  | 0.436 | 0.445 | 0.453 | 0.461 | 0.471 | 0.482 | 0.493 | 0.505 | 0.516 | 0.524 | 0.53  | 0.533 | 0.532 |
| Michoacán de Ocampo              | 0.326 | 0.333 | 0.34  | 0.347 | 0.354 | 0.362 | 0.371  | 0.38  | 0.386 | 0.391 | 0.397 | 0.403 | 0.41  | 0.417 | 0.424 | 0.432 | 0.439 | 0.446 | 0.452 | 0.459 |
| Morelos                          | 0.378 | 0.385 | 0.393 | 0.4   | 0.408 | 0.415 | 0.425  | 0.435 | 0.441 | 0.446 | 0.451 | 0.458 | 0.465 | 0.472 | 0.479 | 0.486 | 0.493 | 0.503 | 0.51  | 0.518 |
| Nayarit                          | 0.337 | 0.346 | 0.354 | 0.363 | 0.372 | 0.382 | 0.394  | 0.406 | 0.414 | 0.421 | 0.429 | 0.438 | 0.446 | 0.453 | 0.459 | 0.466 | 0.472 | 0.478 | 0.484 | 0.49  |
| Nuevo León                       | 0.433 | 0.442 | 0.452 | 0.463 | 0.472 | 0.482 | 0.494  | 0.506 | 0.514 | 0.521 | 0.528 | 0.536 | 0.545 | 0.554 | 0.564 | 0.572 | 0.579 | 0.585 | 0.59  | 0.594 |
| Oaxaca                           | 0.292 | 0.299 | 0.305 | 0.312 | 0.318 | 0.326 | 0.335  | 0.345 | 0.352 | 0.357 | 0.364 | 0.372 | 0.38  | 0.387 | 0.393 | 0.4   | 0.407 | 0.413 | 0.419 | 0.425 |
| Puebla                           | 0.314 | 0.322 | 0.33  | 0.338 | 0.346 | 0.355 | 0.368  | 0.38  | 0.387 | 0.392 | 0.398 | 0.403 | 0.408 | 0.416 | 0.422 | 0.425 | 0.426 | 0.432 | 0.441 | 0.449 |
| Querétaro                        | 0.361 | 0.369 | 0.377 | 0.386 | 0.395 | 0.405 | 0.417  | 0.428 | 0.436 | 0.443 | 0.449 | 0.455 | 0.458 | 0.46  | 0.462 | 0.462 | 0.464 | 0.47  | 0.478 | 0.489 |
| Quintana Roo                     | 0.4   | 0.405 | 0.411 | 0.417 | 0.422 | 0.428 | 0.439  | 0.449 | 0.454 | 0.458 | 0.463 | 0.47  | 0.477 | 0.483 | 0.488 | 0.495 | 0.501 | 0.506 | 0.51  | 0.515 |
| San Luis Potosí                  | 0.336 | 0.344 | 0.351 | 0.359 | 0.366 | 0.375 | 0.386  | 0.396 | 0.404 | 0.41  | 0.418 | 0.426 | 0.434 | 0.44  | 0.447 | 0.454 | 0.46  | 0.465 | 0.471 | 0.477 |
| Sinaloa                          | 0.362 | 0.371 | 0.379 | 0.388 | 0.397 | 0.407 | 0.42   | 0.432 | 0.44  | 0.448 | 0.456 | 0.465 | 0.474 | 0.481 | 0.488 | 0.495 | 0.501 | 0.507 | 0.512 | 0.518 |
| Sonora                           | 0.395 | 0.403 | 0.413 | 0.423 | 0.432 | 0.442 | 0.454  | 0.465 | 0.473 | 0.48  | 0.488 | 0.495 | 0.503 | 0.512 | 0.52  | 0.527 | 0.533 | 0.538 | 0.543 | 0.549 |
| Tabasco                          | 0.323 | 0.33  | 0.338 | 0.345 | 0.352 | 0.361 | 0.373  | 0.384 | 0.392 | 0.398 | 0.405 | 0.413 | 0.422 | 0.428 | 0.435 | 0.442 | 0.449 | 0.456 | 0.462 | 0.468 |
| Tamaulipas                       | 0.401 | 0.41  | 0.419 | 0.428 | 0.436 | 0.445 | 0.456  | 0.467 | 0.473 | 0.478 | 0.483 | 0.49  | 0.497 | 0.504 | 0.511 | 0.519 | 0.525 | 0.532 | 0.538 | 0.544 |
| Tlaxcala                         | 0.328 | 0.335 | 0.343 | 0.351 | 0.358 | 0.367 | 0.378  | 0.389 | 0.395 | 0.399 | 0.403 | 0.407 | 0.412 | 0.415 | 0.419 | 0.427 | 0.437 | 0.449 | 0.46  | 0.47  |
| Veracruz de Ignacio de la Llave  | 0.329 | 0.336 | 0.343 | 0.35  | 0.357 | 0.365 | 0.375  | 0.385 | 0.393 | 0.399 | 0.406 | 0.414 | 0.422 | 0.429 | 0.435 | 0.441 | 0.447 | 0.451 | 0.455 | 0.459 |
| Yucatán                          | 0.363 | 0.368 | 0.375 | 0.383 | 0.39  | 0.398 | 0.408  | 0.417 | 0.425 | 0.431 | 0.438 | 0.445 | 0.452 | 0.458 | 0.463 | 0.469 | 0.474 | 0.48  | 0.485 | 0.491 |
| Zacatecas                        | 0.32  | 0.328 | 0.337 | 0.344 | 0.352 | 0.362 | 0.373  | 0.384 | 0.392 | 0.399 | 0.407 | 0.416 | 0.425 | 0.432 | 0.439 | 0.447 | 0.455 | 0.462 | 0.469 | 0.476 |
| Nicaragua                        | 0.264 | 0.27  | 0.274 | 0.277 | 0.279 | 0.282 | 0.285  | 0.287 | 0.29  | 0.292 | 0.297 | 0.303 | 0.309 | 0.316 | 0.323 | 0.33  | 0.337 | 0.343 | 0.348 | 0.352 |
| Panama                           | 0.401 | 0.411 | 0.421 | 0.431 | 0.442 | 0.452 | 0.459  | 0.465 | 0.472 | 0.479 | 0.486 | 0.493 | 0.499 | 0.506 | 0.513 | 0.519 | 0.524 | 0.529 | 0.533 | 0.537 |
| Venezuela                        | 0.432 | 0.441 | 0.45  | 0.453 | 0.456 | 0.461 | 0.468  | 0.477 | 0.483 | 0.489 | 0.496 | 0.503 | 0.51  | 0.519 | 0.528 | 0.529 | 0.528 | 0.53  | 0.535 | 0.533 |
| Tropical Latin America           | 0.361 | 0.367 | 0.373 | 0.38  | 0.387 | 0.393 | 0.4    | 0.407 | 0.413 | 0.42  | 0.426 | 0.432 | 0.438 | 0.444 | 0.45  | 0.457 | 0.465 | 0.472 | 0.48  | 0.487 |
| Brazil                           | 0.361 | 0.367 | 0.373 | 0.38  | 0.387 | 0.393 | 0.4    | 0.407 | 0.413 | 0.42  | 0.427 | 0.433 | 0.439 | 0.444 | 0.451 | 0.457 | 0.465 | 0.472 | 0.48  | 0.487 |
| Acre                             | 0.247 | 0.252 | 0.256 | 0.261 | 0.265 | 0.27  | 0.274  | 0.279 | 0.283 | 0.289 | 0.294 | 0.3   | 0.305 | 0.311 | 0.319 | 0.327 | 0.336 | 0.347 | 0.357 | 0.367 |
| Alagoas                          | 0.213 | 0.216 | 0.221 | 0.227 | 0.232 | 0.238 | 0.243  | 0.249 | 0.255 | 0.262 | 0.269 | 0.276 | 0.283 | 0.291 | 0.3   | 0.309 | 0.319 | 0.329 | 0.338 | 0.347 |
| Amapá                            | 0.322 | 0.327 | 0.332 | 0.338 | 0.343 | 0.349 | 0.356  | 0.362 | 0.369 | 0.377 | 0.384 | 0.392 | 0.399 | 0.406 | 0.414 | 0.422 | 0.431 | 0.44  | 0.45  | 0.459 |
| Amazonas                         | 0.272 | 0.277 | 0.282 | 0.288 | 0.293 | 0.298 | 0.303  | 0.308 | 0.315 | 0.323 | 0.33  | 0.339 | 0.348 | 0.358 | 0.369 | 0.381 | 0.393 | 0.405 | 0.416 | 0.427 |
| Bahia                            | 0.26  | 0.265 | 0.269 | 0.274 | 0.279 | 0.283 | 0.287  | 0.292 | 0.297 | 0.303 | 0.31  | 0.317 | 0.325 | 0.333 | 0.342 | 0.352 | 0.362 | 0.373 | 0.383 | 0.393 |
| Ceará                            | 0.278 | 0.284 | 0.289 | 0.294 | 0.299 | 0.304 | 0.308  | 0.313 | 0.319 | 0.325 | 0.332 | 0.339 | 0.347 | 0.354 | 0.362 | 0.37  | 0.379 | 0.388 | 0.396 | 0.404 |
| Distrito Federal                 | 0.498 | 0.506 | 0.513 | 0.52  | 0.526 | 0.533 | 0.54</ |       |       |       |       |       |       |       |       |       |       |       |       |       |



Appendix Table 9. Socio-Demographic Index values for all estimated GBD 2017 locations, 1970–1989

| Location                     | 1970  | 1971  | 1972  | 1973  | 1974  | 1975  | 1976  | 1977  | 1978  | 1979  | 1980  | 1981  | 1982  | 1983  | 1984  | 1985  | 1986  | 1987  | 1988  | 1989  |
|------------------------------|-------|-------|-------|-------|-------|-------|-------|-------|-------|-------|-------|-------|-------|-------|-------|-------|-------|-------|-------|-------|
| Rio Grande do Sul            | 0.426 | 0.433 | 0.44  | 0.447 | 0.454 | 0.46  | 0.466 | 0.472 | 0.477 | 0.483 | 0.488 | 0.493 | 0.498 | 0.502 | 0.507 | 0.513 | 0.519 | 0.526 | 0.532 | 0.538 |
| Rondônia                     | 0.283 | 0.288 | 0.294 | 0.3   | 0.305 | 0.31  | 0.315 | 0.32  | 0.326 | 0.331 | 0.337 | 0.343 | 0.35  | 0.357 | 0.365 | 0.374 | 0.384 | 0.394 | 0.404 | 0.414 |
| Roraima                      | 0.294 | 0.299 | 0.303 | 0.307 | 0.312 | 0.316 | 0.32  | 0.324 | 0.328 | 0.333 | 0.338 | 0.343 | 0.349 | 0.356 | 0.364 | 0.374 | 0.384 | 0.395 | 0.407 | 0.417 |
| Santa Catarina               | 0.403 | 0.409 | 0.415 | 0.422 | 0.429 | 0.435 | 0.443 | 0.45  | 0.458 | 0.466 | 0.473 | 0.481 | 0.488 | 0.494 | 0.5   | 0.507 | 0.514 | 0.521 | 0.528 | 0.535 |
| São Paulo                    | 0.435 | 0.441 | 0.447 | 0.453 | 0.459 | 0.465 | 0.471 | 0.477 | 0.482 | 0.488 | 0.494 | 0.5   | 0.505 | 0.51  | 0.516 | 0.522 | 0.529 | 0.537 | 0.544 | 0.551 |
| Sergipe                      | 0.274 | 0.28  | 0.286 | 0.293 | 0.3   | 0.307 | 0.314 | 0.321 | 0.328 | 0.336 | 0.343 | 0.351 | 0.358 | 0.365 | 0.373 | 0.381 | 0.39  | 0.399 | 0.408 | 0.417 |
| Tocantins                    | 0.242 | 0.246 | 0.25  | 0.254 | 0.259 | 0.265 | 0.272 | 0.279 | 0.287 | 0.295 | 0.304 | 0.313 | 0.322 | 0.33  | 0.34  | 0.349 | 0.36  | 0.37  | 0.379 | 0.388 |
| Paraguay                     | 0.352 | 0.357 | 0.362 | 0.367 | 0.373 | 0.378 | 0.383 | 0.388 | 0.393 | 0.398 | 0.404 | 0.41  | 0.416 | 0.421 | 0.427 | 0.433 | 0.44  | 0.449 | 0.457 | 0.463 |
| North Africa and Middle East | 0.297 | 0.304 | 0.312 | 0.32  | 0.328 | 0.335 | 0.342 | 0.35  | 0.357 | 0.364 | 0.373 | 0.382 | 0.39  | 0.399 | 0.408 | 0.415 | 0.422 | 0.431 | 0.439 | 0.448 |
| North Africa and Middle East | 0.297 | 0.304 | 0.312 | 0.32  | 0.328 | 0.335 | 0.342 | 0.35  | 0.357 | 0.364 | 0.373 | 0.382 | 0.39  | 0.399 | 0.408 | 0.415 | 0.422 | 0.431 | 0.439 | 0.448 |
| Afghanistan                  | 0.113 | 0.115 | 0.116 | 0.118 | 0.119 | 0.121 | 0.123 | 0.125 | 0.127 | 0.129 | 0.13  | 0.13  | 0.132 | 0.135 | 0.138 | 0.14  | 0.143 | 0.145 | 0.147 | 0.148 |
| Algeria                      | 0.304 | 0.31  | 0.317 | 0.324 | 0.332 | 0.34  | 0.348 | 0.356 | 0.365 | 0.375 | 0.387 | 0.399 | 0.41  | 0.422 | 0.435 | 0.448 | 0.459 | 0.468 | 0.477 | 0.487 |
| Bahrain                      | 0.414 | 0.427 | 0.44  | 0.454 | 0.467 | 0.477 | 0.489 | 0.501 | 0.515 | 0.521 | 0.531 | 0.541 | 0.552 | 0.564 | 0.575 | 0.583 | 0.591 | 0.596 | 0.602 | 0.607 |
| Egypt                        | 0.282 | 0.29  | 0.297 | 0.303 | 0.308 | 0.313 | 0.32  | 0.327 | 0.334 | 0.342 | 0.351 | 0.359 | 0.367 | 0.374 | 0.381 | 0.389 | 0.399 | 0.41  | 0.422 | 0.432 |
| Iran                         | 0.319 | 0.329 | 0.339 | 0.348 | 0.357 | 0.363 | 0.37  | 0.376 | 0.379 | 0.382 | 0.384 | 0.388 | 0.401 | 0.423 | 0.443 | 0.453 | 0.459 | 0.468 | 0.48  | 0.493 |
| Iraq                         | 0.274 | 0.281 | 0.287 | 0.294 | 0.302 | 0.311 | 0.32  | 0.33  | 0.34  | 0.35  | 0.361 | 0.37  | 0.379 | 0.386 | 0.393 | 0.399 | 0.406 | 0.413 | 0.42  | 0.427 |
| Jordan                       | 0.302 | 0.316 | 0.329 | 0.343 | 0.357 | 0.371 | 0.385 | 0.399 | 0.414 | 0.429 | 0.446 | 0.463 | 0.477 | 0.49  | 0.503 | 0.515 | 0.526 | 0.535 | 0.542 | 0.547 |
| Kuwait                       | 0.41  | 0.423 | 0.424 | 0.423 | 0.427 | 0.436 | 0.452 | 0.472 | 0.49  | 0.504 | 0.517 | 0.531 | 0.546 | 0.562 | 0.579 | 0.593 | 0.603 | 0.618 | 0.634 | 0.649 |
| Lebanon                      | 0.295 | 0.307 | 0.32  | 0.332 | 0.351 | 0.363 | 0.372 | 0.383 | 0.383 | 0.395 | 0.407 | 0.419 | 0.429 | 0.439 | 0.452 | 0.466 | 0.48  | 0.494 | 0.505 | 0.512 |
| Libya                        | 0.318 | 0.31  | 0.308 | 0.326 | 0.357 | 0.39  | 0.423 | 0.456 | 0.489 | 0.519 | 0.545 | 0.563 | 0.58  | 0.594 | 0.604 | 0.611 | 0.616 | 0.622 | 0.628 | 0.636 |
| Morocco                      | 0.223 | 0.231 | 0.238 | 0.246 | 0.254 | 0.262 | 0.27  | 0.279 | 0.287 | 0.296 | 0.304 | 0.312 | 0.321 | 0.329 | 0.338 | 0.346 | 0.355 | 0.364 | 0.373 | 0.381 |
| Palestine                    | 0.223 | 0.231 | 0.24  | 0.248 | 0.257 | 0.266 | 0.276 | 0.285 | 0.295 | 0.304 | 0.312 | 0.32  | 0.326 | 0.332 | 0.338 | 0.343 | 0.348 | 0.352 | 0.355 | 0.358 |
| Oman                         | 0.27  | 0.28  | 0.289 | 0.297 | 0.305 | 0.314 | 0.323 | 0.332 | 0.34  | 0.349 | 0.358 | 0.367 | 0.378 | 0.39  | 0.403 | 0.416 | 0.428 | 0.439 | 0.45  | 0.462 |
| Qatar                        | 0.43  | 0.441 | 0.451 | 0.462 | 0.473 | 0.484 | 0.495 | 0.506 | 0.517 | 0.527 | 0.534 | 0.54  | 0.545 | 0.548 | 0.551 | 0.556 | 0.563 | 0.571 | 0.58  | 0.591 |
| Saudi Arabia                 | 0.226 | 0.232 | 0.238 | 0.245 | 0.251 | 0.257 | 0.261 | 0.266 | 0.271 | 0.276 | 0.28  | 0.285 | 0.292 | 0.303 | 0.318 | 0.334 | 0.352 | 0.371 | 0.393 | 0.415 |
| Sudan                        | 0.133 | 0.135 | 0.138 | 0.141 | 0.145 | 0.149 | 0.154 | 0.16  | 0.165 | 0.17  | 0.174 | 0.179 | 0.184 | 0.188 | 0.192 | 0.197 | 0.201 | 0.205 | 0.21  | 0.215 |
| Syria                        | 0.247 | 0.248 | 0.251 | 0.254 | 0.257 | 0.262 | 0.269 | 0.278 | 0.288 | 0.298 | 0.307 | 0.317 | 0.327 | 0.337 | 0.344 | 0.352 | 0.359 | 0.368 | 0.376 | 0.383 |
| Tunisia                      | 0.26  | 0.268 | 0.277 | 0.285 | 0.293 | 0.302 | 0.311 | 0.321 | 0.332 | 0.342 | 0.352 | 0.361 | 0.369 | 0.379 | 0.391 | 0.403 | 0.413 | 0.423 | 0.433 | 0.443 |
| Turkey                       | 0.349 | 0.355 | 0.362 | 0.369 | 0.377 | 0.385 | 0.393 | 0.402 | 0.411 | 0.419 | 0.426 | 0.434 | 0.441 | 0.448 | 0.455 | 0.462 | 0.47  | 0.479 | 0.489 | 0.498 |
| United Arab Emirates         | 0.333 | 0.332 | 0.338 | 0.354 | 0.375 | 0.396 | 0.412 | 0.427 | 0.445 | 0.462 | 0.475 | 0.484 | 0.497 | 0.516 | 0.535 | 0.549 | 0.561 | 0.574 | 0.589 | 0.605 |
| Yemen                        | 0.12  | 0.124 | 0.128 | 0.132 | 0.136 | 0.139 | 0.142 | 0.146 | 0.149 | 0.154 | 0.158 | 0.162 | 0.167 | 0.174 | 0.181 | 0.187 | 0.191 | 0.194 | 0.197 | 0.199 |
| South Asia                   | 0.219 | 0.223 | 0.227 | 0.232 | 0.238 | 0.244 | 0.249 | 0.254 | 0.259 | 0.264 | 0.267 | 0.269 | 0.272 | 0.277 | 0.281 | 0.286 | 0.292 | 0.298 | 0.303 | 0.308 |
| South Asia                   | 0.219 | 0.223 | 0.227 | 0.232 | 0.238 | 0.244 | 0.249 | 0.254 | 0.259 | 0.264 | 0.267 | 0.269 | 0.272 | 0.277 | 0.281 | 0.286 | 0.292 | 0.298 | 0.303 | 0.308 |
| Bangladesh                   | 0.084 | 0.116 | 0.138 | 0.153 | 0.166 | 0.177 | 0.187 | 0.195 | 0.202 | 0.207 | 0.211 | 0.215 | 0.219 | 0.222 | 0.225 | 0.228 | 0.231 | 0.236 | 0.241 | 0.248 |
| Bhutan                       | 0.202 | 0.208 | 0.212 | 0.217 | 0.221 | 0.225 | 0.229 | 0.234 | 0.238 | 0.243 | 0.248 | 0.254 | 0.26  | 0.267 | 0.274 | 0.281 | 0.289 | 0.297 | 0.306 | 0.315 |
| India                        | 0.225 | 0.23  | 0.233 | 0.238 | 0.245 | 0.251 | 0.255 | 0.26  | 0.265 | 0.27  | 0.273 | 0.275 | 0.278 | 0.283 | 0.287 | 0.293 | 0.299 | 0.306 | 0.311 | 0.316 |
| Andhra Pradesh               | 0.162 | 0.166 | 0.169 | 0.174 | 0.183 | 0.191 | 0.195 | 0.198 | 0.203 | 0.208 | 0.213 | 0.219 | 0.225 | 0.233 | 0.24  | 0.248 | 0.255 | 0.262 | 0.268 | 0.274 |
| Arunachal Pradesh            | 0.185 | 0.19  | 0.196 | 0.202 | 0.209 | 0.214 | 0.216 | 0.221 | 0.228 | 0.234 | 0.236 | 0.24  | 0.247 | 0.254 | 0.261 | 0.269 | 0.279 | 0.288 | 0.298 | 0.305 |
| Assam                        | 0.223 | 0.228 | 0.231 | 0.235 | 0.241 | 0.245 | 0.248 | 0.25  | 0.255 | 0.259 | 0.261 | 0.264 | 0.269 | 0.276 | 0.283 | 0.289 | 0.296 | 0.306 | 0.314 | 0.321 |
| Bihar                        | 0.197 | 0.201 | 0.205 | 0.21  | 0.215 | 0.221 | 0.226 | 0.231 | 0.237 | 0.242 | 0.244 | 0.245 | 0.248 | 0.252 | 0.258 | 0.264 | 0.271 | 0.277 | 0.282 | 0.287 |
| Chhattisgarh                 | 0.202 | 0.207 | 0.211 | 0.216 | 0.224 | 0.232 | 0.238 | 0.243 | 0.249 | 0.254 | 0.258 | 0.261 | 0.264 | 0.268 | 0.272 | 0.276 | 0.282 | 0.286 | 0.288 | 0.29  |
| Delhi                        | 0.391 | 0.397 | 0.407 | 0.416 | 0.424 | 0.431 | 0.437 | 0.442 | 0.447 | 0.45  | 0.45  | 0.449 | 0.453 | 0.456 | 0.459 | 0.462 | 0.466 | 0.472 | 0.478 | 0.483 |
| Goa                          | 0.366 | 0.373 | 0.38  | 0.387 | 0.394 | 0.402 | 0.41  | 0.417 | 0.425 | 0.431 | 0.436 | 0.44  | 0.447 | 0.452 | 0.459 | 0.464 | 0.471 | 0.478 | 0.486 | 0.493 |
| Gujarat                      | 0.244 | 0.249 | 0.255 | 0.262 | 0.268 | 0.272 | 0.276 | 0.283 | 0.29  | 0.296 | 0.297 | 0.297 | 0.3   | 0.304 | 0.305 | 0.307 | 0.315 | 0.326 | 0.338 | 0.345 |
| Haryana                      | 0.243 | 0.248 | 0.253 | 0.26  | 0.269 | 0.277 | 0.283 | 0.288 | 0.293 | 0.297 | 0.299 | 0.299 | 0.302 | 0.305 | 0.307 | 0.311 | 0.316 | 0.323 | 0.332 | 0.337 |
| Himachal Pradesh             | 0.213 | 0.218 | 0.224 | 0.23  | 0.238 | 0.245 | 0.251 | 0.259 | 0.267 | 0.275 | 0.279 | 0.283 | 0.287 | 0.291 | 0.296 | 0.302 | 0.31  | 0.317 | 0.326 | 0.333 |
| Jammu and Kashmir            | 0.234 | 0.239 | 0.245 | 0.251 | 0.258 | 0.265 | 0.272 | 0.279 | 0.284 | 0.289 | 0.294 | 0.297 | 0.301 | 0.304 | 0.307 | 0.313 | 0.319 | 0.324 | 0.329 | 0.332 |
| Jharkhand                    | 0.205 | 0.21  | 0.213 | 0.219 | 0.226 | 0.233 | 0.238 | 0.243 | 0.249 | 0.253 | 0.256 | 0.258 | 0.26  | 0.262 | 0.265 | 0.269 | 0.272 | 0.275 | 0.278 | 0.279 |
| Karnataka                    | 0.22  | 0.223 | 0.226 | 0.231 | 0.237 | 0.242 | 0.245 | 0.249 | 0.253 | 0.257 | 0.259 | 0.261 | 0.266 | 0.271 | 0.277 | 0.283 | 0.291 | 0.3   | 0.309 | 0.316 |
| Kerala                       | 0.318 | 0.323 | 0.328 | 0.332 | 0.337 | 0.344 | 0.349 | 0.354 | 0.357 | 0.36  | 0.363 | 0.364 | 0.366 | 0.369 | 0.373 | 0.378 | 0.385 | 0.391 | 0.397 | 0.402 |
| Madhya Pradesh               | 0.175 | 0.178 | 0.18  | 0.185 | 0.192 | 0.198 | 0.202 | 0.207 | 0.214 | 0.22  | 0.224 | 0.226 | 0.232 | 0.239 | 0.246 | 0.254 | 0.261 | 0.269 | 0.275 | 0.279 |
| Maharashtra                  | 0.258 | 0.262 | 0.266 | 0.272 | 0.279 | 0.284 | 0.288 | 0.292 | 0.298 | 0.303 | 0.305 | 0.306 | 0.309 | 0.314 | 0.318 | 0.323 | 0.33  | 0.34  | 0.349 | 0.357 |
| Manipur                      | 0.251 | 0.257 | 0.261 | 0.267 | 0.274 | 0.282 | 0.288 | 0.294 | 0.3   | 0.306 | 0.311 | 0.316 | 0.321 | 0.328 | 0.334 | 0.341 | 0.348 | 0.358 | 0.367 | 0.374 |
| Meghalaya                    | 0.229 | 0.234 | 0.239 | 0.244 | 0.25  | 0.256 | 0.259 | 0.263 | 0.268 | 0.272 | 0.276 | 0.279 | 0.283 | 0.288 | 0.293 | 0.299 | 0.304 | 0.314 | 0.32  | 0.327 |
| Mizoram                      | 0.27  | 0.275 | 0.28  | 0.284 | 0.29  | 0.297 | 0.303 | 0.307 | 0.313 | 0.318 | 0.322 | 0.325 | 0.329 | 0.333 | 0.34  | 0.351 | 0.363 | 0.376 | 0.384 | 0.389 |
| Nagaland                     | 0.283 | 0.287 | 0.291 | 0.295 | 0.301 | 0.307 | 0.312 | 0.316 | 0.321 | 0.325 | 0.329 | 0.333 | 0.339 | 0.345 | 0.351 | 0.358 | 0.366 | 0.375 | 0.383 | 0.39  |
| Odisha                       | 0.19  | 0.194 | 0.197 | 0.201 | 0.207 | 0.214 | 0.218 | 0.223 | 0.227 | 0.232 | 0.236 | 0.239 | 0.242 | 0.247 | 0.251 | 0.258 | 0.266 | 0.27  | 0.276 | 0.28  |
| Punjab                       | 0.294 | 0.299 | 0.303 | 0.308 | 0.313 | 0.318 | 0.324 |       |       |       |       |       |       |       |       |       |       |       |       |       |



Appendix Table 9. Socio-Demographic Index values for all estimated GBD 2017 locations, 1970–1989

| Location                       | 1970  | 1971  | 1972  | 1973  | 1974  | 1975  | 1976  | 1977  | 1978  | 1979  | 1980  | 1981  | 1982  | 1983  | 1984  | 1985  | 1986  | 1987  | 1988  | 1989  |
|--------------------------------|-------|-------|-------|-------|-------|-------|-------|-------|-------|-------|-------|-------|-------|-------|-------|-------|-------|-------|-------|-------|
| China                          | 0.269 | 0.28  | 0.292 | 0.305 | 0.318 | 0.33  | 0.339 | 0.347 | 0.355 | 0.362 | 0.37  | 0.377 | 0.38  | 0.383 | 0.389 | 0.396 | 0.404 | 0.417 | 0.431 | 0.443 |
| North Korea                    | 0.398 | 0.411 | 0.421 | 0.431 | 0.44  | 0.448 | 0.453 | 0.458 | 0.462 | 0.466 | 0.47  | 0.474 | 0.478 | 0.482 | 0.486 | 0.49  | 0.494 | 0.498 | 0.503 | 0.507 |
| Taiwan (Province of China)     | 0.485 | 0.497 | 0.51  | 0.52  | 0.53  | 0.53  | 0.535 | 0.548 | 0.555 | 0.566 | 0.577 | 0.588 | 0.601 | 0.613 | 0.627 | 0.643 | 0.655 | 0.663 | 0.672 | 0.682 |
| Oceania                        | 0.329 | 0.333 | 0.338 | 0.343 | 0.349 | 0.353 | 0.358 | 0.362 | 0.366 | 0.37  | 0.374 | 0.377 | 0.38  | 0.384 | 0.387 | 0.39  | 0.393 | 0.397 | 0.4   | 0.403 |
| American Samoa                 | 0.537 | 0.546 | 0.557 | 0.567 | 0.575 | 0.58  | 0.586 | 0.59  | 0.595 | 0.599 | 0.6   | 0.6   | 0.599 | 0.597 | 0.597 | 0.597 | 0.599 | 0.601 | 0.604 | 0.607 |
| Federated States of Micronesia | 0.325 | 0.331 | 0.337 | 0.344 | 0.351 | 0.358 | 0.365 | 0.373 | 0.38  | 0.387 | 0.395 | 0.402 | 0.408 | 0.415 | 0.422 | 0.429 | 0.436 | 0.443 | 0.449 | 0.456 |
| Fiji                           | 0.416 | 0.424 | 0.433 | 0.444 | 0.454 | 0.463 | 0.471 | 0.477 | 0.483 | 0.488 | 0.491 | 0.495 | 0.499 | 0.503 | 0.507 | 0.511 | 0.516 | 0.52  | 0.525 | 0.529 |
| Guam                           | 0.589 | 0.586 | 0.592 | 0.609 | 0.631 | 0.651 | 0.669 | 0.684 | 0.695 | 0.703 | 0.707 | 0.708 | 0.709 | 0.71  | 0.71  | 0.71  | 0.71  | 0.708 | 0.706 | 0.702 |
| Kiribati                       | 0.31  | 0.314 | 0.318 | 0.323 | 0.332 | 0.34  | 0.345 | 0.348 | 0.352 | 0.354 | 0.354 | 0.354 | 0.353 | 0.352 | 0.352 | 0.351 | 0.351 | 0.351 | 0.352 | 0.354 |
| Marshall Islands               | 0.269 | 0.271 | 0.273 | 0.279 | 0.287 | 0.296 | 0.303 | 0.31  | 0.318 | 0.328 | 0.337 | 0.345 | 0.35  | 0.355 | 0.361 | 0.366 | 0.375 | 0.384 | 0.394 | 0.403 |
| Northern Mariana Islands       | 0.585 | 0.591 | 0.598 | 0.605 | 0.613 | 0.622 | 0.63  | 0.639 | 0.648 | 0.656 | 0.664 | 0.671 | 0.678 | 0.686 | 0.695 | 0.704 | 0.713 | 0.721 | 0.728 | 0.734 |
| Papua New Guinea               | 0.255 | 0.259 | 0.264 | 0.268 | 0.272 | 0.276 | 0.279 | 0.282 | 0.285 | 0.288 | 0.29  | 0.293 | 0.295 | 0.298 | 0.3   | 0.303 | 0.306 | 0.309 | 0.312 | 0.315 |
| Samoa                          | 0.411 | 0.422 | 0.431 | 0.442 | 0.451 | 0.458 | 0.467 | 0.475 | 0.483 | 0.492 | 0.499 | 0.503 | 0.507 | 0.51  | 0.514 | 0.518 | 0.522 | 0.527 | 0.531 | 0.535 |
| Solomon Islands                | 0.241 | 0.244 | 0.247 | 0.25  | 0.254 | 0.258 | 0.262 | 0.266 | 0.271 | 0.277 | 0.282 | 0.286 | 0.29  | 0.294 | 0.297 | 0.3   | 0.303 | 0.306 | 0.309 | 0.312 |
| Tonga                          | 0.376 | 0.38  | 0.384 | 0.388 | 0.392 | 0.397 | 0.402 | 0.408 | 0.414 | 0.42  | 0.428 | 0.436 | 0.446 | 0.455 | 0.469 | 0.481 | 0.492 | 0.502 | 0.51  | 0.517 |
| Vanuatu                        | 0.292 | 0.296 | 0.3   | 0.305 | 0.313 | 0.32  | 0.326 | 0.331 | 0.337 | 0.342 | 0.346 | 0.35  | 0.353 | 0.357 | 0.361 | 0.365 | 0.369 | 0.372 | 0.374 | 0.377 |
| Southeast Asia                 | 0.316 | 0.323 | 0.329 | 0.336 | 0.343 | 0.351 | 0.359 | 0.367 | 0.374 | 0.382 | 0.39  | 0.398 | 0.406 | 0.414 | 0.422 | 0.43  | 0.437 | 0.444 | 0.451 | 0.459 |
| Cambodia                       | 0.211 | 0.213 | 0.214 | 0.214 | 0.214 | 0.214 | 0.214 | 0.213 | 0.212 | 0.212 | 0.213 | 0.216 | 0.218 | 0.222 | 0.226 | 0.23  | 0.235 | 0.24  | 0.246 | 0.253 |
| Indonesia                      | 0.28  | 0.287 | 0.294 | 0.303 | 0.312 | 0.321 | 0.33  | 0.339 | 0.347 | 0.357 | 0.366 | 0.376 | 0.385 | 0.395 | 0.405 | 0.414 | 0.424 | 0.433 | 0.443 | 0.454 |
| Laos                           | 0.201 | 0.204 | 0.207 | 0.211 | 0.215 | 0.219 | 0.223 | 0.227 | 0.231 | 0.235 | 0.24  | 0.246 | 0.253 | 0.259 | 0.266 | 0.273 | 0.28  | 0.287 | 0.293 | 0.3   |
| Malaysia                       | 0.412 | 0.421 | 0.427 | 0.43  | 0.439 | 0.453 | 0.468 | 0.48  | 0.489 | 0.496 | 0.503 | 0.51  | 0.52  | 0.527 | 0.535 | 0.543 | 0.548 | 0.551 | 0.559 | 0.563 |
| Maldives                       | 0.237 | 0.241 | 0.245 | 0.249 | 0.254 | 0.259 | 0.264 | 0.269 | 0.273 | 0.278 | 0.285 | 0.292 | 0.3   | 0.306 | 0.314 | 0.325 | 0.337 | 0.349 | 0.361 | 0.375 |
| Mauritius                      | 0.391 | 0.401 | 0.41  | 0.416 | 0.42  | 0.426 | 0.436 | 0.446 | 0.456 | 0.467 | 0.481 | 0.495 | 0.507 | 0.517 | 0.525 | 0.532 | 0.538 | 0.542 | 0.544 | 0.547 |
| Myanmar                        | 0.195 | 0.206 | 0.215 | 0.223 | 0.23  | 0.238 | 0.245 | 0.251 | 0.258 | 0.264 | 0.271 | 0.277 | 0.284 | 0.292 | 0.3   | 0.307 | 0.314 | 0.319 | 0.323 | 0.326 |
| Philippines                    | 0.417 | 0.421 | 0.425 | 0.43  | 0.433 | 0.437 | 0.442 | 0.449 | 0.455 | 0.463 | 0.47  | 0.477 | 0.484 | 0.49  | 0.494 | 0.497 | 0.498 | 0.5   | 0.502 | 0.505 |
| Sri Lanka                      | 0.385 | 0.393 | 0.399 | 0.401 | 0.405 | 0.41  | 0.415 | 0.418 | 0.422 | 0.425 | 0.429 | 0.433 | 0.439 | 0.444 | 0.45  | 0.456 | 0.462 | 0.469 | 0.477 | 0.484 |
| Seychelles                     | 0.358 | 0.365 | 0.372 | 0.38  | 0.389 | 0.399 | 0.409 | 0.42  | 0.432 | 0.445 | 0.457 | 0.469 | 0.479 | 0.488 | 0.497 | 0.507 | 0.516 | 0.524 | 0.533 | 0.541 |
| Thailand                       | 0.346 | 0.355 | 0.363 | 0.371 | 0.379 | 0.387 | 0.395 | 0.403 | 0.409 | 0.413 | 0.42  | 0.429 | 0.437 | 0.444 | 0.454 | 0.464 | 0.473 | 0.48  | 0.485 | 0.492 |
| Timor-Leste                    | 0.167 | 0.174 | 0.18  | 0.186 | 0.193 | 0.199 | 0.206 | 0.212 | 0.218 | 0.225 | 0.23  | 0.234 | 0.239 | 0.243 | 0.247 | 0.252 | 0.258 | 0.263 | 0.267 | 0.272 |
| Vietnam                        | 0.284 | 0.288 | 0.292 | 0.297 | 0.301 | 0.306 | 0.312 | 0.319 | 0.326 | 0.333 | 0.339 | 0.347 | 0.354 | 0.361 | 0.369 | 0.375 | 0.38  | 0.388 | 0.394 | 0.4   |
| Sub-Saharan Africa             | 0.212 | 0.216 | 0.22  | 0.225 | 0.23  | 0.235 | 0.24  | 0.245 | 0.25  | 0.255 | 0.26  | 0.265 | 0.27  | 0.275 | 0.28  | 0.284 | 0.288 | 0.292 | 0.296 | 0.3   |
| Central sub-Saharan Africa     | 0.182 | 0.187 | 0.192 | 0.198 | 0.204 | 0.209 | 0.215 | 0.221 | 0.226 | 0.232 | 0.238 | 0.244 | 0.25  | 0.256 | 0.262 | 0.269 | 0.275 | 0.281 | 0.287 | 0.293 |
| Angola                         | 0.127 | 0.132 | 0.137 | 0.142 | 0.148 | 0.154 | 0.16  | 0.166 | 0.172 | 0.178 | 0.184 | 0.19  | 0.196 | 0.2   | 0.205 | 0.21  | 0.214 | 0.22  | 0.225 | 0.23  |
| Central African Republic       | 0.153 | 0.156 | 0.159 | 0.162 | 0.163 | 0.167 | 0.171 | 0.175 | 0.178 | 0.18  | 0.183 | 0.187 | 0.189 | 0.192 | 0.194 | 0.198 | 0.201 | 0.205 | 0.21  | 0.215 |
| Congo (Brazzaville)            | 0.221 | 0.227 | 0.232 | 0.239 | 0.245 | 0.251 | 0.258 | 0.264 | 0.271 | 0.278 | 0.286 | 0.296 | 0.306 | 0.316 | 0.326 | 0.336 | 0.346 | 0.354 | 0.364 | 0.373 |
| DR Congo                       | 0.182 | 0.187 | 0.192 | 0.198 | 0.204 | 0.209 | 0.213 | 0.218 | 0.223 | 0.229 | 0.234 | 0.24  | 0.246 | 0.251 | 0.258 | 0.265 | 0.271 | 0.277 | 0.283 | 0.289 |
| Equatorial Guinea              | 0.049 | 0.05  | 0.05  | 0.054 | 0.071 | 0.083 | 0.094 | 0.106 | 0.117 | 0.128 | 0.137 | 0.146 | 0.154 | 0.162 | 0.168 | 0.174 | 0.179 | 0.184 | 0.189 | 0.195 |
| Gabon                          | 0.252 | 0.26  | 0.269 | 0.275 | 0.283 | 0.292 | 0.304 | 0.314 | 0.322 | 0.329 | 0.338 | 0.348 | 0.357 | 0.365 | 0.374 | 0.383 | 0.392 | 0.402 | 0.412 | 0.422 |
| Eastern sub-Saharan Africa     | 0.155 | 0.158 | 0.161 | 0.164 | 0.166 | 0.169 | 0.173 | 0.176 | 0.18  | 0.183 | 0.187 | 0.192 | 0.196 | 0.2   | 0.205 | 0.209 | 0.213 | 0.217 | 0.222 | 0.226 |
| Burundi                        | 0.145 | 0.146 | 0.149 | 0.153 | 0.157 | 0.161 | 0.165 | 0.171 | 0.176 | 0.182 | 0.188 | 0.194 | 0.2   | 0.206 | 0.212 | 0.218 | 0.225 | 0.231 | 0.236 | 0.242 |
| Comoros                        | 0.157 | 0.161 | 0.165 | 0.171 | 0.176 | 0.18  | 0.184 | 0.187 | 0.191 | 0.196 | 0.201 | 0.207 | 0.212 | 0.217 | 0.221 | 0.227 | 0.237 | 0.247 | 0.256 | 0.265 |
| Djibouti                       | 0.198 | 0.202 | 0.206 | 0.208 | 0.21  | 0.215 | 0.222 | 0.229 | 0.238 | 0.245 | 0.25  | 0.256 | 0.262 | 0.267 | 0.272 | 0.28  | 0.288 | 0.296 | 0.303 | 0.308 |
| Eritrea                        | 0.116 | 0.12  | 0.124 | 0.128 | 0.133 | 0.136 | 0.14  | 0.145 | 0.149 | 0.153 | 0.158 | 0.162 | 0.166 | 0.17  | 0.174 | 0.178 | 0.183 | 0.187 | 0.192 | 0.197 |
| Ethiopia                       | 0.088 | 0.089 | 0.091 | 0.092 | 0.092 | 0.094 | 0.096 | 0.097 | 0.098 | 0.1   | 0.103 | 0.106 | 0.11  | 0.113 | 0.116 | 0.119 | 0.123 | 0.127 | 0.131 | 0.134 |
| Kenya                          | 0.201 | 0.206 | 0.205 | 0.207 | 0.213 | 0.221 | 0.228 | 0.231 | 0.235 | 0.239 | 0.246 | 0.255 | 0.264 | 0.272 | 0.279 | 0.287 | 0.297 | 0.309 | 0.321 | 0.331 |
| Baringo                        | 0.155 | 0.154 | 0.14  | 0.124 | 0.12  | 0.131 | 0.135 | 0.127 | 0.111 | 0.093 | 0.09  | 0.109 | 0.125 | 0.139 | 0.151 | 0.164 | 0.183 | 0.206 | 0.227 | 0.242 |
| Bomet                          | 0.15  | 0.154 | 0.144 | 0.138 | 0.145 | 0.16  | 0.167 | 0.168 | 0.167 | 0.168 | 0.174 | 0.189 | 0.204 | 0.216 | 0.226 | 0.235 | 0.248 | 0.265 | 0.281 | 0.295 |
| Bungoma                        | 0.181 | 0.184 | 0.179 | 0.176 | 0.181 | 0.192 | 0.2   | 0.204 | 0.207 | 0.213 | 0.22  | 0.23  | 0.239 | 0.247 | 0.253 | 0.259 | 0.268 | 0.281 | 0.294 | 0.306 |
| Busia                          | 0.19  | 0.197 | 0.195 | 0.195 | 0.201 | 0.21  | 0.216 | 0.218 | 0.22  | 0.222 | 0.227 | 0.234 | 0.239 | 0.244 | 0.247 | 0.251 | 0.258 | 0.269 | 0.28  | 0.289 |
| Elgeyo Marakwet                | 0.162 | 0.166 | 0.164 | 0.164 | 0.17  | 0.179 | 0.185 | 0.187 | 0.187 | 0.189 | 0.193 | 0.201 | 0.21  | 0.218 | 0.226 | 0.233 | 0.244 | 0.257 | 0.27  | 0.282 |
| Embu                           | 0.209 | 0.214 | 0.215 | 0.219 | 0.227 | 0.236 | 0.243 | 0.248 | 0.255 | 0.263 | 0.272 | 0.282 | 0.293 | 0.303 | 0.312 | 0.321 | 0.332 | 0.344 | 0.355 | 0.366 |
| Garissa                        | 0.09  | 0.093 | 0.091 | 0.091 | 0.093 | 0.096 | 0.098 | 0.098 | 0.097 | 0.098 | 0.1   | 0.103 | 0.106 | 0.109 | 0.111 | 0.114 | 0.119 | 0.127 | 0.137 | 0.145 |
| Homa Bay                       | 0.148 | 0.153 | 0.148 | 0.145 | 0.151 | 0.162 | 0.169 | 0.168 | 0.164 | 0.161 | 0.16  | 0.163 | 0.165 | 0.164 | 0.162 | 0.16  | 0.165 | 0.178 | 0.193 | 0.205 |
| Isiolo                         | 0.188 | 0.192 | 0.192 | 0.193 | 0.197 | 0.203 | 0.207 | 0.208 | 0.21  | 0.213 | 0.216 | 0.22  | 0.224 | 0.227 | 0.229 | 0.232 | 0.237 | 0.244 | 0.251 | 0.258 |
| Kajiado                        | 0.251 | 0.256 | 0.258 | 0.262 | 0.269 | 0.278 | 0.285 | 0.29  | 0.295 | 0.3   | 0.307 | 0.315 | 0.322 | 0.329 | 0.335 | 0.341 | 0.35  | 0.359 | 0.368 | 0.377 |
| Kakamega                       | 0.187 | 0.192 | 0.188 | 0.187 | 0.192 | 0.2   | 0.206 | 0.206 | 0.206 | 0.208 | 0.213 | 0.221 | 0.228 | 0.233 | 0.237 | 0.242 | 0.25  | 0.262 | 0.275 | 0.286 |
| Kericho                        | 0.148 | 0.149 | 0.137 | 0.128 | 0.129 | 0.136 | 0.136 | 0.125 | 0.108 | 0.094 | 0.096 | 0.119 | 0.138 | 0.152 | 0.165 | 0.178 | 0.197 | 0.218 | 0.238 | 0.254 |
| Kiambu                         | 0.256 | 0.263 | 0.264 | 0.268 | 0.276 | 0.286 | 0.294 | 0.3   | 0.306 |       |       |       |       |       |       |       |       |       |       |       |

**Appendix Table 9. Socio-Demographic Index values for all estimated GBD 2017 locations, 1970–1989**

| Location                    | 1970  | 1971  | 1972  | 1973  | 1974  | 1975  | 1976  | 1977  | 1978  | 1979  | 1980  | 1981  | 1982  | 1983  | 1984  | 1985  | 1986  | 1987  | 1988  | 1989  |
|-----------------------------|-------|-------|-------|-------|-------|-------|-------|-------|-------|-------|-------|-------|-------|-------|-------|-------|-------|-------|-------|-------|
| Migori                      | 0.151 | 0.154 | 0.148 | 0.145 | 0.151 | 0.161 | 0.167 | 0.166 | 0.163 | 0.161 | 0.162 | 0.168 | 0.173 | 0.175 | 0.175 | 0.177 | 0.184 | 0.197 | 0.21  | 0.221 |
| Mombasa                     | 0.225 | 0.233 | 0.238 | 0.245 | 0.254 | 0.264 | 0.272 | 0.28  | 0.288 | 0.297 | 0.306 | 0.316 | 0.324 | 0.332 | 0.34  | 0.348 | 0.357 | 0.367 | 0.377 | 0.387 |
| Murang'a                    | 0.231 | 0.236 | 0.235 | 0.237 | 0.243 | 0.252 | 0.258 | 0.262 | 0.267 | 0.273 | 0.282 | 0.294 | 0.304 | 0.313 | 0.321 | 0.33  | 0.34  | 0.351 | 0.363 | 0.373 |
| Nairobi                     | 0.315 | 0.325 | 0.332 | 0.34  | 0.351 | 0.363 | 0.374 | 0.384 | 0.393 | 0.403 | 0.413 | 0.423 | 0.432 | 0.44  | 0.448 | 0.455 | 0.463 | 0.473 | 0.482 | 0.491 |
| Nakuru                      | 0.184 | 0.189 | 0.191 | 0.194 | 0.2   | 0.209 | 0.215 | 0.219 | 0.223 | 0.227 | 0.234 | 0.242 | 0.251 | 0.259 | 0.267 | 0.276 | 0.286 | 0.3   | 0.313 | 0.326 |
| Nandi                       | 0.179 | 0.181 | 0.172 | 0.166 | 0.168 | 0.177 | 0.182 | 0.181 | 0.179 | 0.178 | 0.184 | 0.196 | 0.21  | 0.224 | 0.236 | 0.249 | 0.264 | 0.281 | 0.297 | 0.311 |
| Narok                       | 0.093 | 0.086 | 0.061 | 0.062 | 0.063 | 0.064 | 0.065 | 0.066 | 0.067 | 0.068 | 0.069 | 0.07  | 0.071 | 0.072 | 0.101 | 0.121 | 0.144 | 0.169 | 0.191 | 0.206 |
| Nyamira                     | 0.195 | 0.202 | 0.204 | 0.207 | 0.216 | 0.228 | 0.238 | 0.245 | 0.251 | 0.257 | 0.266 | 0.275 | 0.285 | 0.293 | 0.301 | 0.308 | 0.318 | 0.329 | 0.341 | 0.351 |
| Nyandarua                   | 0.184 | 0.193 | 0.193 | 0.195 | 0.201 | 0.211 | 0.218 | 0.22  | 0.222 | 0.227 | 0.235 | 0.247 | 0.26  | 0.272 | 0.283 | 0.293 | 0.305 | 0.319 | 0.332 | 0.344 |
| Nyeri                       | 0.229 | 0.238 | 0.242 | 0.247 | 0.256 | 0.267 | 0.275 | 0.282 | 0.288 | 0.295 | 0.304 | 0.315 | 0.326 | 0.337 | 0.346 | 0.355 | 0.366 | 0.377 | 0.388 | 0.398 |
| Samburu                     | 0.126 | 0.128 | 0.122 | 0.117 | 0.12  | 0.127 | 0.13  | 0.128 | 0.124 | 0.12  | 0.122 | 0.13  | 0.139 | 0.146 | 0.152 | 0.158 | 0.167 | 0.179 | 0.19  | 0.199 |
| Siaya                       | 0.112 | 0.117 | 0.117 | 0.118 | 0.123 | 0.131 | 0.137 | 0.14  | 0.142 | 0.145 | 0.15  | 0.156 | 0.162 | 0.167 | 0.172 | 0.177 | 0.185 | 0.196 | 0.208 | 0.218 |
| Taita Taveta                | 0.199 | 0.205 | 0.207 | 0.211 | 0.218 | 0.226 | 0.233 | 0.239 | 0.245 | 0.251 | 0.259 | 0.268 | 0.276 | 0.284 | 0.292 | 0.3   | 0.309 | 0.32  | 0.331 | 0.342 |
| Tana River                  | 0.116 | 0.122 | 0.124 | 0.128 | 0.134 | 0.143 | 0.149 | 0.154 | 0.158 | 0.163 | 0.169 | 0.177 | 0.183 | 0.188 | 0.192 | 0.196 | 0.202 | 0.209 | 0.217 | 0.224 |
| Tharaka Nithi               | 0.193 | 0.201 | 0.207 | 0.213 | 0.221 | 0.23  | 0.238 | 0.244 | 0.251 | 0.259 | 0.266 | 0.274 | 0.281 | 0.288 | 0.294 | 0.301 | 0.309 | 0.317 | 0.326 | 0.334 |
| Trans Nzoia                 | 0.195 | 0.198 | 0.194 | 0.192 | 0.196 | 0.204 | 0.208 | 0.207 | 0.204 | 0.203 | 0.206 | 0.215 | 0.224 | 0.233 | 0.242 | 0.252 | 0.265 | 0.28  | 0.295 | 0.308 |
| Turkana                     | 0.16  | 0.162 | 0.161 | 0.161 | 0.164 | 0.168 | 0.17  | 0.171 | 0.17  | 0.171 | 0.172 | 0.176 | 0.179 | 0.182 | 0.185 | 0.187 | 0.191 | 0.196 | 0.202 | 0.206 |
| Uasin Gishu                 | 0.203 | 0.207 | 0.204 | 0.203 | 0.209 | 0.219 | 0.226 | 0.228 | 0.23  | 0.232 | 0.239 | 0.25  | 0.263 | 0.275 | 0.286 | 0.296 | 0.309 | 0.324 | 0.339 | 0.352 |
| Vihiga                      | 0.206 | 0.211 | 0.21  | 0.212 | 0.218 | 0.226 | 0.232 | 0.235 | 0.238 | 0.242 | 0.247 | 0.254 | 0.261 | 0.267 | 0.272 | 0.278 | 0.286 | 0.297 | 0.308 | 0.319 |
| Wajir                       | 0.08  | 0.08  | 0.074 | 0.069 | 0.068 | 0.069 | 0.067 | 0.059 | 0.049 | 0.037 | 0.038 | 0.038 | 0.041 | 0.044 | 0.043 | 0.042 | 0.053 | 0.071 | 0.086 | 0.097 |
| West Pokot                  | 0.14  | 0.142 | 0.138 | 0.134 | 0.137 | 0.143 | 0.147 | 0.145 | 0.141 | 0.137 | 0.136 | 0.14  | 0.146 | 0.152 | 0.156 | 0.161 | 0.17  | 0.183 | 0.195 | 0.205 |
| Madagascar                  | 0.158 | 0.163 | 0.169 | 0.175 | 0.18  | 0.185 | 0.19  | 0.196 | 0.202 | 0.207 | 0.212 | 0.219 | 0.226 | 0.233 | 0.238 | 0.244 | 0.249 | 0.253 | 0.257 | 0.26  |
| Malawi                      | 0.119 | 0.123 | 0.127 | 0.131 | 0.134 | 0.137 | 0.14  | 0.144 | 0.147 | 0.151 | 0.156 | 0.16  | 0.164 | 0.169 | 0.174 | 0.18  | 0.184 | 0.189 | 0.192 | 0.196 |
| Mozambique                  | 0.103 | 0.107 | 0.109 | 0.112 | 0.114 | 0.116 | 0.118 | 0.119 | 0.121 | 0.123 | 0.125 | 0.127 | 0.128 | 0.128 | 0.129 | 0.129 | 0.129 | 0.129 | 0.129 | 0.131 |
| Rwanda                      | 0.176 | 0.181 | 0.186 | 0.19  | 0.194 | 0.197 | 0.2   | 0.203 | 0.206 | 0.211 | 0.216 | 0.222 | 0.228 | 0.235 | 0.24  | 0.246 | 0.251 | 0.256 | 0.26  | 0.264 |
| Somalia                     | 0.113 | 0.115 | 0.117 | 0.119 | 0.12  | 0.123 | 0.125 | 0.128 | 0.13  | 0.132 | 0.134 | 0.134 | 0.136 | 0.137 | 0.138 | 0.14  | 0.141 | 0.144 | 0.147 | 0.15  |
| South Sudan                 | 0.139 | 0.141 | 0.143 | 0.145 | 0.148 | 0.15  | 0.153 | 0.155 | 0.158 | 0.16  | 0.162 | 0.165 | 0.167 | 0.169 | 0.17  | 0.172 | 0.173 | 0.175 | 0.176 | 0.178 |
| Tanzania                    | 0.16  | 0.163 | 0.167 | 0.171 | 0.176 | 0.18  | 0.186 | 0.193 | 0.2   | 0.208 | 0.216 | 0.222 | 0.229 | 0.235 | 0.241 | 0.248 | 0.254 | 0.259 | 0.265 | 0.27  |
| Uganda                      | 0.104 | 0.106 | 0.108 | 0.112 | 0.116 | 0.12  | 0.124 | 0.129 | 0.133 | 0.136 | 0.138 | 0.141 | 0.145 | 0.148 | 0.151 | 0.154 | 0.156 | 0.158 | 0.16  | 0.161 |
| Zambia                      | 0.236 | 0.238 | 0.24  | 0.242 | 0.244 | 0.246 | 0.249 | 0.252 | 0.257 | 0.263 | 0.268 | 0.274 | 0.28  | 0.285 | 0.29  | 0.294 | 0.299 | 0.303 | 0.306 | 0.309 |
| Southern sub-Saharan Africa | 0.388 | 0.393 | 0.4   | 0.409 | 0.417 | 0.422 | 0.428 | 0.436 | 0.445 | 0.452 | 0.457 | 0.463 | 0.471 | 0.48  | 0.487 | 0.492 | 0.496 | 0.503 | 0.511 | 0.517 |
| Botswana                    | 0.253 | 0.26  | 0.269 | 0.279 | 0.289 | 0.299 | 0.309 | 0.319 | 0.329 | 0.339 | 0.349 | 0.36  | 0.37  | 0.381 | 0.393 | 0.404 | 0.417 | 0.429 | 0.44  | 0.452 |
| Lesotho                     | 0.221 | 0.223 | 0.227 | 0.232 | 0.238 | 0.242 | 0.247 | 0.254 | 0.263 | 0.269 | 0.276 | 0.282 | 0.288 | 0.293 | 0.299 | 0.304 | 0.31  | 0.315 | 0.32  | 0.327 |
| Namibia                     | 0.324 | 0.329 | 0.335 | 0.342 | 0.349 | 0.356 | 0.364 | 0.371 | 0.379 | 0.386 | 0.393 | 0.401 | 0.408 | 0.414 | 0.421 | 0.427 | 0.432 | 0.438 | 0.444 | 0.449 |
| South Africa                | 0.426 | 0.431 | 0.439 | 0.45  | 0.458 | 0.463 | 0.469 | 0.477 | 0.487 | 0.494 | 0.499 | 0.504 | 0.512 | 0.521 | 0.529 | 0.532 | 0.535 | 0.542 | 0.549 | 0.554 |
| Swaziland                   | 0.283 | 0.289 | 0.294 | 0.299 | 0.305 | 0.311 | 0.317 | 0.323 | 0.329 | 0.334 | 0.34  | 0.348 | 0.356 | 0.363 | 0.371 | 0.379 | 0.388 | 0.398 | 0.408 | 0.417 |
| Zimbabwe                    | 0.246 | 0.252 | 0.258 | 0.264 | 0.271 | 0.277 | 0.283 | 0.288 | 0.294 | 0.3   | 0.308 | 0.316 | 0.326 | 0.336 | 0.346 | 0.358 | 0.369 | 0.38  | 0.39  | 0.4   |
| Western sub-Saharan Africa  | 0.206 | 0.211 | 0.216 | 0.221 | 0.227 | 0.233 | 0.239 | 0.244 | 0.25  | 0.255 | 0.259 | 0.264 | 0.268 | 0.271 | 0.275 | 0.279 | 0.282 | 0.284 | 0.287 | 0.29  |
| Benin                       | 0.147 | 0.15  | 0.153 | 0.156 | 0.159 | 0.162 | 0.165 | 0.168 | 0.171 | 0.174 | 0.178 | 0.182 | 0.185 | 0.189 | 0.193 | 0.197 | 0.201 | 0.206 | 0.21  | 0.214 |
| Burkina Faso                | 0.095 | 0.095 | 0.096 | 0.098 | 0.1   | 0.101 | 0.102 | 0.103 | 0.105 | 0.108 | 0.111 | 0.113 | 0.115 | 0.117 | 0.119 | 0.123 | 0.126 | 0.129 | 0.132 | 0.136 |
| Cameroon                    | 0.215 | 0.218 | 0.222 | 0.225 | 0.229 | 0.234 | 0.238 | 0.244 | 0.25  | 0.256 | 0.261 | 0.267 | 0.273 | 0.28  | 0.288 | 0.295 | 0.303 | 0.311 | 0.318 | 0.326 |
| Cape Verde                  | 0.193 | 0.2   | 0.207 | 0.213 | 0.218 | 0.223 | 0.227 | 0.231 | 0.235 | 0.239 | 0.244 | 0.247 | 0.25  | 0.254 | 0.259 | 0.265 | 0.272 | 0.281 | 0.29  | 0.299 |
| Chad                        | 0.095 | 0.096 | 0.097 | 0.097 | 0.098 | 0.099 | 0.1   | 0.101 | 0.101 | 0.101 | 0.1   | 0.1   | 0.099 | 0.1   | 0.101 | 0.103 | 0.105 | 0.108 | 0.111 | 0.115 |
| Cote d'Ivoire               | 0.19  | 0.195 | 0.199 | 0.204 | 0.208 | 0.213 | 0.217 | 0.219 | 0.222 | 0.224 | 0.226 | 0.228 | 0.23  | 0.233 | 0.236 | 0.24  | 0.245 | 0.252 | 0.259 | 0.266 |
| The Gambia                  | 0.153 | 0.155 | 0.158 | 0.161 | 0.165 | 0.169 | 0.173 | 0.177 | 0.181 | 0.185 | 0.189 | 0.192 | 0.196 | 0.202 | 0.208 | 0.214 | 0.221 | 0.227 | 0.233 | 0.238 |
| Ghana                       | 0.285 | 0.292 | 0.296 | 0.298 | 0.301 | 0.306 | 0.315 | 0.323 | 0.329 | 0.332 | 0.337 | 0.343 | 0.346 | 0.349 | 0.352 | 0.356 | 0.361 | 0.365 | 0.37  | 0.374 |
| Guinea                      | 0.12  | 0.122 | 0.123 | 0.125 | 0.128 | 0.131 | 0.133 | 0.136 | 0.138 | 0.14  | 0.143 | 0.145 | 0.147 | 0.148 | 0.15  | 0.152 | 0.155 | 0.157 | 0.159 | 0.161 |
| Guinea-Bissau               | 0.137 | 0.138 | 0.14  | 0.142 | 0.143 | 0.145 | 0.148 | 0.149 | 0.15  | 0.152 | 0.153 | 0.155 | 0.156 | 0.158 | 0.16  | 0.163 | 0.167 | 0.171 | 0.174 | 0.178 |
| Liberia                     | 0.16  | 0.165 | 0.169 | 0.173 | 0.177 | 0.18  | 0.182 | 0.184 | 0.186 | 0.189 | 0.192 | 0.194 | 0.196 | 0.198 | 0.2   | 0.203 | 0.205 | 0.208 | 0.212 | 0.216 |
| Mali                        | 0.088 | 0.09  | 0.092 | 0.094 | 0.095 | 0.097 | 0.099 | 0.102 | 0.104 | 0.107 | 0.109 | 0.112 | 0.114 | 0.116 | 0.117 | 0.119 | 0.121 | 0.123 | 0.125 | 0.128 |
| Mauritania                  | 0.203 | 0.207 | 0.21  | 0.212 | 0.214 | 0.217 | 0.22  | 0.223 | 0.226 | 0.229 | 0.232 | 0.238 | 0.244 | 0.251 | 0.257 | 0.264 | 0.271 | 0.278 | 0.285 | 0.292 |
| Niger                       | 0.077 | 0.077 | 0.077 | 0.075 | 0.074 | 0.073 | 0.072 | 0.07  | 0.067 | 0.064 | 0.062 | 0.059 | 0.056 | 0.056 | 0.059 | 0.064 | 0.07  | 0.076 | 0.082 | 0.088 |
| Nigeria                     | 0.237 | 0.245 | 0.252 | 0.26  | 0.268 | 0.276 | 0.284 | 0.292 | 0.3   | 0.307 | 0.313 | 0.319 | 0.324 | 0.329 | 0.333 | 0.337 | 0.339 | 0.339 | 0.341 | 0.342 |
| Sao Tome and Principe       | 0.184 | 0.19  | 0.197 | 0.204 | 0.209 | 0.215 | 0.221 | 0.228 | 0.234 | 0.24  | 0.244 | 0.249 | 0.253 | 0.257 | 0.26  | 0.264 | 0.268 | 0.273 | 0.278 | 0.283 |
| Senegal                     | 0.157 | 0.159 | 0.161 | 0.163 | 0.165 | 0.168 | 0.171 | 0.174 | 0.176 | 0.18  | 0.184 | 0.188 | 0.192 | 0.198 | 0.204 | 0.21  | 0.216 | 0.222 | 0.23  | 0.237 |
| Sierra Leone                | 0.149 | 0.153 | 0.156 | 0.16  | 0.163 | 0.167 | 0.17  | 0.173 | 0.175 | 0.176 | 0.178 | 0.18  | 0.182 | 0.183 | 0.185 | 0.187 | 0.189 | 0.191 | 0.194 | 0.198 |
| Togo                        | 0.163 | 0.167 | 0.171 | 0.174 | 0.179 | 0.183 | 0.187 | 0.192 | 0.197 | 0.203 | 0.209 | 0.214 | 0.219 | 0.224 | 0.229 | 0.234 | 0.239 | 0.244 | 0.25  | 0.256 |

Appendix Table 10. Socio-Demographic Index values for all estimated GBD 2017 locations, 1990-2017

| Location                                         | 1990  | 1991  | 1992  | 1993  | 1994  | 1995  | 1996  | 1997  | 1998  | 1999  | 2000  | 2001  | 2002  | 2003  | 2004  | 2005  | 2006  | 2007  | 2008  | 2009  | 2010  | 2011  | 2012  | 2013  | 2014  | 2015  | 2016  | 2017  |
|--------------------------------------------------|-------|-------|-------|-------|-------|-------|-------|-------|-------|-------|-------|-------|-------|-------|-------|-------|-------|-------|-------|-------|-------|-------|-------|-------|-------|-------|-------|-------|
| Global                                           | 0.523 | 0.529 | 0.534 | 0.539 | 0.543 | 0.548 | 0.553 | 0.557 | 0.561 | 0.566 | 0.571 | 0.576 | 0.581 | 0.585 | 0.589 | 0.595 | 0.601 | 0.606 | 0.611 | 0.616 | 0.62  | 0.623 | 0.628 | 0.633 | 0.639 | 0.644 | 0.647 | 0.652 |
| Central Europe, Eastern Europe, and Central Asia | 0.656 | 0.662 | 0.67  | 0.674 | 0.677 | 0.682 | 0.686 | 0.689 | 0.691 | 0.694 | 0.698 | 0.701 | 0.703 | 0.709 | 0.715 | 0.72  | 0.725 | 0.73  | 0.735 | 0.739 | 0.743 | 0.747 | 0.75  | 0.753 | 0.757 | 0.76  | 0.763 | 0.766 |
| Central Asia                                     | 0.563 | 0.567 | 0.57  | 0.573 | 0.575 | 0.577 | 0.578 | 0.579 | 0.58  | 0.582 | 0.583 | 0.584 | 0.585 | 0.586 | 0.587 | 0.588 | 0.589 | 0.59  | 0.591 | 0.592 | 0.593 | 0.594 | 0.595 | 0.596 | 0.597 | 0.598 | 0.599 | 0.601 |
| Armenia                                          | 0.555 | 0.559 | 0.56  | 0.562 | 0.565 | 0.567 | 0.57  | 0.573 | 0.577 | 0.581 | 0.586 | 0.592 | 0.6   | 0.61  | 0.619 | 0.629 | 0.639 | 0.65  | 0.66  | 0.667 | 0.673 | 0.678 | 0.683 | 0.687 | 0.691 | 0.695 | 0.699 | 0.702 |
| Azerbaijan                                       | 0.611 | 0.613 | 0.616 | 0.617 | 0.62  | 0.623 | 0.626 | 0.629 | 0.632 | 0.635 | 0.638 | 0.641 | 0.644 | 0.647 | 0.65  | 0.653 | 0.656 | 0.659 | 0.662 | 0.665 | 0.668 | 0.671 | 0.674 | 0.677 | 0.68  | 0.683 | 0.686 | 0.689 |
| Georgia                                          | 0.654 | 0.66  | 0.661 | 0.663 | 0.665 | 0.667 | 0.669 | 0.671 | 0.673 | 0.675 | 0.677 | 0.679 | 0.681 | 0.683 | 0.685 | 0.687 | 0.689 | 0.691 | 0.693 | 0.695 | 0.697 | 0.699 | 0.701 | 0.703 | 0.705 | 0.707 | 0.709 | 0.711 |
| Kazakhstan                                       | 0.613 | 0.615 | 0.619 | 0.623 | 0.627 | 0.632 | 0.638 | 0.643 | 0.649 | 0.656 | 0.664 | 0.673 | 0.681 | 0.69  | 0.7   | 0.71  | 0.72  | 0.73  | 0.74  | 0.75  | 0.76  | 0.77  | 0.78  | 0.79  | 0.8   | 0.81  | 0.82  | 0.83  |
| Kyrgyzstan                                       | 0.565 | 0.571 | 0.576 | 0.577 | 0.577 | 0.577 | 0.577 | 0.577 | 0.577 | 0.577 | 0.577 | 0.577 | 0.577 | 0.577 | 0.577 | 0.577 | 0.577 | 0.577 | 0.577 | 0.577 | 0.577 | 0.577 | 0.577 | 0.577 | 0.577 | 0.577 | 0.577 | 0.577 |
| Mongolia                                         | 0.537 | 0.545 | 0.55  | 0.555 | 0.559 | 0.564 | 0.569 | 0.573 | 0.577 | 0.581 | 0.585 | 0.589 | 0.594 | 0.598 | 0.603 | 0.608 | 0.614 | 0.619 | 0.624 | 0.628 | 0.632 | 0.636 | 0.641 | 0.646 | 0.65  | 0.654 | 0.658 | 0.662 |
| Tajikistan                                       | 0.474 | 0.481 | 0.485 | 0.487 | 0.488 | 0.491 | 0.494 | 0.497 | 0.499 | 0.502 | 0.505 | 0.508 | 0.511 | 0.514 | 0.517 | 0.52  | 0.523 | 0.526 | 0.529 | 0.532 | 0.535 | 0.538 | 0.541 | 0.544 | 0.547 | 0.55  | 0.553 | 0.557 |
| Turkmenistan                                     | 0.588 | 0.592 | 0.594 | 0.599 | 0.602 | 0.604 | 0.606 | 0.608 | 0.61  | 0.612 | 0.614 | 0.617 | 0.62  | 0.623 | 0.626 | 0.629 | 0.632 | 0.635 | 0.638 | 0.641 | 0.644 | 0.647 | 0.651 | 0.657 | 0.663 | 0.669 | 0.678 | 0.691 |
| Ukraine                                          | 0.481 | 0.481 | 0.487 | 0.493 | 0.497 | 0.502 | 0.508 | 0.513 | 0.52  | 0.528 | 0.532 | 0.537 | 0.543 | 0.549 | 0.555 | 0.56  | 0.565 | 0.57  | 0.575 | 0.581 | 0.587 | 0.592 | 0.598 | 0.604 | 0.61  | 0.618 | 0.624 | 0.631 |
| Central Europe                                   | 0.665 | 0.671 | 0.677 | 0.683 | 0.688 | 0.694 | 0.698 | 0.703 | 0.711 | 0.723 | 0.731 | 0.738 | 0.743 | 0.751 | 0.757 | 0.762 | 0.767 | 0.772 | 0.776 | 0.78  | 0.783 | 0.787 | 0.791 | 0.795 | 0.799 | 0.802 | 0.805 | 0.811 |
| Albania                                          | 0.548 | 0.545 | 0.542 | 0.541 | 0.542 | 0.546 | 0.552 | 0.558 | 0.566 | 0.577 | 0.584 | 0.593 | 0.602 | 0.611 | 0.619 | 0.627 | 0.635 | 0.643 | 0.648 | 0.653 | 0.658 | 0.661 | 0.665 | 0.668 | 0.672 | 0.676 | 0.681 | 0.685 |
| Bosnia and Herzegovina                           | 0.497 | 0.499 | 0.5   | 0.5   | 0.501 | 0.507 | 0.525 | 0.549 | 0.571 | 0.592 | 0.607 | 0.619 | 0.63  | 0.639 | 0.647 | 0.654 | 0.66  | 0.667 | 0.673 | 0.679 | 0.685 | 0.69  | 0.694 | 0.699 | 0.703 | 0.706 | 0.71  | 0.713 |
| Bulgaria                                         | 0.658 | 0.668 | 0.676 | 0.684 | 0.693 | 0.699 | 0.705 | 0.706 | 0.704 | 0.703 | 0.708 | 0.715 | 0.721 | 0.726 | 0.731 | 0.736 | 0.741 | 0.746 | 0.751 | 0.757 | 0.765 | 0.771 | 0.775 | 0.778 | 0.781 | 0.784 | 0.788 | 0.792 |
| Croatia                                          | 0.725 | 0.73  | 0.732 | 0.732 | 0.731 | 0.731 | 0.732 | 0.733 | 0.734 | 0.735 | 0.736 | 0.737 | 0.738 | 0.739 | 0.74  | 0.741 | 0.742 | 0.743 | 0.744 | 0.745 | 0.746 | 0.747 | 0.748 | 0.749 | 0.75  | 0.751 | 0.752 | 0.753 |
| Czech Republic                                   | 0.711 | 0.717 | 0.726 | 0.734 | 0.757 | 0.769 | 0.777 | 0.783 | 0.788 | 0.794 | 0.799 | 0.804 | 0.809 | 0.814 | 0.819 | 0.823 | 0.827 | 0.83  | 0.833 | 0.836 | 0.84  | 0.843 | 0.846 | 0.847 | 0.848 | 0.849 | 0.851 | 0.853 |
| Hungary                                          | 0.678 | 0.683 | 0.691 | 0.699 | 0.707 | 0.716 | 0.722 | 0.732 | 0.739 | 0.742 | 0.751 | 0.758 | 0.764 | 0.77  | 0.776 | 0.781 | 0.786 | 0.791 | 0.795 | 0.799 | 0.803 | 0.808 | 0.813 | 0.818 | 0.823 | 0.828 | 0.833 | 0.838 |
| Macedonia                                        | 0.626 | 0.629 | 0.63  | 0.631 | 0.632 | 0.635 | 0.64  | 0.647 | 0.654 | 0.661 | 0.665 | 0.67  | 0.677 | 0.683 | 0.69  | 0.698 | 0.708 | 0.709 | 0.715 | 0.719 | 0.724 | 0.729 | 0.734 | 0.739 | 0.744 | 0.748 | 0.751 | 0.754 |
| Montenegro                                       | 0.705 | 0.706 | 0.705 | 0.701 | 0.698 | 0.696 | 0.696 | 0.698 | 0.7   | 0.703 | 0.706 | 0.711 | 0.716 | 0.721 | 0.726 | 0.731 | 0.737 | 0.743 | 0.75  | 0.756 | 0.761 | 0.767 | 0.771 | 0.775 | 0.779 | 0.782 | 0.785 | 0.788 |
| Poland                                           | 0.662 | 0.668 | 0.678 | 0.686 | 0.697 | 0.707 | 0.714 | 0.724 | 0.733 | 0.741 | 0.75  | 0.759 | 0.767 | 0.773 | 0.779 | 0.784 | 0.789 | 0.792 | 0.797 | 0.804 | 0.811 | 0.818 | 0.823 | 0.829 | 0.833 | 0.837 | 0.841 | 0.844 |
| Romania                                          | 0.652 | 0.66  | 0.663 | 0.666 | 0.671 | 0.678 | 0.682 | 0.685 | 0.689 | 0.694 | 0.7   | 0.707 | 0.713 | 0.718 | 0.724 | 0.73  | 0.734 | 0.739 | 0.745 | 0.751 | 0.758 | 0.763 | 0.768 | 0.774 | 0.777 | 0.78  | 0.784 | 0.788 |
| Serbia                                           | 0.632 | 0.638 | 0.643 | 0.642 | 0.641 | 0.641 | 0.643 | 0.648 | 0.653 | 0.655 | 0.661 | 0.665 | 0.669 | 0.673 | 0.678 | 0.684 | 0.692 | 0.699 | 0.705 | 0.709 | 0.713 | 0.718 | 0.723 | 0.728 | 0.734 | 0.74  | 0.747 | 0.752 |
| Slovakia                                         | 0.684 | 0.69  | 0.699 | 0.71  | 0.722 | 0.732 | 0.74  | 0.748 | 0.756 | 0.764 | 0.772 | 0.779 | 0.784 | 0.788 | 0.793 | 0.798 | 0.804 | 0.809 | 0.814 | 0.818 | 0.823 | 0.828 | 0.834 | 0.838 | 0.843 | 0.848 | 0.853 | 0.858 |
| Slovenia                                         | 0.741 | 0.745 | 0.751 | 0.757 | 0.764 | 0.771 | 0.778 | 0.784 | 0.79  | 0.796 | 0.802 | 0.808 | 0.814 | 0.819 | 0.824 | 0.829 | 0.834 | 0.839 | 0.844 | 0.849 | 0.854 | 0.859 | 0.864 | 0.869 | 0.874 | 0.879 | 0.884 | 0.889 |
| Eastern Europe                                   | 0.678 | 0.685 | 0.688 | 0.698 | 0.7   | 0.704 | 0.708 | 0.708 | 0.711 | 0.711 | 0.712 | 0.713 | 0.713 | 0.713 | 0.713 | 0.713 | 0.713 | 0.713 | 0.713 | 0.713 | 0.713 | 0.713 | 0.713 | 0.713 | 0.713 | 0.713 | 0.713 | 0.713 |
| Belarus                                          | 0.625 | 0.631 | 0.636 | 0.641 | 0.645 | 0.647 | 0.65  | 0.654 | 0.657 | 0.661 | 0.665 | 0.67  | 0.676 | 0.682 | 0.689 | 0.696 | 0.704 | 0.712 | 0.72  | 0.727 | 0.733 | 0.74  | 0.747 | 0.753 | 0.759 | 0.764 | 0.769 | 0.773 |
| Estonia                                          | 0.711 | 0.719 | 0.728 | 0.736 | 0.742 | 0.746 | 0.75  | 0.755 | 0.76  | 0.766 | 0.772 | 0.778 | 0.783 | 0.788 | 0.794 | 0.799 | 0.806 | 0.813 | 0.82  | 0.826 | 0.832 | 0.838 | 0.843 | 0.847 | 0.851 | 0.854 | 0.856 | 0.858 |
| Latvia                                           | 0.696 | 0.703 | 0.712 | 0.721 | 0.727 | 0.731 | 0.733 | 0.734 | 0.735 | 0.738 | 0.741 | 0.745 | 0.75  | 0.757 | 0.763 | 0.769 | 0.776 | 0.783 | 0.792 | 0.8   | 0.806 | 0.811 | 0.814 | 0.816 | 0.817 | 0.819 | 0.822 | 0.825 |
| Lithuania                                        | 0.707 | 0.717 | 0.727 | 0.735 | 0.743 | 0.751 | 0.759 | 0.767 | 0.774 | 0.78  | 0.786 | 0.793 | 0.798 | 0.802 | 0.807 | 0.811 | 0.815 | 0.819 | 0.823 | 0.828 | 0.833 | 0.838 | 0.843 | 0.848 | 0.853 | 0.858 | 0.863 | 0.868 |
| Moldova                                          | 0.575 | 0.578 | 0.58  | 0.582 | 0.583 | 0.584 | 0.584 | 0.582 | 0.58  | 0.577 | 0.574 | 0.574 | 0.577 | 0.582 | 0.588 | 0.595 | 0.602 | 0.61  | 0.618 | 0.624 | 0.632 | 0.64  | 0.647 | 0.654 | 0.66  | 0.666 | 0.671 | 0.676 |
| Russia Federation                                | 0.683 | 0.692 | 0.704 | 0.708 | 0.708 | 0.714 | 0.718 | 0.719 | 0.72  | 0.722 | 0.724 | 0.724 | 0.728 | 0.734 | 0.742 | 0.747 | 0.752 | 0.757 | 0.763 | 0.768 | 0.77  | 0.772 | 0.774 | 0.776 | 0.779 | 0.782 | 0.785 | 0.789 |
| Ukraine                                          | 0.664 | 0.667 | 0.673 | 0.681 | 0.687 | 0.696 | 0.705 | 0.713 | 0.721 | 0.729 | 0.737 | 0.745 | 0.753 | 0.761 | 0.769 | 0.777 | 0.785 | 0.793 | 0.801 | 0.809 | 0.817 | 0.825 | 0.833 | 0.841 | 0.849 | 0.857 | 0.865 | 0.873 |
| High-income                                      | 0.769 | 0.774 | 0.779 | 0.783 | 0.787 | 0.792 | 0.796 | 0.798 | 0.801 | 0.804 | 0.807 | 0.811 | 0.814 | 0.817 | 0.822 | 0.827 | 0.832 | 0.837 | 0.842 | 0.847 | 0.852 | 0.857 | 0.862 | 0.867 | 0.872 | 0.877 | 0.882 | 0.887 |
| Australia                                        | 0.783 | 0.786 | 0.79  | 0.794 | 0.797 | 0.801 | 0.805 | 0.809 | 0.813 | 0.817 | 0.821 | 0.825 | 0.828 | 0.832 | 0.835 | 0.837 | 0.838 | 0.84  | 0.842 | 0.845 | 0.848 | 0.851 | 0.854 | 0.857 | 0.86  | 0.863 | 0.866 | 0.869 |
| Australia                                        | 0.786 | 0.79  | 0.793 | 0.797 | 0.801 | 0.805 | 0.81  | 0.814 | 0.818 | 0.822 | 0.826 | 0.83  | 0.833 | 0.837 | 0.84  | 0.843 | 0.846 | 0.849 | 0.852 | 0.855 | 0.858 | 0.861 | 0.864 | 0.867 | 0.87  | 0.873 | 0.876 | 0.879 |
| New Zealand                                      | 0.765 | 0.768 | 0.771 | 0.774 | 0.777 | 0.78  | 0.783 | 0.786 | 0.789 | 0.792 | 0.795 | 0.798 | 0.802 | 0.805 | 0.809 | 0.811 | 0.814 | 0.817 | 0.82  | 0.823 | 0.826 | 0.829 | 0.832 | 0.835 | 0.838 | 0.841 | 0.844 | 0.847 |
| High-income Asia-Pacific                         | 0.783 | 0.789 | 0.794 | 0.799 | 0.804 | 0.809 | 0.813 | 0.817 | 0.82  | 0.825 | 0.828 | 0.831 | 0.833 | 0.836 | 0.839 | 0.842 | 0.844 | 0.846 | 0.849 | 0.851 | 0.853 | 0.856 | 0.858 | 0.861 | 0.863 | 0.865 | 0.867 | 0.869 |
| Bhutan                                           | 0.728 | 0.733 | 0.739 | 0.745 | 0.751 | 0.757 | 0.763 | 0.769 | 0.774 | 0.779 | 0.784 | 0.789 | 0.795 | 0.802 | 0.808 | 0.814 | 0.819 | 0.824 | 0.828 | 0.831 | 0.835 | 0.838 | 0.842 | 0.845 | 0.848 | 0.851 | 0.854 | 0.856 |
| Japan                                            | 0.883 | 0.885 | 0.887 | 0.889 | 0.891 | 0.893 | 0.895 | 0.897 | 0.899 | 0.901 | 0.903 | 0.905 | 0.907 | 0.909 | 0.911 | 0.913 | 0.915 | 0.917 | 0.919 | 0.921 | 0.923 | 0.925 | 0.927 | 0.929 | 0.931 | 0.933 | 0.935 | 0.937 |
| Aichi                                            | 0.812 | 0.816 | 0.821 | 0.825 | 0.829 | 0.833 | 0.836 | 0.839 | 0.841 |       |       |       |       |       |       |       |       |       |       |       |       |       |       |       |       |       |       |       |

Appendix Table 10. Socio-Demographic Index values for all estimated GBD 2017 locations, 1990-2017

| Location            | 1990  | 1991  | 1992  | 1993  | 1994  | 1995  | 1996  | 1997  | 1998  | 1999  | 2000  | 2001  | 2002  | 2003  | 2004  | 2005  | 2006  | 2007  | 2008  | 2009  | 2010  | 2011  | 2012  | 2013  | 2014  | 2015  | 2016  | 2017  |       |       |
|---------------------|-------|-------|-------|-------|-------|-------|-------|-------|-------|-------|-------|-------|-------|-------|-------|-------|-------|-------|-------|-------|-------|-------|-------|-------|-------|-------|-------|-------|-------|-------|
| Oklahoma            | 0.749 | 0.751 | 0.755 | 0.758 | 0.76  | 0.764 | 0.768 | 0.768 | 0.768 | 0.769 | 0.772 | 0.777 | 0.781 | 0.784 | 0.786 | 0.785 | 0.784 | 0.786 | 0.792 | 0.8   | 0.808 | 0.813 | 0.818 | 0.824 | 0.829 | 0.835 | 0.838 | 0.838 |       |       |
| Oregon              | 0.785 | 0.788 | 0.791 | 0.794 | 0.797 | 0.802 | 0.806 | 0.808 | 0.811 | 0.814 | 0.818 | 0.824 | 0.827 | 0.831 | 0.833 | 0.835 | 0.835 | 0.835 | 0.836 | 0.841 | 0.847 | 0.852 | 0.856 | 0.861 | 0.864 | 0.867 | 0.87  | 0.870 |       |       |
| Pennsylvania        | 0.8   | 0.804 | 0.808 | 0.812 | 0.816 | 0.821 | 0.824 | 0.826 | 0.828 | 0.831 | 0.833 | 0.837 | 0.84  | 0.842 | 0.845 | 0.845 | 0.845 | 0.847 | 0.851 | 0.855 | 0.86  | 0.863 | 0.866 | 0.869 | 0.871 | 0.875 | 0.878 | 0.879 |       |       |
| Rhode Island        | 0.85  | 0.834 | 0.828 | 0.825 | 0.827 | 0.831 | 0.834 | 0.835 | 0.838 | 0.84  | 0.843 | 0.848 | 0.851 | 0.854 | 0.857 | 0.858 | 0.859 | 0.862 | 0.866 | 0.87  | 0.875 | 0.877 | 0.88  | 0.882 | 0.885 | 0.887 | 0.889 | 0.89  |       |       |
| South Carolina      | 0.752 | 0.757 | 0.762 | 0.768 | 0.772 | 0.777 | 0.781 | 0.782 | 0.783 | 0.785 | 0.787 | 0.793 | 0.796 | 0.799 | 0.801 | 0.8   | 0.799 | 0.802 | 0.808 | 0.815 | 0.822 | 0.826 | 0.831 | 0.834 | 0.838 | 0.842 | 0.845 | 0.846 |       |       |
| South Dakota        | 0.769 | 0.772 | 0.777 | 0.783 | 0.788 | 0.794 | 0.799 | 0.801 | 0.804 | 0.805 | 0.808 | 0.811 | 0.813 | 0.814 | 0.816 | 0.814 | 0.812 | 0.814 | 0.819 | 0.826 | 0.833 | 0.838 | 0.842 | 0.847 | 0.851 | 0.856 | 0.859 | 0.86  |       |       |
| Tennessee           | 0.749 | 0.752 | 0.757 | 0.761 | 0.765 | 0.77  | 0.774 | 0.775 | 0.777 | 0.779 | 0.78  | 0.786 | 0.788 | 0.789 | 0.79  | 0.789 | 0.786 | 0.789 | 0.795 | 0.803 | 0.811 | 0.815 | 0.819 | 0.823 | 0.827 | 0.832 | 0.836 | 0.837 |       |       |
| Texas               | 0.743 | 0.745 | 0.747 | 0.75  | 0.752 | 0.757 | 0.761 | 0.763 | 0.764 | 0.766 | 0.769 | 0.775 | 0.779 | 0.782 | 0.784 | 0.783 | 0.782 | 0.785 | 0.792 | 0.801 | 0.809 | 0.815 | 0.82  | 0.824 | 0.829 | 0.834 | 0.837 | 0.838 |       |       |
| Utah                | 0.761 | 0.762 | 0.766 | 0.771 | 0.776 | 0.781 | 0.786 | 0.79  | 0.792 | 0.794 | 0.796 | 0.8   | 0.804 | 0.808 | 0.81  | 0.808 | 0.809 | 0.811 | 0.817 | 0.825 | 0.832 | 0.837 | 0.841 | 0.845 | 0.848 | 0.852 | 0.855 | 0.856 |       |       |
| Vermont             | 0.815 | 0.819 | 0.823 | 0.827 | 0.831 | 0.833 | 0.837 | 0.839 | 0.841 | 0.844 | 0.848 | 0.853 | 0.857 | 0.86  | 0.864 | 0.866 | 0.866 | 0.869 | 0.872 | 0.876 | 0.88  | 0.882 | 0.885 | 0.887 | 0.889 | 0.893 | 0.895 | 0.896 |       |       |
| Virginia            | 0.8   | 0.803 | 0.807 | 0.811 | 0.814 | 0.818 | 0.822 | 0.825 | 0.828 | 0.83  | 0.832 | 0.834 | 0.838 | 0.841 | 0.845 | 0.846 | 0.847 | 0.851 | 0.856 | 0.862 | 0.867 | 0.871 | 0.874 | 0.877 | 0.88  | 0.883 | 0.885 | 0.885 |       |       |
| Washington          | 0.797 | 0.8   | 0.804 | 0.807 | 0.811 | 0.816 | 0.821 | 0.823 | 0.827 | 0.831 | 0.834 | 0.84  | 0.844 | 0.846 | 0.849 | 0.848 | 0.848 | 0.85  | 0.855 | 0.86  | 0.866 | 0.871 | 0.874 | 0.877 | 0.881 | 0.883 | 0.884 | 0.884 |       |       |
| West Virginia       | 0.749 | 0.752 | 0.756 | 0.761 | 0.764 | 0.769 | 0.773 | 0.774 | 0.775 | 0.776 | 0.778 | 0.783 | 0.786 | 0.787 | 0.784 | 0.784 | 0.784 | 0.787 | 0.793 | 0.799 | 0.802 | 0.806 | 0.811 | 0.814 | 0.818 | 0.822 | 0.824 | 0.825 |       |       |
| Wisconsin           | 0.801 | 0.804 | 0.808 | 0.812 | 0.816 | 0.819 | 0.823 | 0.825 | 0.828 | 0.828 | 0.831 | 0.835 | 0.839 | 0.841 | 0.843 | 0.843 | 0.843 | 0.845 | 0.849 | 0.853 | 0.858 | 0.863 | 0.868 | 0.871 | 0.874 | 0.877 | 0.878 | 0.878 |       |       |
| Wyoming             | 0.766 | 0.771 | 0.777 | 0.782 | 0.786 | 0.792 | 0.796 | 0.797 | 0.799 | 0.801 | 0.804 | 0.809 | 0.813 | 0.816 | 0.818 | 0.819 | 0.819 | 0.823 | 0.831 | 0.838 | 0.846 | 0.851 | 0.855 | 0.858 | 0.862 | 0.866 | 0.869 | 0.869 |       |       |
| South Latin America | 0.594 | 0.6   | 0.607 | 0.613 | 0.619 | 0.626 | 0.632 | 0.638 | 0.643 | 0.648 | 0.652 | 0.655 | 0.659 | 0.662 | 0.667 | 0.671 | 0.677 | 0.679 | 0.682 | 0.685 | 0.69  | 0.695 | 0.7   | 0.704 | 0.707 | 0.713 | 0.717 | 0.72  |       |       |
| Algeria             | 0.59  | 0.595 | 0.604 | 0.61  | 0.617 | 0.624 | 0.631 | 0.635 | 0.64  | 0.644 | 0.647 | 0.649 | 0.65  | 0.653 | 0.656 | 0.656 | 0.659 | 0.662 | 0.667 | 0.672 | 0.675 | 0.677 | 0.681 | 0.686 | 0.691 | 0.696 | 0.702 | 0.707 | 0.71  |       |
| Chile               | 0.6   | 0.608 | 0.615 | 0.62  | 0.626 | 0.633 | 0.64  | 0.647 | 0.654 | 0.661 | 0.667 | 0.674 | 0.681 | 0.687 | 0.692 | 0.696 | 0.698 | 0.701 | 0.704 | 0.708 | 0.714 | 0.721 | 0.727 | 0.732 | 0.738 | 0.742 | 0.746 | 0.748 |       |       |
| Uruguay             | 0.592 | 0.597 | 0.6   | 0.602 | 0.606 | 0.609 | 0.613 | 0.618 | 0.625 | 0.632 | 0.637 | 0.64  | 0.643 | 0.647 | 0.652 | 0.656 | 0.659 | 0.661 | 0.663 | 0.666 | 0.671 | 0.675 | 0.68  | 0.685 | 0.691 | 0.697 | 0.702 | 0.707 |       |       |
| Western Europe      | 0.764 | 0.77  | 0.776 | 0.782 | 0.787 | 0.791 | 0.795 | 0.798 | 0.801 | 0.805 | 0.809 | 0.813 | 0.817 | 0.82  | 0.822 | 0.825 | 0.828 | 0.831 | 0.833 | 0.836 | 0.838 | 0.842 | 0.845 | 0.848 | 0.851 | 0.853 | 0.855 | 0.857 |       |       |
| Andorra             | 0.85  | 0.854 | 0.856 | 0.857 | 0.858 | 0.859 | 0.86  | 0.863 | 0.866 | 0.868 | 0.871 | 0.873 | 0.875 | 0.878 | 0.881 | 0.883 | 0.885 | 0.886 | 0.888 | 0.89  | 0.891 | 0.894 | 0.896 | 0.897 | 0.899 | 0.9   | 0.901 | 0.902 |       |       |
| Austria             | 0.776 | 0.778 | 0.78  | 0.785 | 0.79  | 0.795 | 0.8   | 0.805 | 0.809 | 0.813 | 0.818 | 0.822 | 0.825 | 0.829 | 0.831 | 0.834 | 0.838 | 0.841 | 0.845 | 0.849 | 0.853 | 0.854 | 0.857 | 0.859 | 0.862 | 0.863 | 0.865 | 0.866 |       |       |
| Belgium             | 0.822 | 0.825 | 0.828 | 0.831 | 0.834 | 0.837 | 0.84  | 0.843 | 0.846 | 0.849 | 0.852 | 0.855 | 0.858 | 0.861 | 0.864 | 0.867 | 0.87  | 0.873 | 0.876 | 0.879 | 0.882 | 0.885 | 0.888 | 0.891 | 0.894 | 0.897 | 0.9   | 0.901 |       |       |
| Cyprus              | 0.724 | 0.731 | 0.734 | 0.737 | 0.74  | 0.743 | 0.746 | 0.749 | 0.752 | 0.755 | 0.758 | 0.761 | 0.764 | 0.767 | 0.77  | 0.773 | 0.776 | 0.779 | 0.782 | 0.785 | 0.788 | 0.791 | 0.794 | 0.797 | 0.8   | 0.803 | 0.806 | 0.809 | 0.812 |       |
| Denmark             | 0.846 | 0.849 | 0.852 | 0.855 | 0.858 | 0.862 | 0.866 | 0.87  | 0.874 | 0.877 | 0.881 | 0.884 | 0.888 | 0.891 | 0.895 | 0.897 | 0.898 | 0.9   | 0.902 | 0.904 | 0.907 | 0.911 | 0.914 | 0.917 | 0.921 | 0.924 | 0.928 | 0.931 |       |       |
| Finland             | 0.813 | 0.813 | 0.814 | 0.817 | 0.821 | 0.825 | 0.828 | 0.831 | 0.835 | 0.84  | 0.844 | 0.847 | 0.851 | 0.854 | 0.857 | 0.859 | 0.862 | 0.865 | 0.869 | 0.871 | 0.875 | 0.878 | 0.881 | 0.884 | 0.887 | 0.889 | 0.891 | 0.893 |       |       |
| France              | 0.769 | 0.776 | 0.783 | 0.79  | 0.793 | 0.795 | 0.802 | 0.806 | 0.808 | 0.813 | 0.816 | 0.819 | 0.824 | 0.827 | 0.831 | 0.833 | 0.836 | 0.838 | 0.84  | 0.842 | 0.845 | 0.848 | 0.851 | 0.854 | 0.857 | 0.86  | 0.863 | 0.865 |       |       |
| Germany             | 0.787 | 0.796 | 0.801 | 0.805 | 0.809 | 0.811 | 0.812 | 0.813 | 0.813 | 0.814 | 0.818 | 0.823 | 0.827 | 0.829 | 0.832 | 0.835 | 0.838 | 0.842 | 0.846 | 0.848 | 0.851 | 0.853 | 0.855 | 0.858 | 0.861 | 0.864 | 0.866 | 0.868 | 0.87  |       |
| Greece              | 0.717 | 0.723 | 0.731 | 0.738 | 0.744 | 0.75  | 0.755 | 0.761 | 0.767 | 0.773 | 0.778 | 0.782 | 0.787 | 0.792 | 0.796 | 0.8   | 0.803 | 0.806 | 0.809 | 0.812 | 0.815 | 0.818 | 0.821 | 0.824 | 0.827 | 0.83  | 0.831 | 0.837 | 0.841 |       |
| Iceland             | 0.814 | 0.818 | 0.821 | 0.825 | 0.829 | 0.833 | 0.837 | 0.841 | 0.845 | 0.849 | 0.853 | 0.857 | 0.861 | 0.865 | 0.869 | 0.872 | 0.876 | 0.88  | 0.883 | 0.886 | 0.889 | 0.892 | 0.895 | 0.899 | 0.902 | 0.905 | 0.907 | 0.909 |       |       |
| Ireland             | 0.766 | 0.769 | 0.774 | 0.779 | 0.784 | 0.789 | 0.794 | 0.799 | 0.804 | 0.809 | 0.814 | 0.819 | 0.824 | 0.829 | 0.834 | 0.839 | 0.844 | 0.849 | 0.854 | 0.859 | 0.864 | 0.869 | 0.874 | 0.879 | 0.884 | 0.889 | 0.894 | 0.899 | 0.904 |       |
| Israel              | 0.734 | 0.738 | 0.743 | 0.748 | 0.752 | 0.757 | 0.76  | 0.764 | 0.768 | 0.772 | 0.776 | 0.78  | 0.783 | 0.786 | 0.789 | 0.793 | 0.796 | 0.798 | 0.799 | 0.801 | 0.803 | 0.805 | 0.808 | 0.811 | 0.814 | 0.817 | 0.82  | 0.824 | 0.828 |       |
| Italy               | 0.767 | 0.772 | 0.778 | 0.783 | 0.788 | 0.793 | 0.797 | 0.8   | 0.804 | 0.807 | 0.81  | 0.814 | 0.817 | 0.819 | 0.821 | 0.823 | 0.825 | 0.827 | 0.829 | 0.831 | 0.832 | 0.834 | 0.836 | 0.838 | 0.839 | 0.841 | 0.842 | 0.843 |       |       |
| Luxembourg          | 0.845 | 0.848 | 0.851 | 0.854 | 0.858 | 0.862 | 0.866 | 0.869 | 0.873 | 0.876 | 0.878 | 0.88  | 0.881 | 0.883 | 0.885 | 0.888 | 0.891 | 0.894 | 0.896 | 0.899 | 0.901 | 0.904 | 0.906 | 0.909 | 0.912 | 0.914 | 0.915 | 0.916 |       |       |
| Malta               | 0.729 | 0.733 | 0.737 | 0.743 | 0.748 | 0.752 | 0.756 | 0.761 | 0.766 | 0.771 | 0.774 | 0.778 | 0.782 | 0.786 | 0.79  | 0.793 | 0.796 | 0.799 | 0.802 | 0.805 | 0.808 | 0.811 | 0.814 | 0.817 | 0.82  | 0.823 | 0.826 | 0.829 | 0.833 | 0.836 |
| Netherlands         | 0.827 | 0.832 | 0.837 | 0.841 | 0.845 | 0.849 | 0.852 | 0.855 | 0.858 | 0.862 | 0.866 | 0.87  | 0.873 | 0.876 | 0.879 | 0.882 | 0.885 | 0.887 | 0.89  | 0.892 | 0.895 | 0.898 | 0.901 | 0.904 | 0.906 | 0.908 | 0.91  | 0.912 |       |       |
| Norway              | 0.811 | 0.816 | 0.821 | 0.827 | 0.831 | 0.835 | 0.84  | 0.846 | 0.85  | 0.855 | 0.86  | 0.866 | 0.871 | 0.876 | 0.88  | 0.883 | 0.886 | 0.889 | 0.892 | 0.895 | 0.898 | 0.901 | 0.904 | 0.906 | 0.909 | 0.911 | 0.914 | 0.917 |       |       |
| Portugal            | 0.642 | 0.65  | 0.656 | 0.663 | 0.67  | 0.676 | 0.682 | 0.688 | 0.694 | 0.699 | 0.704 | 0.71  | 0.716 | 0.722 | 0.727 | 0.732 | 0.737 | 0.742 | 0.747 | 0.752 | 0.757 | 0.762 | 0.767 | 0.772 | 0.777 | 0.782 | 0.787 | 0.792 | 0.797 |       |
| Spain               | 0.715 | 0.723 | 0.731 | 0.738 | 0.745 | 0.752 | 0.758 | 0.763 | 0.768 | 0.773 | 0.778 | 0.782 | 0.786 | 0.79  | 0.794 | 0.797 | 0.799 | 0.802 | 0.805 | 0.808 | 0.811 | 0.814 | 0.817 | 0.82  | 0.823 | 0.826 | 0.829 | 0.832 | 0.835 |       |
| Sweden              | 0.784 | 0.789 | 0.795 | 0.802 | 0.808 | 0.815 | 0.82  | 0.825 | 0.831 | 0.835 | 0.838 | 0.841 | 0.844 | 0.847 | 0.85  | 0.853 | 0.855 | 0.857 | 0.86  | 0.862 | 0.865 | 0.868 | 0.871 | 0.874 | 0.876 | 0.879 | 0.881 | 0.883 |       |       |
| Stockholm           | 0.825 | 0.831 | 0.835 | 0.84  | 0.845 | 0.85  | 0.854 | 0.859 | 0.864 | 0.867 | 0.871 | 0.873 | 0.876 | 0.879 | 0.882 | 0.885 | 0.888 | 0.891 | 0.893 | 0.896 | 0.899 | 0.902 | 0.904 | 0.907 | 0.909 | 0.911 | 0.914 | 0.917 |       |       |
| Switzerland         | 0.773 | 0.778 |       |       |       |       |       |       |       |       |       |       |       |       |       |       |       |       |       |       |       |       |       |       |       |       |       |       |       |       |

| Location                      |       | 1990  | 1991   | 1992  | 1993  | 1994  | 1995  | 1996  | 1997  | 1998  | 1999  | 2000  | 2001  | 2002  | 2003  | 2004  | 2005  | 2006  | 2007  | 2008  | 2009  | 2010  | 2011  | 2012  | 2013  | 2014  | 2015  | 2016  | 2017  |
|-------------------------------|-------|-------|--------|-------|-------|-------|-------|-------|-------|-------|-------|-------|-------|-------|-------|-------|-------|-------|-------|-------|-------|-------|-------|-------|-------|-------|-------|-------|-------|
| St Helena                     | 0.084 | 0.091 | 0.096  | 0.103 | 0.109 | 0.113 | 0.116 | 0.122 | 0.125 | 0.131 | 0.138 | 0.144 | 0.149 | 0.153 | 0.156 | 0.159 | 0.162 | 0.165 | 0.168 | 0.171 | 0.174 | 0.179 | 0.185 | 0.191 | 0.195 | 0.198 | 0.201 | 0.203 |       |
| Slovenia                      | 0.727 | 0.734 | 0.741  | 0.748 | 0.754 | 0.759 | 0.763 | 0.767 | 0.772 | 0.779 | 0.786 | 0.791 | 0.796 | 0.799 | 0.803 | 0.806 | 0.809 | 0.812 | 0.814 | 0.817 | 0.821 | 0.823 | 0.825 | 0.827 | 0.829 | 0.831 | 0.833 | 0.835 | 0.837 |
| Tanzania                      | 0.691 | 0.697 | 0.703  | 0.711 | 0.716 | 0.721 | 0.724 | 0.728 | 0.734 | 0.74  | 0.746 | 0.751 | 0.755 | 0.758 | 0.76  | 0.762 | 0.763 | 0.764 | 0.766 | 0.768 | 0.77  | 0.774 | 0.778 | 0.783 | 0.788 | 0.793 | 0.798 | 0.803 | 0.807 |
| Turkmenistan                  | 0.751 | 0.757 | 0.764  | 0.771 | 0.778 | 0.782 | 0.786 | 0.79  | 0.795 | 0.802 | 0.809 | 0.815 | 0.82  | 0.824 | 0.829 | 0.832 | 0.836 | 0.839 | 0.842 | 0.844 | 0.848 | 0.852 | 0.856 | 0.86  | 0.864 | 0.868 | 0.872 | 0.876 | 0.879 |
| Uganda                        | 0.739 | 0.745 | 0.752  | 0.759 | 0.765 | 0.769 | 0.773 | 0.776 | 0.782 | 0.788 | 0.795 | 0.801 | 0.807 | 0.811 | 0.814 | 0.818 | 0.822 | 0.825 | 0.827 | 0.831 | 0.833 | 0.838 | 0.843 | 0.849 | 0.853 | 0.858 | 0.863 | 0.868 | 0.873 |
| Uzbekistan                    | 0.691 | 0.697 | 0.703  | 0.711 | 0.716 | 0.72  | 0.723 | 0.727 | 0.731 | 0.737 | 0.742 | 0.747 | 0.751 | 0.755 | 0.757 | 0.76  | 0.763 | 0.766 | 0.769 | 0.774 | 0.778 | 0.784 | 0.789 | 0.794 | 0.799 | 0.804 | 0.809 | 0.814 | 0.819 |
| Vietnam                       | 0.695 | 0.701 | 0.708  | 0.714 | 0.721 | 0.725 | 0.728 | 0.732 | 0.737 | 0.743 | 0.749 | 0.753 | 0.757 | 0.761 | 0.763 | 0.766 | 0.768 | 0.77  | 0.773 | 0.775 | 0.777 | 0.781 | 0.786 | 0.792 | 0.796 | 0.801 | 0.806 | 0.811 | 0.816 |
| South East Asia               | 0.749 | 0.755 | 0.762  | 0.767 | 0.773 | 0.777 | 0.781 | 0.784 | 0.789 | 0.795 | 0.801 | 0.806 | 0.809 | 0.812 | 0.815 | 0.818 | 0.821 | 0.823 | 0.825 | 0.827 | 0.831 | 0.834 | 0.838 | 0.841 | 0.844 | 0.847 | 0.851 | 0.854 | 0.857 |
| Brazil                        | 0.759 | 0.764 | 0.77   | 0.776 | 0.781 | 0.785 | 0.789 | 0.793 | 0.797 | 0.801 | 0.805 | 0.81  | 0.814 | 0.818 | 0.822 | 0.826 | 0.829 | 0.833 | 0.837 | 0.841 | 0.845 | 0.849 | 0.853 | 0.857 | 0.861 | 0.865 | 0.869 | 0.873 | 0.877 |
| Bhutan and Laos               | 0.766 | 0.772 | 0.779  | 0.785 | 0.791 | 0.796 | 0.801 | 0.806 | 0.811 | 0.816 | 0.822 | 0.827 | 0.833 | 0.838 | 0.843 | 0.847 | 0.851 | 0.855 | 0.859 | 0.863 | 0.867 | 0.871 | 0.875 | 0.879 | 0.883 | 0.887 | 0.891 | 0.895 | 0.899 |
| Banladesh                     | 0.764 | 0.769 | 0.775  | 0.782 | 0.788 | 0.792 | 0.795 | 0.799 | 0.804 | 0.81  | 0.815 | 0.82  | 0.824 | 0.828 | 0.832 | 0.836 | 0.839 | 0.843 | 0.847 | 0.851 | 0.855 | 0.859 | 0.863 | 0.867 | 0.871 | 0.875 | 0.879 | 0.883 | 0.887 |
| East Sussex                   | 0.744 | 0.75  | 0.754  | 0.758 | 0.762 | 0.766 | 0.77  | 0.774 | 0.778 | 0.782 | 0.786 | 0.79  | 0.794 | 0.798 | 0.802 | 0.806 | 0.81  | 0.814 | 0.818 | 0.822 | 0.826 | 0.83  | 0.834 | 0.838 | 0.842 | 0.846 | 0.85  | 0.854 | 0.858 |
| Hampshire                     | 0.712 | 0.718 | 0.724  | 0.73  | 0.736 | 0.74  | 0.742 | 0.745 | 0.749 | 0.754 | 0.759 | 0.763 | 0.766 | 0.769 | 0.771 | 0.773 | 0.776 | 0.778 | 0.781 | 0.783 | 0.787 | 0.791 | 0.795 | 0.801 | 0.807 | 0.813 | 0.819 | 0.825 | 0.831 |
| West of England               | 0.704 | 0.709 | 0.715  | 0.722 | 0.727 | 0.732 | 0.735 | 0.739 | 0.744 | 0.749 | 0.756 | 0.761 | 0.765 | 0.767 | 0.768 | 0.771 | 0.773 | 0.776 | 0.779 | 0.781 | 0.784 | 0.788 | 0.794 | 0.801 | 0.806 | 0.811 | 0.816 | 0.821 | 0.826 |
| Kent                          | 0.723 | 0.728 | 0.734  | 0.74  | 0.746 | 0.75  | 0.752 | 0.756 | 0.76  | 0.765 | 0.77  | 0.774 | 0.777 | 0.779 | 0.782 | 0.785 | 0.787 | 0.79  | 0.793 | 0.796 | 0.8   | 0.805 | 0.811 | 0.817 | 0.823 | 0.829 | 0.835 | 0.841 | 0.847 |
| Midway                        | 0.763 | 0.769 | 0.775  | 0.782 | 0.788 | 0.794 | 0.798 | 0.803 | 0.807 | 0.812 | 0.817 | 0.822 | 0.826 | 0.831 | 0.836 | 0.841 | 0.846 | 0.851 | 0.856 | 0.861 | 0.866 | 0.871 | 0.876 | 0.881 | 0.886 | 0.891 | 0.896 | 0.901 | 0.906 |
| Midland Keynes                | 0.754 | 0.76  | 0.767  | 0.774 | 0.78  | 0.784 | 0.788 | 0.793 | 0.797 | 0.802 | 0.806 | 0.81  | 0.815 | 0.819 | 0.823 | 0.827 | 0.831 | 0.835 | 0.839 | 0.843 | 0.847 | 0.851 | 0.855 | 0.859 | 0.863 | 0.867 | 0.871 | 0.875 | 0.879 |
| Oxfordshire                   | 0.769 | 0.775 | 0.781  | 0.788 | 0.794 | 0.798 | 0.803 | 0.808 | 0.813 | 0.818 | 0.823 | 0.828 | 0.833 | 0.838 | 0.843 | 0.848 | 0.853 | 0.858 | 0.863 | 0.868 | 0.873 | 0.878 | 0.883 | 0.888 | 0.893 | 0.898 | 0.903 | 0.908 | 0.913 |
| Portsmouth                    | 0.75  | 0.756 | 0.763  | 0.77  | 0.776 | 0.781 | 0.785 | 0.79  | 0.795 | 0.8   | 0.805 | 0.81  | 0.815 | 0.82  | 0.824 | 0.828 | 0.832 | 0.836 | 0.84  | 0.844 | 0.848 | 0.852 | 0.856 | 0.86  | 0.864 | 0.868 | 0.872 | 0.876 | 0.88  |
| Reading                       | 0.785 | 0.791 | 0.797  | 0.803 | 0.809 | 0.815 | 0.821 | 0.827 | 0.834 | 0.84  | 0.847 | 0.853 | 0.859 | 0.865 | 0.871 | 0.877 | 0.883 | 0.889 | 0.895 | 0.901 | 0.907 | 0.913 | 0.919 | 0.925 | 0.931 | 0.937 | 0.943 | 0.949 | 0.955 |
| Slovenia                      | 0.764 | 0.77  | 0.777  | 0.784 | 0.791 | 0.797 | 0.803 | 0.809 | 0.815 | 0.821 | 0.827 | 0.833 | 0.839 | 0.845 | 0.851 | 0.857 | 0.863 | 0.869 | 0.875 | 0.881 | 0.887 | 0.893 | 0.899 | 0.905 | 0.911 | 0.917 | 0.923 | 0.929 | 0.935 |
| Southampton                   | 0.752 | 0.758 | 0.765  | 0.772 | 0.779 | 0.784 | 0.789 | 0.794 | 0.798 | 0.803 | 0.808 | 0.813 | 0.818 | 0.823 | 0.828 | 0.833 | 0.838 | 0.843 | 0.848 | 0.853 | 0.858 | 0.863 | 0.868 | 0.873 | 0.878 | 0.883 | 0.888 | 0.893 | 0.898 |
| West Midlands                 | 0.781 | 0.787 | 0.793  | 0.799 | 0.805 | 0.811 | 0.817 | 0.823 | 0.829 | 0.835 | 0.841 | 0.847 | 0.853 | 0.859 | 0.865 | 0.871 | 0.877 | 0.883 | 0.889 | 0.895 | 0.901 | 0.907 | 0.913 | 0.919 | 0.925 | 0.931 | 0.937 | 0.943 | 0.949 |
| West Yorkshire                | 0.774 | 0.78  | 0.786  | 0.793 | 0.799 | 0.805 | 0.811 | 0.817 | 0.823 | 0.829 | 0.835 | 0.841 | 0.847 | 0.853 | 0.859 | 0.865 | 0.871 | 0.877 | 0.883 | 0.889 | 0.895 | 0.901 | 0.907 | 0.913 | 0.919 | 0.925 | 0.931 | 0.937 | 0.943 |
| West Sussex                   | 0.74  | 0.745 | 0.751  | 0.757 | 0.763 | 0.767 | 0.77  | 0.773 | 0.777 | 0.783 | 0.788 | 0.793 | 0.798 | 0.803 | 0.808 | 0.813 | 0.818 | 0.823 | 0.828 | 0.833 | 0.838 | 0.843 | 0.848 | 0.853 | 0.858 | 0.863 | 0.868 | 0.873 | 0.878 |
| Wiltshire and Maidenhead      | 0.778 | 0.783 | 0.789  | 0.795 | 0.8   | 0.805 | 0.811 | 0.816 | 0.821 | 0.826 | 0.831 | 0.836 | 0.841 | 0.846 | 0.851 | 0.856 | 0.861 | 0.866 | 0.871 | 0.876 | 0.881 | 0.886 | 0.891 | 0.896 | 0.901 | 0.906 | 0.911 | 0.916 | 0.921 |
| Wokingham                     | 0.778 | 0.784 | 0.79   | 0.797 | 0.802 | 0.806 | 0.81  | 0.814 | 0.818 | 0.822 | 0.826 | 0.83  | 0.834 | 0.838 | 0.842 | 0.846 | 0.85  | 0.854 | 0.858 | 0.862 | 0.866 | 0.87  | 0.874 | 0.878 | 0.882 | 0.886 | 0.89  | 0.894 | 0.898 |
| South West England            | 0.729 | 0.735 | 0.741  | 0.748 | 0.754 | 0.758 | 0.762 | 0.766 | 0.771 | 0.777 | 0.783 | 0.788 | 0.792 | 0.796 | 0.799 | 0.802 | 0.805 | 0.808 | 0.811 | 0.814 | 0.817 | 0.82  | 0.823 | 0.826 | 0.829 | 0.832 | 0.835 | 0.838 | 0.841 |
| North and North East Somerset | 0.752 | 0.758 | 0.764  | 0.77  | 0.777 | 0.782 | 0.786 | 0.79  | 0.796 | 0.803 | 0.809 | 0.816 | 0.822 | 0.828 | 0.833 | 0.838 | 0.843 | 0.848 | 0.853 | 0.858 | 0.863 | 0.868 | 0.873 | 0.878 | 0.883 | 0.888 | 0.893 | 0.898 | 0.903 |
| Bournemouth                   | 0.736 | 0.743 | 0.75   | 0.757 | 0.763 | 0.768 | 0.773 | 0.778 | 0.784 | 0.79  | 0.797 | 0.803 | 0.809 | 0.815 | 0.821 | 0.826 | 0.831 | 0.836 | 0.841 | 0.846 | 0.851 | 0.856 | 0.861 | 0.866 | 0.871 | 0.876 | 0.881 | 0.886 | 0.891 |
| Bedford City                  | 0.737 | 0.743 | 0.749  | 0.755 | 0.761 | 0.767 | 0.773 | 0.779 | 0.785 | 0.791 | 0.797 | 0.803 | 0.809 | 0.815 | 0.821 | 0.827 | 0.833 | 0.839 | 0.845 | 0.851 | 0.857 | 0.863 | 0.869 | 0.875 | 0.881 | 0.887 | 0.893 | 0.899 | 0.905 |
| Corwall                       | 0.7   | 0.706 | 0.713  | 0.721 | 0.727 | 0.733 | 0.739 | 0.745 | 0.751 | 0.757 | 0.763 | 0.769 | 0.775 | 0.781 | 0.787 | 0.793 | 0.799 | 0.805 | 0.811 | 0.817 | 0.823 | 0.829 | 0.835 | 0.841 | 0.847 | 0.853 | 0.859 | 0.865 | 0.871 |
| Devon                         | 0.72  | 0.726 | 0.733  | 0.74  | 0.746 | 0.75  | 0.753 | 0.757 | 0.762 | 0.769 | 0.775 | 0.78  | 0.785 | 0.789 | 0.793 | 0.796 | 0.8   | 0.803 | 0.806 | 0.809 | 0.812 | 0.815 | 0.818 | 0.821 | 0.824 | 0.827 | 0.83  | 0.833 | 0.837 |
| Donet                         | 0.716 | 0.722 | 0.729  | 0.734 | 0.74  | 0.744 | 0.747 | 0.751 | 0.756 | 0.762 | 0.769 | 0.773 | 0.777 | 0.781 | 0.785 | 0.789 | 0.793 | 0.797 | 0.801 | 0.805 | 0.809 | 0.813 | 0.817 | 0.821 | 0.825 | 0.829 | 0.833 | 0.837 | 0.841 |
| Gloucestershire               | 0.735 | 0.741 | 0.747  | 0.754 | 0.76  | 0.765 | 0.768 | 0.772 | 0.777 | 0.783 | 0.79  | 0.795 | 0.8   | 0.804 | 0.808 | 0.812 | 0.816 | 0.82  | 0.824 | 0.828 | 0.832 | 0.836 | 0.84  | 0.844 | 0.848 | 0.852 | 0.856 | 0.86  | 0.864 |
| North Somerset                | 0.714 | 0.72  | 0.727  | 0.733 | 0.739 | 0.743 | 0.746 | 0.75  | 0.755 | 0.76  | 0.766 | 0.771 | 0.776 | 0.78  | 0.783 | 0.786 | 0.789 | 0.792 | 0.795 | 0.798 | 0.801 | 0.804 | 0.807 | 0.81  | 0.813 | 0.816 | 0.819 | 0.822 | 0.825 |
| Plymouth                      | 0.724 | 0.731 | 0.737  | 0.744 | 0.75  | 0.754 | 0.758 | 0.762 | 0.767 | 0.772 | 0.778 | 0.783 | 0.787 | 0.79  | 0.793 | 0.796 | 0.799 | 0.802 | 0.805 | 0.808 | 0.811 | 0.814 | 0.817 | 0.82  | 0.823 | 0.826 | 0.829 | 0.832 | 0.835 |
| Poole                         | 0.727 | 0.733 | 0.74   | 0.746 | 0.752 | 0.758 | 0.764 | 0.77  | 0.776 | 0.782 | 0.788 | 0.794 | 0.799 | 0.805 | 0.811 | 0.817 | 0.823 | 0.829 | 0.835 | 0.841 | 0.847 | 0.853 | 0.859 | 0.865 | 0.871 | 0.877 | 0.883 | 0.889 | 0.895 |
| Somerset                      | 0.713 | 0.718 | 0.724  | 0.731 | 0.737 | 0.743 | 0.748 | 0.752 | 0.757 | 0.763 | 0.768 | 0.773 | 0.778 | 0.783 | 0.788 | 0.793 | 0.798 | 0.803 | 0.808 | 0.813 | 0.818 | 0.823 | 0.828 | 0.833 | 0.838 | 0.843 | 0.848 | 0.853 | 0.858 |
| South Gloucestershire         | 0.747 | 0.752 | 0.758  | 0.765 | 0.771 | 0.775 | 0.779 | 0.783 | 0.789 | 0.796 | 0.802 | 0.808 | 0.813 | 0.818 | 0.823 | 0.828 | 0.833 | 0.838 | 0.843 | 0.848 | 0.853 | 0.858 | 0.863 | 0.868 | 0.873 | 0.878 | 0.883 | 0.888 | 0.893 |
| Swindon                       | 0.747 | 0.753 | 0.76</ |       |       |       |       |       |       |       |       |       |       |       |       |       |       |       |       |       |       |       |       |       |       |       |       |       |       |

Appendix Table 10. Socio-Demographic Index values for all estimated GBD 2017 locations, 1990-2017

| Location                         | 1990  | 1991  | 1992  | 1993  | 1994  | 1995  | 1996  | 1997  | 1998  | 1999  | 2000  | 2001  | 2002  | 2003  | 2004  | 2005  | 2006  | 2007  | 2008  | 2009  | 2010  | 2011  | 2012  | 2013  | 2014  | 2015  | 2016  | 2017  |
|----------------------------------|-------|-------|-------|-------|-------|-------|-------|-------|-------|-------|-------|-------|-------|-------|-------|-------|-------|-------|-------|-------|-------|-------|-------|-------|-------|-------|-------|-------|
| Quintana Roo                     | 0.57  | 0.526 | 0.533 | 0.541 | 0.548 | 0.555 | 0.562 | 0.571 | 0.577 | 0.582 | 0.587 | 0.591 | 0.594 | 0.596 | 0.599 | 0.601 | 0.605 | 0.608 | 0.612 | 0.614 | 0.616 | 0.618 | 0.622 | 0.621 | 0.623 | 0.624 | 0.625 | 0.626 |
| San Luis Potosi                  | 0.482 | 0.514 | 0.521 | 0.528 | 0.534 | 0.541 | 0.547 | 0.553 | 0.559 | 0.564 | 0.569 | 0.573 | 0.578 | 0.582 | 0.586 | 0.590 | 0.593 | 0.596 | 0.599 | 0.602 | 0.605 | 0.608 | 0.611 | 0.614 | 0.617 | 0.619 | 0.621 | 0.623 |
| Sinaloa                          | 0.523 | 0.528 | 0.533 | 0.539 | 0.544 | 0.549 | 0.555 | 0.562 | 0.571 | 0.577 | 0.583 | 0.589 | 0.594 | 0.599 | 0.604 | 0.609 | 0.614 | 0.619 | 0.623 | 0.627 | 0.633 | 0.633 | 0.636 | 0.639 | 0.642 | 0.644 | 0.646 | 0.648 |
| Sonora                           | 0.553 | 0.557 | 0.562 | 0.566 | 0.571 | 0.575 | 0.578 | 0.583 | 0.588 | 0.593 | 0.597 | 0.601 | 0.605 | 0.608 | 0.612 | 0.616 | 0.621 | 0.625 | 0.629 | 0.632 | 0.637 | 0.641 | 0.643 | 0.645 | 0.647 | 0.649 | 0.651 | 0.653 |
| Tabasco                          | 0.474 | 0.477 | 0.486 | 0.493 | 0.5   | 0.507 | 0.515 | 0.524 | 0.533 | 0.541 | 0.548 | 0.553 | 0.558 | 0.563 | 0.568 | 0.573 | 0.578 | 0.583 | 0.588 | 0.591 | 0.594 | 0.596 | 0.599 | 0.602 | 0.604 | 0.607 | 0.609 | 0.611 |
| Tamaulipas                       | 0.548 | 0.553 | 0.558 | 0.564 | 0.568 | 0.571 | 0.574 | 0.579 | 0.586 | 0.592 | 0.598 | 0.602 | 0.606 | 0.609 | 0.613 | 0.616 | 0.62  | 0.624 | 0.628 | 0.631 | 0.633 | 0.635 | 0.637 | 0.64  | 0.642 | 0.643 | 0.645 | 0.647 |
| Tlaxcala                         | 0.478 | 0.482 | 0.487 | 0.495 | 0.506 | 0.515 | 0.524 | 0.531 | 0.536 | 0.541 | 0.547 | 0.553 | 0.558 | 0.563 | 0.567 | 0.571 | 0.575 | 0.578 | 0.583 | 0.587 | 0.591 | 0.594 | 0.596 | 0.598 | 0.6   | 0.601 | 0.603 | 0.604 |
| Venezuela de Ignacio de la Llave | 0.461 | 0.463 | 0.467 | 0.472 | 0.477 | 0.48  | 0.485 | 0.492 | 0.495 | 0.5   | 0.509 | 0.517 | 0.523 | 0.529 | 0.534 | 0.54  | 0.546 | 0.551 | 0.557 | 0.563 | 0.569 | 0.571 | 0.574 | 0.576 | 0.581 | 0.584 | 0.587 | 0.591 |
| Yucatán                          | 0.497 | 0.508 | 0.516 | 0.523 | 0.531 | 0.539 | 0.547 | 0.554 | 0.562 | 0.569 | 0.576 | 0.583 | 0.589 | 0.595 | 0.601 | 0.607 | 0.613 | 0.619 | 0.625 | 0.631 | 0.637 | 0.643 | 0.649 | 0.655 | 0.661 | 0.667 | 0.673 | 0.679 |
| Zacatecas                        | 0.483 | 0.489 | 0.495 | 0.502 | 0.509 | 0.514 | 0.52  | 0.527 | 0.534 | 0.54  | 0.546 | 0.551 | 0.555 | 0.56  | 0.564 | 0.568 | 0.572 | 0.577 | 0.581 | 0.584 | 0.586 | 0.589 | 0.592 | 0.595 | 0.598 | 0.602 | 0.605 | 0.608 |
| Nicaragua                        | 0.537 | 0.543 | 0.549 | 0.554 | 0.56  | 0.565 | 0.57  | 0.575 | 0.581 | 0.586 | 0.591 | 0.596 | 0.601 | 0.606 | 0.611 | 0.616 | 0.621 | 0.626 | 0.631 | 0.636 | 0.641 | 0.646 | 0.651 | 0.656 | 0.661 | 0.666 | 0.671 | 0.676 |
| Panamá                           | 0.542 | 0.546 | 0.55  | 0.555 | 0.56  | 0.565 | 0.569 | 0.573 | 0.578 | 0.583 | 0.589 | 0.595 | 0.6   | 0.604 | 0.608 | 0.611 | 0.614 | 0.618 | 0.622 | 0.626 | 0.63  | 0.635 | 0.641 | 0.646 | 0.651 | 0.656 | 0.661 | 0.667 |
| Venezuela                        | 0.528 | 0.536 | 0.543 | 0.55  | 0.558 | 0.566 | 0.574 | 0.582 | 0.591 | 0.597 | 0.602 | 0.608 | 0.614 | 0.621 | 0.628 | 0.635 | 0.642 | 0.649 | 0.656 | 0.663 | 0.67  | 0.678 | 0.684 | 0.691 | 0.698 | 0.705 | 0.712 | 0.719 |
| Tropical Latin America           | 0.494 | 0.5   | 0.507 | 0.514 | 0.521 | 0.529 | 0.537 | 0.544 | 0.553 | 0.558 | 0.564 | 0.571 | 0.577 | 0.582 | 0.588 | 0.594 | 0.601 | 0.608 | 0.614 | 0.621 | 0.628 | 0.635 | 0.642 | 0.649 | 0.656 | 0.663 | 0.67  | 0.676 |
| Brazil                           | 0.494 | 0.501 | 0.508 | 0.515 | 0.522 | 0.53  | 0.537 | 0.545 | 0.551 | 0.556 | 0.562 | 0.567 | 0.572 | 0.577 | 0.583 | 0.589 | 0.595 | 0.602 | 0.608 | 0.615 | 0.622 | 0.629 | 0.636 | 0.643 | 0.649 | 0.655 | 0.66  | 0.665 |
| Aceh                             | 0.376 | 0.386 | 0.395 | 0.405 | 0.415 | 0.424 | 0.433 | 0.442 | 0.451 | 0.46  | 0.466 | 0.472 | 0.479 | 0.485 | 0.492 | 0.5   | 0.508 | 0.517 | 0.527 | 0.536 | 0.546 | 0.556 | 0.565 | 0.575 | 0.585 | 0.595 | 0.605 | 0.615 |
| Alagoas                          | 0.355 | 0.363 | 0.371 | 0.379 | 0.387 | 0.395 | 0.404 | 0.412 | 0.419 | 0.425 | 0.431 | 0.436 | 0.442 | 0.448 | 0.455 | 0.462 | 0.47  | 0.478 | 0.487 | 0.496 | 0.505 | 0.514 | 0.523 | 0.531 | 0.539 | 0.546 | 0.552 | 0.556 |
| Amapá                            | 0.467 | 0.473 | 0.483 | 0.491 | 0.5   | 0.508 | 0.517 | 0.526 | 0.534 | 0.54  | 0.546 | 0.552 | 0.558 | 0.564 | 0.57  | 0.576 | 0.583 | 0.591 | 0.598 | 0.605 | 0.613 | 0.621 | 0.629 | 0.636 | 0.643 | 0.65  | 0.655 | 0.659 |
| Amazonas                         | 0.438 | 0.447 | 0.457 | 0.466 | 0.475 | 0.483 | 0.492 | 0.499 | 0.505 | 0.51  | 0.514 | 0.519 | 0.523 | 0.528 | 0.533 | 0.539 | 0.546 | 0.553 | 0.561 | 0.568 | 0.577 | 0.585 | 0.594 | 0.602 | 0.611 | 0.618 | 0.625 | 0.629 |
| Bahia                            | 0.402 | 0.41  | 0.419 | 0.427 | 0.435 | 0.443 | 0.451 | 0.459 | 0.465 | 0.47  | 0.475 | 0.48  | 0.485 | 0.491 | 0.496 | 0.503 | 0.51  | 0.518 | 0.526 | 0.534 | 0.542 | 0.551 | 0.559 | 0.567 | 0.575 | 0.582 | 0.587 | 0.591 |
| Ceará                            | 0.411 | 0.419 | 0.426 | 0.433 | 0.44  | 0.448 | 0.455 | 0.463 | 0.469 | 0.475 | 0.48  | 0.486 | 0.492 | 0.498 | 0.505 | 0.512 | 0.52  | 0.528 | 0.536 | 0.544 | 0.553 | 0.561 | 0.569 | 0.577 | 0.584 | 0.591 | 0.596 | 0.6   |
| Distrito Federal                 | 0.63  | 0.636 | 0.642 | 0.649 | 0.656 | 0.663 | 0.671 | 0.679 | 0.685 | 0.691 | 0.696 | 0.702 | 0.707 | 0.713 | 0.719 | 0.725 | 0.731 | 0.738 | 0.744 | 0.751 | 0.756 | 0.763 | 0.769 | 0.775 | 0.781 | 0.787 | 0.793 | 0.792 |
| Espírito Santo                   | 0.466 | 0.47  | 0.476 | 0.483 | 0.49  | 0.497 | 0.504 | 0.511 | 0.518 | 0.525 | 0.532 | 0.538 | 0.545 | 0.551 | 0.558 | 0.564 | 0.571 | 0.579 | 0.586 | 0.594 | 0.601 | 0.608 | 0.616 | 0.623 | 0.631 | 0.638 | 0.645 | 0.652 |
| Goiás                            | 0.466 | 0.469 | 0.476 | 0.484 | 0.492 | 0.501 | 0.51  | 0.518 | 0.526 | 0.532 | 0.538 | 0.545 | 0.551 | 0.558 | 0.564 | 0.571 | 0.579 | 0.586 | 0.594 | 0.601 | 0.608 | 0.616 | 0.623 | 0.631 | 0.638 | 0.645 | 0.652 | 0.659 |
| Maranhão                         | 0.313 | 0.322 | 0.33  | 0.339 | 0.347 | 0.355 | 0.364 | 0.371 | 0.377 | 0.383 | 0.388 | 0.393 | 0.398 | 0.402 | 0.409 | 0.418 | 0.427 | 0.436 | 0.446 | 0.456 | 0.466 | 0.477 | 0.488 | 0.499 | 0.51  | 0.52  | 0.525 | 0.53  |
| Mato Grosso                      | 0.475 | 0.484 | 0.492 | 0.501 | 0.509 | 0.518 | 0.527 | 0.535 | 0.543 | 0.548 | 0.554 | 0.559 | 0.564 | 0.57  | 0.576 | 0.582 | 0.589 | 0.596 | 0.604 | 0.611 | 0.618 | 0.626 | 0.633 | 0.641 | 0.648 | 0.654 | 0.659 | 0.662 |
| Mato Grosso do Sul               | 0.465 | 0.473 | 0.481 | 0.489 | 0.497 | 0.506 | 0.515 | 0.523 | 0.531 | 0.537 | 0.543 | 0.549 | 0.555 | 0.56  | 0.566 | 0.573 | 0.58  | 0.587 | 0.594 | 0.6   | 0.607 | 0.614 | 0.622 | 0.629 | 0.636 | 0.642 | 0.647 | 0.651 |
| Minas Gerais                     | 0.491 | 0.498 | 0.506 | 0.513 | 0.521 | 0.53  | 0.538 | 0.545 | 0.551 | 0.557 | 0.562 | 0.567 | 0.573 | 0.579 | 0.585 | 0.591 | 0.598 | 0.604 | 0.611 | 0.618 | 0.624 | 0.631 | 0.637 | 0.643 | 0.649 | 0.654 | 0.658 | 0.661 |
| Pernambuco                       | 0.41  | 0.418 | 0.425 | 0.432 | 0.44  | 0.447 | 0.454 | 0.461 | 0.466 | 0.47  | 0.473 | 0.476 | 0.48  | 0.483 | 0.488 | 0.493 | 0.498 | 0.506 | 0.514 | 0.521 | 0.529 | 0.538 | 0.546 | 0.554 | 0.562 | 0.569 | 0.575 | 0.579 |
| Paraná                           | 0.399 | 0.406 | 0.413 | 0.42  | 0.427 | 0.434 | 0.441 | 0.447 | 0.453 | 0.457 | 0.461 | 0.465 | 0.469 | 0.474 | 0.48  | 0.486 | 0.493 | 0.501 | 0.509 | 0.517 | 0.526 | 0.535 | 0.543 | 0.551 | 0.559 | 0.566 | 0.571 | 0.574 |
| Piauí                            | 0.416 | 0.423 | 0.43  | 0.437 | 0.444 | 0.451 | 0.458 | 0.466 | 0.472 | 0.477 | 0.481 | 0.486 | 0.492 | 0.497 | 0.503 | 0.51  | 0.517 | 0.523 | 0.53  | 0.538 | 0.546 | 0.554 | 0.562 | 0.57  | 0.579 | 0.585 | 0.591 | 0.594 |
| Rio de Janeiro                   | 0.576 | 0.582 | 0.588 | 0.59  | 0.593 | 0.601 | 0.608 | 0.614 | 0.619 | 0.624 | 0.628 | 0.632 | 0.637 | 0.641 | 0.645 | 0.65  | 0.655 | 0.66  | 0.665 | 0.67  | 0.675 | 0.681 | 0.686 | 0.692 | 0.697 | 0.702 | 0.708 | 0.709 |
| Rio Grande do Norte              | 0.415 | 0.422 | 0.429 | 0.436 | 0.444 | 0.451 | 0.46  | 0.467 | 0.474 | 0.48  | 0.485 | 0.491 | 0.497 | 0.503 | 0.509 | 0.516 | 0.524 | 0.532 | 0.541 | 0.549 | 0.558 | 0.567 | 0.575 | 0.583 | 0.591 | 0.597 | 0.602 | 0.605 |
| Rio Grande do Sul                | 0.543 | 0.549 | 0.555 | 0.561 | 0.567 | 0.574 | 0.581 | 0.587 | 0.593 | 0.598 | 0.603 | 0.608 | 0.614 | 0.619 | 0.624 | 0.63  | 0.635 | 0.641 | 0.647 | 0.653 | 0.659 | 0.665 | 0.671 | 0.678 | 0.685 | 0.691 | 0.696 | 0.699 |
| Roraima                          | 0.423 | 0.433 | 0.441 | 0.45  | 0.458 | 0.467 | 0.475 | 0.484 | 0.491 | 0.497 | 0.502 | 0.508 | 0.515 | 0.521 | 0.528 | 0.535 | 0.543 | 0.551 | 0.559 | 0.567 | 0.575 | 0.584 | 0.592 | 0.599 | 0.606 | 0.613 | 0.618 | 0.622 |
| Roraima                          | 0.428 | 0.438 | 0.446 | 0.455 | 0.463 | 0.472 | 0.481 | 0.49  | 0.498 | 0.507 | 0.516 | 0.525 | 0.534 | 0.543 | 0.552 | 0.561 | 0.57  | 0.58  | 0.59  | 0.6   | 0.61  | 0.62  | 0.63  | 0.64  | 0.65  | 0.66  | 0.67  | 0.68  |
| Santa Catarina                   | 0.541 | 0.545 | 0.554 | 0.56  | 0.567 | 0.574 | 0.582 | 0.589 | 0.595 | 0.601 | 0.606 | 0.612 | 0.618 | 0.623 | 0.629 | 0.635 | 0.641 | 0.647 | 0.653 | 0.659 | 0.665 | 0.672 | 0.678 | 0.684 | 0.69  | 0.695 | 0.699 | 0.702 |
| São Paulo                        | 0.558 | 0.565 | 0.572 | 0.579 | 0.587 | 0.595 | 0.603 | 0.611 | 0.618 | 0.624 | 0.63  | 0.636 | 0.641 | 0.646 | 0.652 | 0.657 | 0.663 | 0.669 | 0.674 | 0.68  | 0.685 | 0.691 | 0.697 | 0.703 | 0.708 | 0.713 | 0.717 | 0.72  |
| Sergipe                          | 0.425 | 0.433 | 0.441 | 0.448 | 0.456 | 0.464 | 0.473 | 0.481 | 0.488 | 0.494 | 0.5   | 0.506 | 0.512 | 0.518 | 0.524 | 0.531 | 0.538 | 0.546 | 0.554 | 0.562 | 0.57  | 0.578 | 0.586 | 0.594 | 0.601 | 0.607 | 0.612 | 0.616 |
| Tocantins                        | 0.396 | 0.404 | 0.412 | 0.42  | 0.428 | 0.436 | 0.445 | 0.454 | 0.46  | 0.466 | 0.471 | 0.477 | 0.484 | 0.491 | 0.498 | 0.507 | 0.517 | 0.527 | 0.537 | 0.547 | 0.558 | 0.568 | 0.578 | 0.588 | 0.594 | 0.601 | 0.607 | 0.611 |
| Paraguay                         | 0.467 | 0.471 | 0.475 | 0.48  | 0.485 | 0.491 | 0.497 | 0.504 | 0.512 | 0.519 | 0.525 | 0.532 | 0.538 | 0.544 | 0.548 | 0.553 | 0.558 | 0.562 | 0.566 | 0.569 | 0.573 | 0.577 | 0.582 | 0.588 | 0.594 | 0.601 | 0.607 | 0.611 |
| North Africa and Middle East     | 0.456 | 0.464 | 0.472 | 0.478 | 0.485 | 0.492 | 0.499 | 0.506 | 0.513 |       |       |       |       |       |       |       |       |       |       |       |       |       |       |       |       |       |       |       |

Appendix Table 10. Socio-Demographic Index values for all estimated GBD 2017 locations, 1990-2017

| Location                   | 1990  | 1991  | 1992  | 1993  | 1994  | 1995  | 1996  | 1997  | 1998  | 1999  | 2000  | 2001  | 2002  | 2003  | 2004  | 2005  | 2006  | 2007  | 2008  | 2009  | 2010  | 2011  | 2012  | 2013  | 2014  | 2015  | 2016  | 2017  |
|----------------------------|-------|-------|-------|-------|-------|-------|-------|-------|-------|-------|-------|-------|-------|-------|-------|-------|-------|-------|-------|-------|-------|-------|-------|-------|-------|-------|-------|-------|
| Philippines                | 0.511 | 0.516 | 0.521 | 0.525 | 0.531 | 0.534 | 0.539 | 0.542 | 0.545 | 0.547 | 0.551 | 0.553 | 0.555 | 0.557 | 0.559 | 0.561 | 0.563 | 0.566 | 0.568 | 0.569 | 0.572 | 0.579 | 0.586 | 0.593 | 0.599 | 0.605 | 0.612 | 0.617 |
| Si Lanka                   | 0.49  | 0.495 | 0.501 | 0.508 | 0.516 | 0.524 | 0.532 | 0.54  | 0.547 | 0.552 | 0.559 | 0.565 | 0.571 | 0.578 | 0.584 | 0.59  | 0.597 | 0.604 | 0.611 | 0.616 | 0.624 | 0.631 | 0.638 | 0.645 | 0.652 | 0.659 | 0.667 | 0.673 |
| Seychelles                 | 0.549 | 0.557 | 0.565 | 0.573 | 0.582 | 0.589 | 0.597 | 0.605 | 0.613 | 0.62  | 0.626 | 0.631 | 0.636 | 0.64  | 0.643 | 0.646 | 0.65  | 0.653 | 0.656 | 0.658 | 0.661 | 0.663 | 0.667 | 0.671 | 0.675 | 0.68  | 0.686 | 0.692 |
| Thailand                   | 0.502 | 0.514 | 0.525 | 0.534 | 0.542 | 0.552 | 0.561 | 0.567 | 0.569 | 0.572 | 0.579 | 0.587 | 0.594 | 0.6   | 0.605 | 0.61  | 0.616 | 0.623 | 0.629 | 0.635 | 0.641 | 0.647 | 0.654 | 0.661 | 0.667 | 0.673 | 0.679 | 0.684 |
| Timor-Leste                | 0.276 | 0.283 | 0.29  | 0.296 | 0.302 | 0.307 | 0.314 | 0.321 | 0.325 | 0.321 | 0.32  | 0.325 | 0.332 | 0.345 | 0.362 | 0.379 | 0.4   | 0.419 | 0.437 | 0.449 | 0.46  | 0.471 | 0.481 | 0.49  | 0.495 | 0.5   | 0.504 | 0.505 |
| Vietnam                    | 0.406 | 0.413 | 0.42  | 0.427 | 0.435 | 0.444 | 0.452 | 0.461 | 0.469 | 0.477 | 0.483 | 0.49  | 0.497 | 0.504 | 0.511 | 0.518 | 0.525 | 0.532 | 0.54  | 0.547 | 0.554 | 0.562 | 0.57  | 0.578 | 0.585 | 0.593 | 0.6   | 0.607 |
| Sub-Saharan Africa         | 0.304 | 0.307 | 0.311 | 0.314 | 0.317 | 0.32  | 0.324 | 0.328 | 0.332 | 0.335 | 0.339 | 0.343 | 0.348 | 0.353 | 0.359 | 0.365 | 0.371 | 0.379 | 0.386 | 0.393 | 0.4   | 0.407 | 0.414 | 0.421 | 0.428 | 0.435 | 0.441 | 0.446 |
| Central sub-Saharan Africa | 0.298 | 0.301 | 0.307 | 0.309 | 0.311 | 0.313 | 0.316 | 0.318 | 0.32  | 0.323 | 0.325 | 0.328 | 0.332 | 0.336 | 0.341 | 0.348 | 0.355 | 0.364 | 0.373 | 0.382 | 0.391 | 0.402 | 0.413 | 0.423 | 0.433 | 0.443 | 0.452 | 0.457 |
| Angola                     | 0.235 | 0.241 | 0.245 | 0.249 | 0.253 | 0.258 | 0.263 | 0.269 | 0.274 | 0.28  | 0.286 | 0.293 | 0.299 | 0.305 | 0.312 | 0.32  | 0.328 | 0.334 | 0.341 | 0.348 | 0.355 | 0.363 | 0.371 | 0.379 | 0.387 | 0.395 | 0.403 | 0.41  |
| Central African Republic   | 0.22  | 0.225 | 0.228 | 0.232 | 0.236 | 0.24  | 0.242 | 0.245 | 0.249 | 0.254 | 0.257 | 0.261 | 0.266 | 0.271 | 0.275 | 0.28  | 0.285 | 0.29  | 0.296 | 0.304 | 0.313 | 0.323 | 0.335 | 0.348 | 0.363 | 0.378 | 0.393 | 0.404 |
| Congo (Brazzaville)        | 0.382 | 0.39  | 0.398 | 0.405 | 0.41  | 0.416 | 0.421 | 0.426 | 0.43  | 0.434 | 0.439 | 0.444 | 0.449 | 0.455 | 0.46  | 0.467 | 0.475 | 0.482 | 0.49  | 0.499 | 0.509 | 0.52  | 0.531 | 0.542 | 0.552 | 0.561 | 0.569 | 0.574 |
| DR Congo                   | 0.293 | 0.296 | 0.298 | 0.298 | 0.296 | 0.294 | 0.291 | 0.288 | 0.283 | 0.279 | 0.274 | 0.269 | 0.263 | 0.263 | 0.262 | 0.264 | 0.264 | 0.265 | 0.267 | 0.27  | 0.278 | 0.288 | 0.3   | 0.315 | 0.33  | 0.344 | 0.356 | 0.364 |
| Equatorial Guinea          | 0.2   | 0.204 | 0.212 | 0.22  | 0.229 | 0.241 | 0.26  | 0.292 | 0.316 | 0.339 | 0.363 | 0.388 | 0.41  | 0.429 | 0.449 | 0.467 | 0.483 | 0.499 | 0.516 | 0.537 | 0.568 | 0.599 | 0.631 | 0.662 | 0.693 | 0.724 | 0.755 | 0.786 |
| Gabon                      | 0.433 | 0.443 | 0.453 | 0.462 | 0.472 | 0.481 | 0.49  | 0.498 | 0.506 | 0.514 | 0.522 | 0.529 | 0.535 | 0.542 | 0.549 | 0.556 | 0.562 | 0.569 | 0.576 | 0.582 | 0.589 | 0.598 | 0.607 | 0.616 | 0.625 | 0.634 | 0.641 | 0.651 |
| Eastern sub-Saharan Africa | 0.23  | 0.233 | 0.236 | 0.239 | 0.241 | 0.245 | 0.249 | 0.254 | 0.259 | 0.262 | 0.266 | 0.271 | 0.276 | 0.282 | 0.288 | 0.294 | 0.301 | 0.308 | 0.316 | 0.324 | 0.332 | 0.34  | 0.348 | 0.356 | 0.365 | 0.373 | 0.381 | 0.387 |
| Burundi                    | 0.237 | 0.252 | 0.257 | 0.258 | 0.255 | 0.255 | 0.265 | 0.266 | 0.268 | 0.268 | 0.268 | 0.267 | 0.268 | 0.269 | 0.271 | 0.272 | 0.274 | 0.276 | 0.278 | 0.282 | 0.286 | 0.29  | 0.295 | 0.299 | 0.303 | 0.306 | 0.308 | 0.31  |
| Comoros                    | 0.272 | 0.279 | 0.286 | 0.293 | 0.298 | 0.303 | 0.306 | 0.31  | 0.314 | 0.319 | 0.325 | 0.331 | 0.338 | 0.344 | 0.351 | 0.358 | 0.365 | 0.372 | 0.378 | 0.384 | 0.39  | 0.396 | 0.403 | 0.411 | 0.417 | 0.423 | 0.429 | 0.434 |
| Djibouti                   | 0.313 | 0.317 | 0.322 | 0.322 | 0.329 | 0.333 | 0.337 | 0.341 | 0.345 | 0.349 | 0.354 | 0.359 | 0.364 | 0.37  | 0.376 | 0.381 | 0.386 | 0.391 | 0.396 | 0.401 | 0.406 | 0.411 | 0.416 | 0.421 | 0.426 | 0.431 | 0.436 | 0.441 |
| Eritrea                    | 0.202 | 0.214 | 0.223 | 0.234 | 0.247 | 0.26  | 0.272 | 0.285 | 0.296 | 0.306 | 0.315 | 0.323 | 0.331 | 0.337 | 0.343 | 0.348 | 0.353 | 0.357 | 0.36  | 0.364 | 0.368 | 0.372 | 0.378 | 0.383 | 0.39  | 0.396 | 0.403 | 0.409 |
| Ethiopia                   | 0.138 | 0.141 | 0.143 | 0.146 | 0.148 | 0.15  | 0.155 | 0.161 | 0.166 | 0.169 | 0.172 | 0.177 | 0.183 | 0.189 | 0.195 | 0.202 | 0.21  | 0.221 | 0.233 | 0.245 | 0.257 | 0.268 | 0.28  | 0.292 | 0.303 | 0.314 | 0.325 | 0.334 |
| Kenya                      | 0.341 | 0.349 | 0.357 | 0.364 | 0.372 | 0.377 | 0.382 | 0.387 | 0.392 | 0.398 | 0.401 | 0.403 | 0.406 | 0.411 | 0.416 | 0.42  | 0.425 | 0.432 | 0.438 | 0.445 | 0.452 | 0.459 | 0.465 | 0.473 | 0.481 | 0.488 | 0.494 | 0.499 |
| Rwanda                     | 0.254 | 0.266 | 0.278 | 0.289 | 0.299 | 0.307 | 0.313 | 0.319 | 0.326 | 0.333 | 0.338 | 0.343 | 0.347 | 0.352 | 0.358 | 0.362 | 0.366 | 0.37  | 0.374 | 0.379 | 0.384 | 0.389 | 0.394 | 0.401 | 0.408 | 0.414 | 0.421 | 0.428 |
| Burkina Faso               | 0.206 | 0.211 | 0.216 | 0.22  | 0.225 | 0.23  | 0.235 | 0.24  | 0.245 | 0.25  | 0.255 | 0.26  | 0.265 | 0.27  | 0.275 | 0.28  | 0.285 | 0.29  | 0.295 | 0.301 | 0.307 | 0.313 | 0.319 | 0.325 | 0.331 | 0.337 | 0.343 | 0.349 |
| Burkina Faso               | 0.216 | 0.225 | 0.233 | 0.241 | 0.248 | 0.253 | 0.257 | 0.26  | 0.265 | 0.27  | 0.275 | 0.28  | 0.285 | 0.29  | 0.295 | 0.301 | 0.307 | 0.313 | 0.319 | 0.325 | 0.331 | 0.337 | 0.343 | 0.349 | 0.355 | 0.361 | 0.367 | 0.373 |
| Burkina Faso               | 0.206 | 0.211 | 0.216 | 0.22  | 0.225 | 0.23  | 0.235 | 0.24  | 0.245 | 0.25  | 0.255 | 0.26  | 0.265 | 0.27  | 0.275 | 0.28  | 0.285 | 0.29  | 0.295 | 0.301 | 0.307 | 0.313 | 0.319 | 0.325 | 0.331 | 0.337 | 0.343 | 0.349 |
| Burkina Faso               | 0.206 | 0.211 | 0.216 | 0.22  | 0.225 | 0.23  | 0.235 | 0.24  | 0.245 | 0.25  | 0.255 | 0.26  | 0.265 | 0.27  | 0.275 | 0.28  | 0.285 | 0.29  | 0.295 | 0.301 | 0.307 | 0.313 | 0.319 | 0.325 | 0.331 | 0.337 | 0.343 | 0.349 |
| Burkina Faso               | 0.206 | 0.211 | 0.216 | 0.22  | 0.225 | 0.23  | 0.235 | 0.24  | 0.245 | 0.25  | 0.255 | 0.26  | 0.265 | 0.27  | 0.275 | 0.28  | 0.285 | 0.29  | 0.295 | 0.301 | 0.307 | 0.313 | 0.319 | 0.325 | 0.331 | 0.337 | 0.343 | 0.349 |
| Burkina Faso               | 0.206 | 0.211 | 0.216 | 0.22  | 0.225 | 0.23  | 0.235 | 0.24  | 0.245 | 0.25  | 0.255 | 0.26  | 0.265 | 0.27  | 0.275 | 0.28  | 0.285 | 0.29  | 0.295 | 0.301 | 0.307 | 0.313 | 0.319 | 0.325 | 0.331 | 0.337 | 0.343 | 0.349 |
| Burkina Faso               | 0.206 | 0.211 | 0.216 | 0.22  | 0.225 | 0.23  | 0.235 | 0.24  | 0.245 | 0.25  | 0.255 | 0.26  | 0.265 | 0.27  | 0.275 | 0.28  | 0.285 | 0.29  | 0.295 | 0.301 | 0.307 | 0.313 | 0.319 | 0.325 | 0.331 | 0.337 | 0.343 | 0.349 |
| Burkina Faso               | 0.206 | 0.211 | 0.216 | 0.22  | 0.225 | 0.23  | 0.235 | 0.24  | 0.245 | 0.25  | 0.255 | 0.26  | 0.265 | 0.27  | 0.275 | 0.28  | 0.285 | 0.29  | 0.295 | 0.301 | 0.307 | 0.313 | 0.319 | 0.325 | 0.331 | 0.337 | 0.343 | 0.349 |
| Burkina Faso               | 0.206 | 0.211 | 0.216 | 0.22  | 0.225 | 0.23  | 0.235 | 0.24  | 0.245 | 0.25  | 0.255 | 0.26  | 0.265 | 0.27  | 0.275 | 0.28  | 0.285 | 0.29  | 0.295 | 0.301 | 0.307 | 0.313 | 0.319 | 0.325 | 0.331 | 0.337 | 0.343 | 0.349 |
| Burkina Faso               | 0.206 | 0.211 | 0.216 | 0.22  | 0.225 | 0.23  | 0.235 | 0.24  | 0.245 | 0.25  | 0.255 | 0.26  | 0.265 | 0.27  | 0.275 | 0.28  | 0.285 | 0.29  | 0.295 | 0.301 | 0.307 | 0.313 | 0.319 | 0.325 | 0.331 | 0.337 | 0.343 | 0.349 |
| Burkina Faso               | 0.206 | 0.211 | 0.216 | 0.22  | 0.225 | 0.23  | 0.235 | 0.24  | 0.245 | 0.25  | 0.255 | 0.26  | 0.265 | 0.27  | 0.275 | 0.28  | 0.285 | 0.29  | 0.295 | 0.301 | 0.307 | 0.313 | 0.319 | 0.325 | 0.331 | 0.337 | 0.343 | 0.349 |
| Burkina Faso               | 0.206 | 0.211 | 0.216 | 0.22  | 0.225 | 0.23  | 0.235 | 0.24  | 0.245 | 0.25  | 0.255 | 0.26  | 0.265 | 0.27  | 0.275 | 0.28  | 0.285 | 0.29  | 0.295 | 0.301 | 0.307 | 0.313 | 0.319 | 0.325 | 0.331 | 0.337 | 0.343 | 0.349 |
| Burkina Faso               | 0.206 | 0.211 | 0.216 | 0.22  | 0.225 | 0.23  | 0.235 | 0.24  | 0.245 | 0.25  | 0.255 | 0.26  | 0.265 | 0.27  | 0.275 | 0.28  | 0.285 | 0.29  | 0.295 | 0.301 | 0.307 | 0.313 | 0.319 | 0.325 | 0.331 | 0.337 | 0.343 | 0.349 |
| Burkina Faso               | 0.206 | 0.211 | 0.216 | 0.22  | 0.225 | 0.23  | 0.235 | 0.24  | 0.245 | 0.25  | 0.255 | 0.26  | 0.265 | 0.27  | 0.275 | 0.28  | 0.285 | 0.29  | 0.295 | 0.301 | 0.307 | 0.313 | 0.319 | 0.325 | 0.331 | 0.337 | 0.343 | 0.349 |
| Burkina Faso               | 0.206 | 0.211 | 0.216 | 0.22  | 0.225 | 0.23  | 0.235 | 0.24  | 0.245 | 0.25  | 0.255 | 0.26  | 0.265 | 0.27  | 0.275 | 0.28  | 0.285 | 0.29  | 0.295 | 0.301 | 0.307 | 0.313 | 0.319 | 0.325 | 0.331 | 0.337 | 0.343 | 0.349 |
| Burkina Faso               | 0.206 | 0.211 | 0.216 | 0.22  | 0.225 | 0.23  | 0.235 | 0.24  | 0.245 | 0.25  | 0.255 | 0.26  | 0.265 | 0.27  | 0.275 | 0.28  | 0.285 | 0.29  | 0.295 | 0.301 | 0.307 | 0.313 | 0.319 | 0.325 | 0.331 | 0.337 | 0.343 | 0.349 |
| Burkina Faso               | 0.206 | 0.211 | 0.216 | 0.22  | 0.225 | 0.23  | 0.235 | 0.24  | 0.245 | 0.25  | 0.255 | 0.26  | 0.265 | 0.27  | 0.275 | 0.28  | 0.285 | 0.29  | 0.295 | 0.301 | 0.307 | 0.313 | 0.319 | 0.325 | 0.331 | 0.337 | 0.343 | 0.349 |
| Burkina Faso               | 0.206 | 0.211 | 0.216 | 0.22  | 0.225 | 0.23  | 0.235 | 0.24  | 0.245 | 0.25  | 0.255 | 0.26  | 0.265 | 0.27  | 0.275 | 0.28  | 0.285 | 0.29  | 0.295 | 0.301 | 0.307 | 0.313 | 0.319 | 0.325 | 0.331 | 0.337 | 0.343 | 0.349 |
| Burkina Faso               | 0.206 | 0.211 | 0.216 | 0.22  | 0.225 | 0.23  | 0.235 | 0.24  | 0.245 | 0.25  | 0.255 | 0.26  | 0.265 | 0.27  | 0.275 | 0.28  | 0.285 | 0.29  | 0.295 | 0.301 | 0.307 | 0.313 | 0.319 | 0.325 | 0.331 | 0.337 | 0.343 | 0.349 |
| Burkina Faso               | 0.206 | 0.211 | 0.216 | 0.22  | 0.225 | 0.23  | 0.235 | 0.24  | 0.245 | 0.25  | 0.255 | 0.26  | 0.265 | 0.27  | 0.275 | 0.28  |       |       |       |       |       |       |       |       |       |       |       |       |

**Appendix Table 11. Correlations of cumulative total fertility up to maternal age 25 (TFU25), cumulative total fertility from maternal age 30 to age 55 (TFO30), and age-specific fertility, for each Socio-demographic Index (SDI) quintile for under 5 mortality, demand for contraception satisfied with modern methods, and female education for 2017.**

|            | Low SDI           |               |           | Low-middle SDI    |               |           | Middle SDI        |               |           | High-middle SDI   |               |           | High SDI          |               |           |
|------------|-------------------|---------------|-----------|-------------------|---------------|-----------|-------------------|---------------|-----------|-------------------|---------------|-----------|-------------------|---------------|-----------|
|            | Under 5 mortality | Contraception | Education | Under 5 mortality | Contraception | Education | Under 5 mortality | Contraception | Education | Under 5 mortality | Contraception | Education | Under 5 mortality | Contraception | Education |
| TFR        | 0.66              | -0.76         | -0.72     | 0.68              | -0.80         | -0.73     | 0.77              | -0.71         | -0.83     | 0.64              | -0.27         | -0.79     | 0.72              | 0.05          | -0.70     |
| TFU25      | 0.68              | -0.61         | -0.76     | 0.65              | -0.62         | -0.65     | 0.73              | -0.59         | -0.77     | 0.61              | -0.41         | -0.76     | 0.65              | -0.45         | -0.65     |
| TFO30      | 0.53              | -0.76         | -0.53     | 0.64              | -0.84         | -0.72     | 0.73              | -0.62         | -0.78     | 0.60              | -0.13         | -0.73     | 0.55              | 0.43          | -0.49     |
| ASFR 10-14 | 0.35              | NA            | -0.32     | 0.18              | NA            | -0.25     | 0.10              | NA            | -0.18     | -0.02             | NA            | -0.07     | 0.13              | NA            | -0.17     |
| ASFR 15-19 | 0.64              | -0.52         | -0.67     | 0.57              | -0.46         | -0.54     | 0.55              | -0.26         | -0.56     | 0.45              | -0.19         | -0.54     | 0.43              | -0.36         | -0.25     |
| ASFR 20-24 | 0.66              | -0.63         | -0.78     | 0.64              | -0.64         | -0.65     | 0.75              | -0.66         | -0.79     | 0.65              | -0.46         | -0.82     | 0.69              | -0.44         | -0.76     |
| ASFR 25-29 | 0.60              | -0.70         | -0.67     | 0.66              | -0.74         | -0.66     | 0.74              | -0.71         | -0.76     | 0.62              | -0.30         | -0.76     | 0.65              | 0.02          | -0.72     |
| ASFR 30-34 | 0.57              | -0.77         | -0.60     | 0.64              | -0.82         | -0.69     | 0.73              | -0.65         | -0.78     | 0.58              | -0.14         | -0.72     | 0.48              | 0.42          | -0.47     |
| ASFR 35-39 | 0.52              | -0.75         | -0.52     | 0.63              | -0.83         | -0.70     | 0.72              | -0.59         | -0.78     | 0.58              | -0.12         | -0.73     | 0.56              | 0.35          | -0.50     |
| ASFR 40-44 | 0.45              | -0.72         | -0.38     | 0.59              | -0.83         | -0.69     | 0.70              | -0.60         | -0.73     | 0.64              | -0.19         | -0.76     | 0.66              | 0.20          | -0.59     |
| ASFR 45-49 | 0.20              | -0.51         | -0.28     | 0.56              | -0.71         | -0.70     | 0.64              | -0.50         | -0.70     | 0.60              | -0.26         | -0.71     | 0.63              | 0.18          | -0.53     |
| ASFR 50-54 | 0.20              | NA            | -0.30     | 0.56              | NA            | -0.70     | 0.64              | NA            | -0.69     | 0.60              | NA            | -0.68     | 0.63              | NA            | -0.51     |
